# Supplementary material for: Copper-catalyzed methylative difunctionalization of alkenes
Source: PubMed Central journal article supplement (PMC6137206; doi:10.1038/s41467-018-06246-6), 2018-09-13
Supplement: 41467_2018_6246_MOESM1_ESM.pdf [file 41467_2018_6246_MOESM1_ESM.pdf]

## Supplementary Information

# Copper-catalyzed methylative difunctionalization of alkenes

Xu Bao, Takayuki Yokoe, Tu M. Ha, Qian Wang and Jieping Zhu\*

Laboratory of Synthesis and Natural Products, Institute of Chemical Sciences and Engineering,  
Ecole Polytechnique Fédérale de Lausanne, EPFL-SB-ISIC-LSPN, BCH5304, CH-1015  
Lausanne (Switzerland)

E-mail: [jieping.zhu@epfl.ch](mailto:jieping.zhu@epfl.ch)

## Supplementary Figures

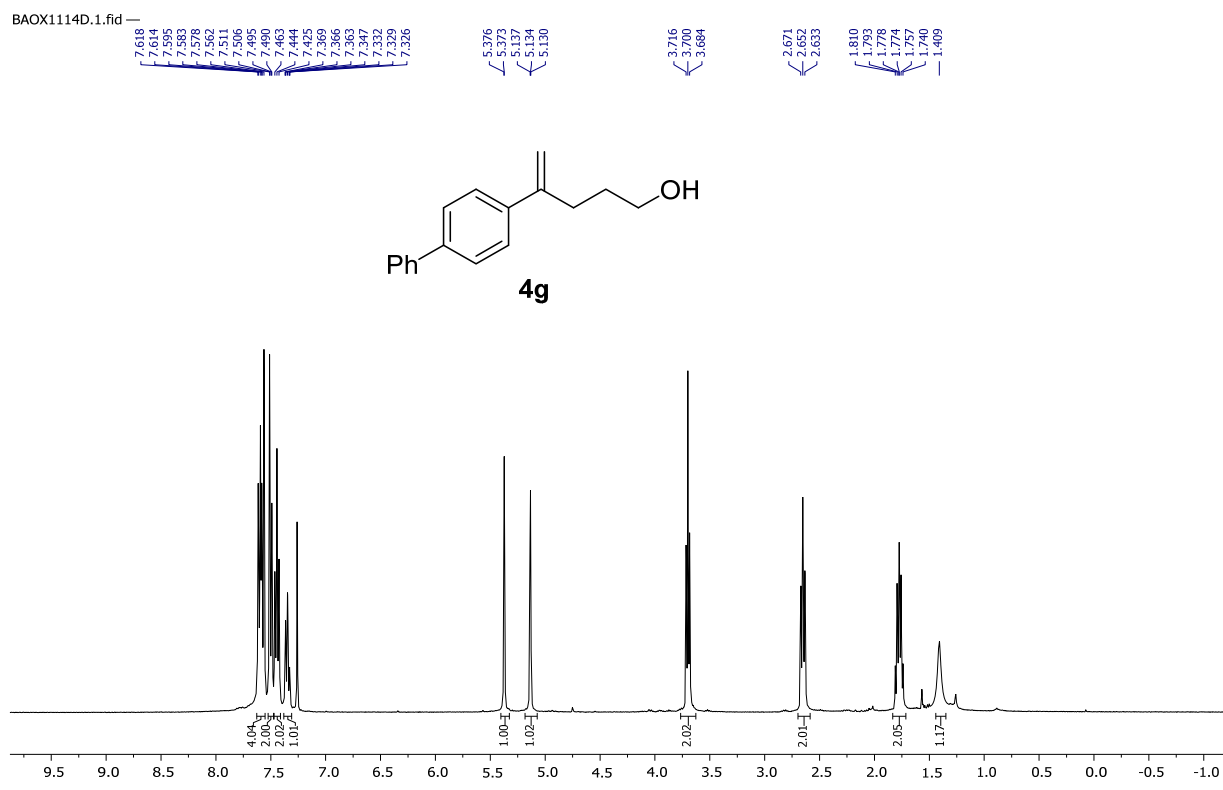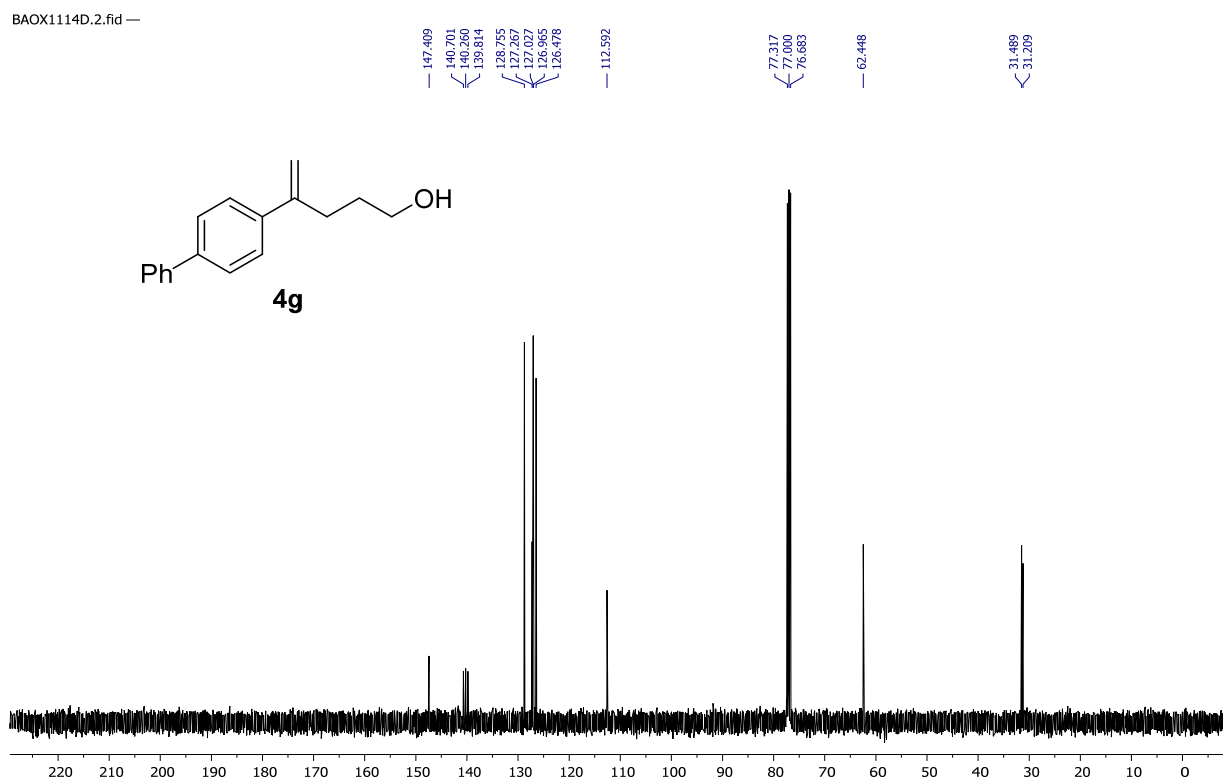

Supplementary Figure 1. <sup>1</sup>H and <sup>13</sup>C NMR spectra of **4g**

BAOX1113D.1.fid —

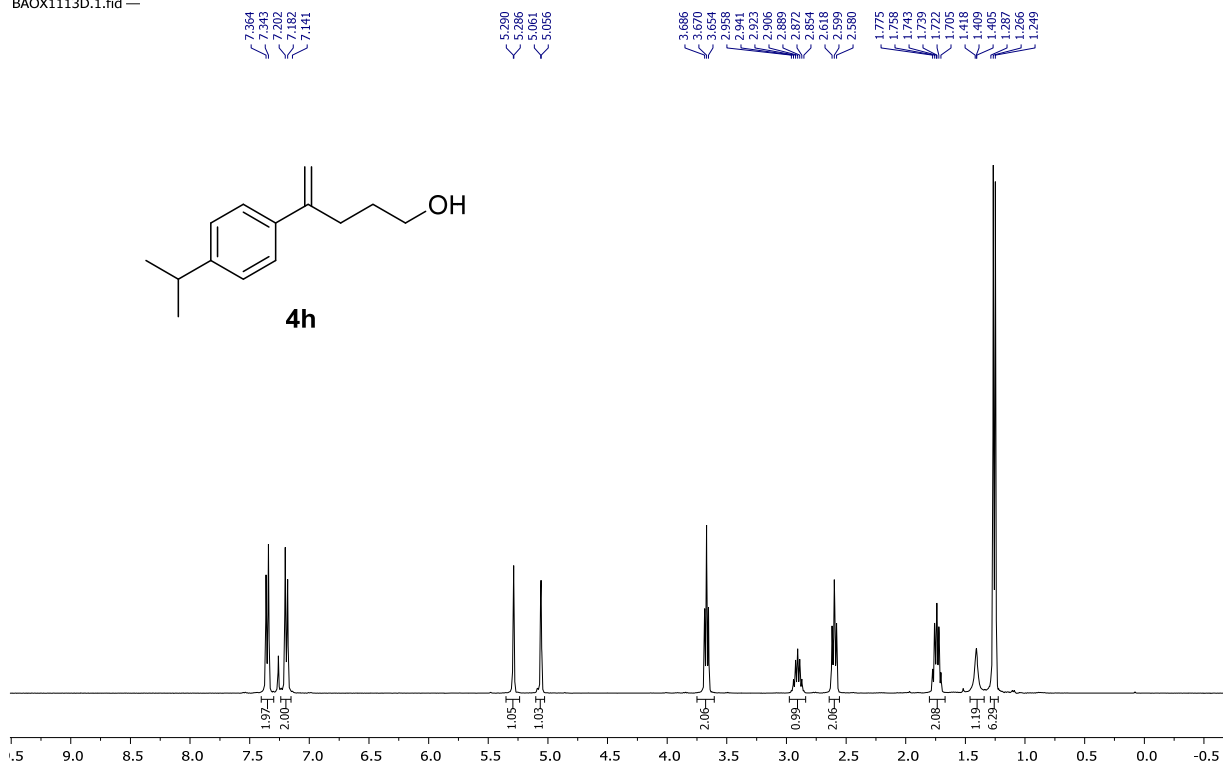

BAOX1113D.2.fid —

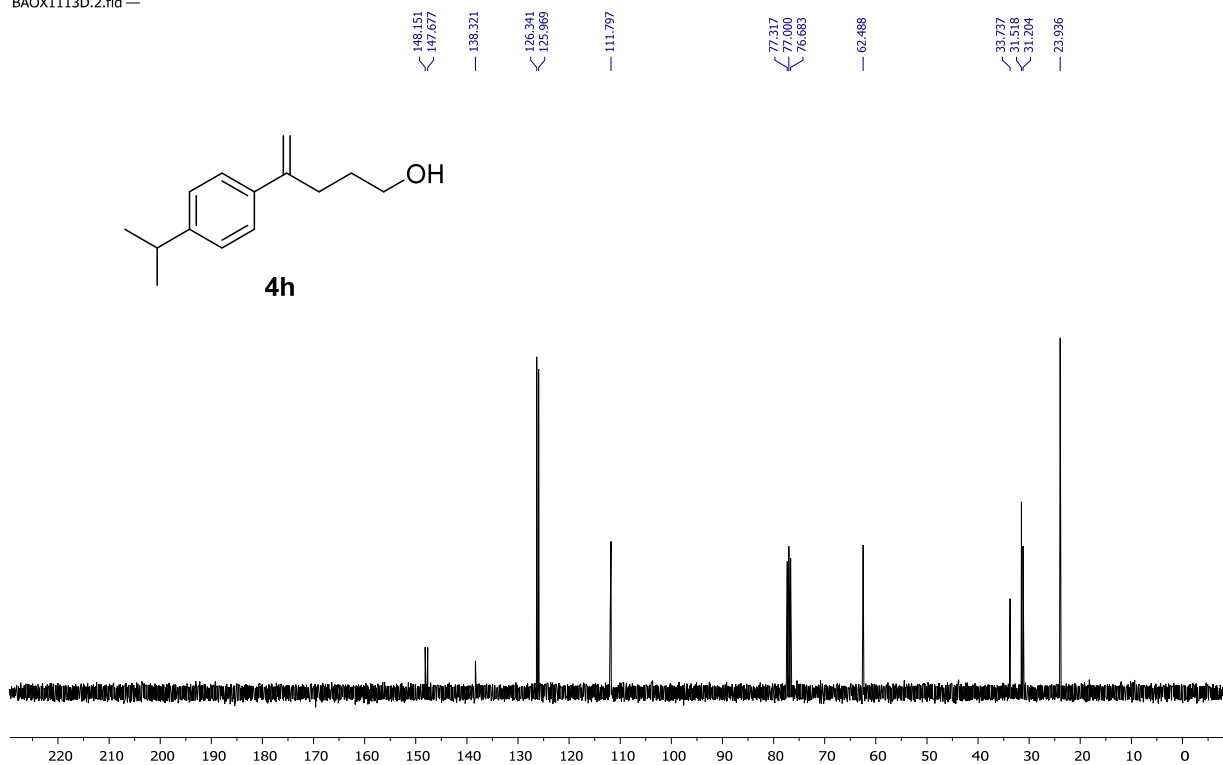

Supplementary Figure 2. <sup>1</sup>H and <sup>13</sup>C NMR spectra of 4h

BAOX1122C.1.fid —

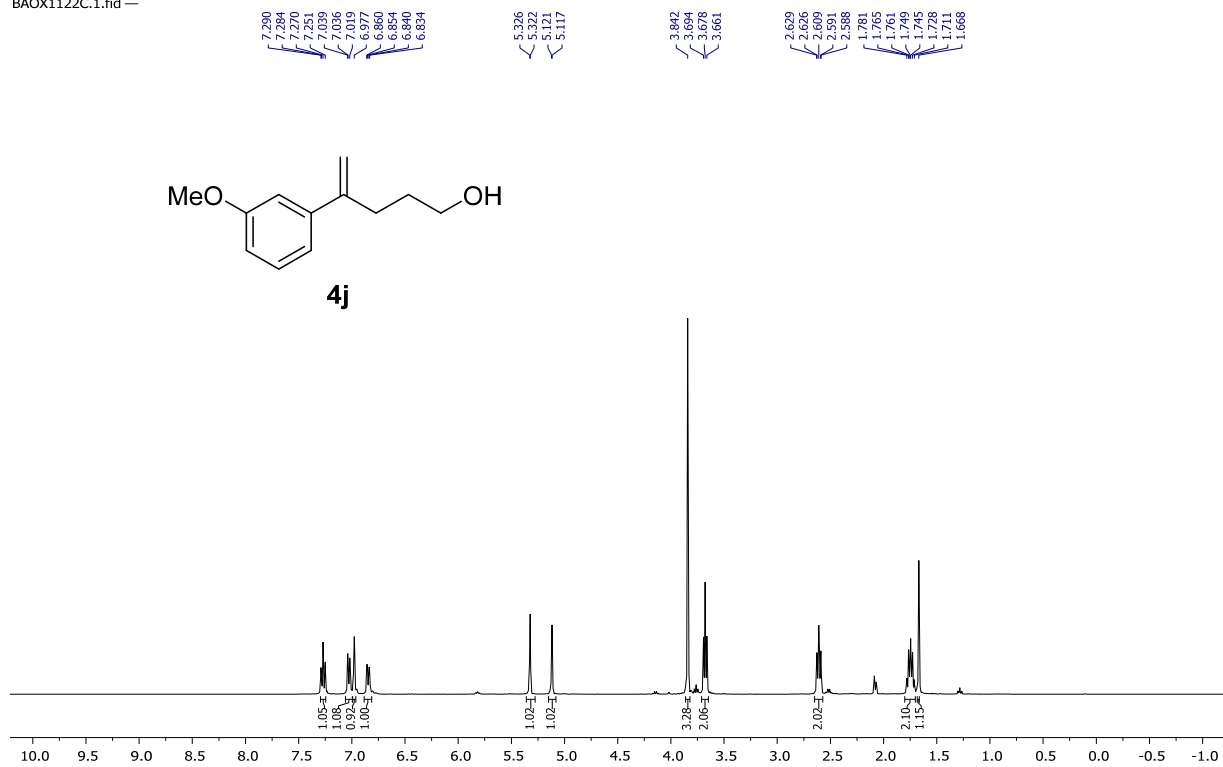

BAOX1122C.2.fid —

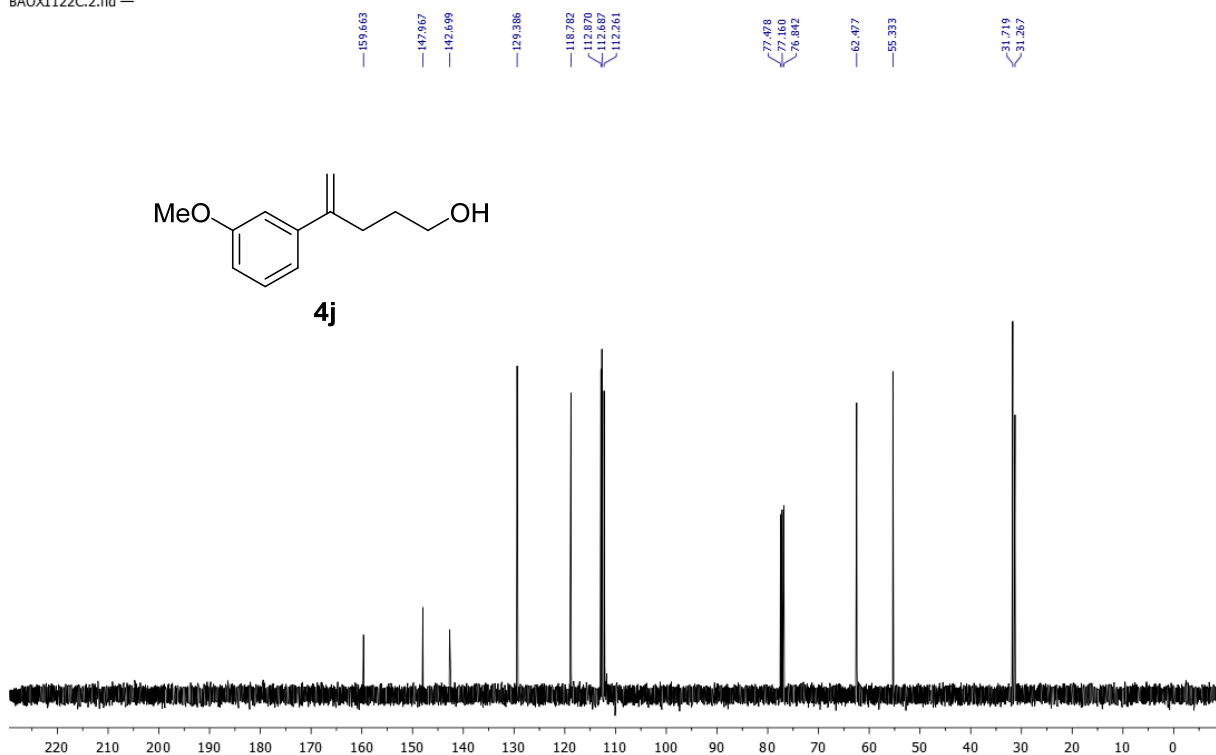

Supplementary Figure 3. <sup>1</sup>H and <sup>13</sup>C NMR spectra of 4j

BAOX1122E.4.fid — refe\_1H\_zq CDCl3 /opt/ xbao 26

7.164  
7.161  
7.158  
7.154  
7.149  
7.145  
7.140  
7.132  
7.126  
7.121  
7.117  
7.113

5.181  
5.099  
5.006

3.561  
3.529

2.472  
2.469  
2.454  
2.450  
2.434  
2.431

1.624  
1.607  
1.603  
1.598  
1.586  
1.574  
1.570  
1.553

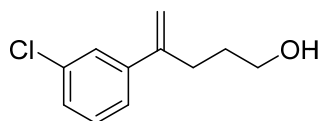

**4k**

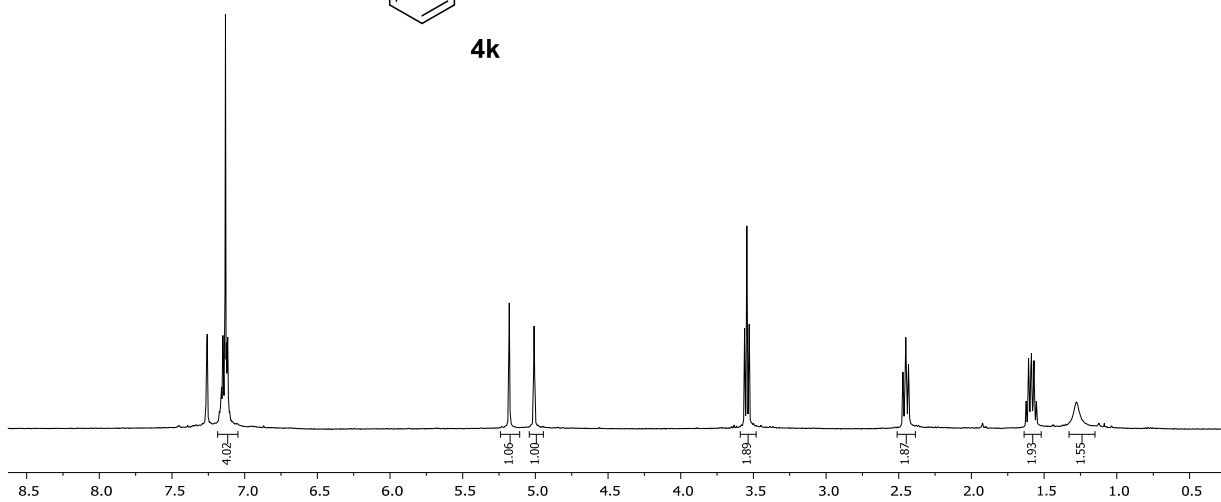

BAOX1122E.3.fid — refe\_13C\_cpd CDCl3 /opt/ xbao 26

146.831  
143.031  
134.334  
129.659  
127.514  
126.394  
124.371  
113.774

77.480  
77.162  
76.845  
62.285

31.461  
31.055

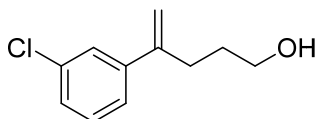

**4k**

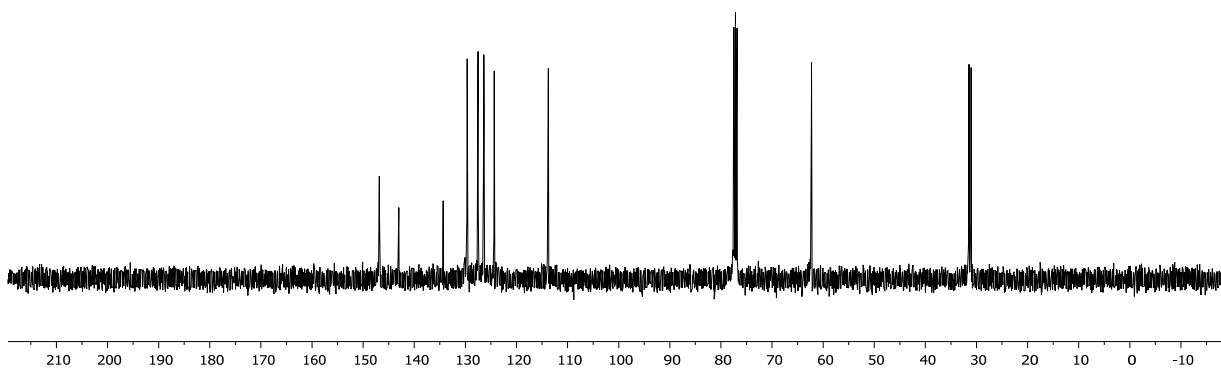

Supplementary Figure 4. <sup>1</sup>H and <sup>13</sup>C NMR spectra of 4k

BAOX1122D.1.fid —

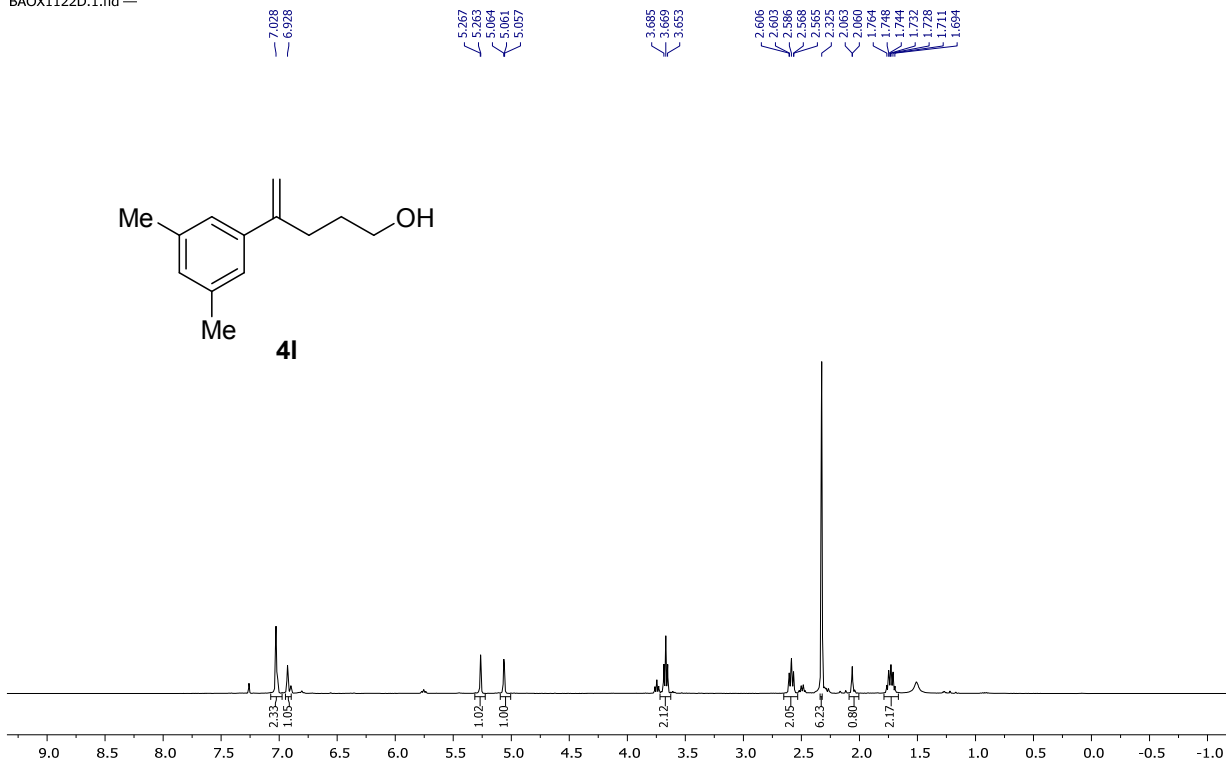

BAOX1122D.2.fid —

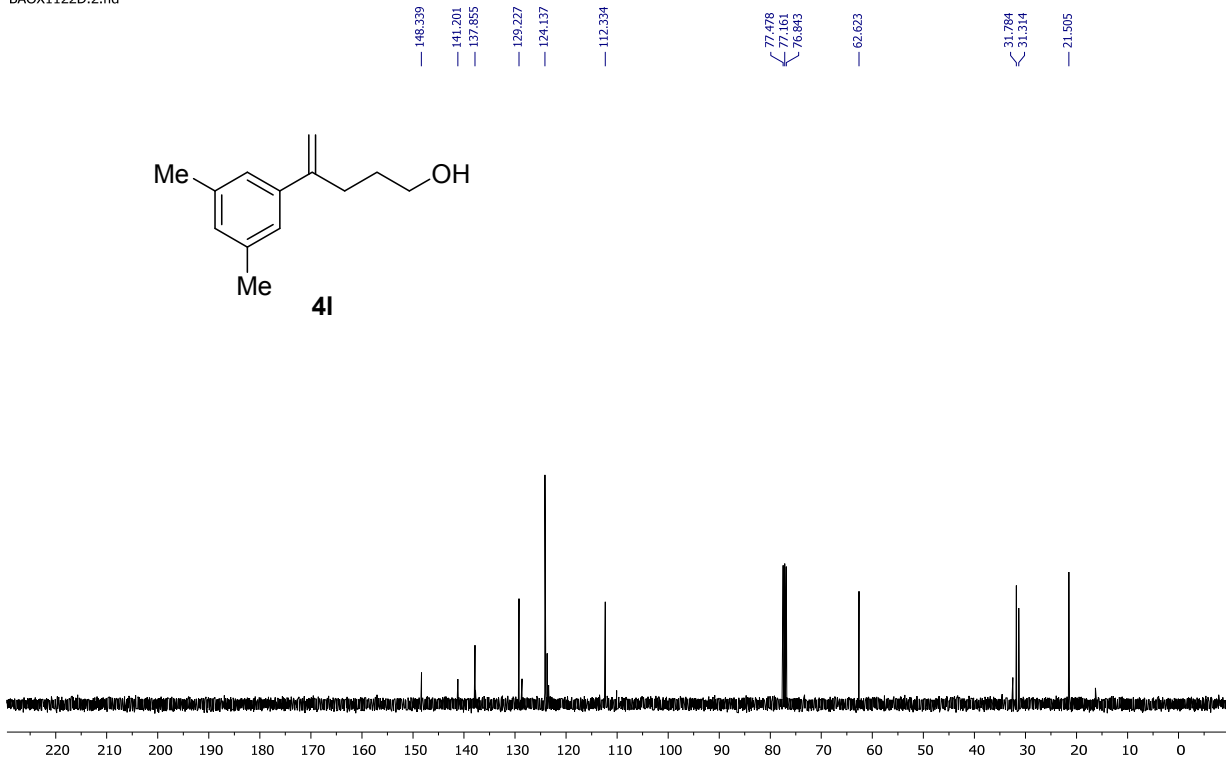

Supplementary Figure 5. <sup>1</sup>H and <sup>13</sup>C NMR spectra of 41

BAOX1360E.1.fid —

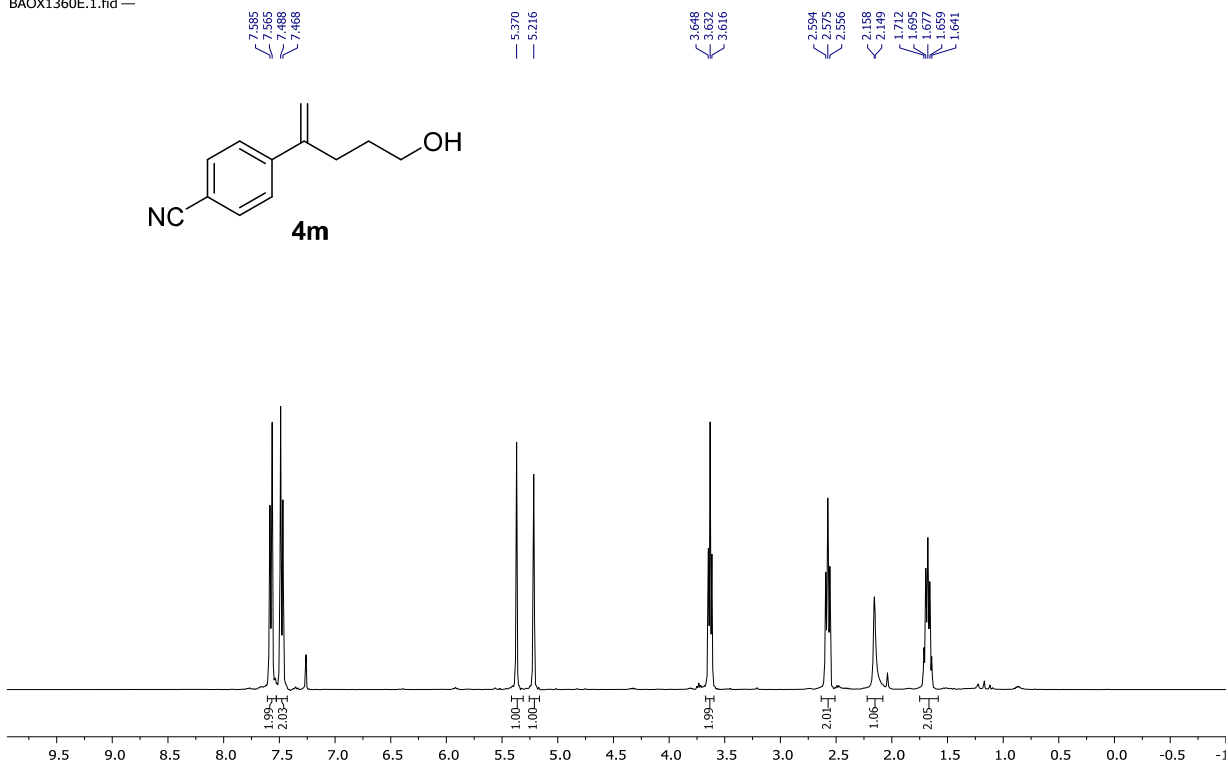

BAOX1360E.2.fid —

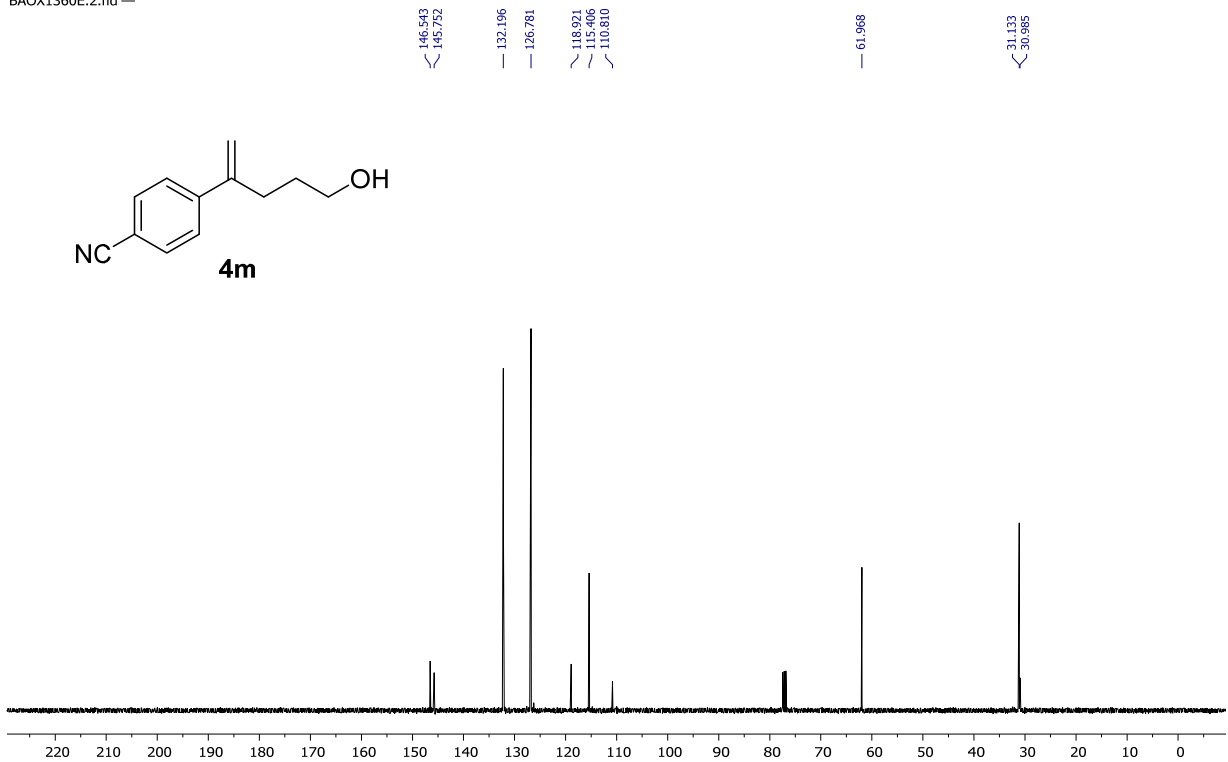

Supplementary Figure 6. <sup>1</sup>H and <sup>13</sup>C NMR spectra of 4m

BAOX1140E.1.fid — ChemInfo\_1Hzg CDCI3 /opt/ xbao 47

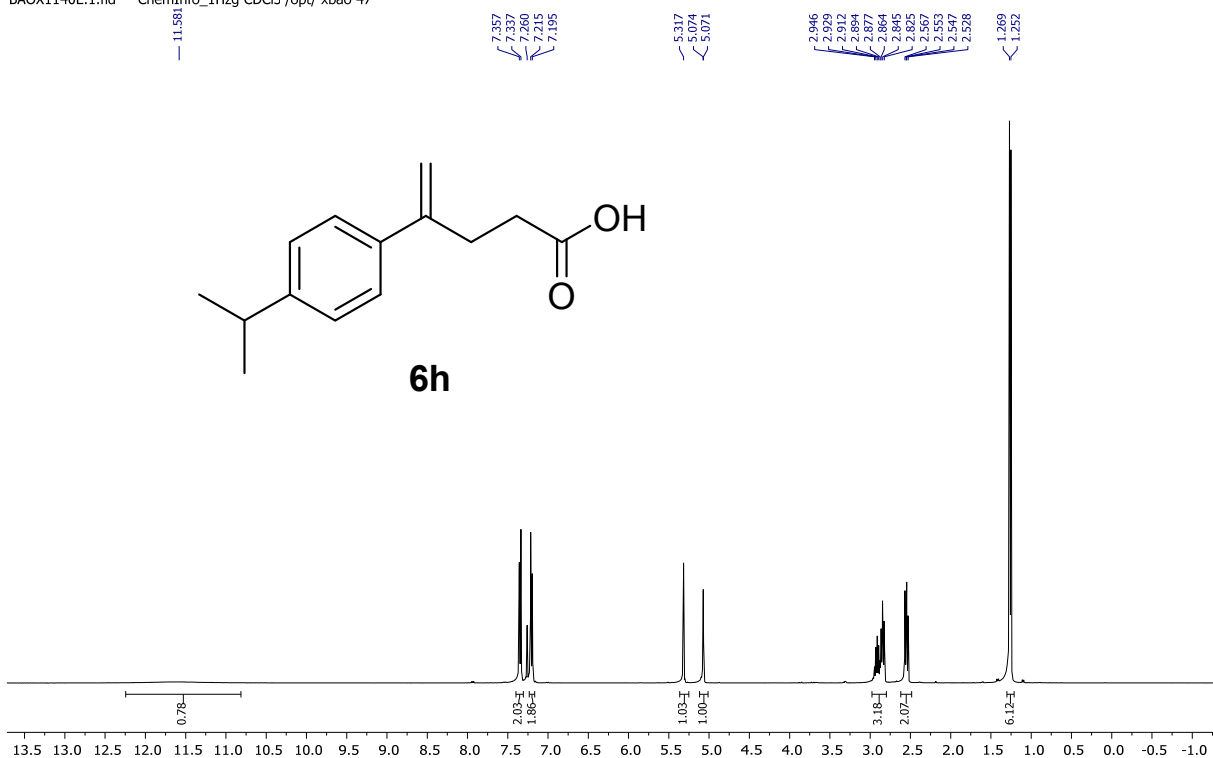

BAOX1140E.1.fid —

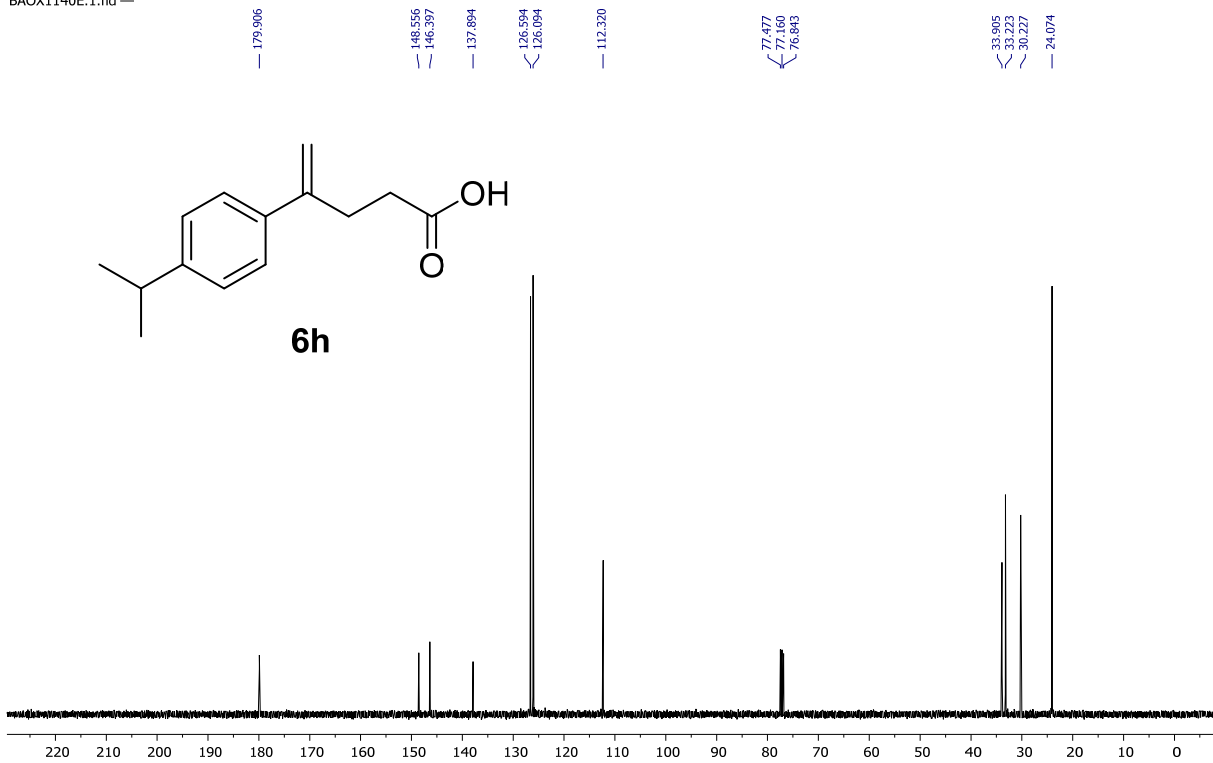

Supplementary Figure 7. <sup>1</sup>H and <sup>13</sup>C NMR spectra of 6h



BAOX1127B.1.fid —

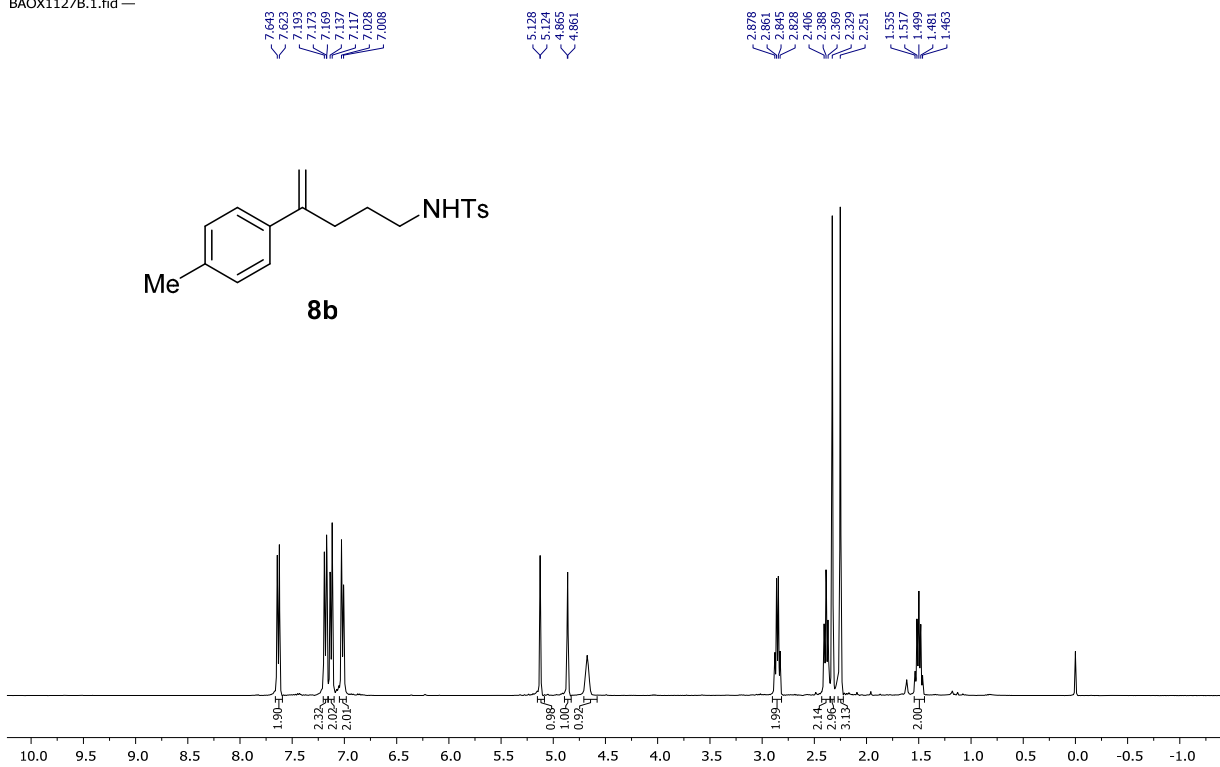

BAOX1127B.2.fid —

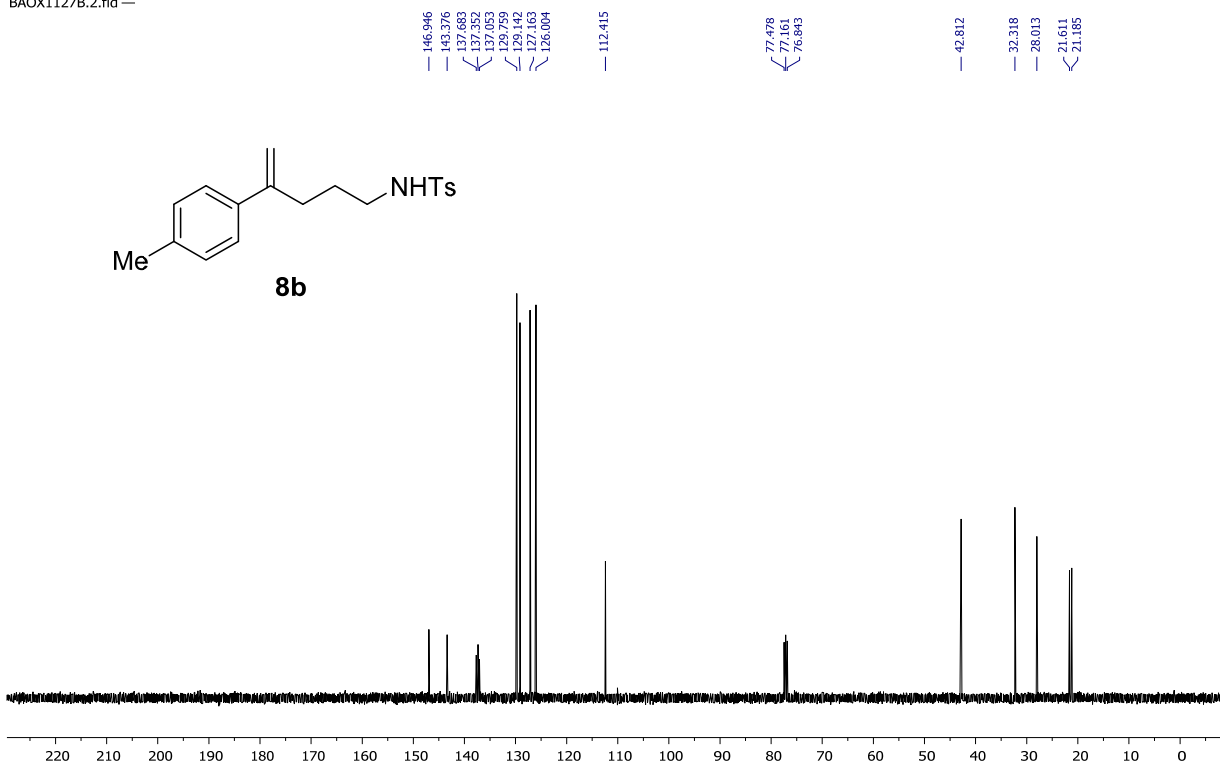

Supplementary Figure 8. <sup>1</sup>H and <sup>13</sup>C NMR spectra of **8b**

BAOX1127C.2.fid —

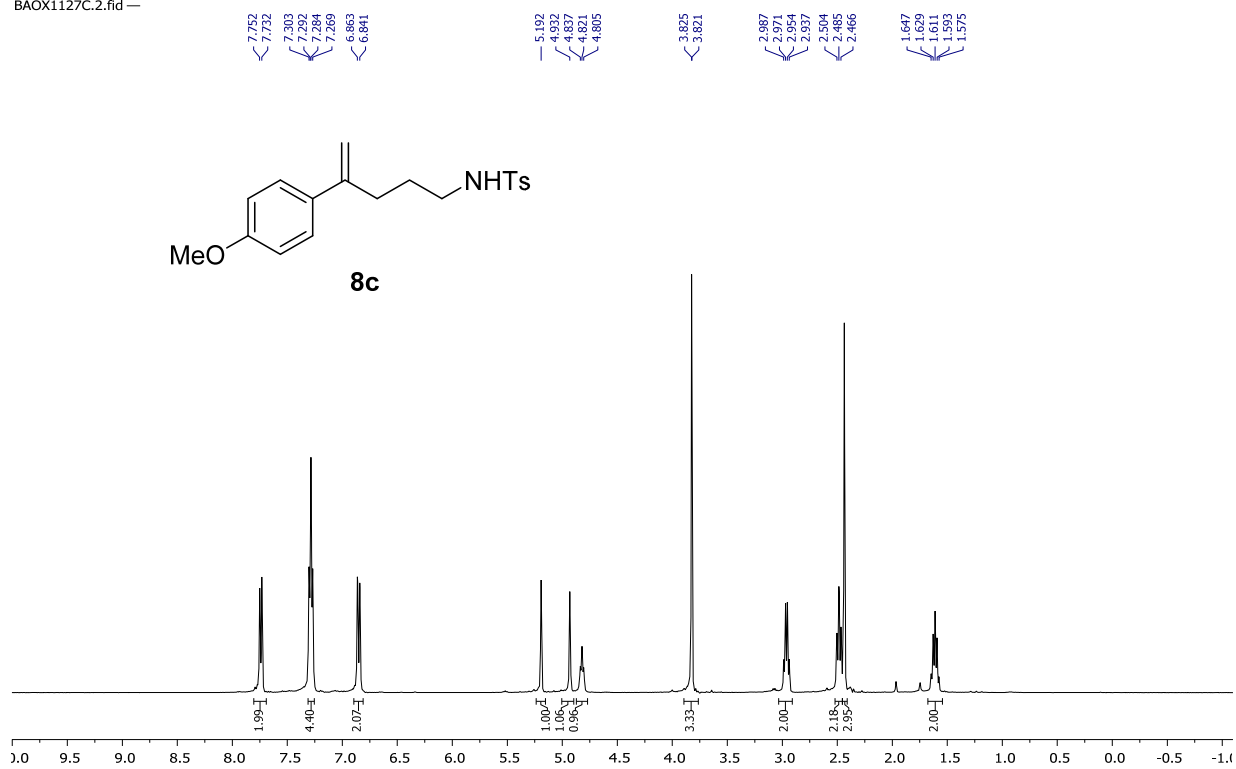

BAOX1127C.3.fid —

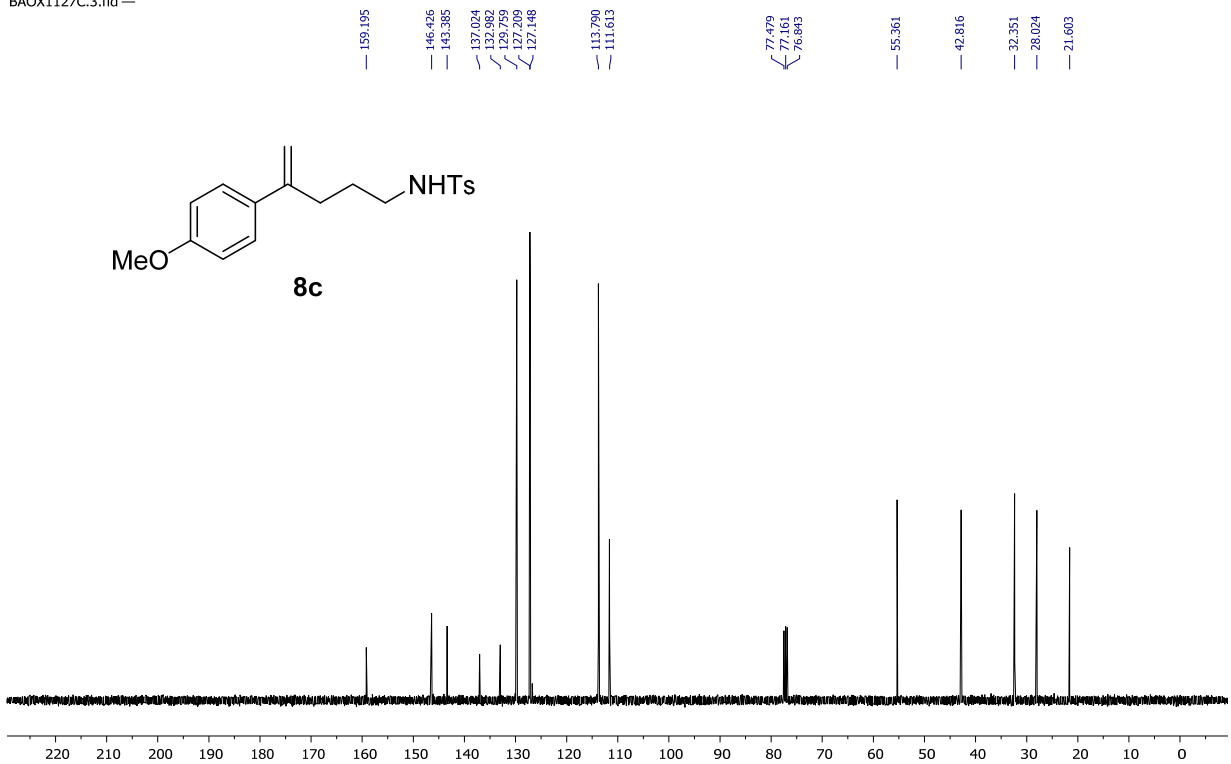

Supplementary Figure 9. <sup>1</sup>H and <sup>13</sup>C NMR spectra of **8c**

BAOX1127D.1.fid

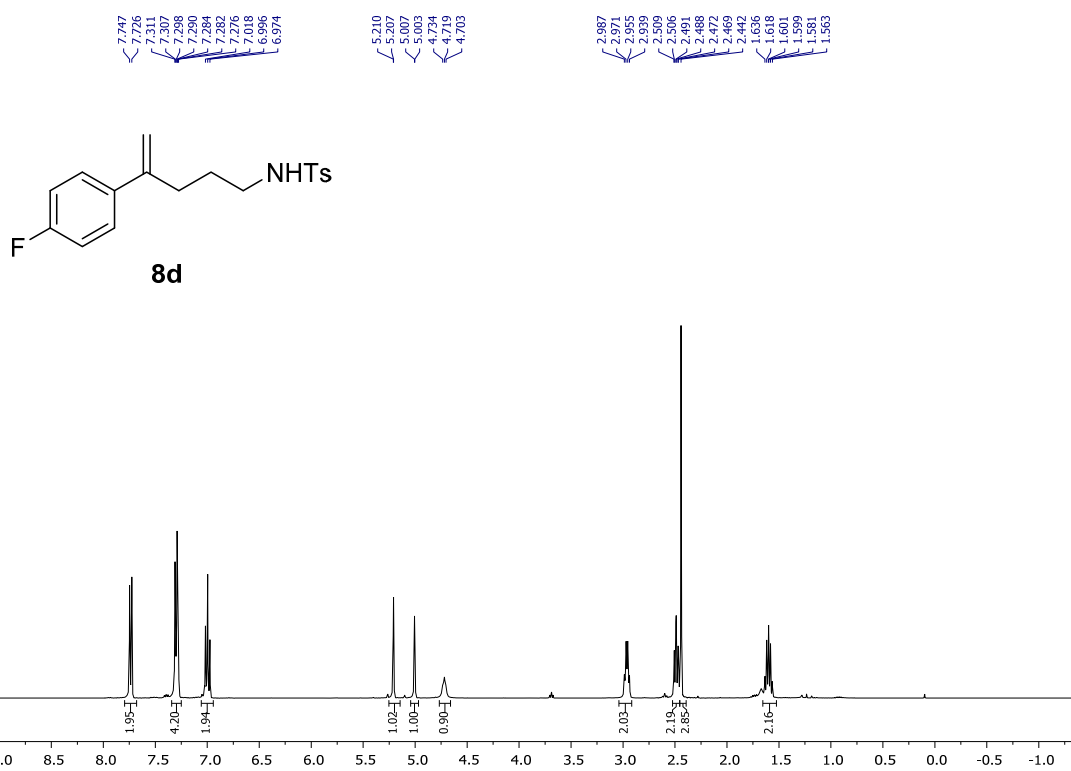

BAOX1127D.2.fid

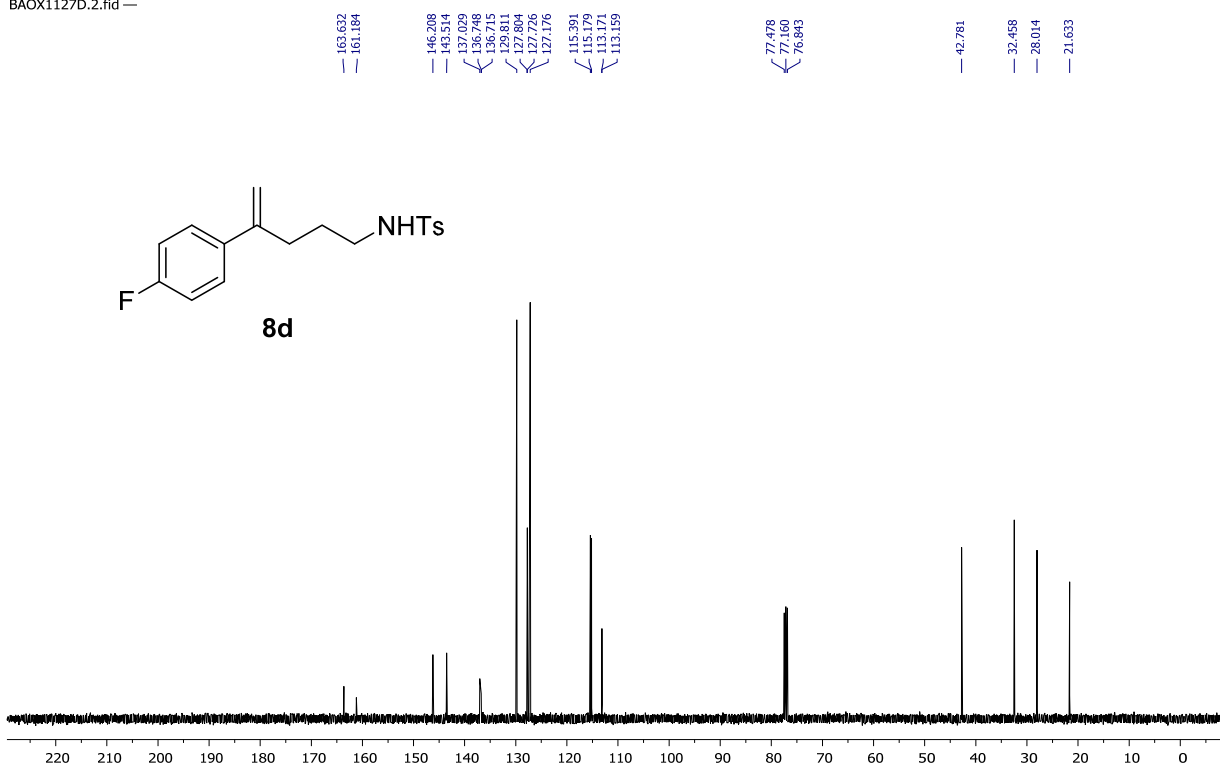

Supplementary Figure 10.  $^1\text{H}$  and  $^{13}\text{C}$  NMR spectra of **8d**

BAOX1127E.1.fid —

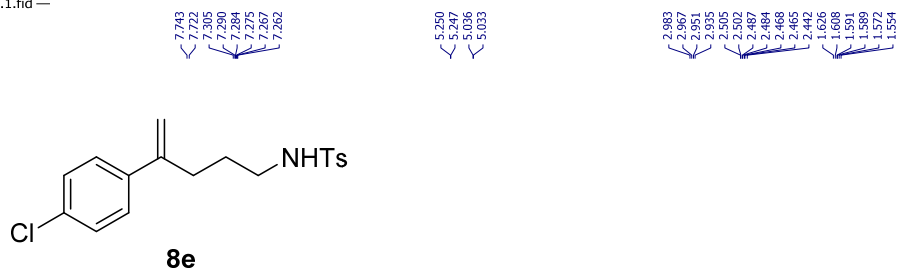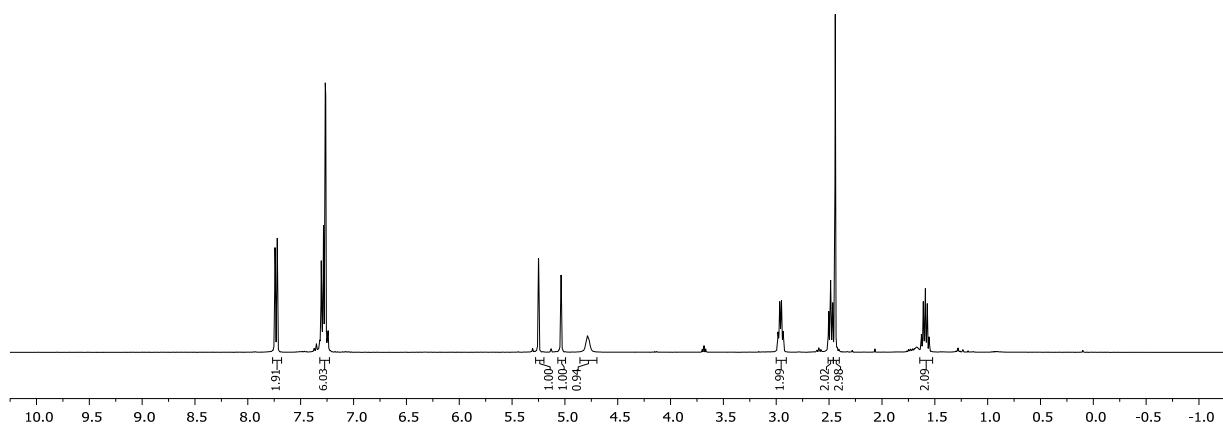

BAOX1127E.2.fid —

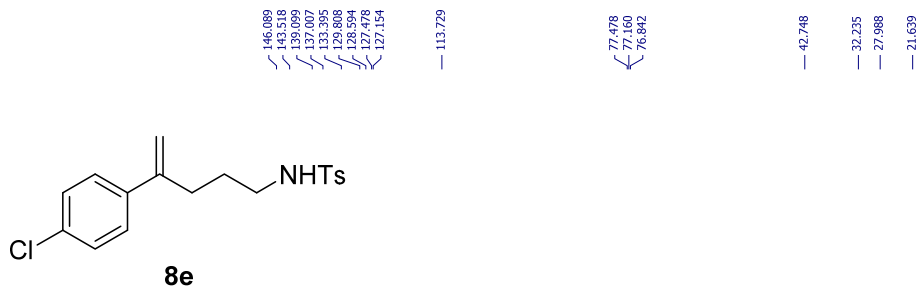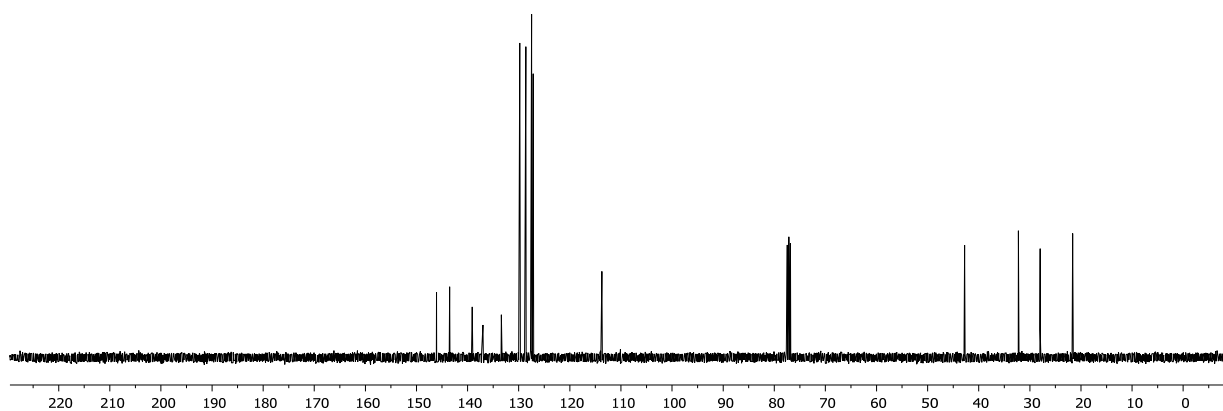

Supplementary Figure 11.  $^1\text{H}$  and  $^{13}\text{C}$  NMR spectra of **8e**

BAOX1130C.1.fid —

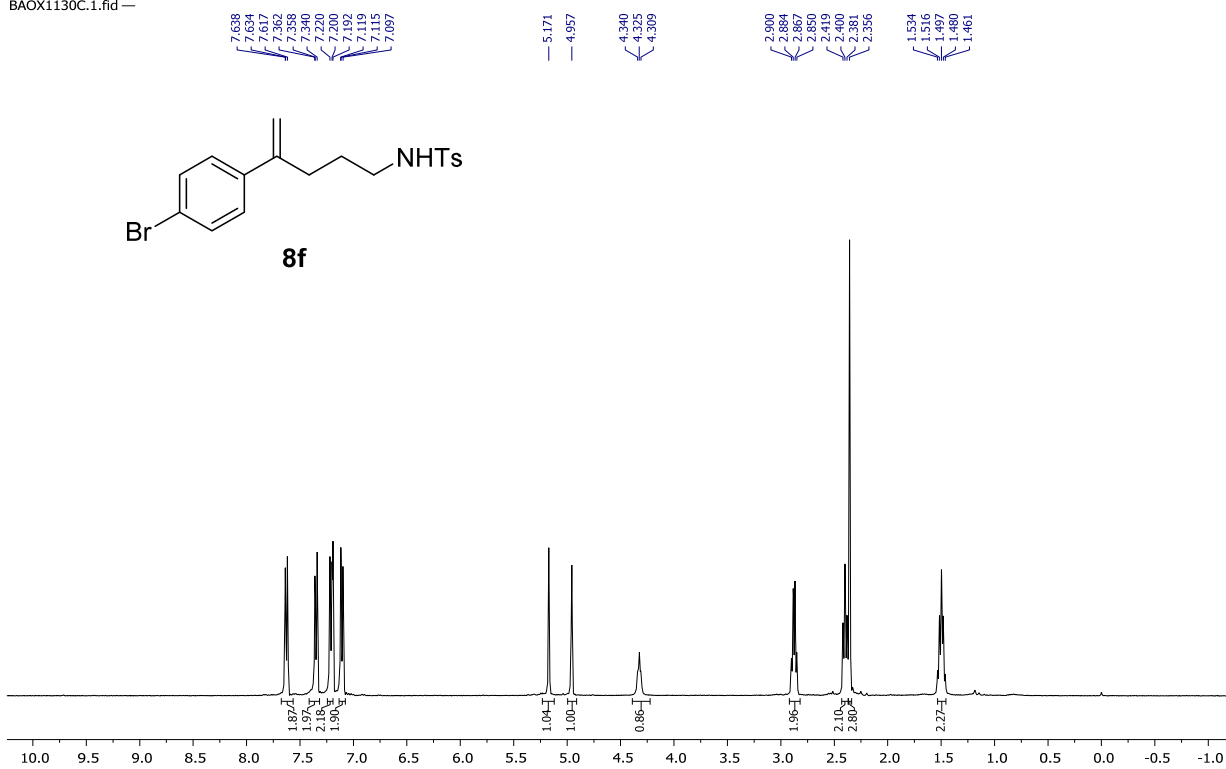

BAOX1130C.2.fid —

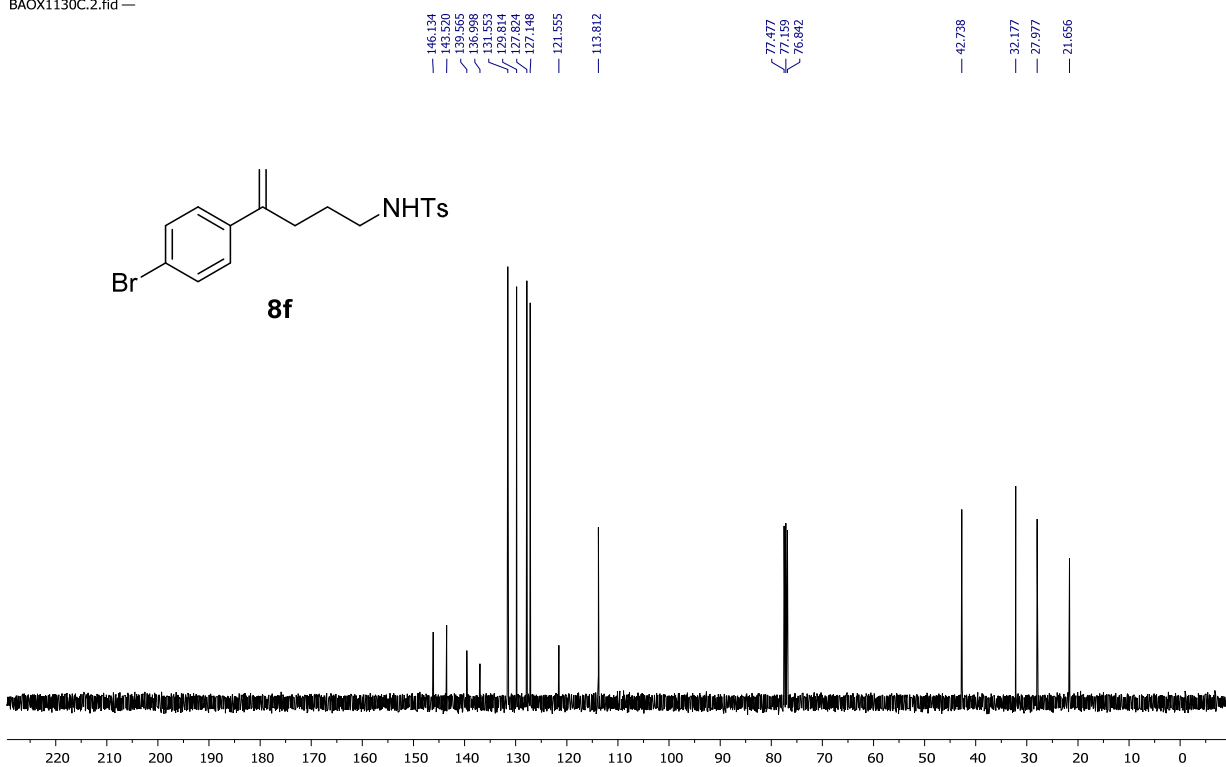

Supplementary Figure 12. <sup>1</sup>H and <sup>13</sup>C NMR spectra of **8f**

BAOX1132D.1.fid

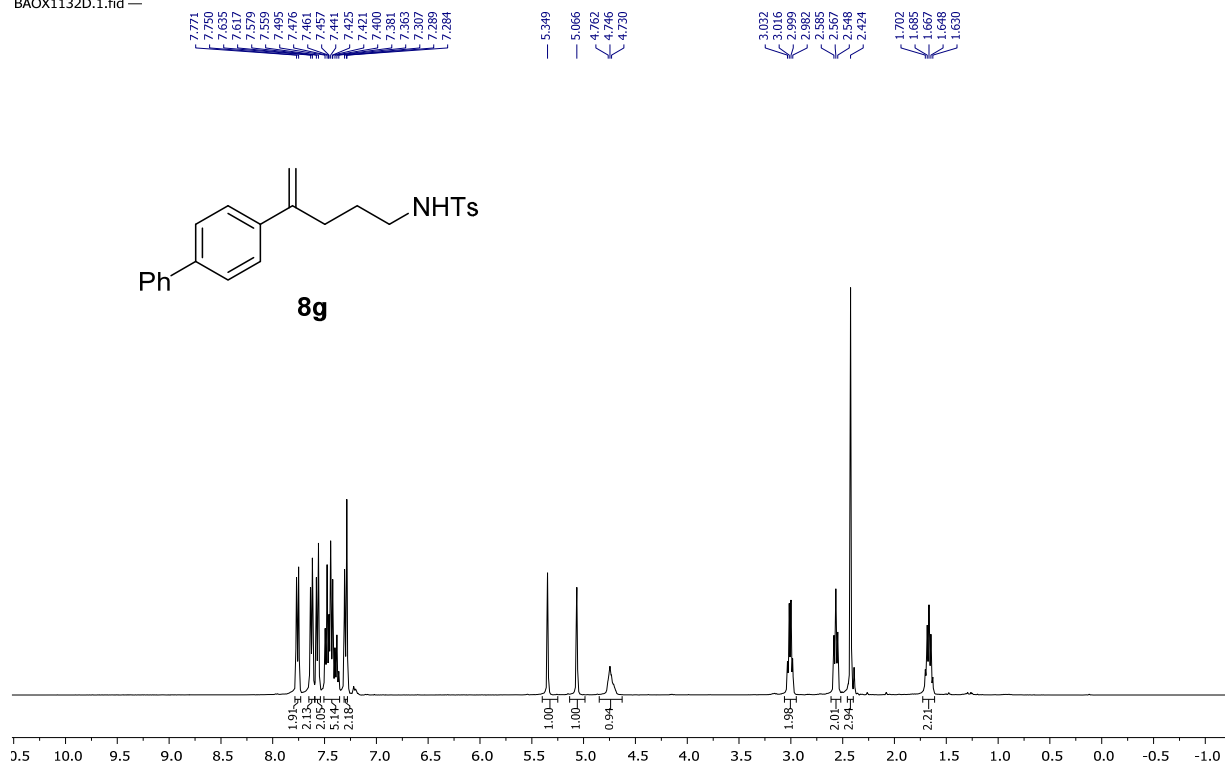

BAOX1132D.2.fid

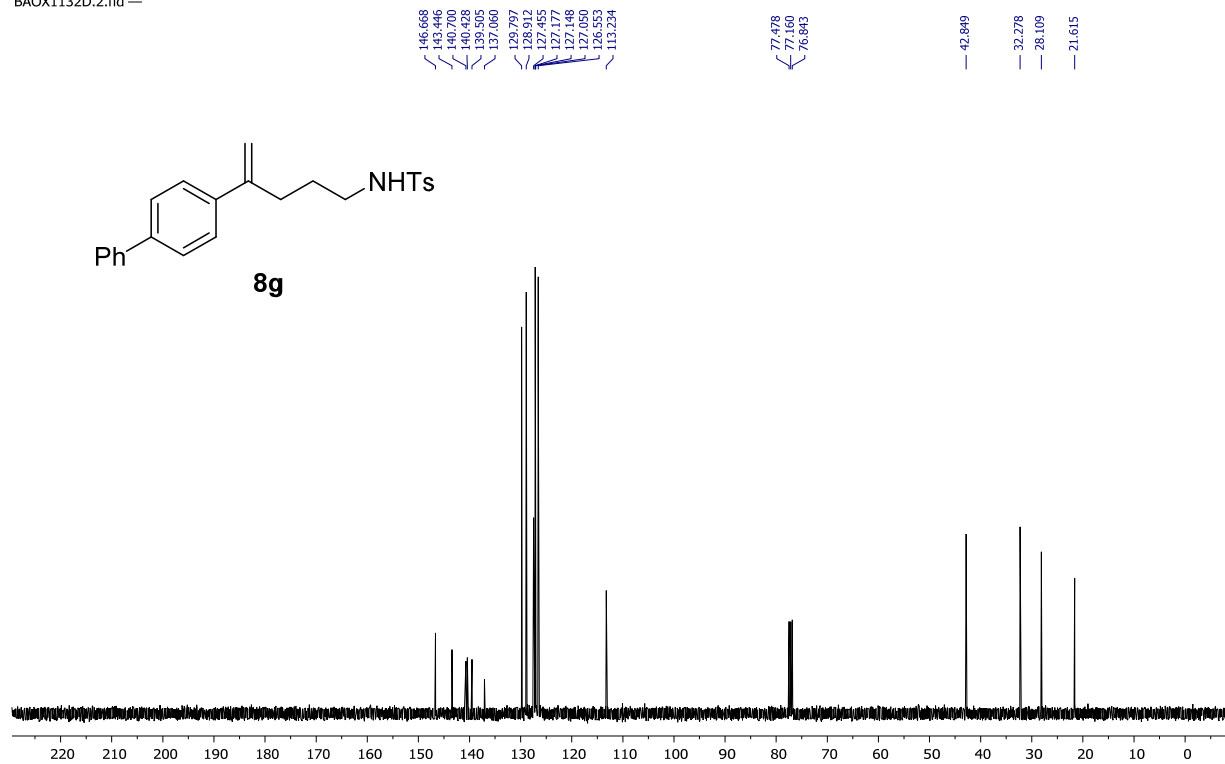

Supplementary Figure 13. <sup>1</sup>H and <sup>13</sup>C NMR spectra of **8g**

BAOX1131A.1.fid —

7.761, 7.741, 7.315, 7.296, 7.292, 7.285, 7.276, 7.271, 7.198, 7.177, 5.257, 5.253, 4.982, 4.978, 4.721, 4.705, 4.689, 3.004, 2.987, 2.970, 2.954, 2.941, 2.923, 2.906, 2.889, 2.872, 2.859, 2.800, 2.445, 1.686, 1.667, 1.649, 1.631, 1.613, 1.595, 1.386, 1.269

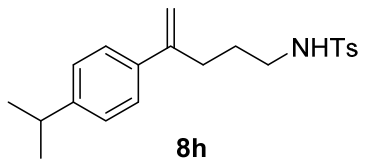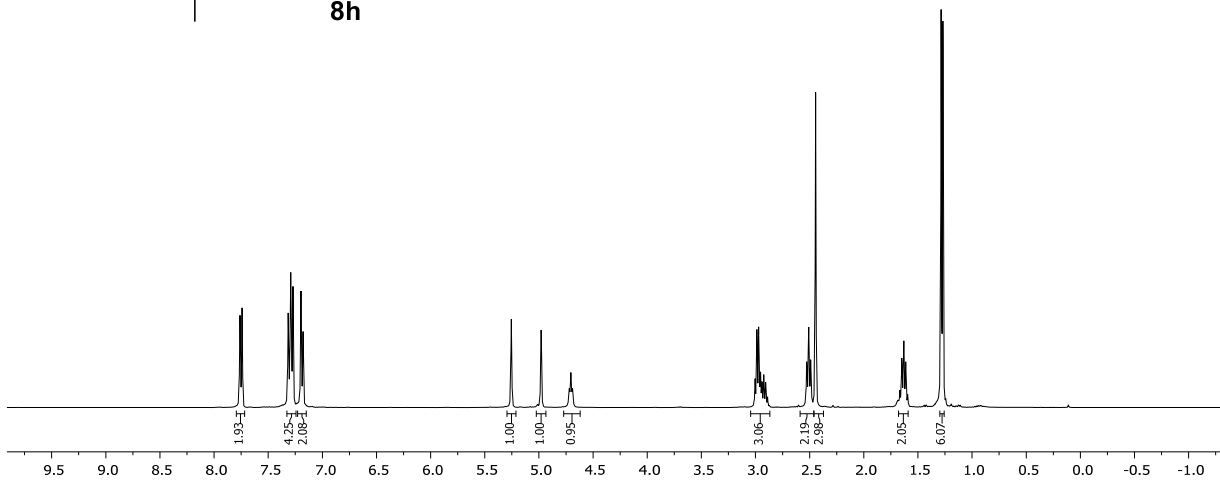

BAOX1131A.2.fid —

148.376, 146.936, 143.407, 138.030, 137.079, 128.783, 127.192, 126.508, 126.044, 112.454, 77.478, 77.160, 76.842, 42.867, 33.857, 32.325, 28.070, 24.058, 21.632

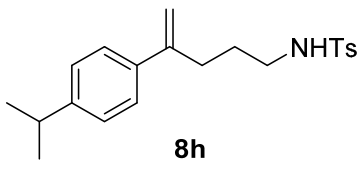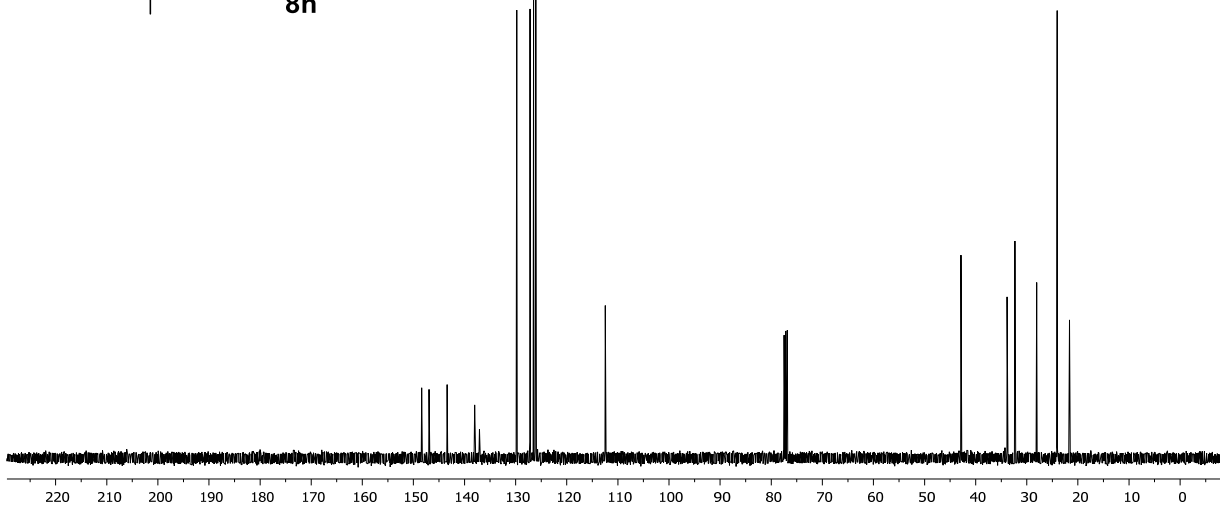

Supplementary Figure 14. <sup>1</sup>H and <sup>13</sup>C NMR spectra of 8h

BAOX1130A.1.fid —

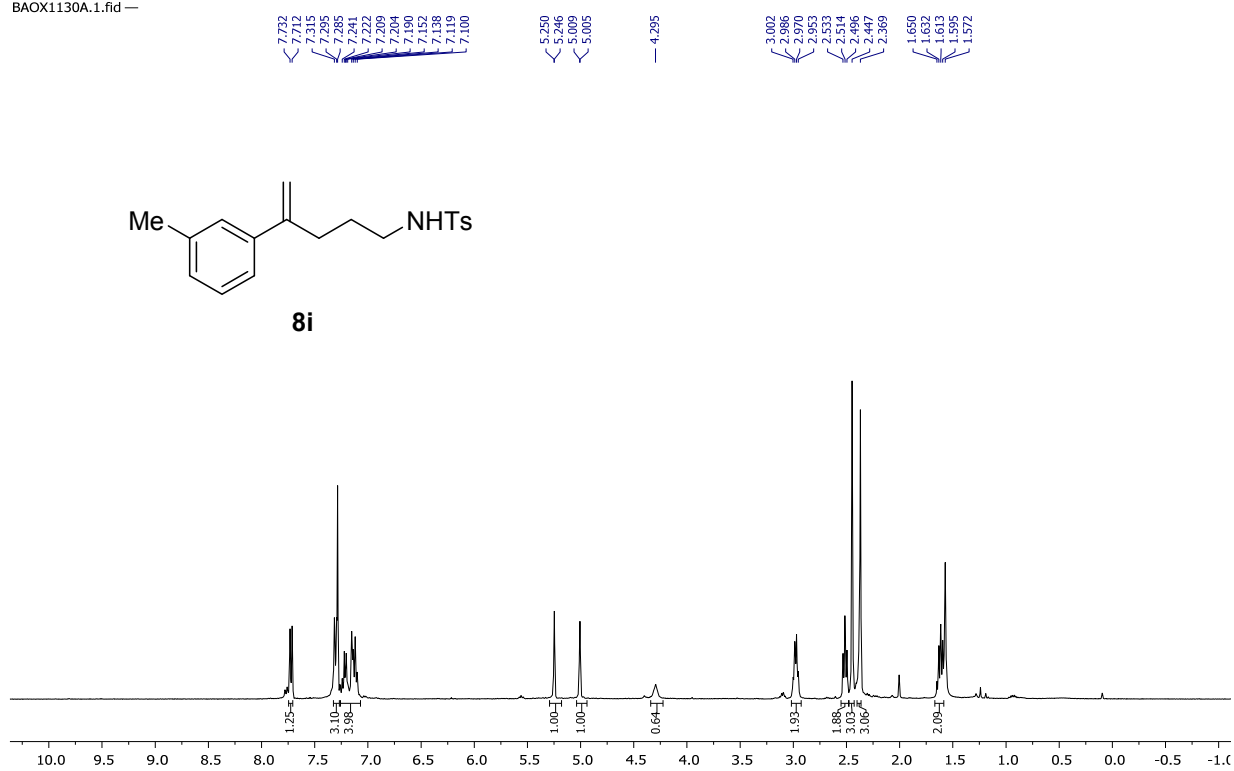

BAOX1130A.3.fid —

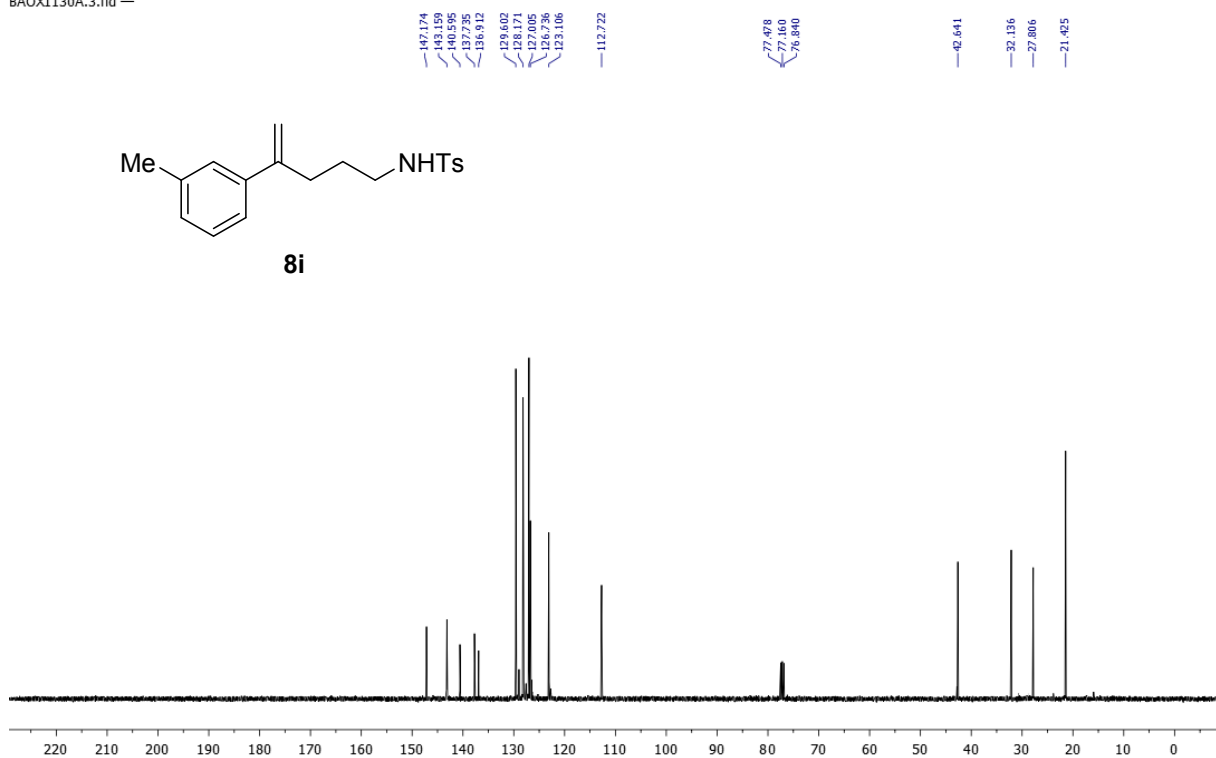

Supplementary Figure 15.  $^1\text{H}$  and  $^{13}\text{C}$  NMR spectra of **8i**



BAOX1130B.2.fid —

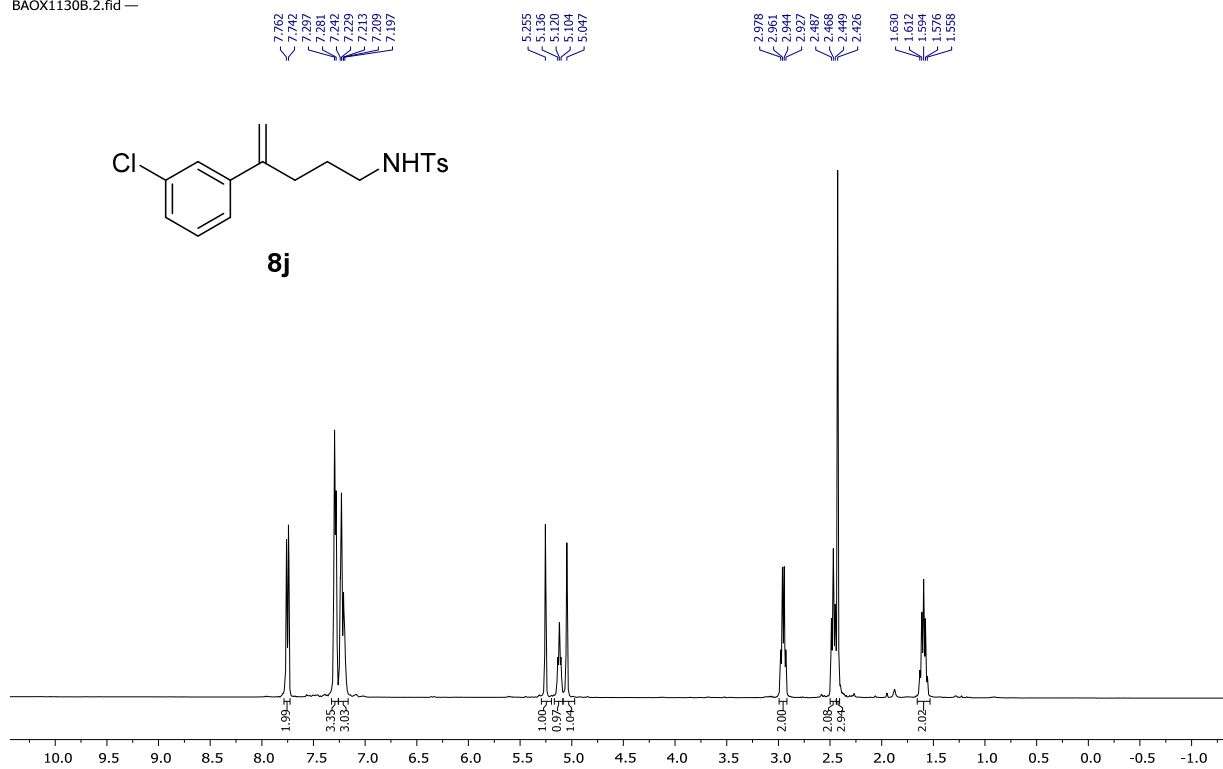

BAOX1130B.3.fid —

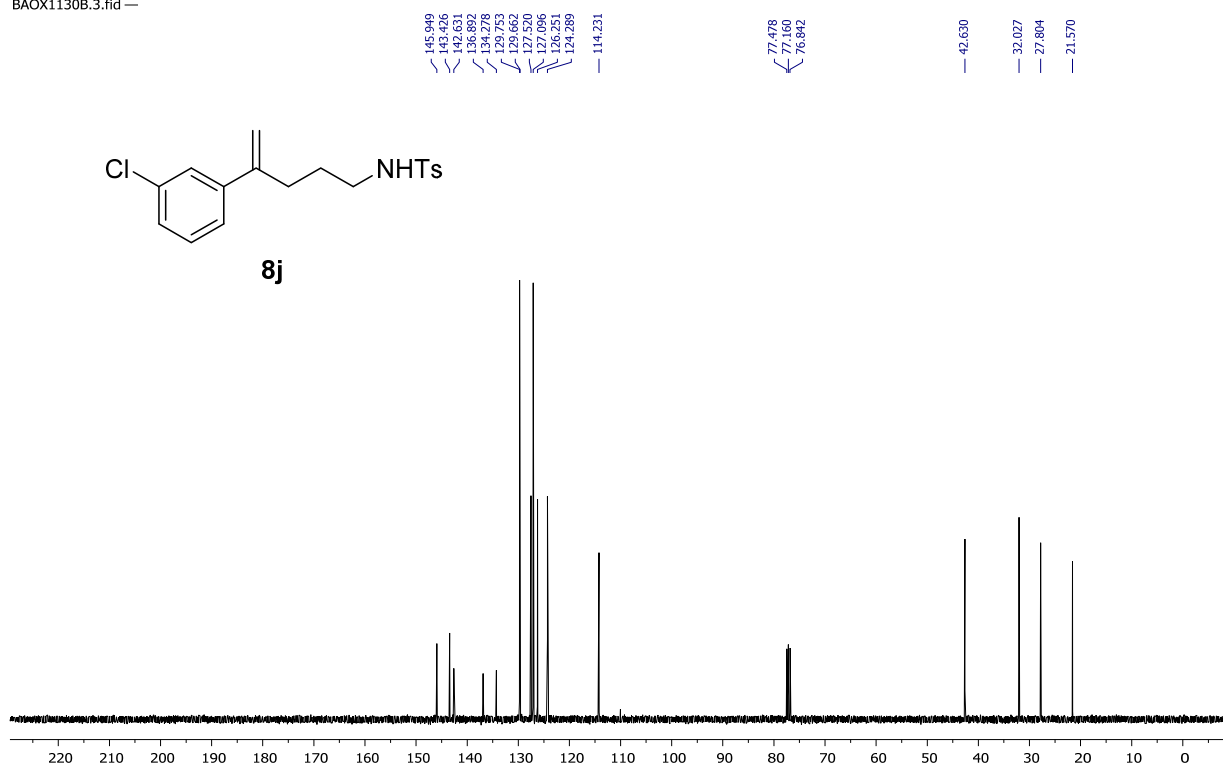

Supplementary Figure 16. <sup>1</sup>H and <sup>13</sup>C NMR spectra of **8j**

BAOX1363A.1.fid —

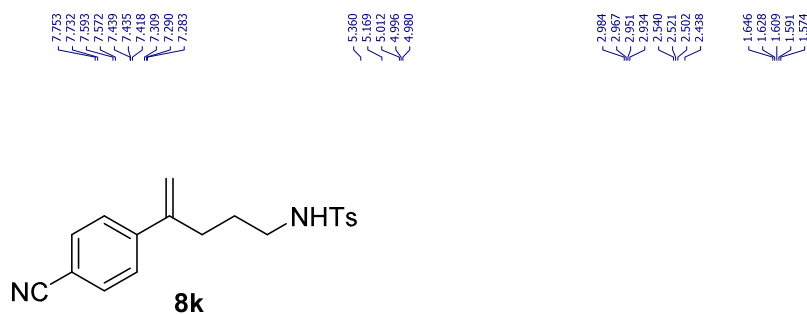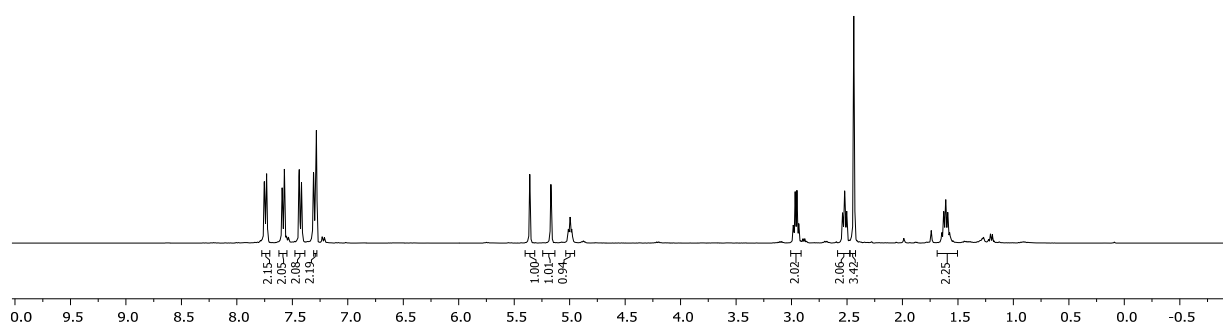

BAOX1363A.2.fid —

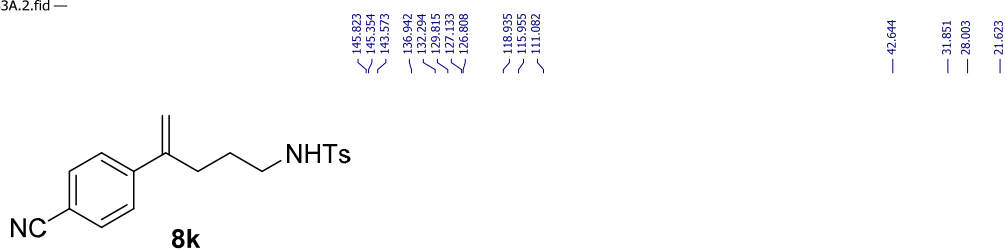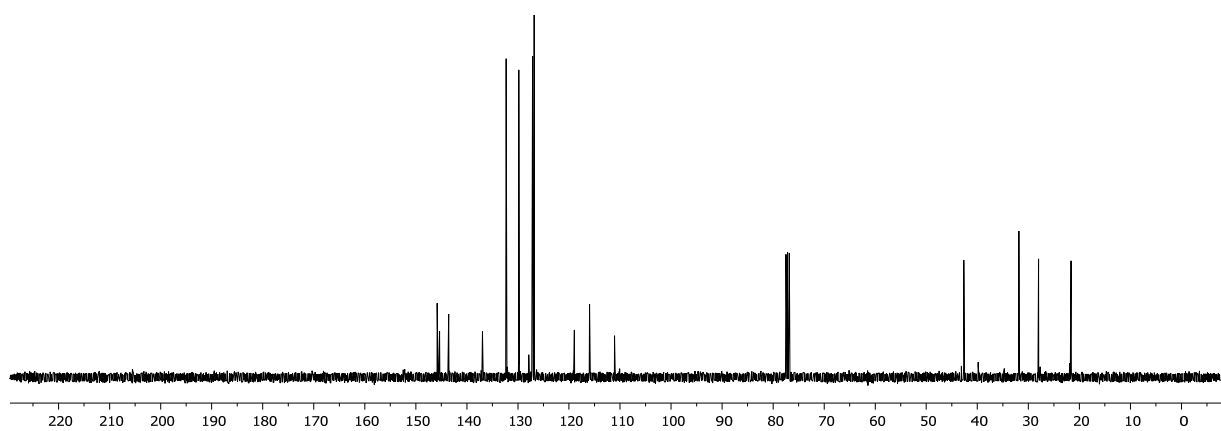

Supplementary Figure 17. <sup>1</sup>H and <sup>13</sup>C NMR spectra of **8k**

01ty071 1H product.1.fid  
ChemInfo\_1Hzg CDCl3 /opt/ yokoe

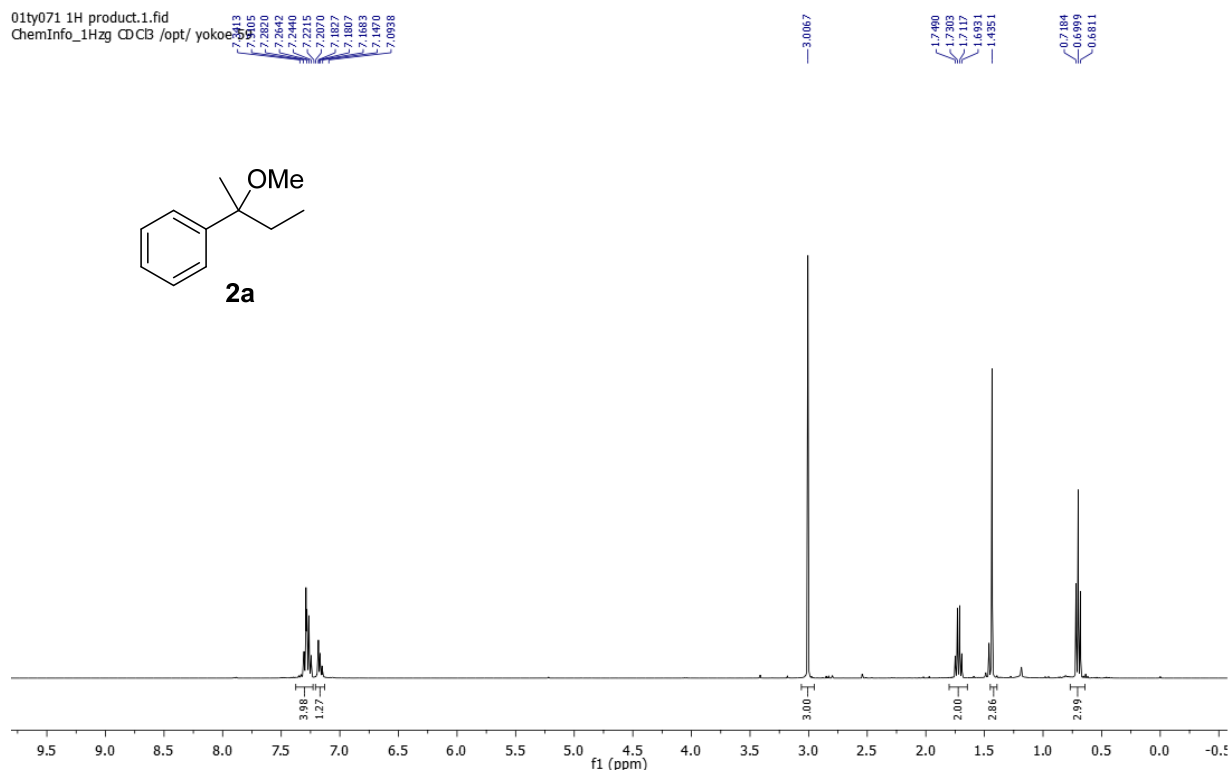

01ty071 13C product.1.fid  
ChemInfo\_13C\_cpd CDCl3 /opt/ yokoe 59

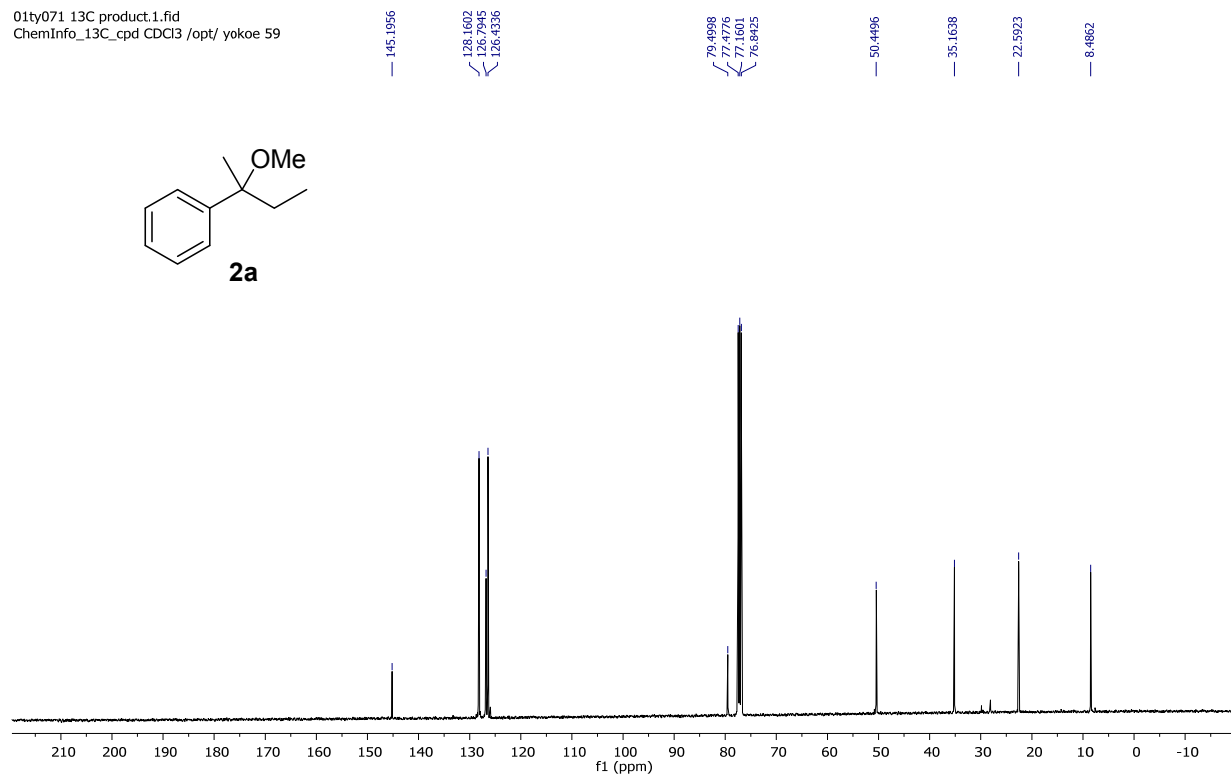

Supplementary Figure 18. <sup>1</sup>H and <sup>13</sup>C NMR spectra of 2a

01ty092 1H product.1.fid  
ChemInfo\_1Hzg CDCl3 /opt/ yokoe 59

7.187  
7.168  
7.086  
7.066

2.990

2.270

1.724  
1.715  
1.696  
1.676

1.413

0.717  
0.699  
0.680

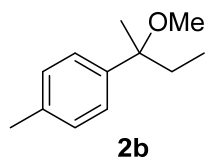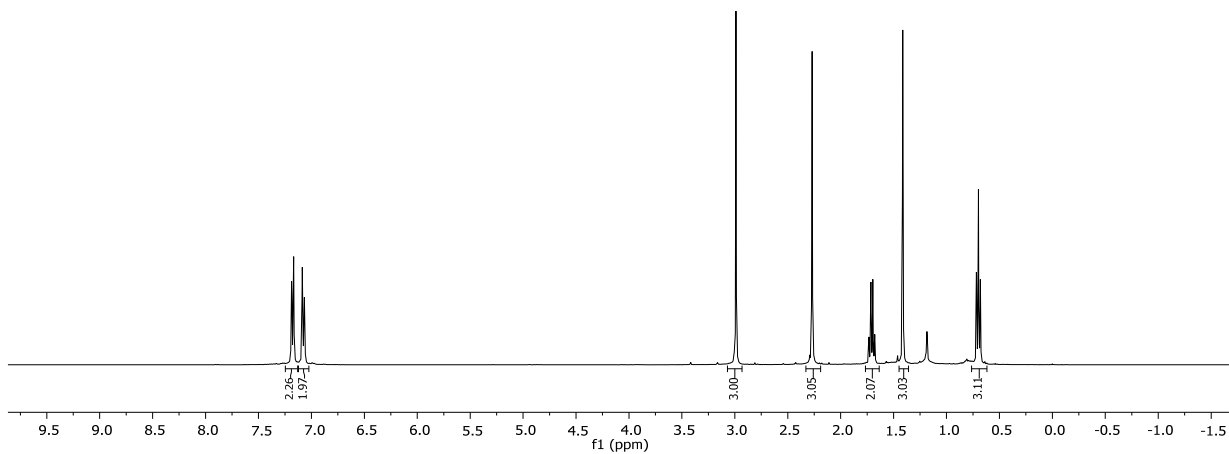

01ty092 13C product.1.fid  
ChemInfo\_13C\_qd CDCl3 /opt/ yokoe 59

142.11  
136.33  
128.88  
126.40

79.38  
77.46  
76.34

50.38

35.14

22.61  
21.14

8.53

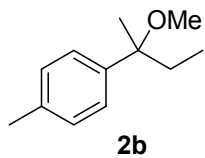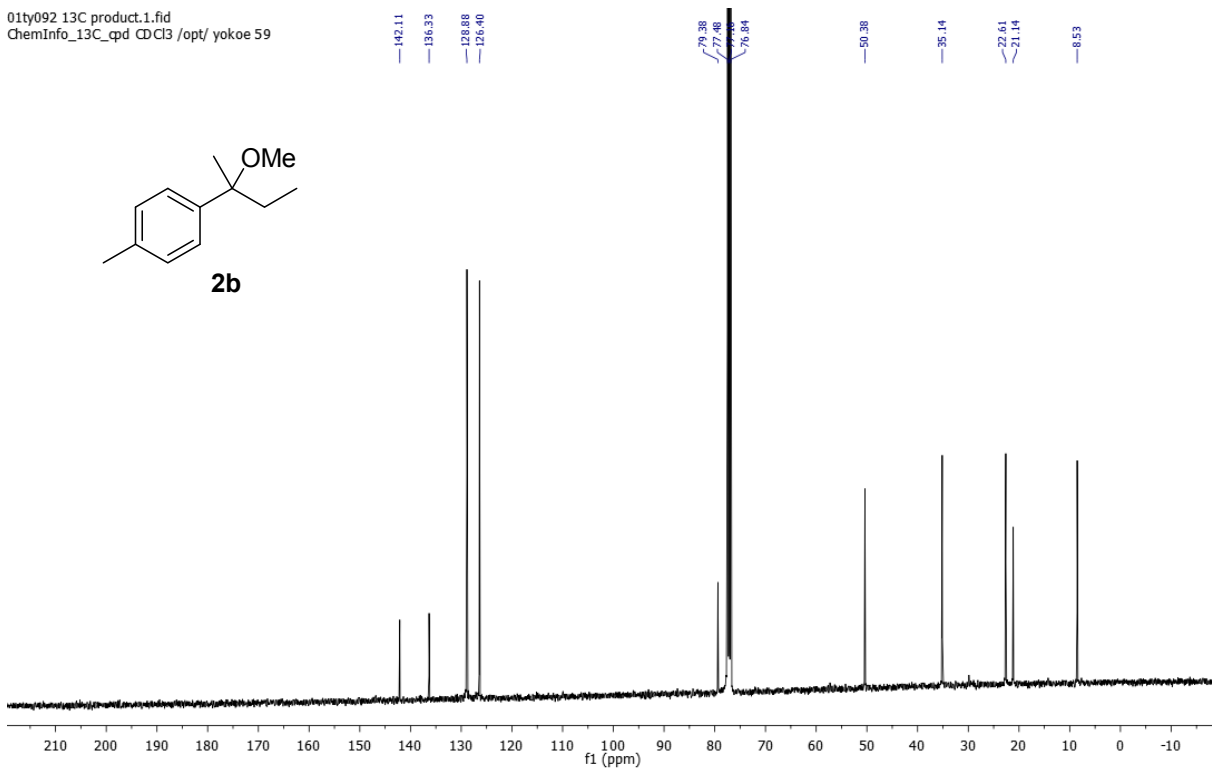

Supplementary Figure 19. <sup>1</sup>H and <sup>13</sup>C NMR spectra of 2b

01ty086 1H product.1.fid

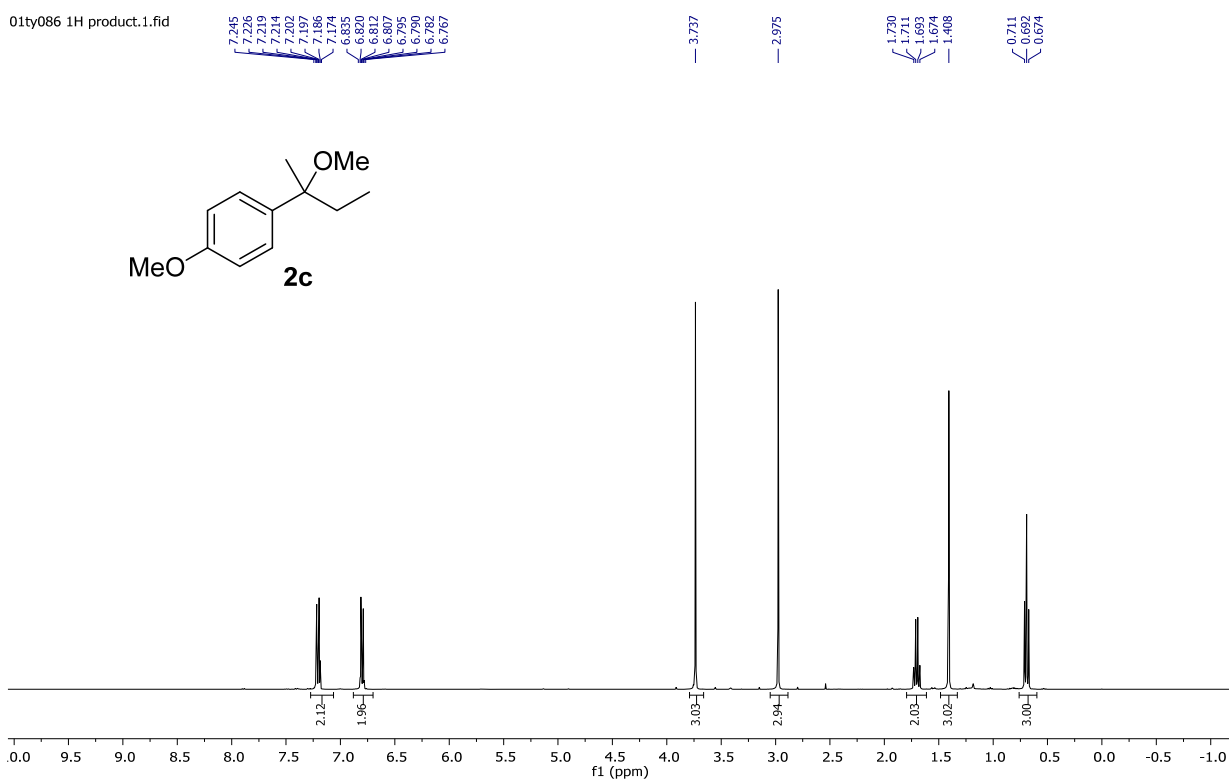

01ty086 13C product.1.fid

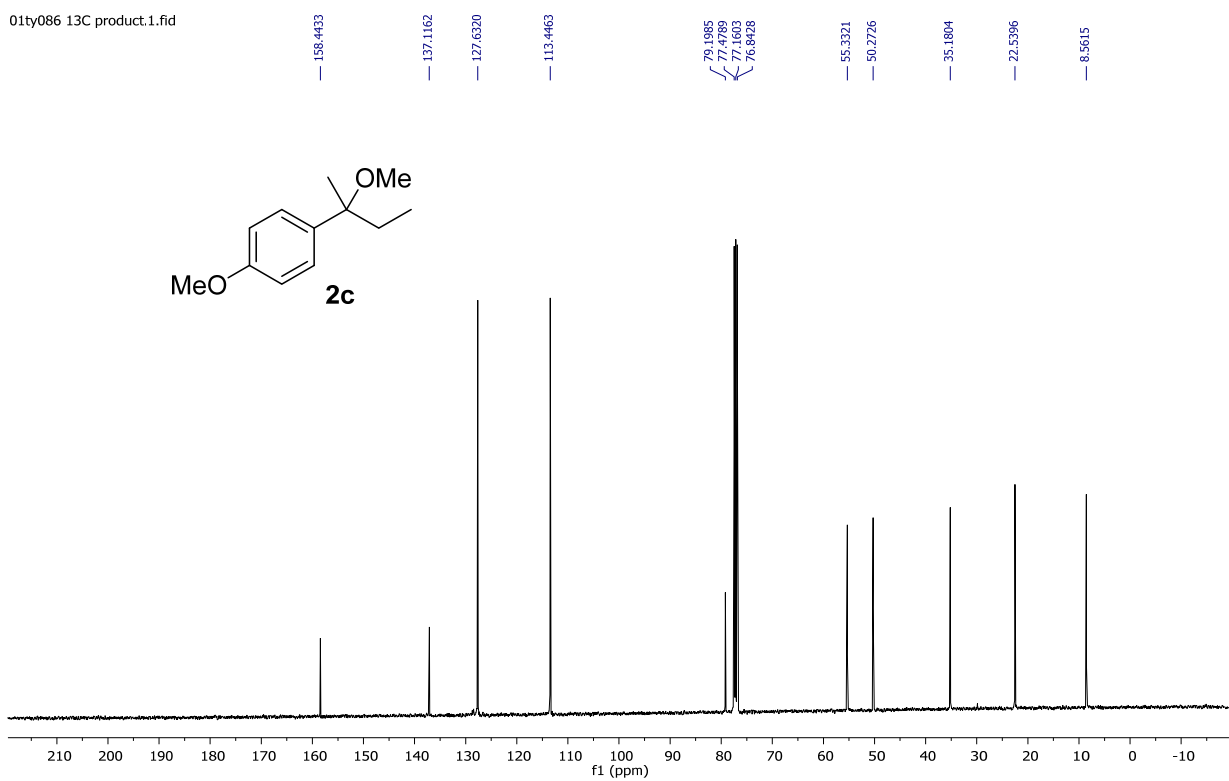

Supplementary Figure 20.  $^1\text{H}$  and  $^{13}\text{C}$  NMR spectra of **2c**

01ty106 1H.1.fid

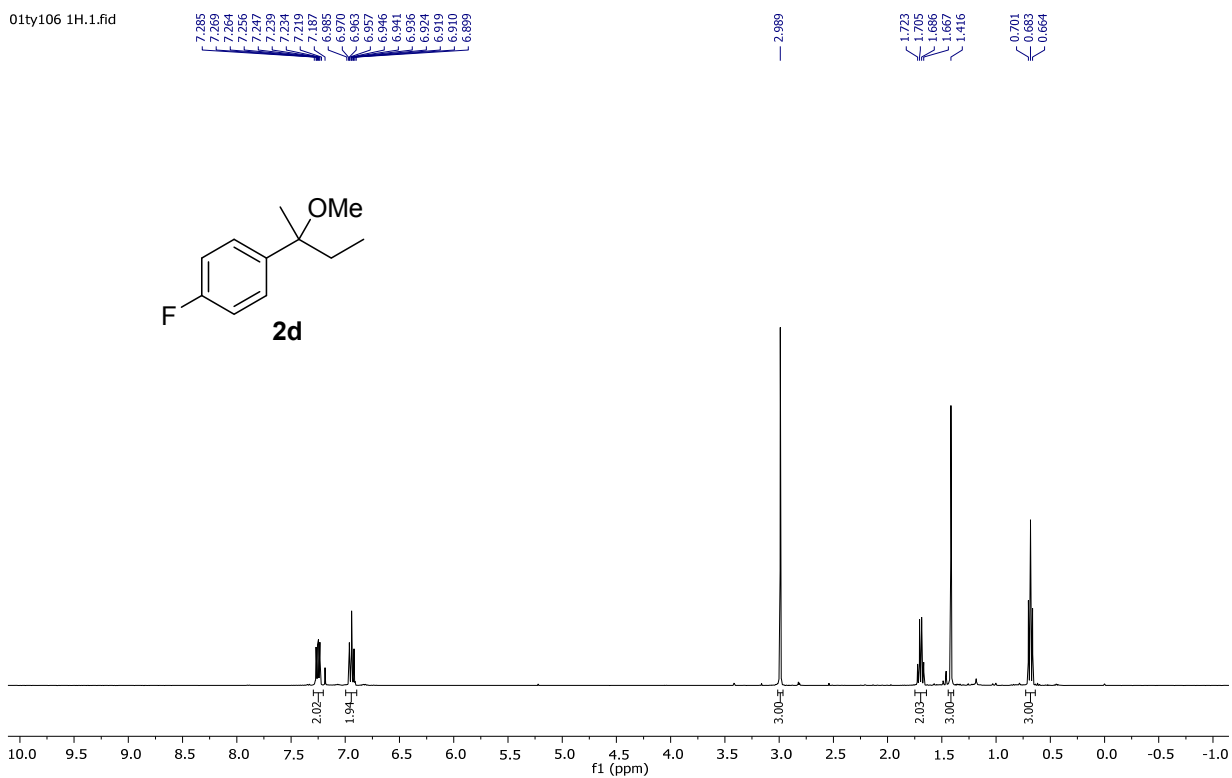

01ty106 13C.1.fid

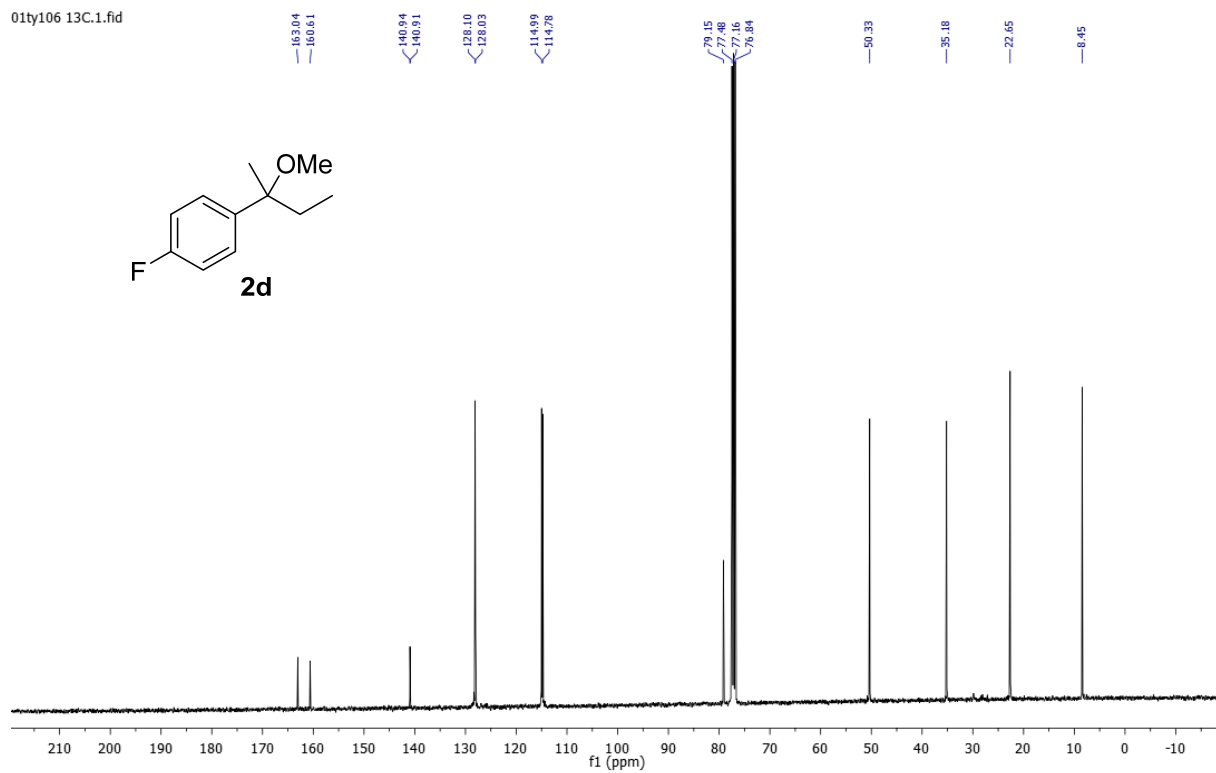

Supplementary Figure 21.  $^1\text{H}$  and  $^{13}\text{C}$  NMR spectra of 2d

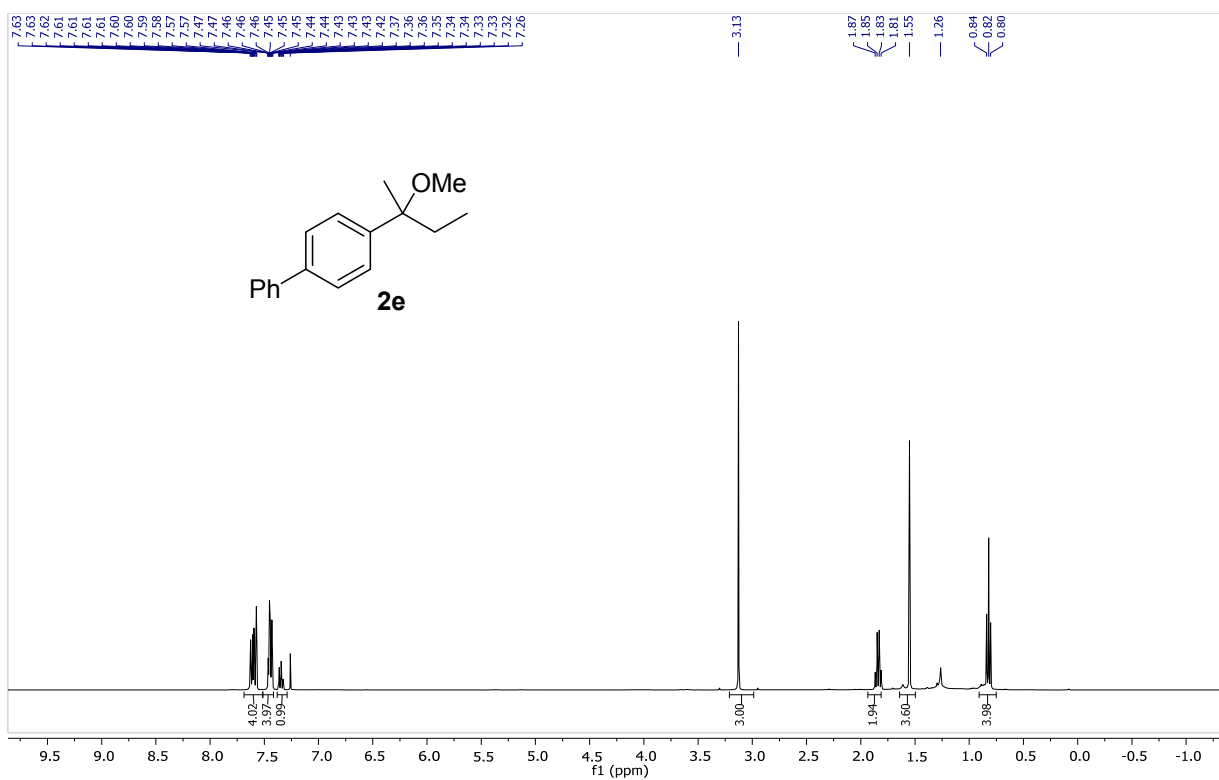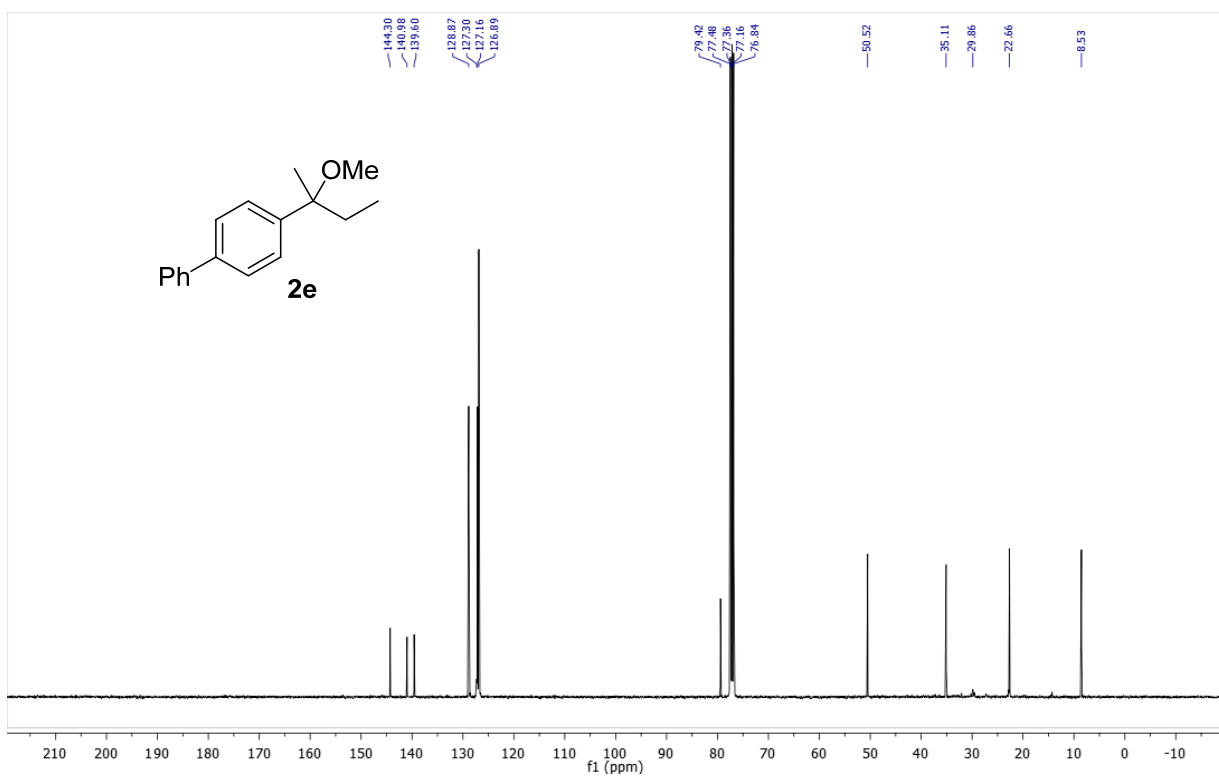

Supplementary Figure 22. <sup>1</sup>H and <sup>13</sup>C NMR spectra of 2e

BAOX1230A-2.1.fid —

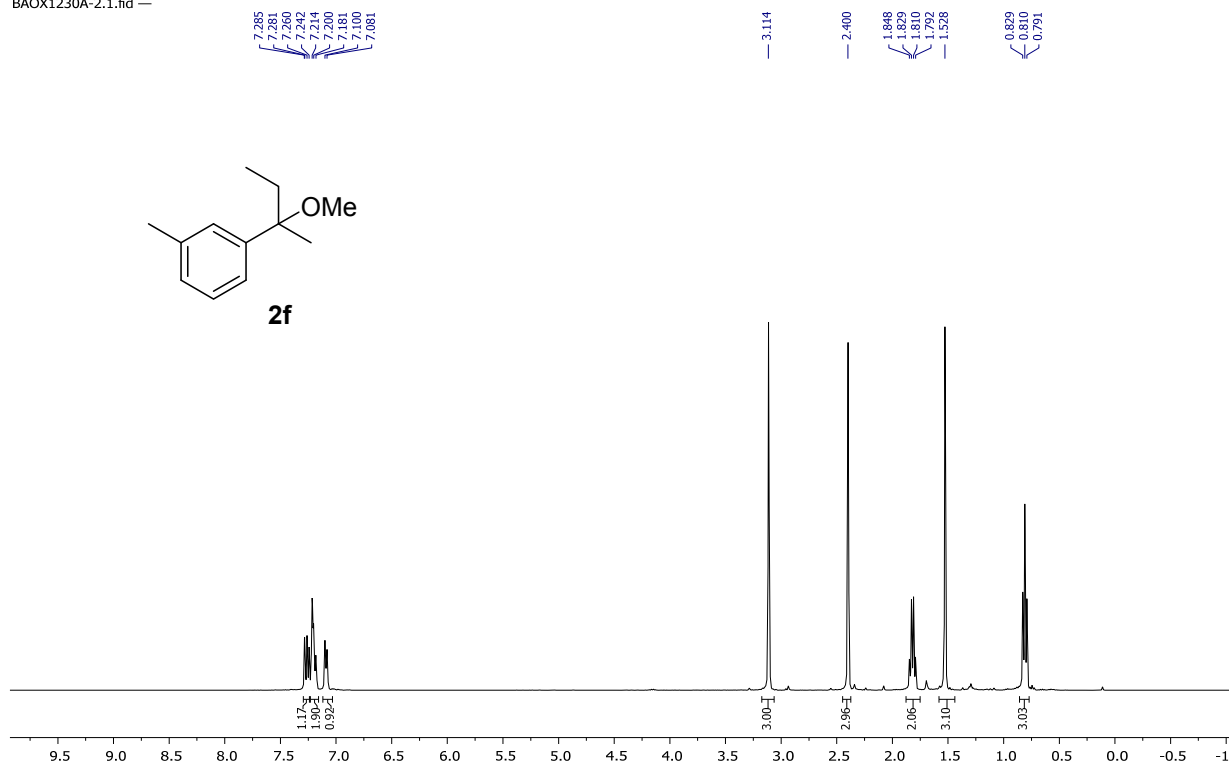

BAOX1230A-2.2.fid —

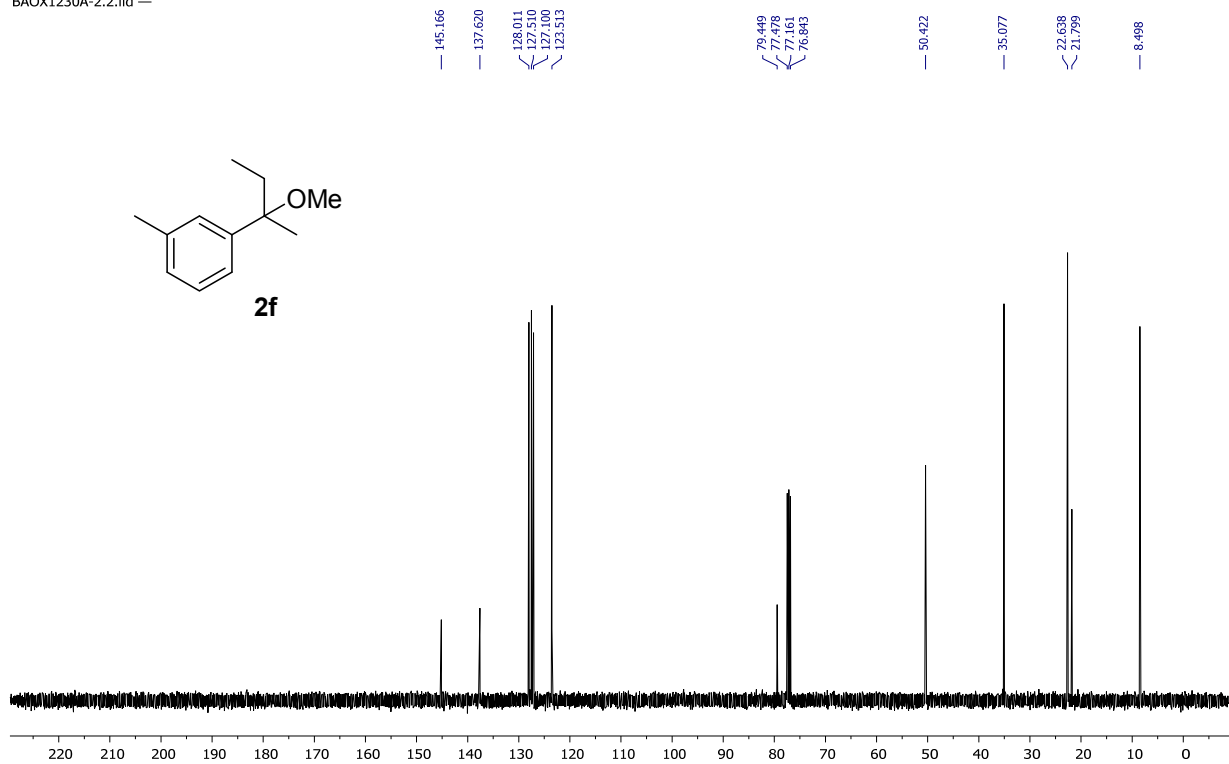

Supplementary Figure 23. <sup>1</sup>H and <sup>13</sup>C NMR spectra of **2f**



BAOX1230B.1.fid —

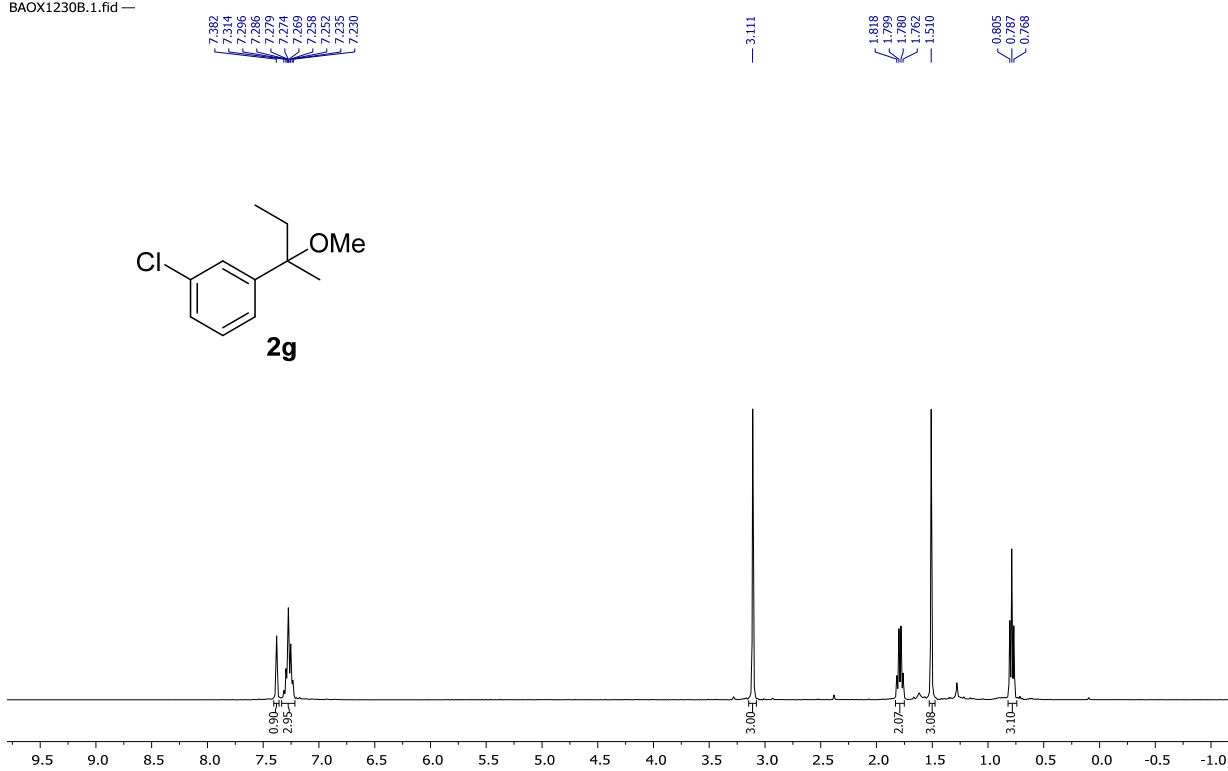

BAOX1230B.2.fid —

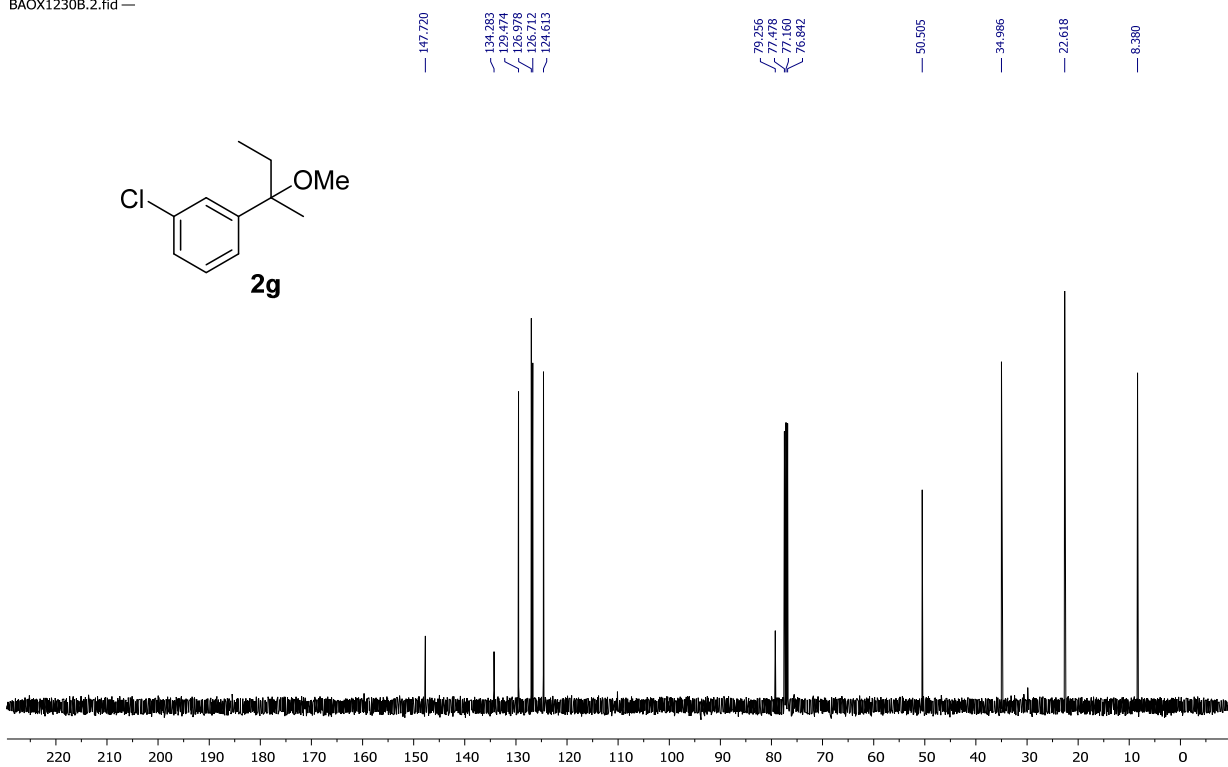

Supplementary Figure 24. <sup>1</sup>H and <sup>13</sup>C NMR spectra of 2g

BAOX1232B.1.fid

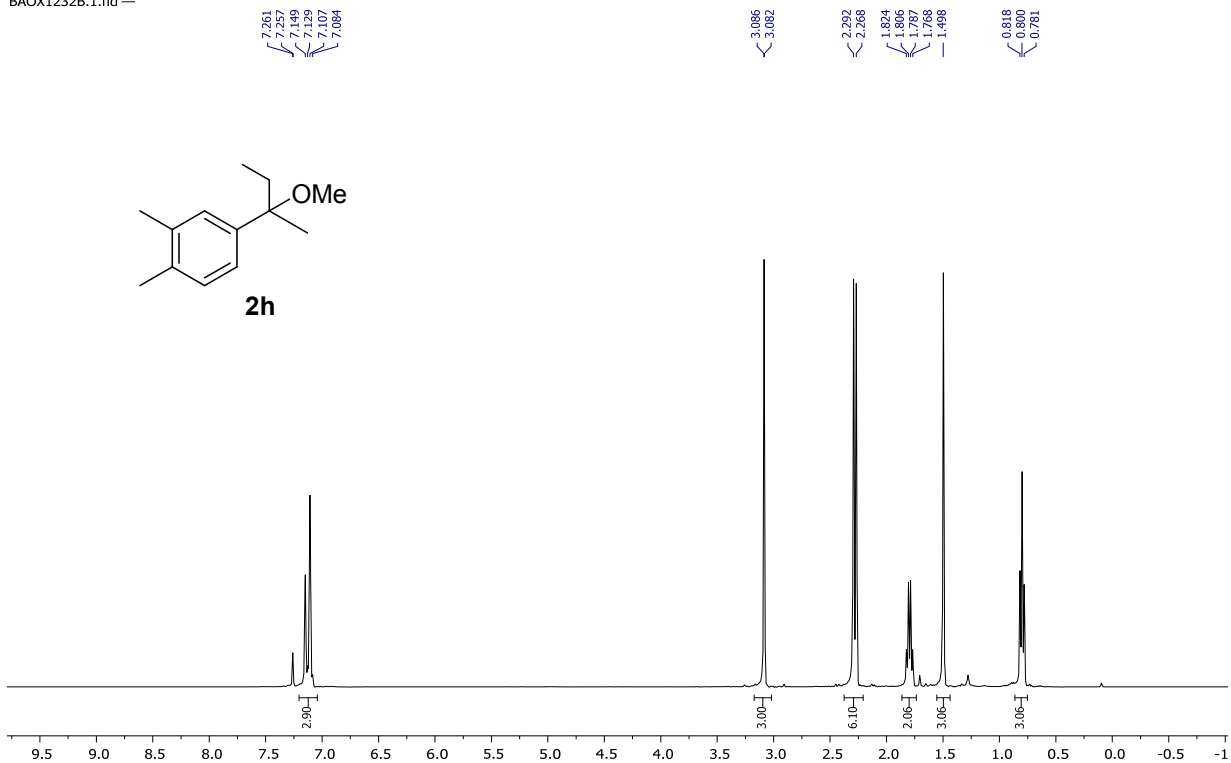

BAOX1232B.2.fid

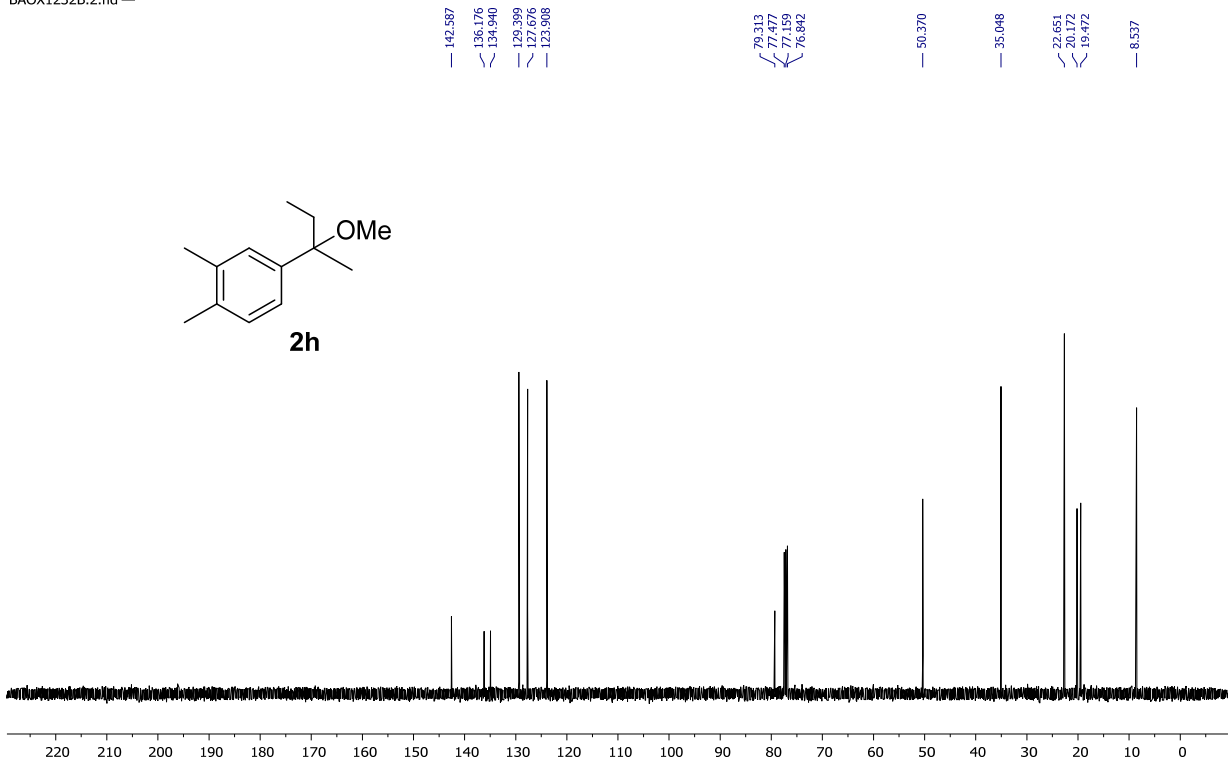

Supplementary Figure 25. <sup>1</sup>H and <sup>13</sup>C NMR spectra of **2h**

BAOX1232C.1.fid —

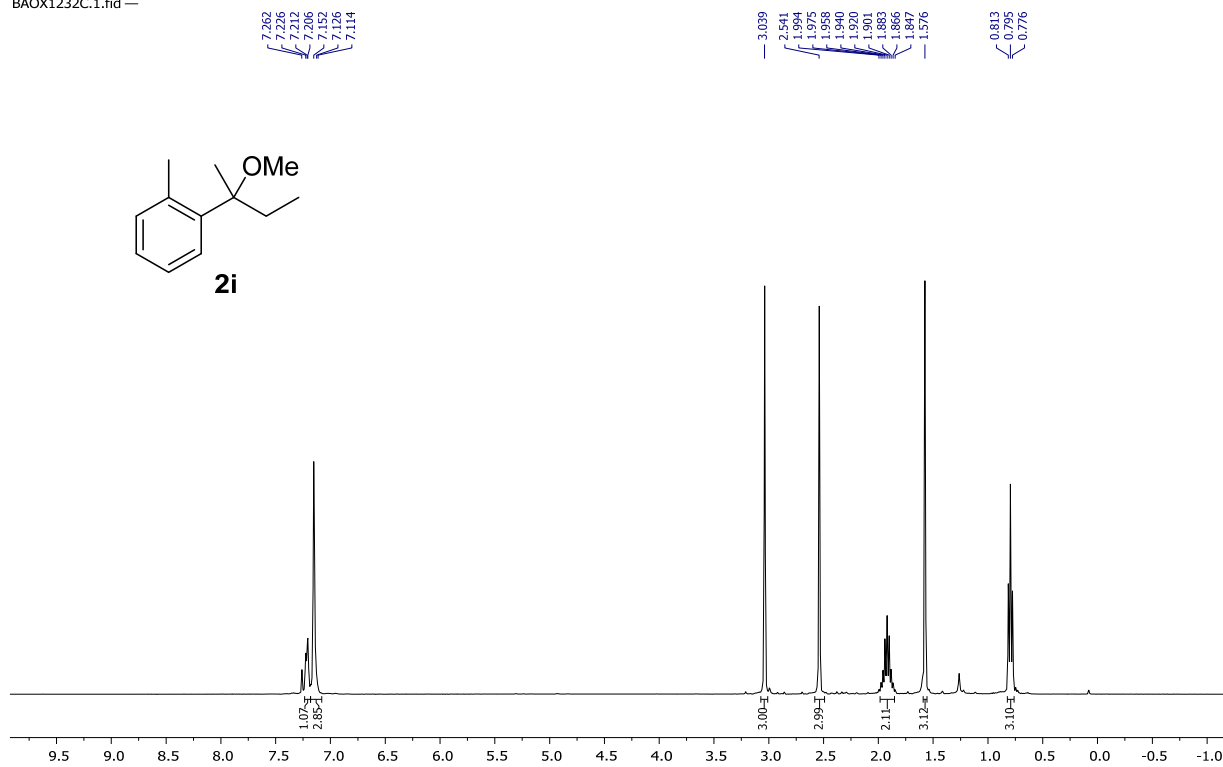

BAOX1232C.2.fid —

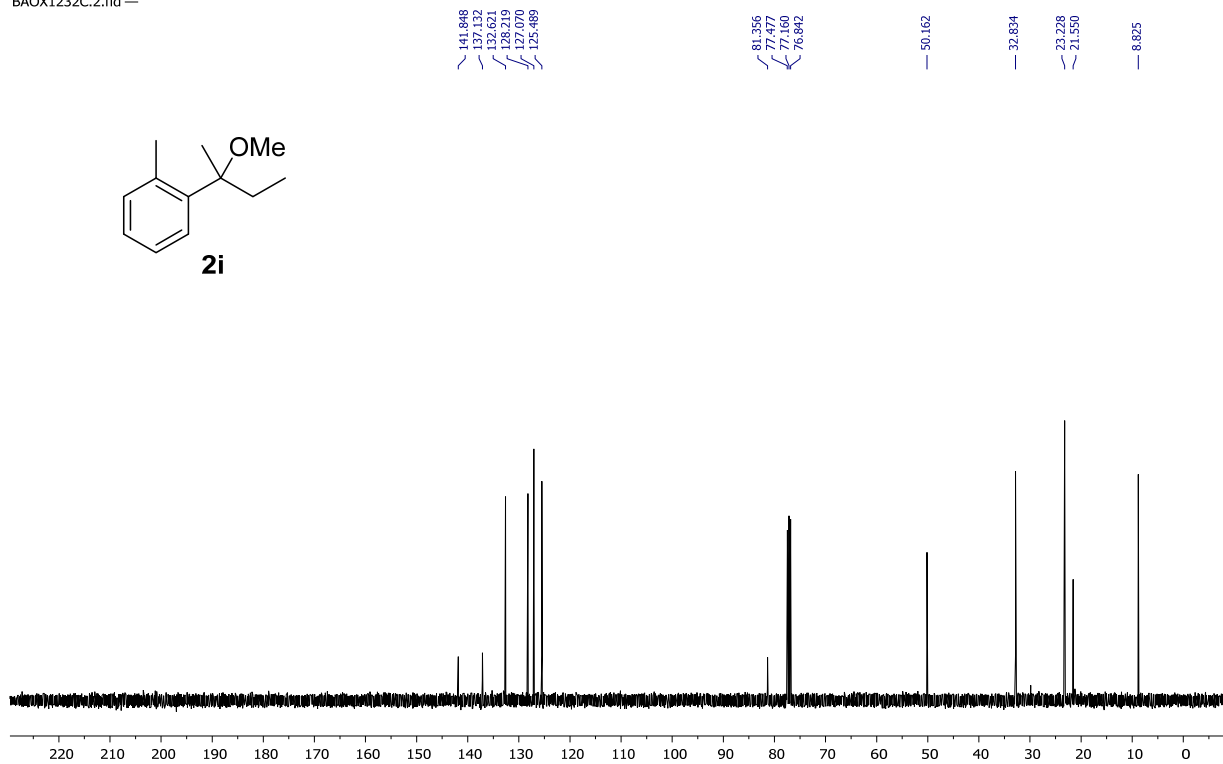

Supplementary Figure 26. <sup>1</sup>H and <sup>13</sup>C NMR spectra of **2i**

01ty076 1H.1.fid

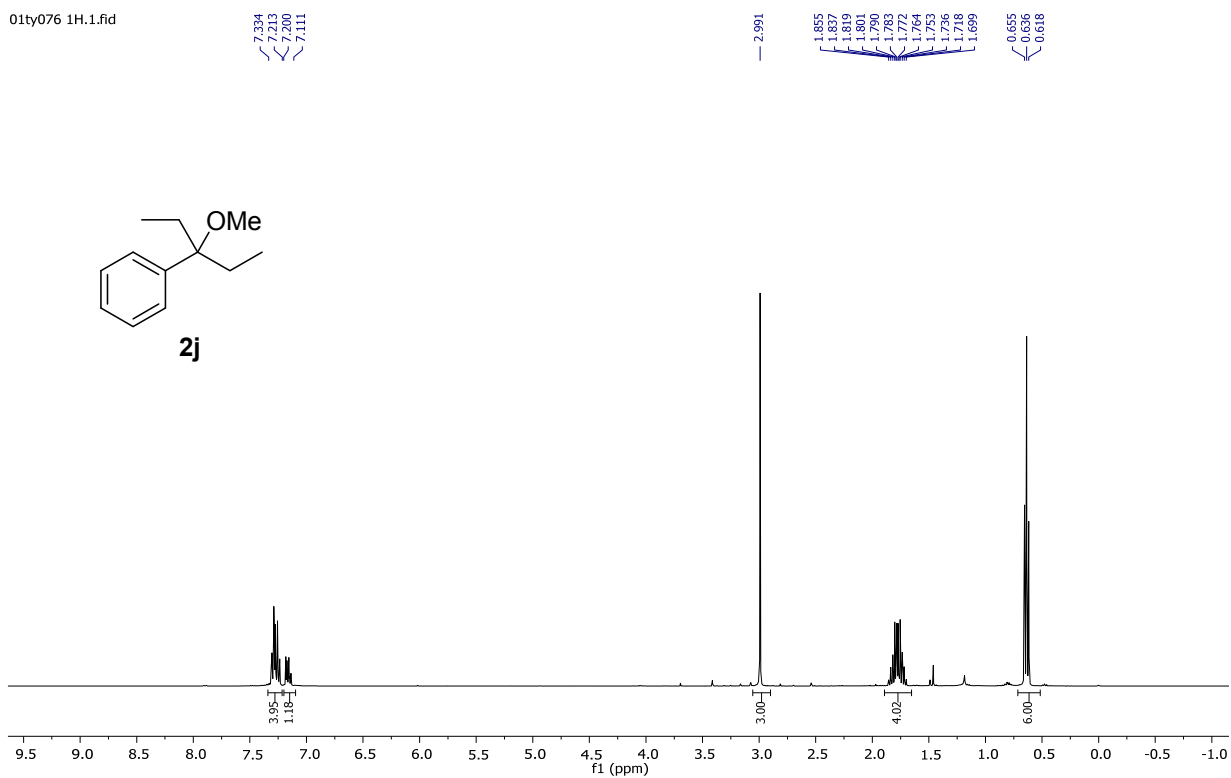

01ty076 13C.1.fid

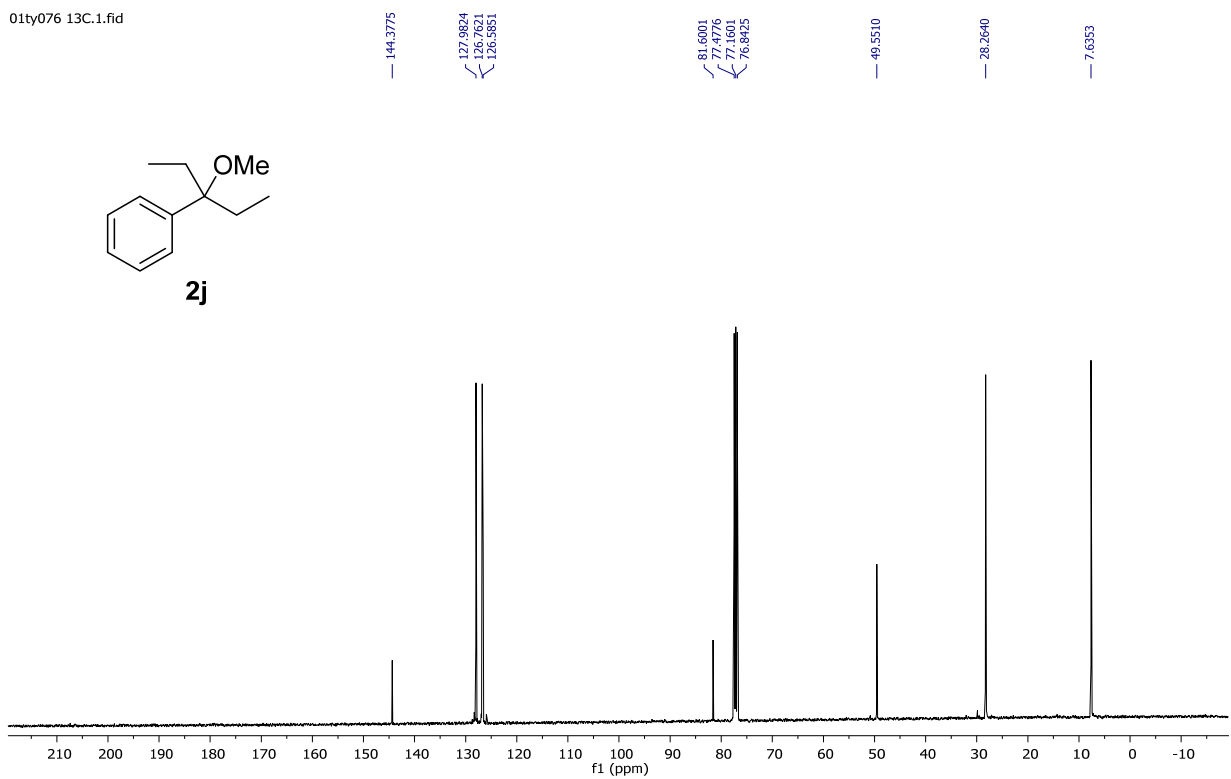

Supplementary Figure 27. <sup>1</sup>H and <sup>13</sup>C NMR spectra of 2j

01ty098 1H product.1.fid

7.2854  
7.2672  
7.2496  
7.1767  
7.1582  
7.0749

3.0736  
2.1596  
2.1101  
2.0919  
2.0772  
2.0707  
2.0604  
2.0522  
2.0347  
2.0344  
2.0170  
1.9801  
1.9375  
1.9090  
1.8912  
1.8730  
1.8548  
1.8365  
1.8182  
1.7997  
0.8459  
0.8279  
0.8109  
0.7167  
0.6884  
0.6435  
0.5703

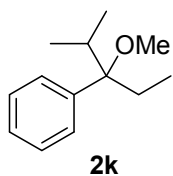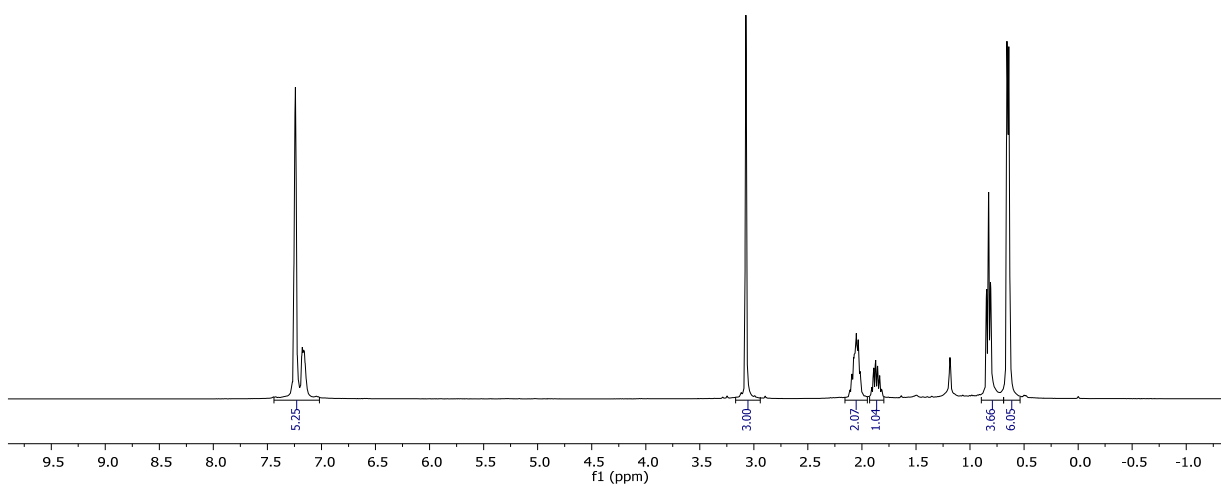

01ty098 13C product.1.fid

140.87

128.10  
127.36  
126.97

83.83  
77.48  
77.16  
76.84

49.86

33.47

24.43

18.09  
16.91

7.26

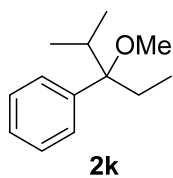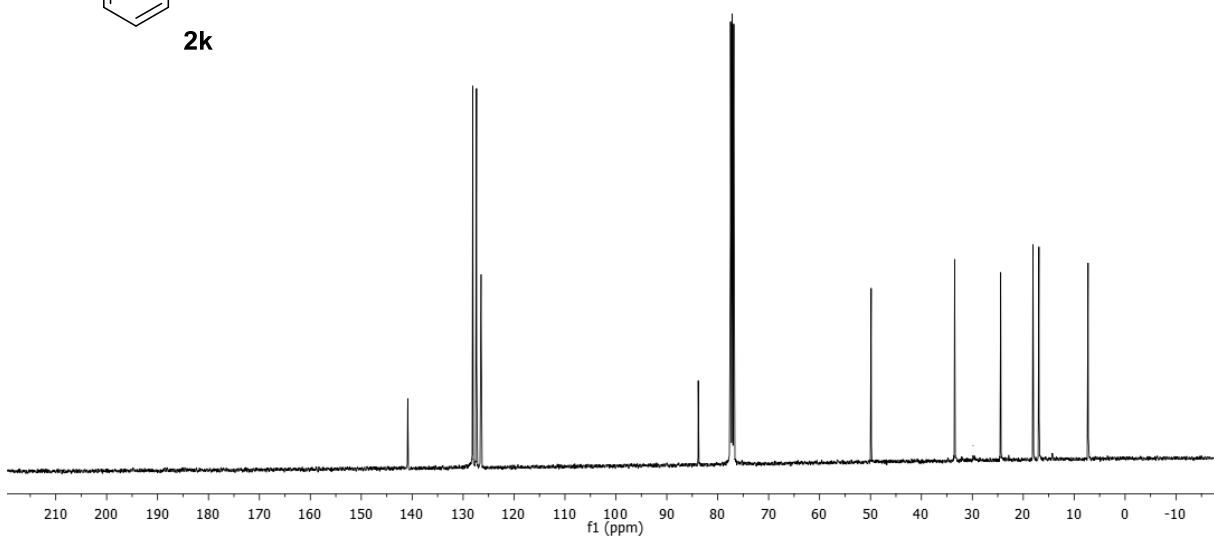

Supplementary Figure 28. <sup>1</sup>H and <sup>13</sup>C NMR spectra of 2k

BAOX1230K.1.fid —

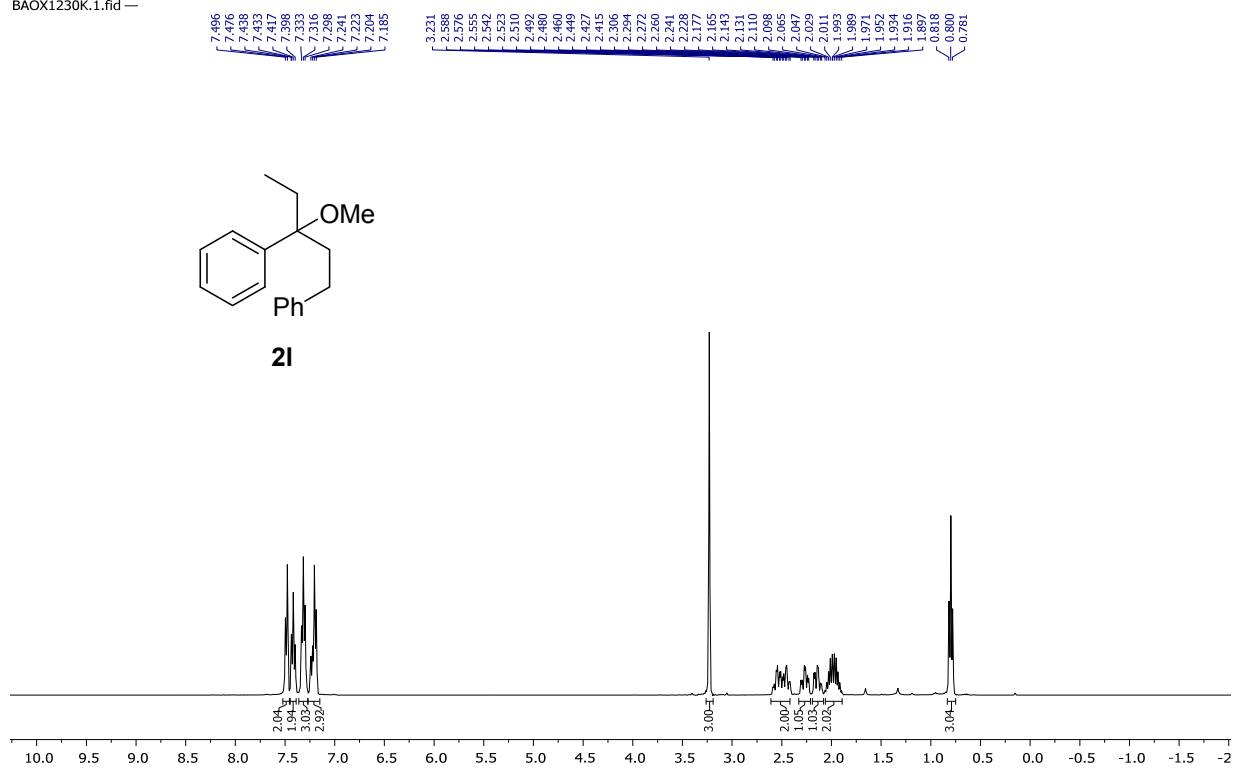

BAOX1230K.2.fid —

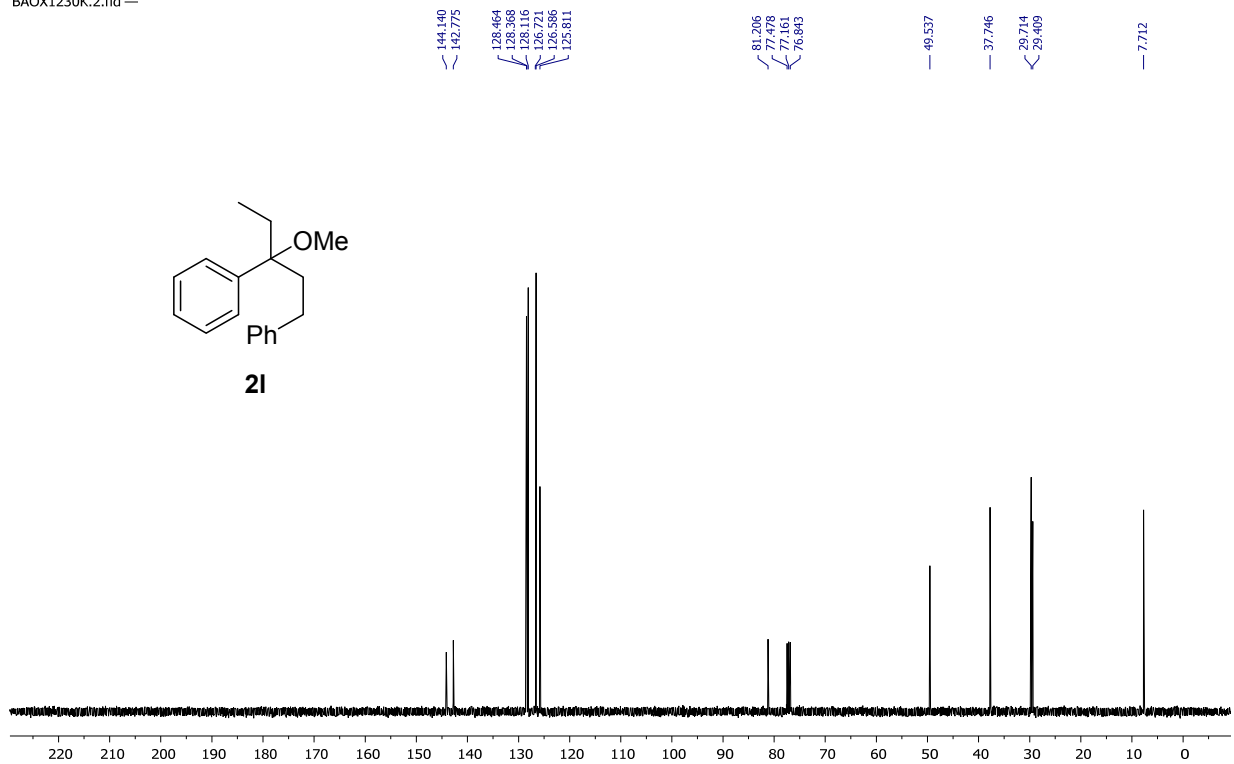

Supplementary Figure 29. <sup>1</sup>H and <sup>13</sup>C NMR spectra of **2I**

BAOX1230I.1.fid —

7.432  
7.427  
7.412  
7.357  
7.353  
7.339  
7.319  
7.287  
7.263  
7.249  
7.245  
7.231  
7.227

3.113

2.423  
2.406  
2.388

0.812  
0.794  
0.776

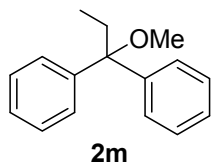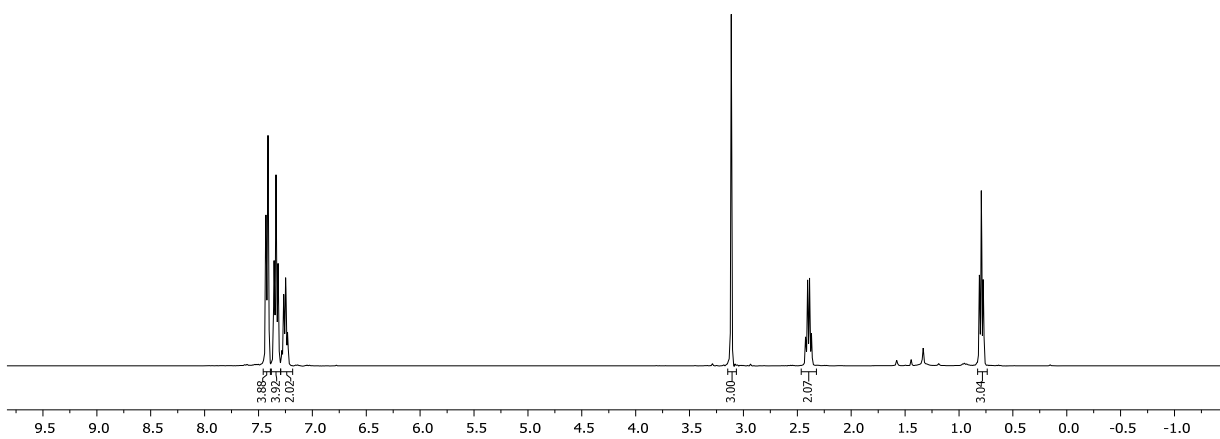

BAOX1230I.2.fid —

145.623

127.930  
127.164  
126.628

82.735  
77.477  
77.159  
76.841

49.993

27.700

7.352

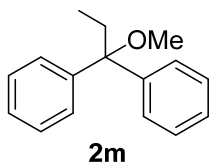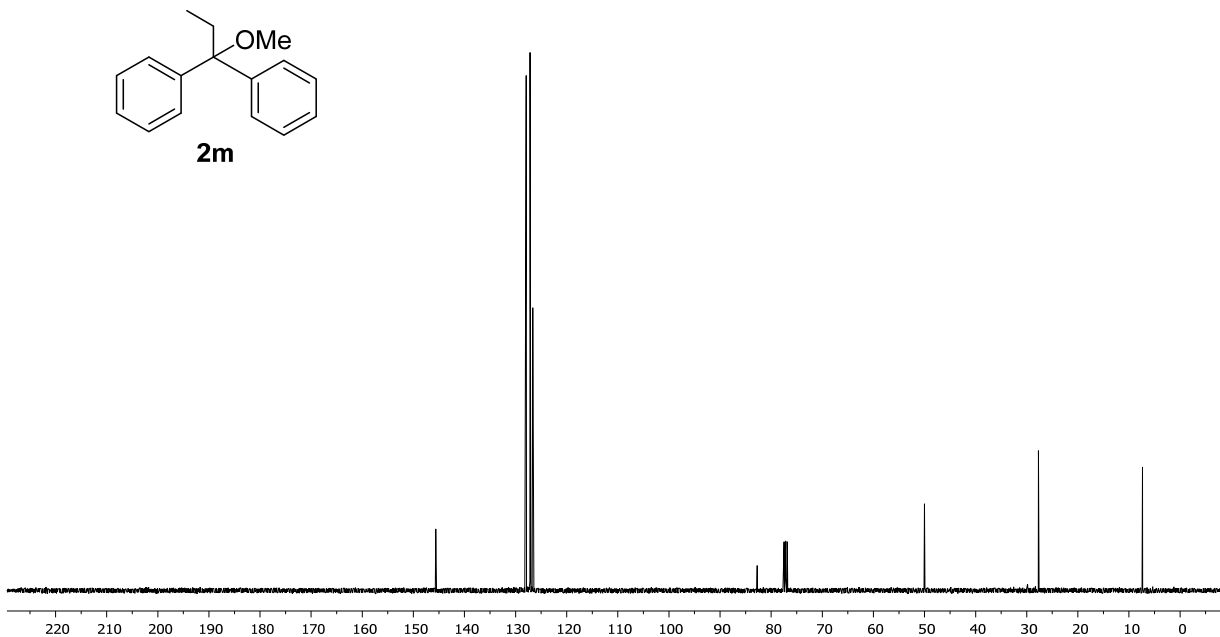

Supplementary Figure 30.  $^1\text{H}$  and  $^{13}\text{C}$  NMR spectra of **2m**

BAOX1230F.1.fid —

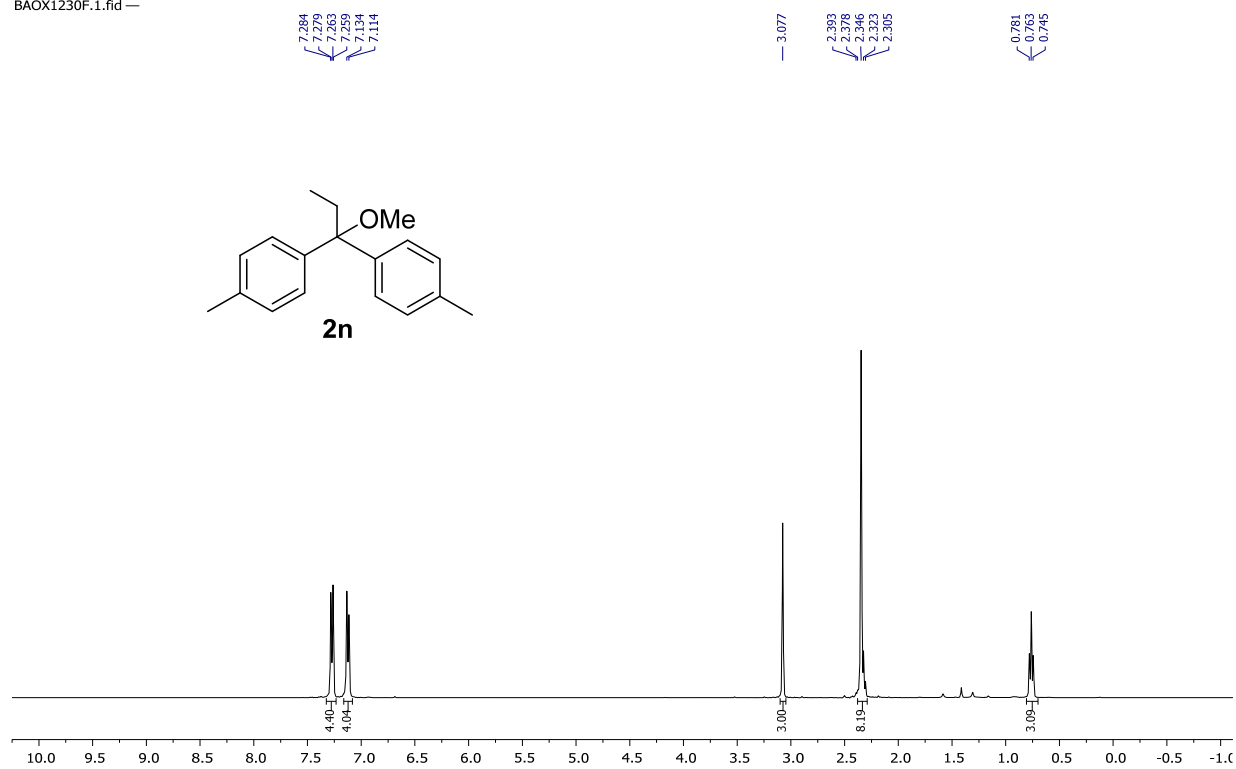

BAOX1230F.2.fid —

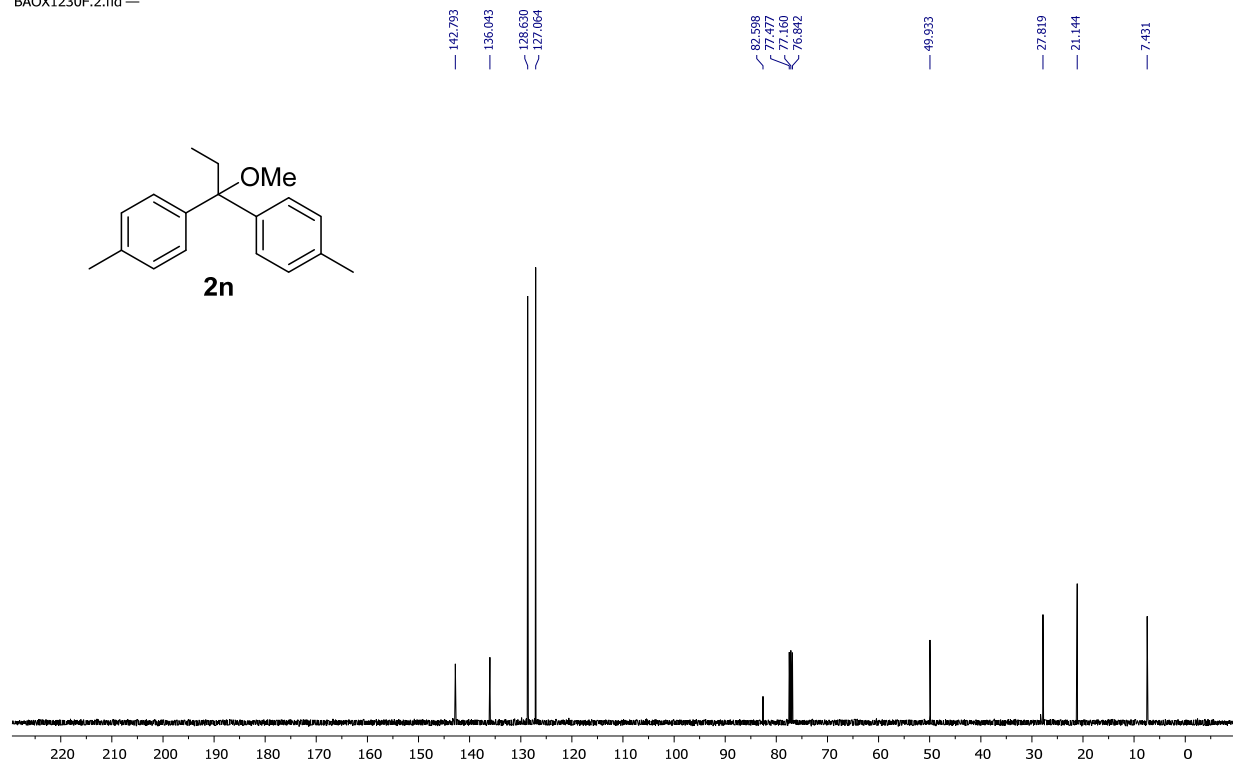

Supplementary Figure 31.  $^1\text{H}$  and  $^{13}\text{C}$  NMR spectra of **2n**



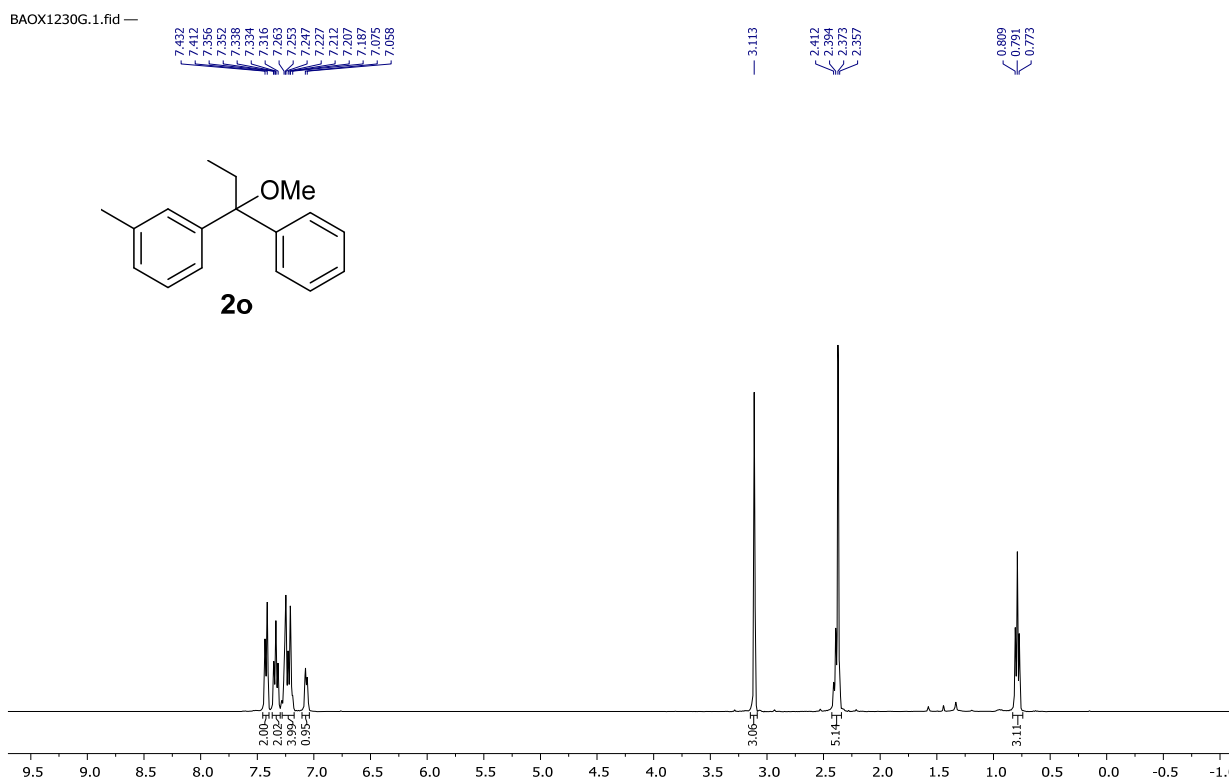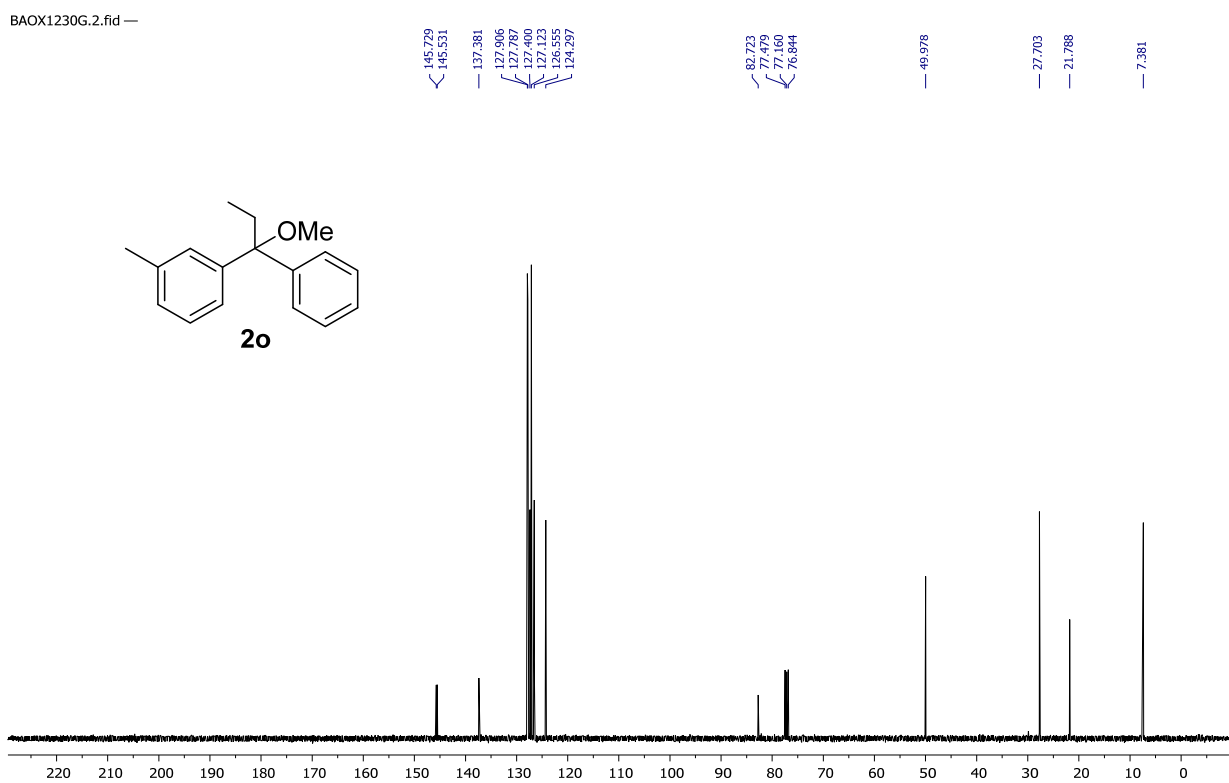

Supplementary Figure 32.  $^1\text{H}$  and  $^{13}\text{C}$  NMR spectra of **2o**

BAOX1230H.4.fid —

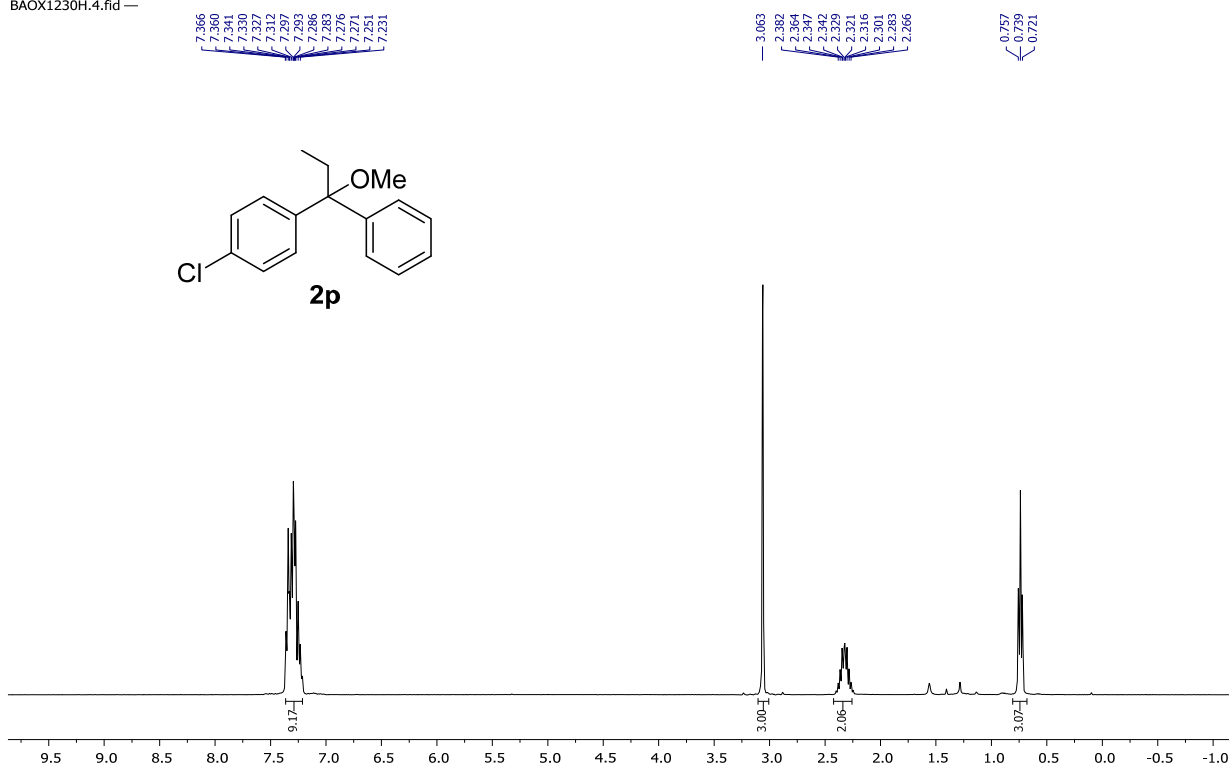

BAOX1230H.2.fid —

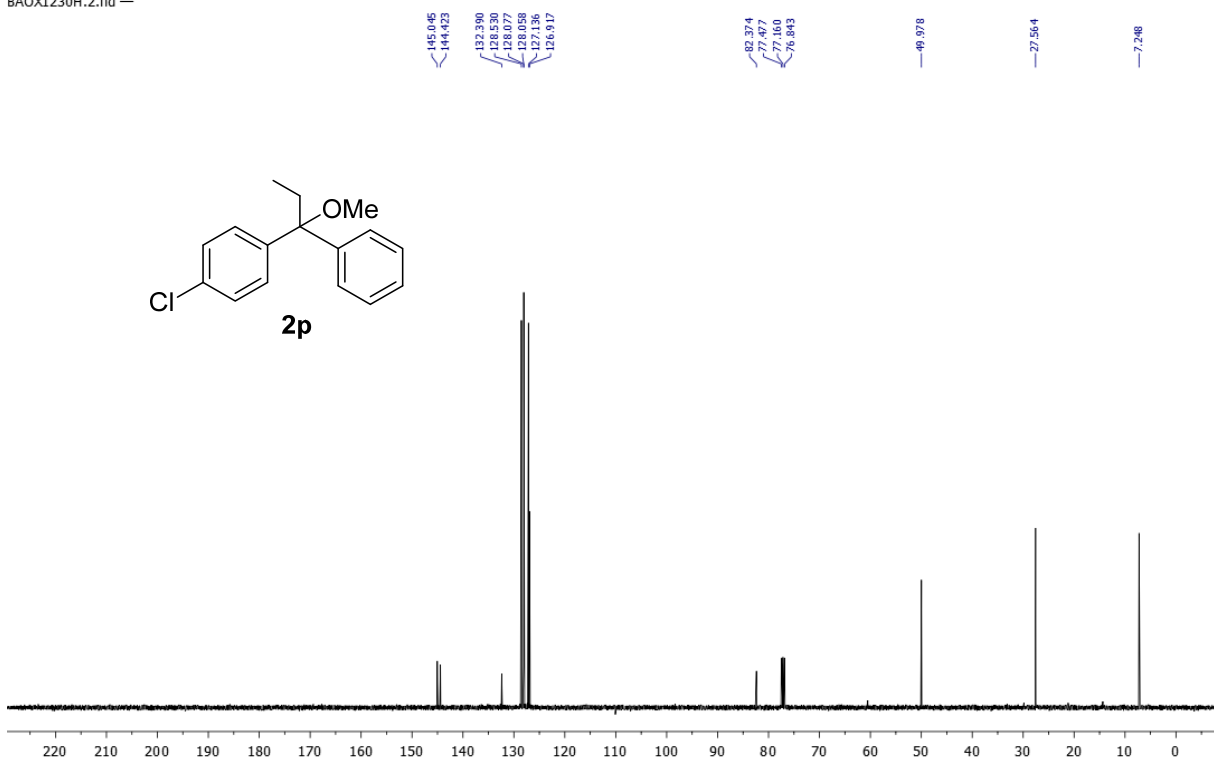

Supplementary Figure 33. <sup>1</sup>H and <sup>13</sup>C NMR spectra of 2p

BAOX1230J.1.fid —

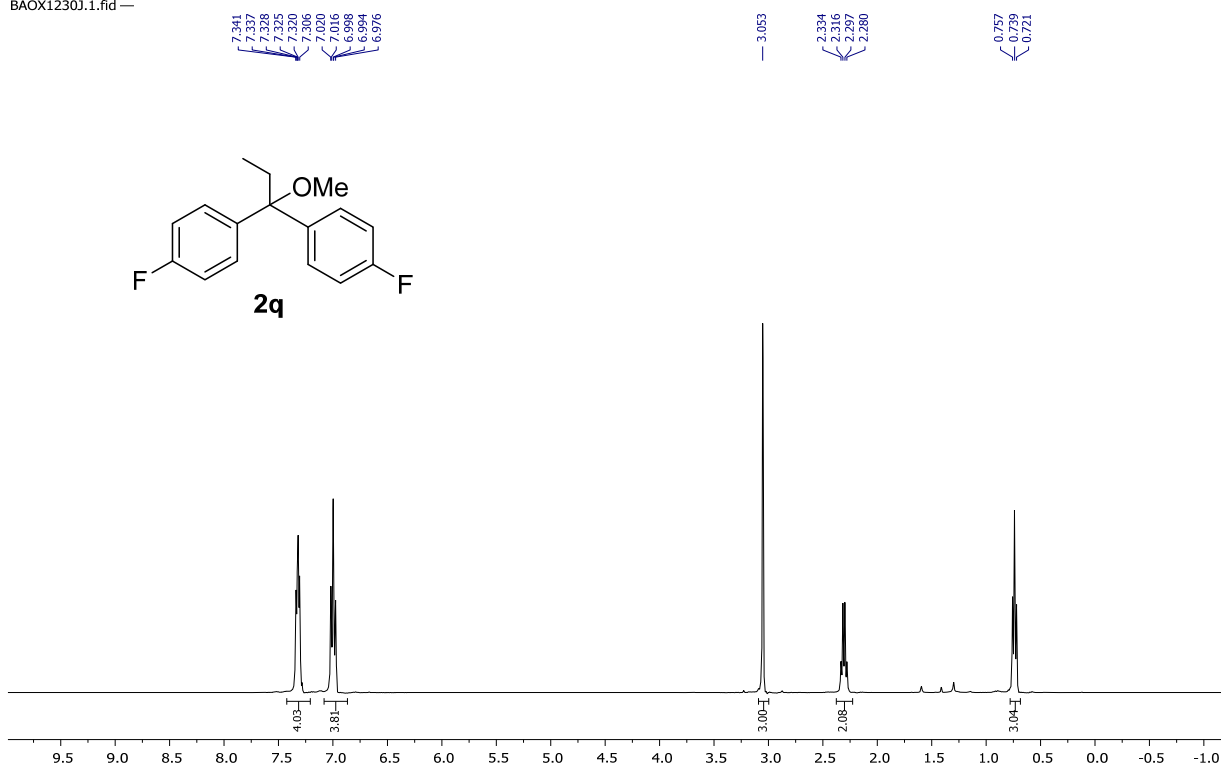

BAOX1230J.2.fid —

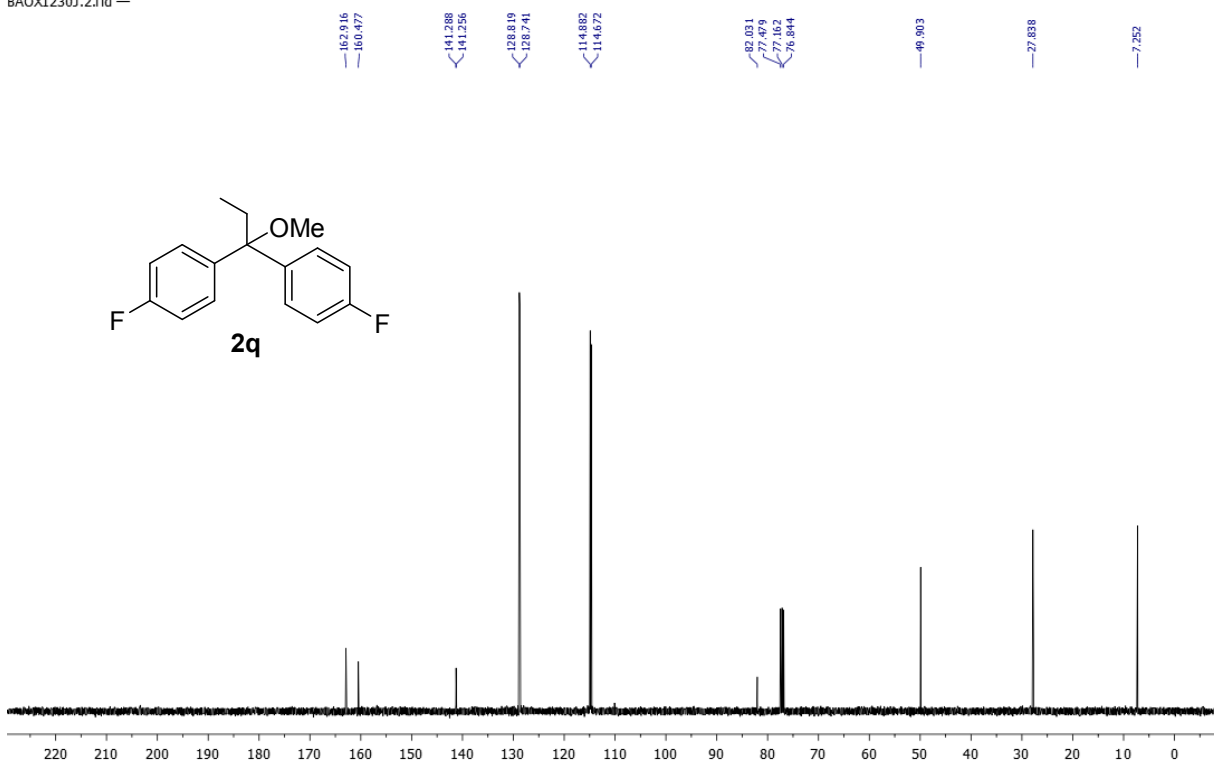

Supplementary Figure 34. <sup>1</sup>H and <sup>13</sup>C NMR spectra of **2q**

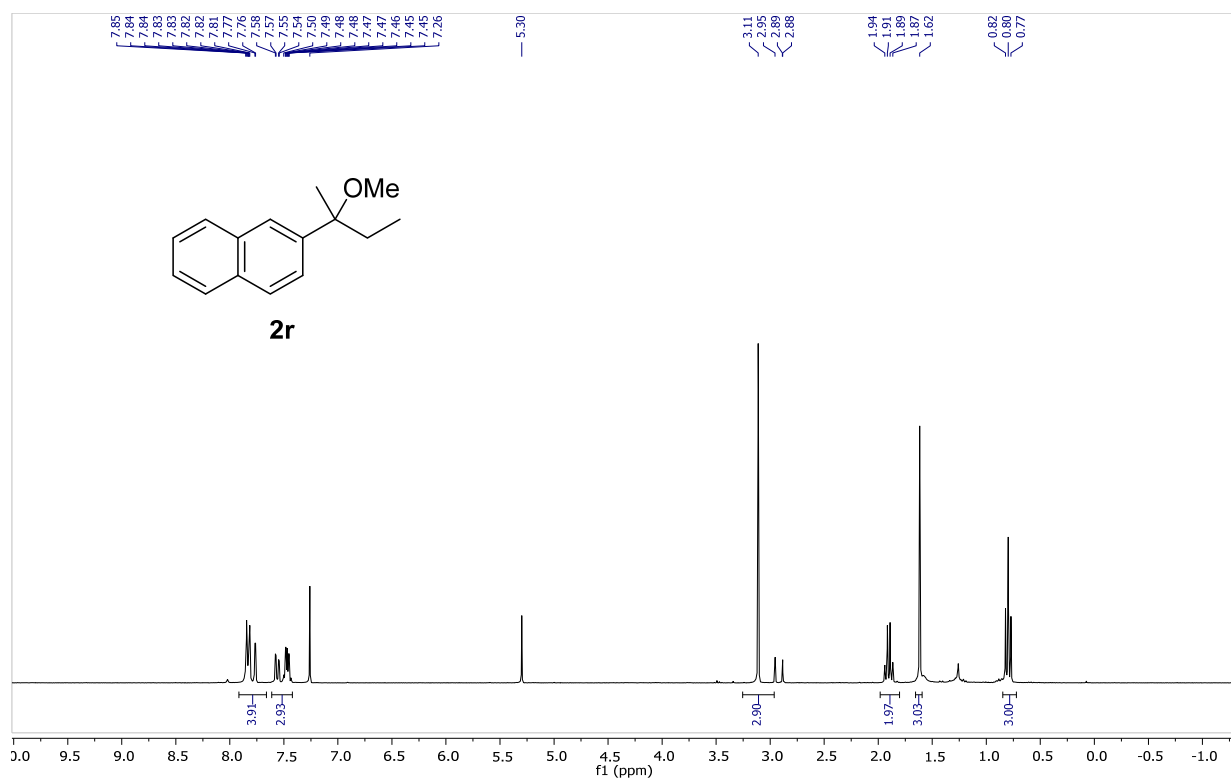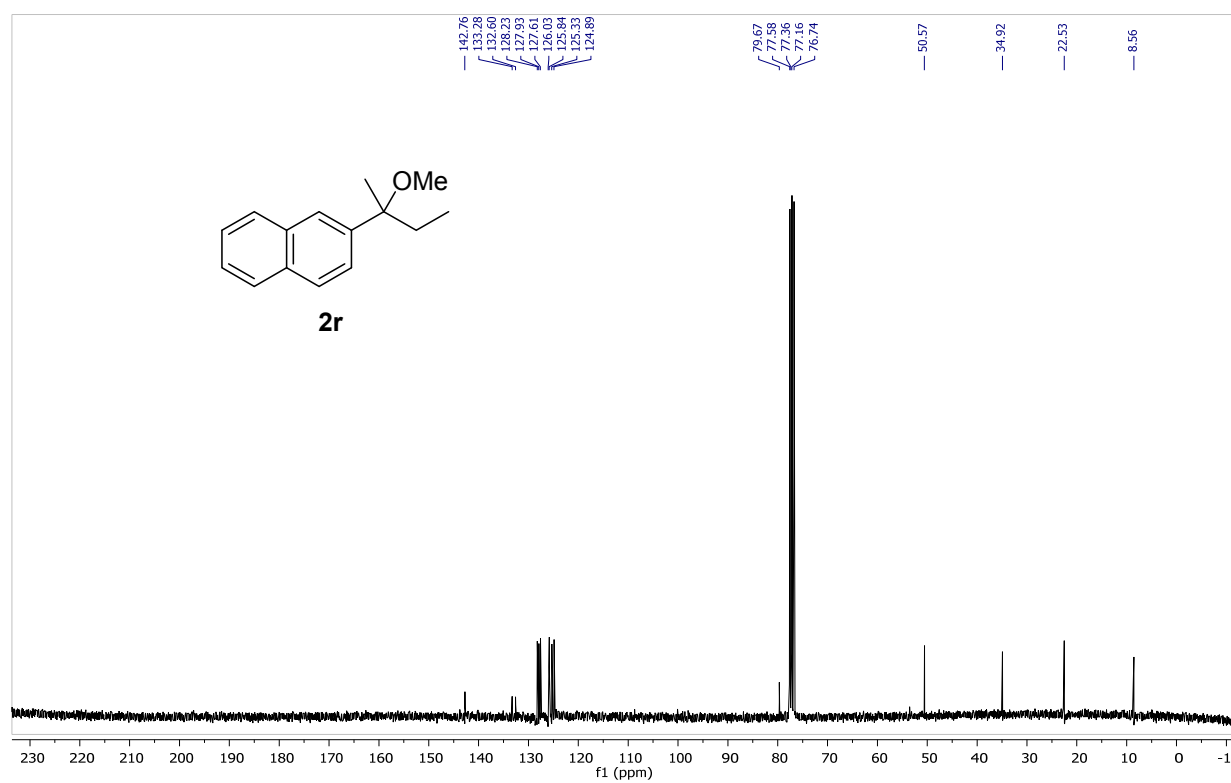

Supplementary Figure 35. <sup>1</sup>H and <sup>13</sup>C NMR spectra of **2r**

BAOX1232D.1.fid — ChemInfo\_1Hzg CDCl3 /opt/ xbao 20

7.326  
7.302  
7.283  
7.263  
7.118  
7.114  
7.100  
7.096  
7.082  
7.078  
7.074  
7.068  
7.065  
7.042  
7.038  
6.996  
6.991  
6.978  
6.973

2.957  
2.733  
2.721  
2.713  
2.690  
2.680  
2.679  
2.671  
2.658  
2.632  
2.619  
2.609  
2.603  
2.599  
2.577  
2.563  
1.989  
1.974  
1.967  
1.959  
1.954  
1.949  
1.946  
1.922  
1.910  
1.902  
1.805  
1.800  
1.792  
1.786  
1.786  
1.786  
1.768  
1.760  
1.753  
1.743  
1.739  
1.734  
1.715  
1.697  
1.697  
1.678  
1.678  
0.768  
0.750

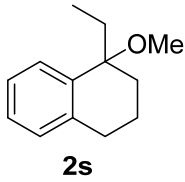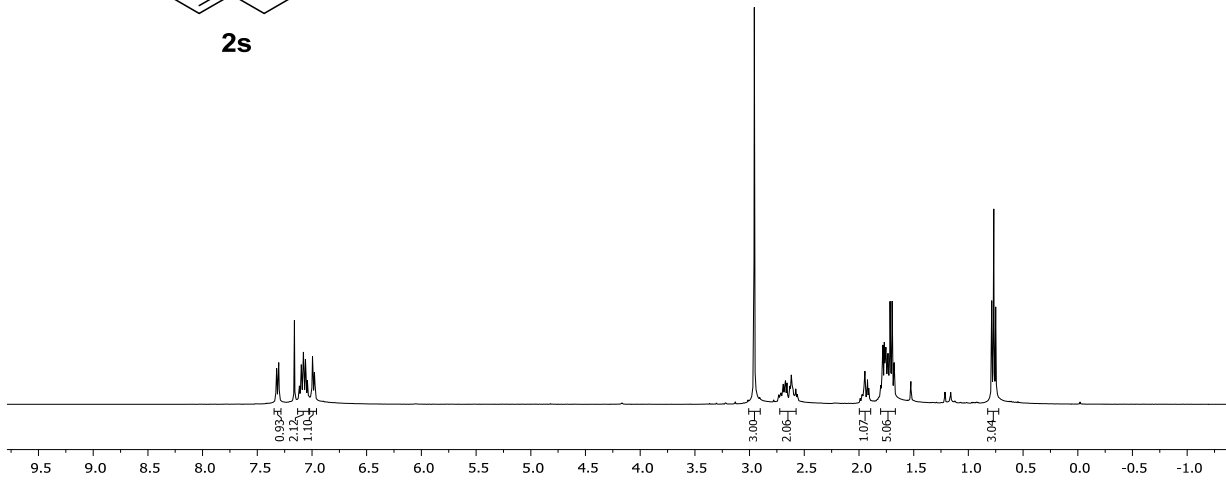

BAOX1232D.2.fid — ChemInfo\_13C\_cpdc CDCl3 /opt/ xbao 20

139.666  
138.673  
128.787  
127.019  
126.859  
125.906

77.933  
77.478  
76.843

50.384

35.170

29.971

29.514

20.770

8.415

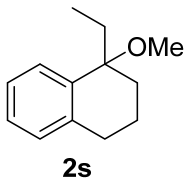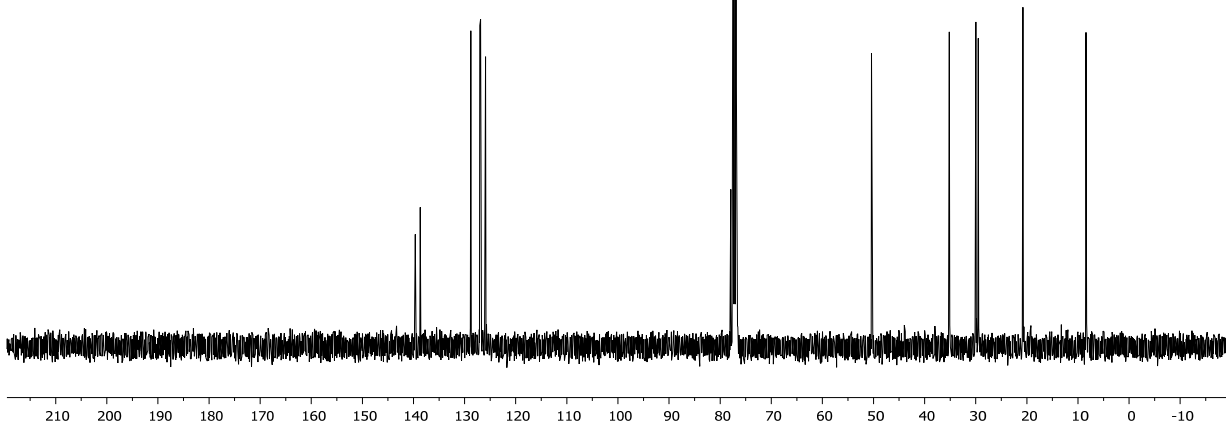

Supplementary Figure 36.  $^1\text{H}$  and  $^{13}\text{C}$  NMR spectra of **2s**

01ty100 20160219.1

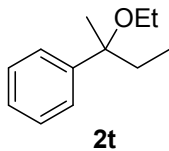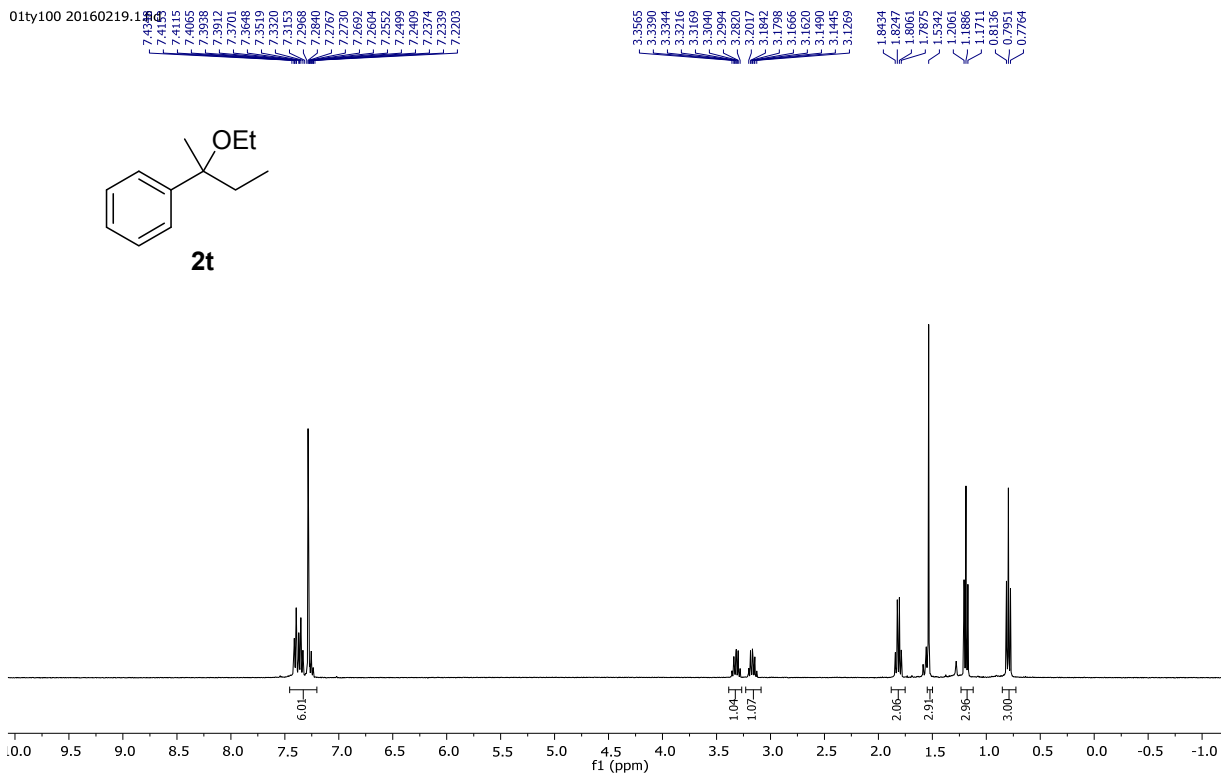

01ty100 13C.1.fid

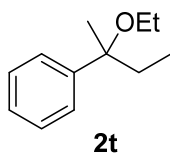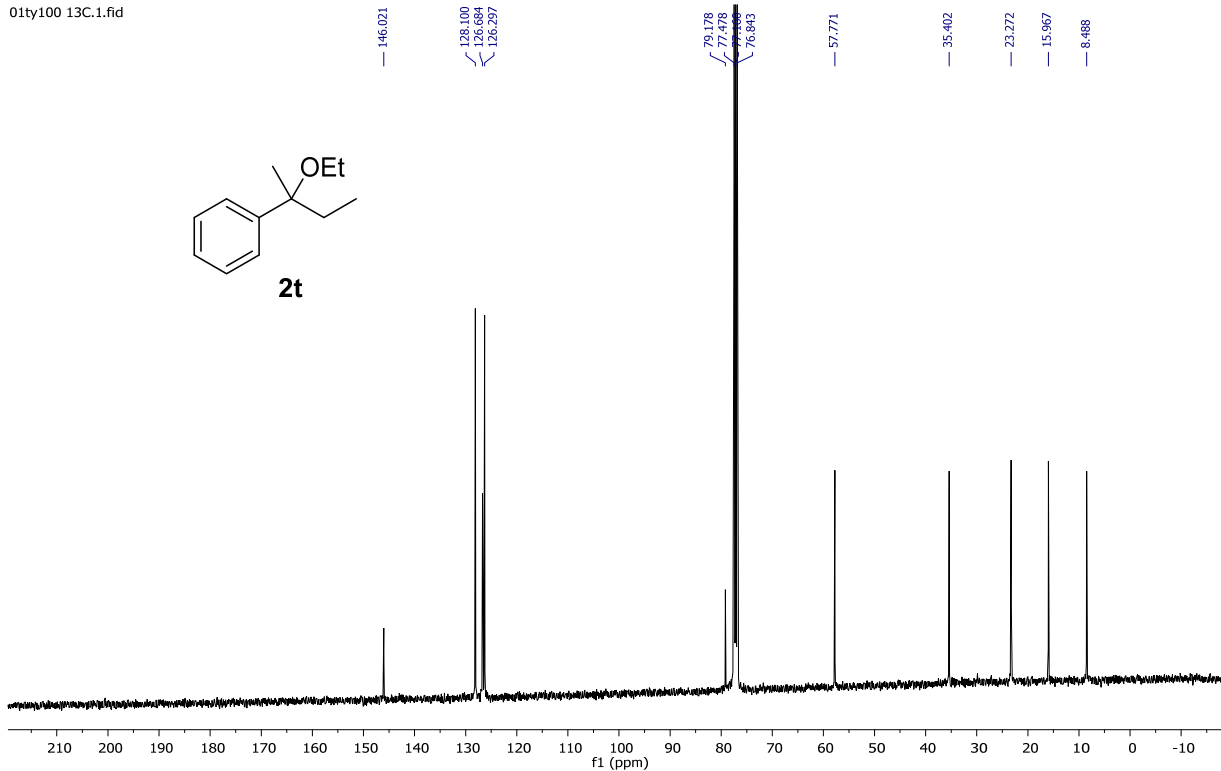

Supplementary Figure 37.  $^1\text{H}$  and  $^{13}\text{C}$  NMR spectra of **2t**

01ty101 2 product.1.fid  
01ty101 2 product

7.50  
7.47  
7.45  
7.42  
7.38  
7.36  
7.34  
7.31  
7.28  
7.28  
7.26  
7.24  
7.22

3.69  
3.67  
3.56  
3.54  
3.52  
3.51  
3.49

1.85  
1.83  
1.81  
1.79  
1.57  
1.15  
1.13  
1.01  
0.74  
0.72  
0.71

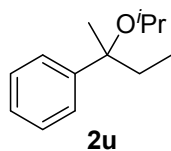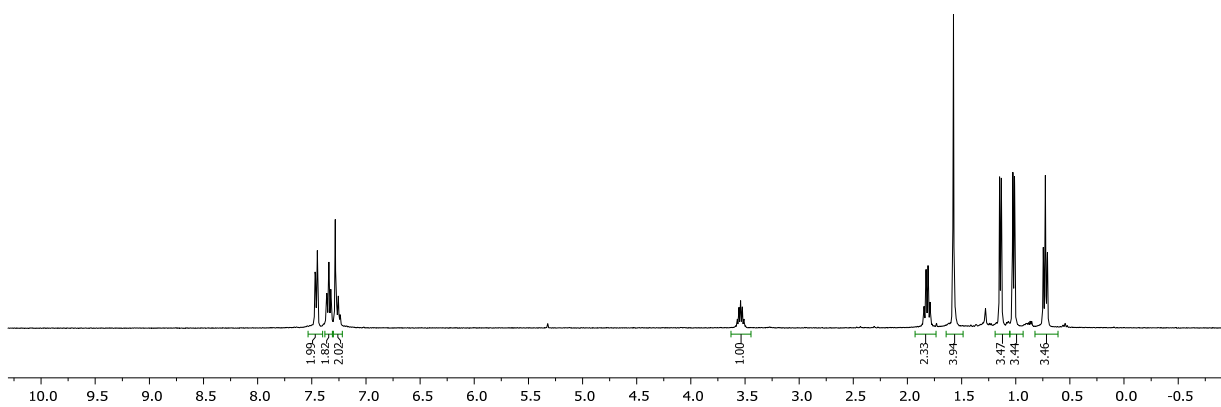

01ty101 13C.1.fid  
ChemInfo\_13C\_qd CDCl3/opt/ yokoe 52

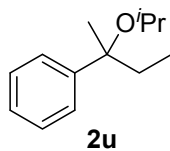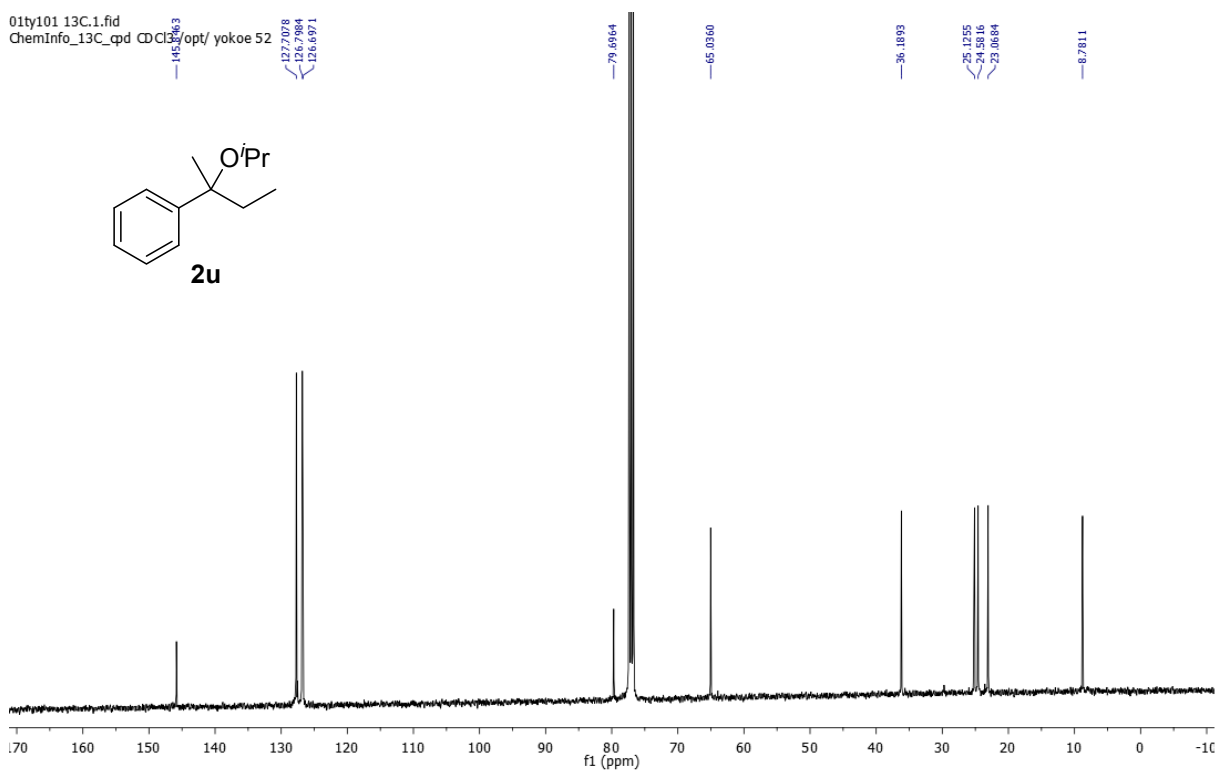

Supplementary Figure 38.  $^1\text{H}$  and  $^{13}\text{C}$  NMR spectra of **2t**

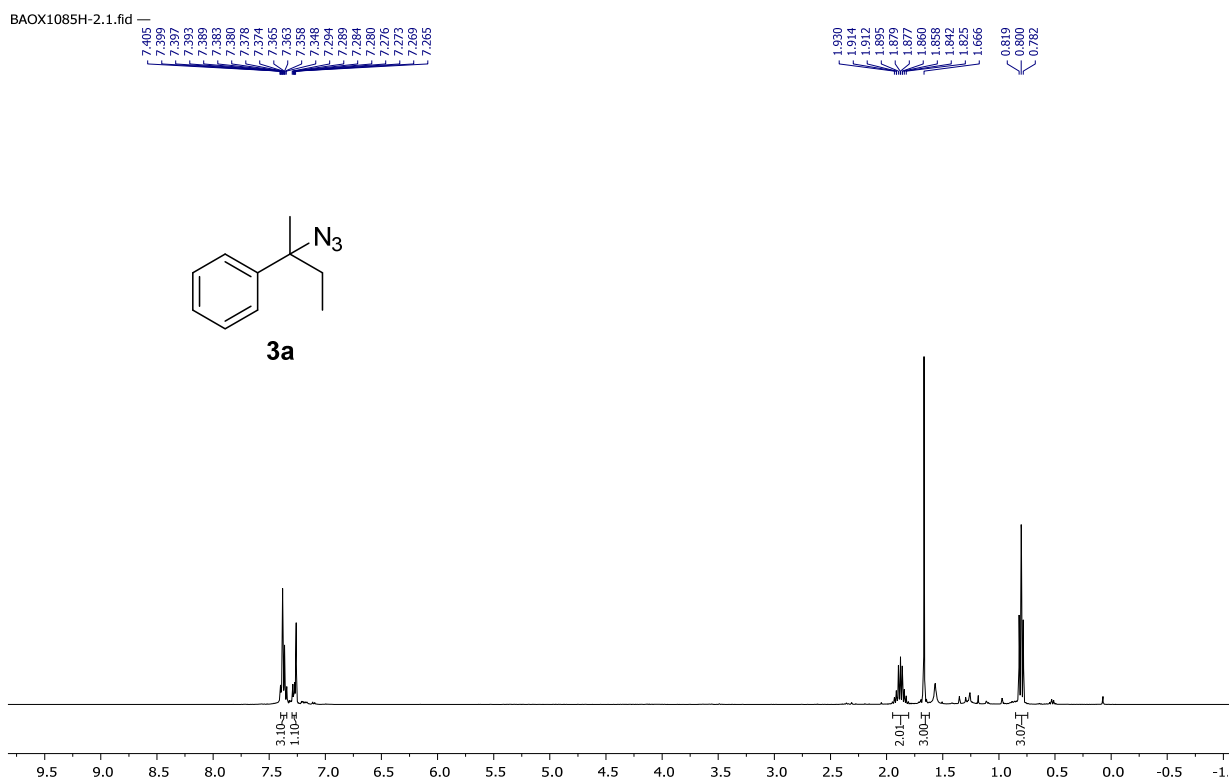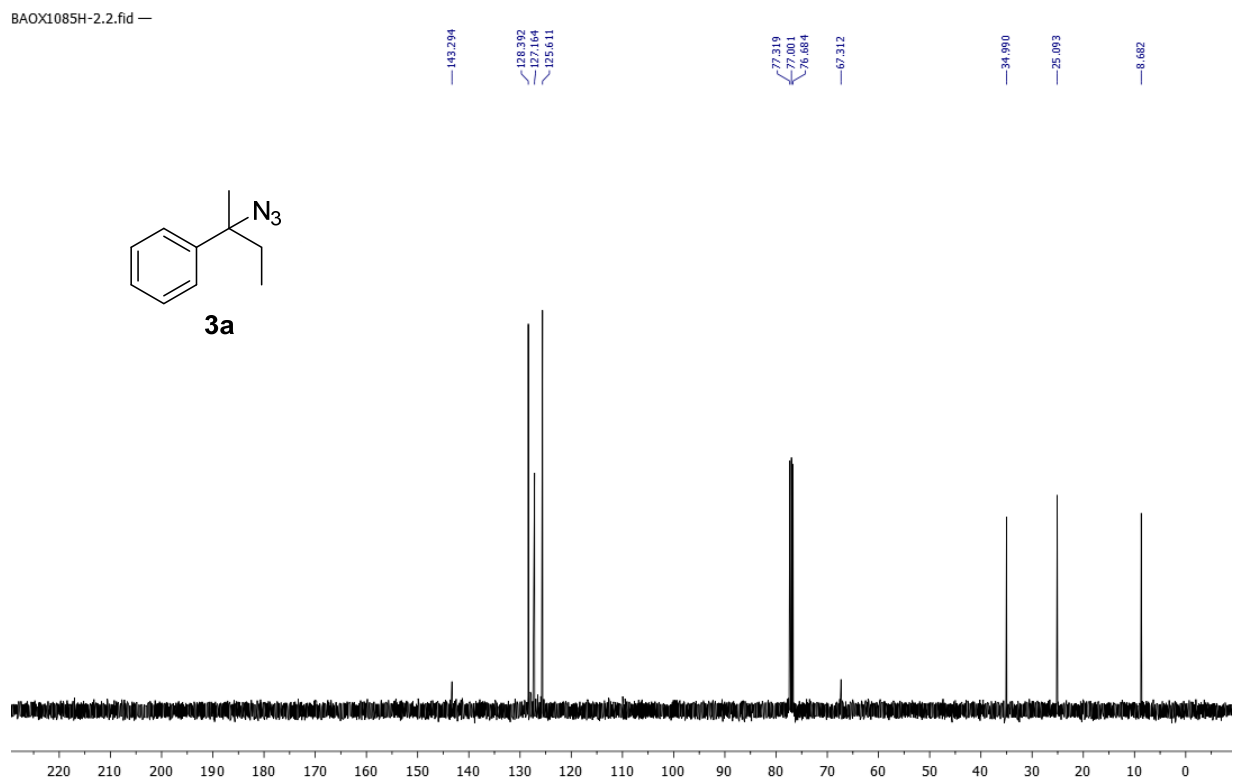

Supplementary Figure 39.  $^1\text{H}$  and  $^{13}\text{C}$  NMR spectra of **3a**



BAOX1091A.1.fid — ChemInfo\_1Hzg CDCl3 /opt/ xbao 48

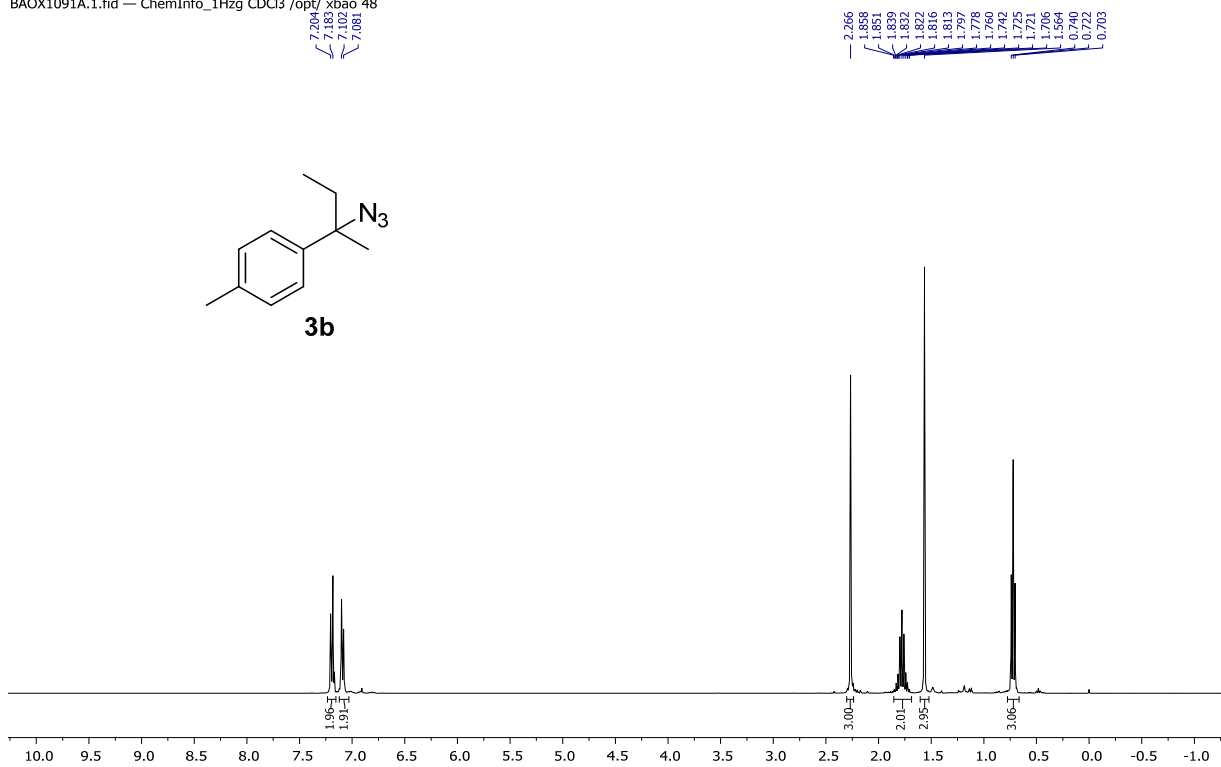

BAOX1091A.2.fid — ChemInfo\_13C\_cpd CDCl3 /opt/ xbao 48

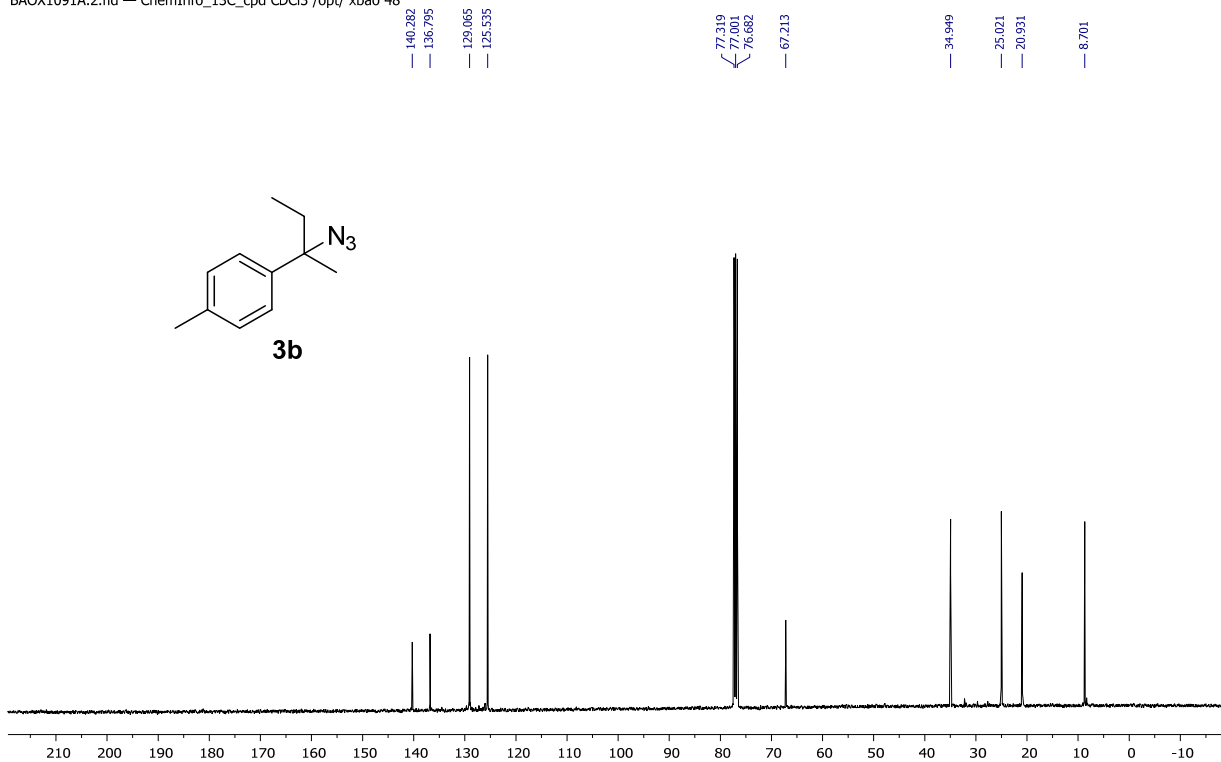

Supplementary Figure 40. <sup>1</sup>H and <sup>13</sup>C NMR spectra of **3b**

BAOX1092B.1.fid — ChemInfo\_1Hzg CDCl3 /opt/ xbao 50

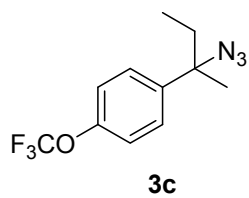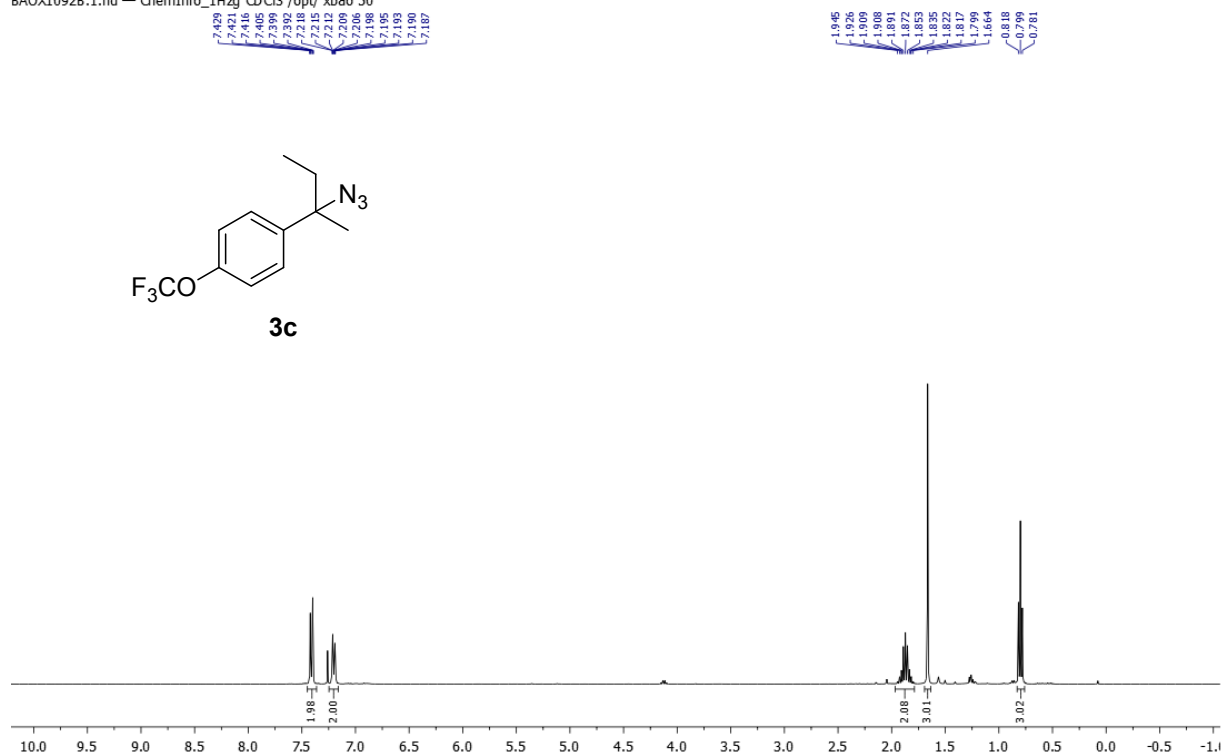

BAOX1092B.2.fid — ChemInfo\_13C\_cpq CDCl3 /opt/ xbao 50

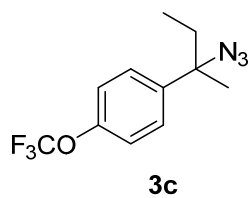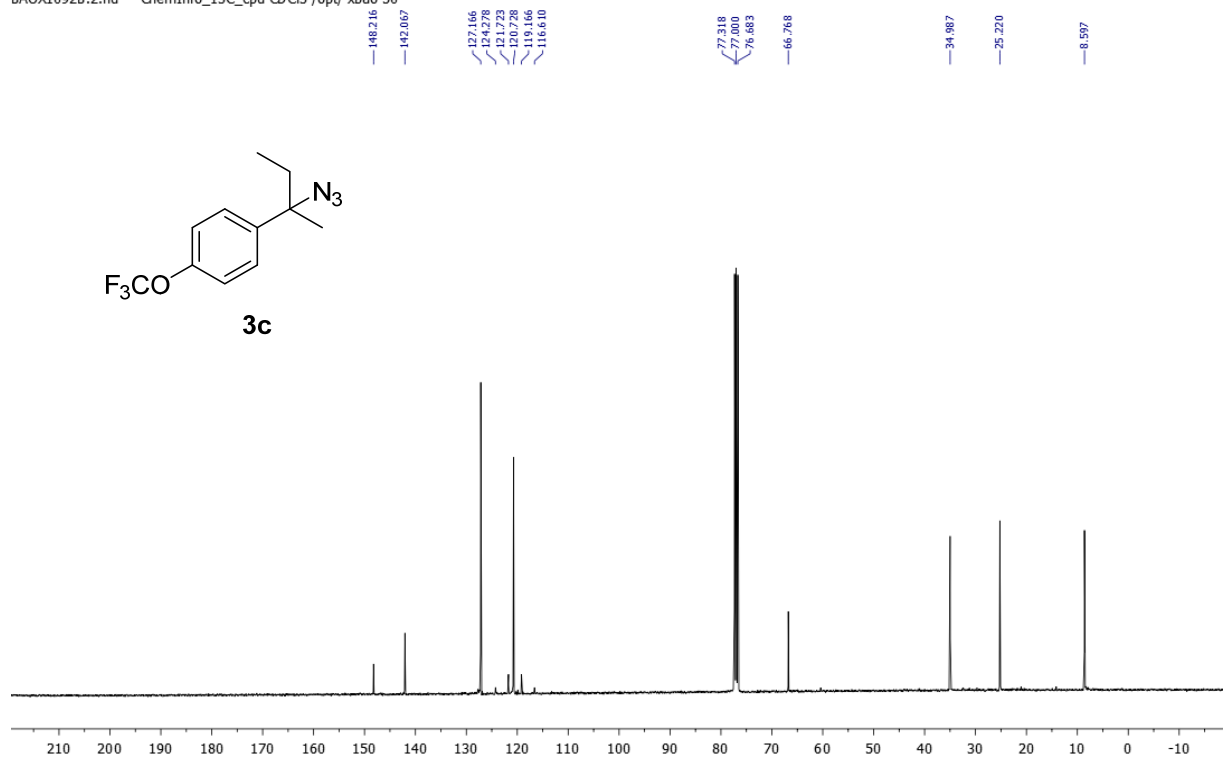

Supplementary Figure 41.  $^1\text{H}$  and  $^{13}\text{C}$  NMR spectra of **3c**

BAOX1092C.1.fid — ChemInfo\_1Hzg CDCl3 /opt/ xbao 51

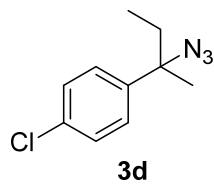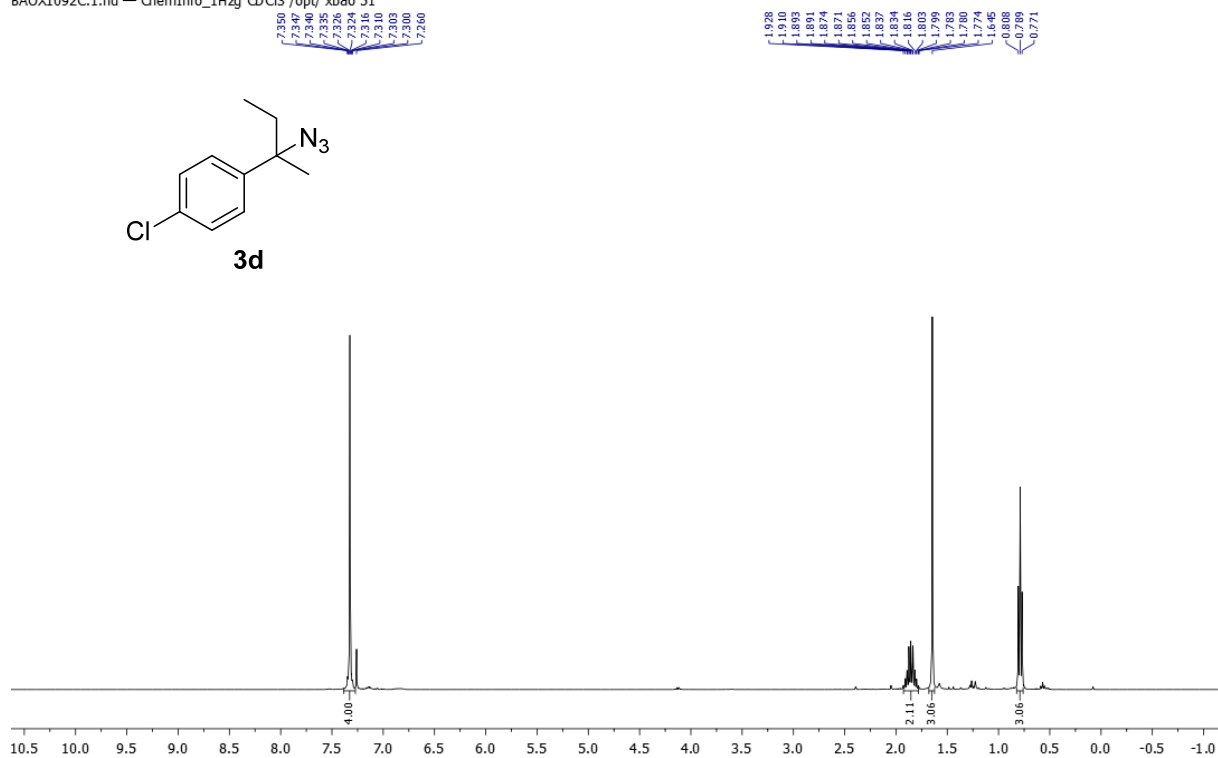

BAOX1092C.2.fid — ChemInfo\_13C\_cpd CDCl3 /opt/ xbao 51

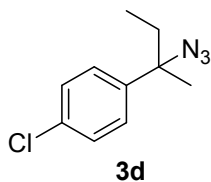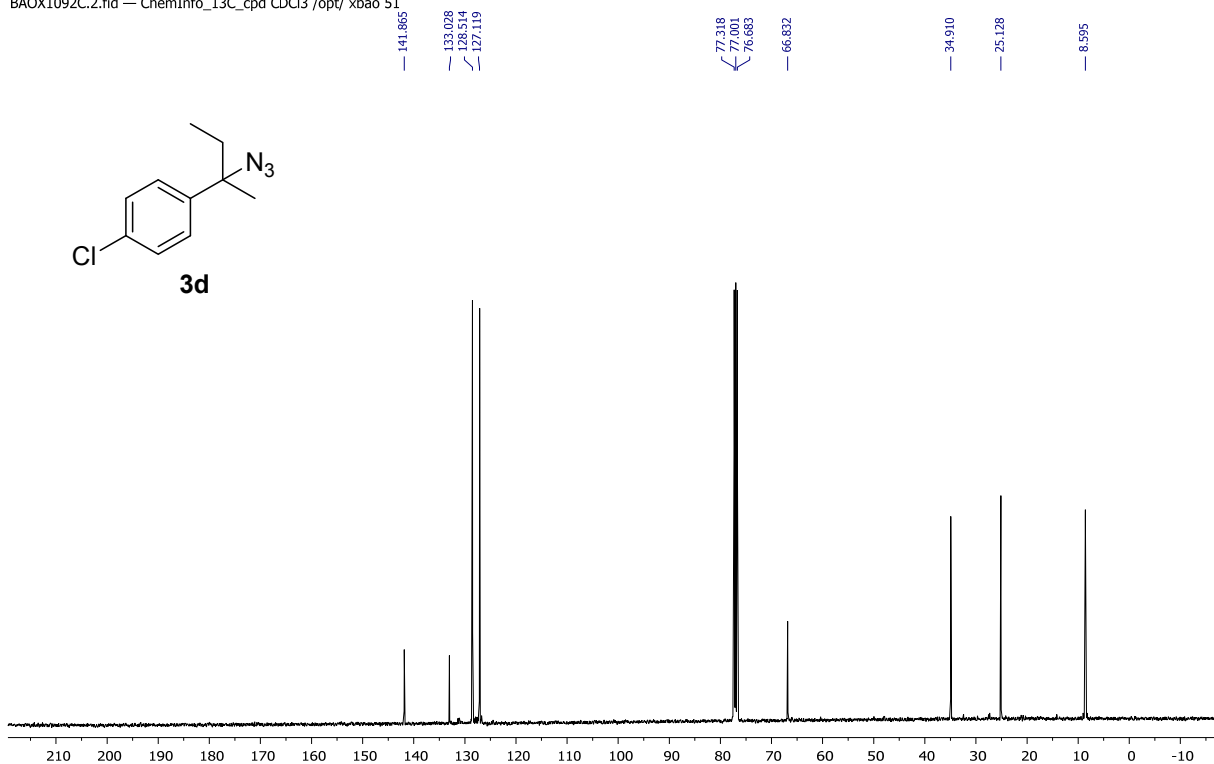

Supplementary Figure 42.  $^1\text{H}$  and  $^{13}\text{C}$  NMR spectra of **3d**

BAOX1094H.1.fid —

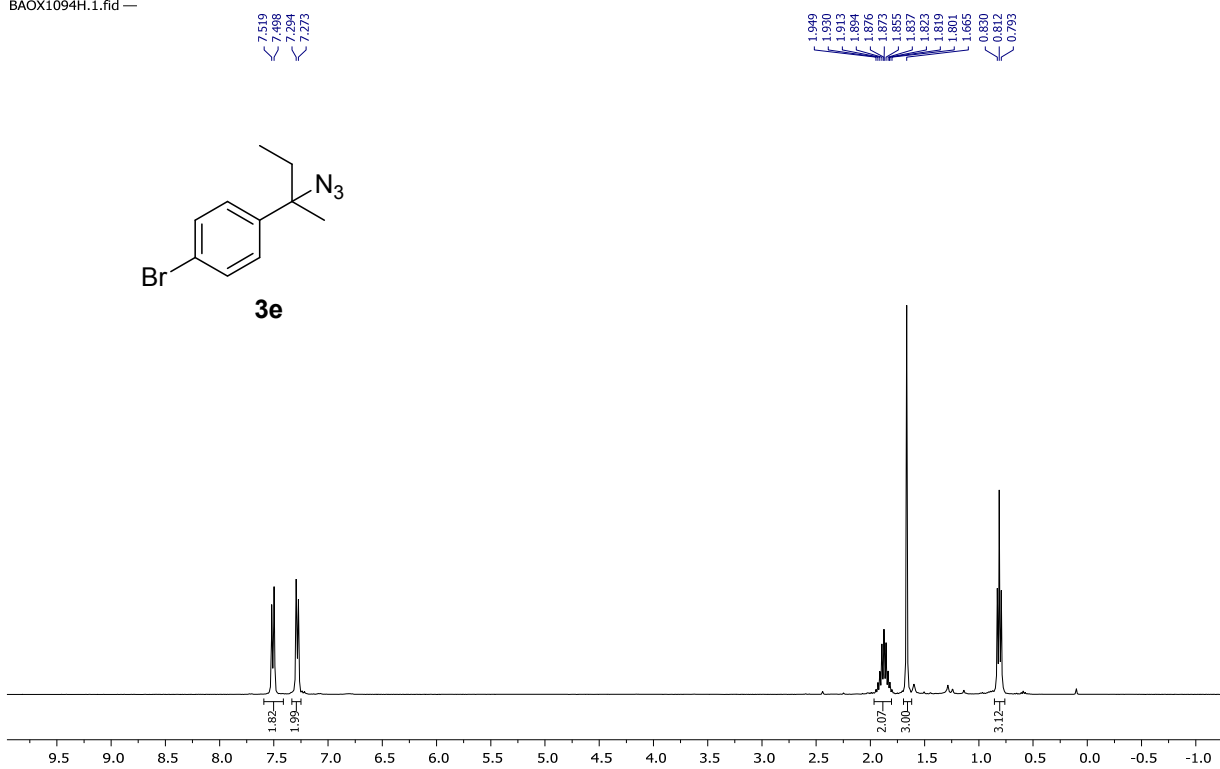

BAOX1094H.2.fid —

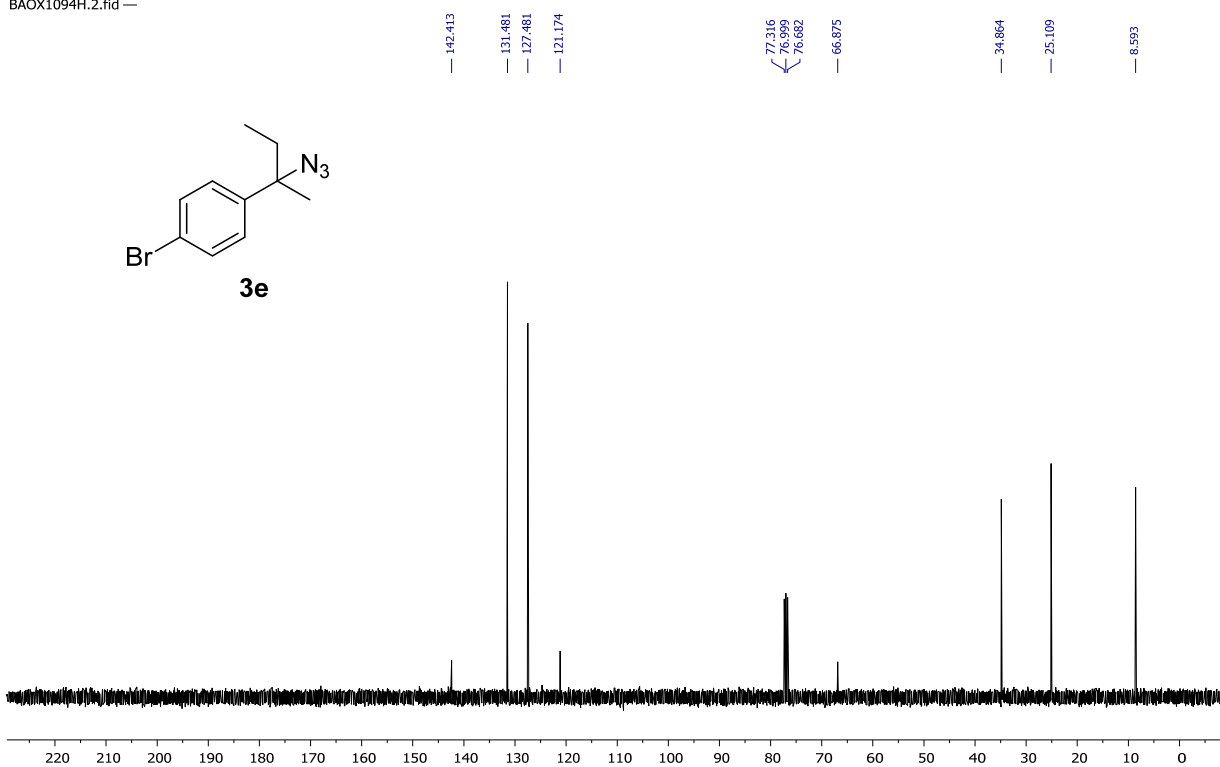

Supplementary Figure 43. <sup>1</sup>H and <sup>13</sup>C NMR spectra of **3e**

BAOX1100A-2.1.fid —

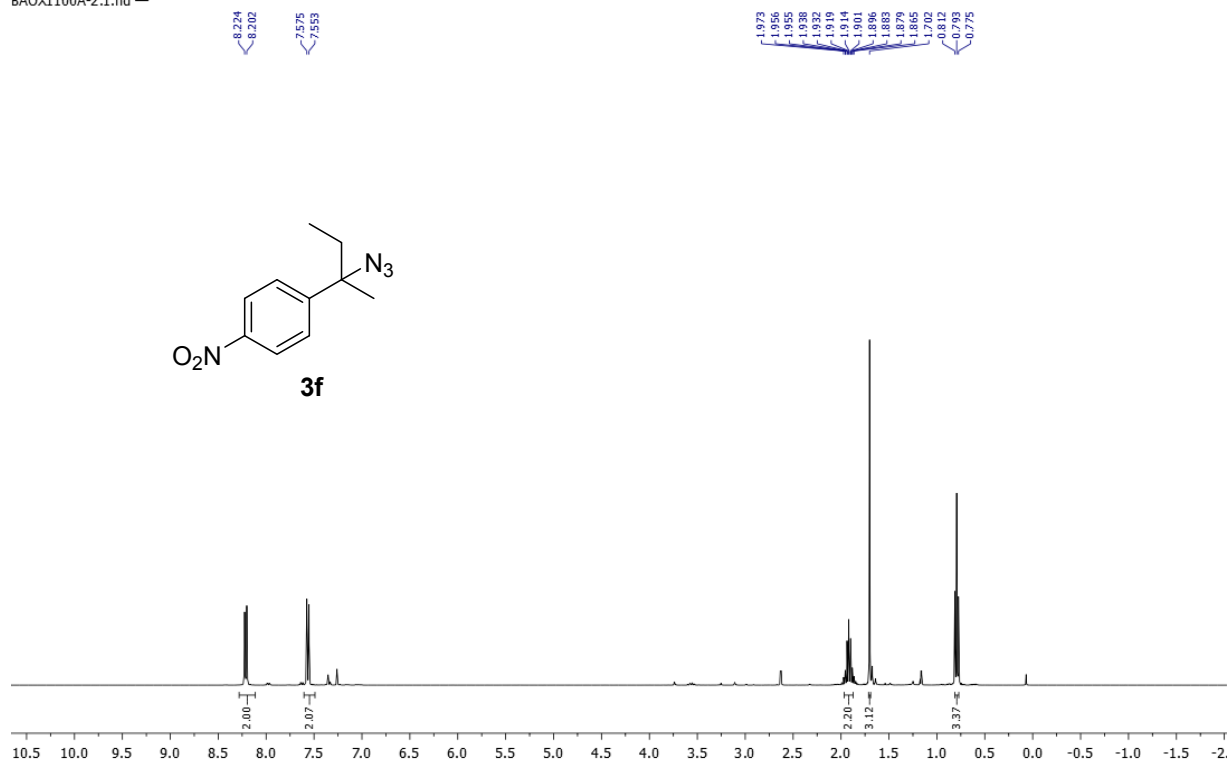

BAOX1100A-2.3.fid —

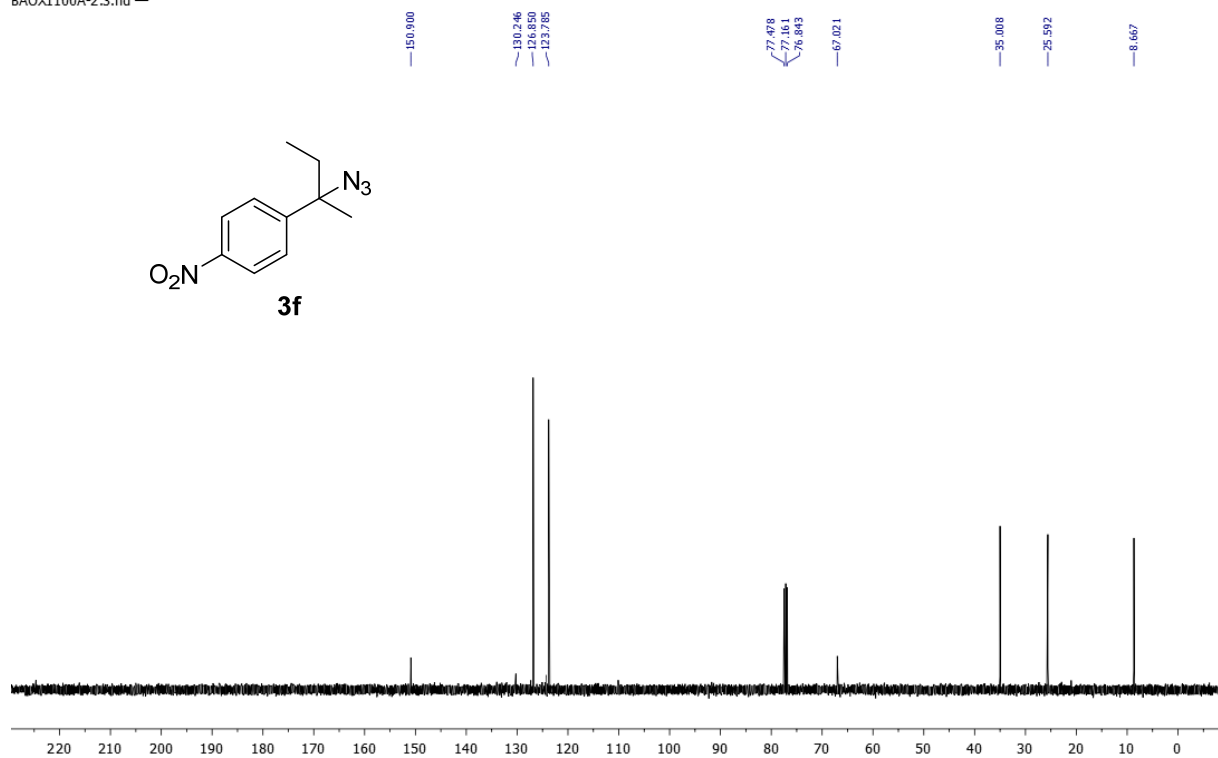

Supplementary Figure 44. <sup>1</sup>H and <sup>13</sup>C NMR spectra of **3f**

BAOX1100D-2.1.fid —

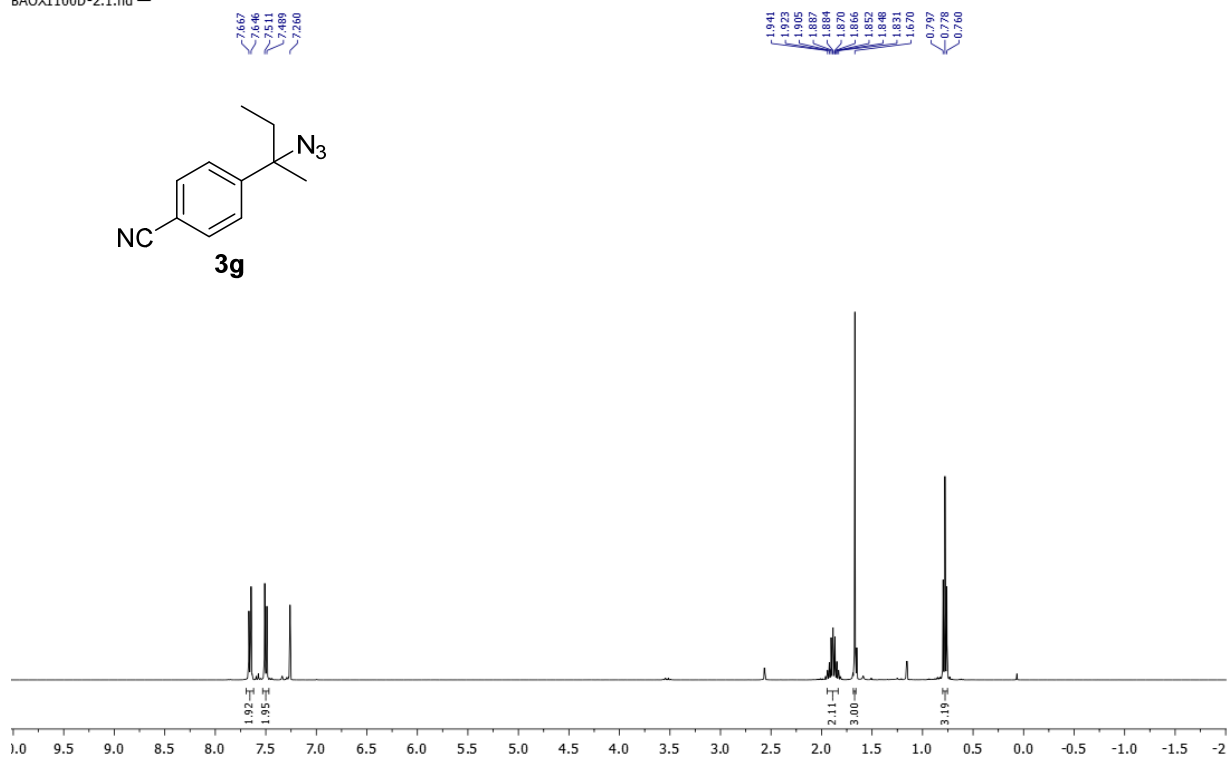

BAOX1100D-2.2.fid —

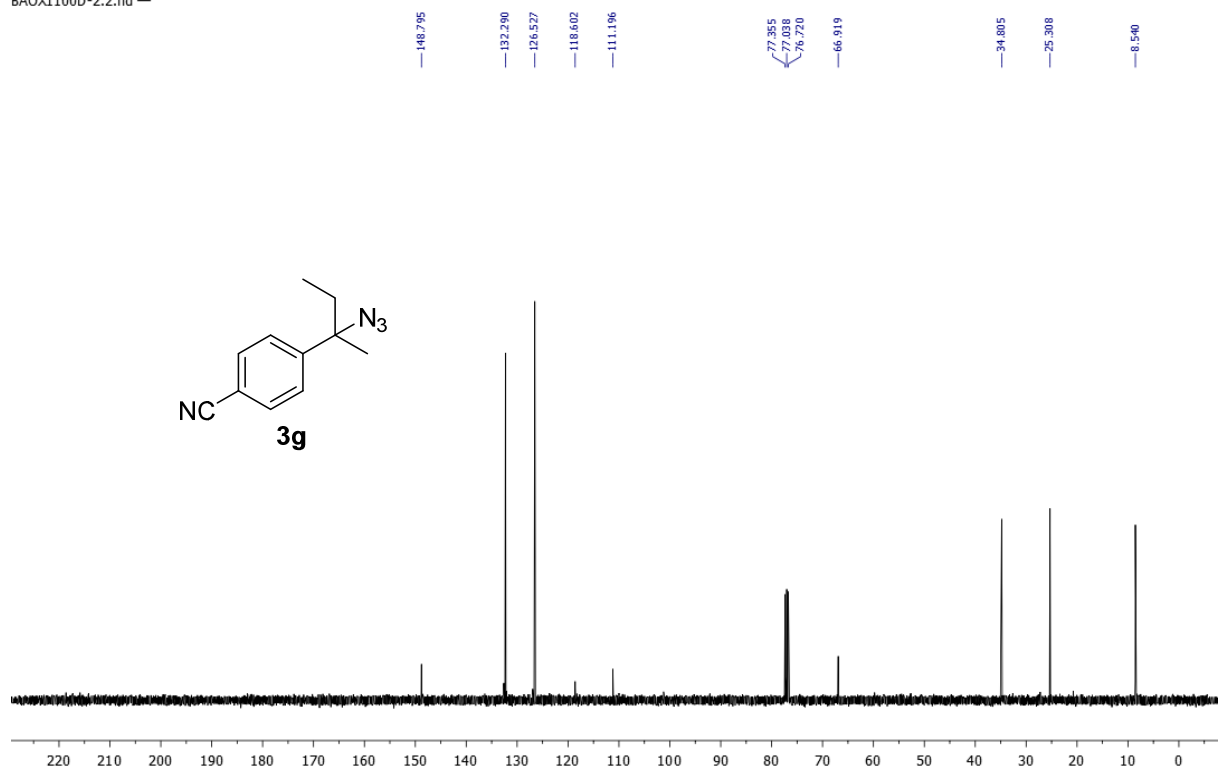

Supplementary Figure 45. <sup>1</sup>H and <sup>13</sup>C NMR spectra of **3g**

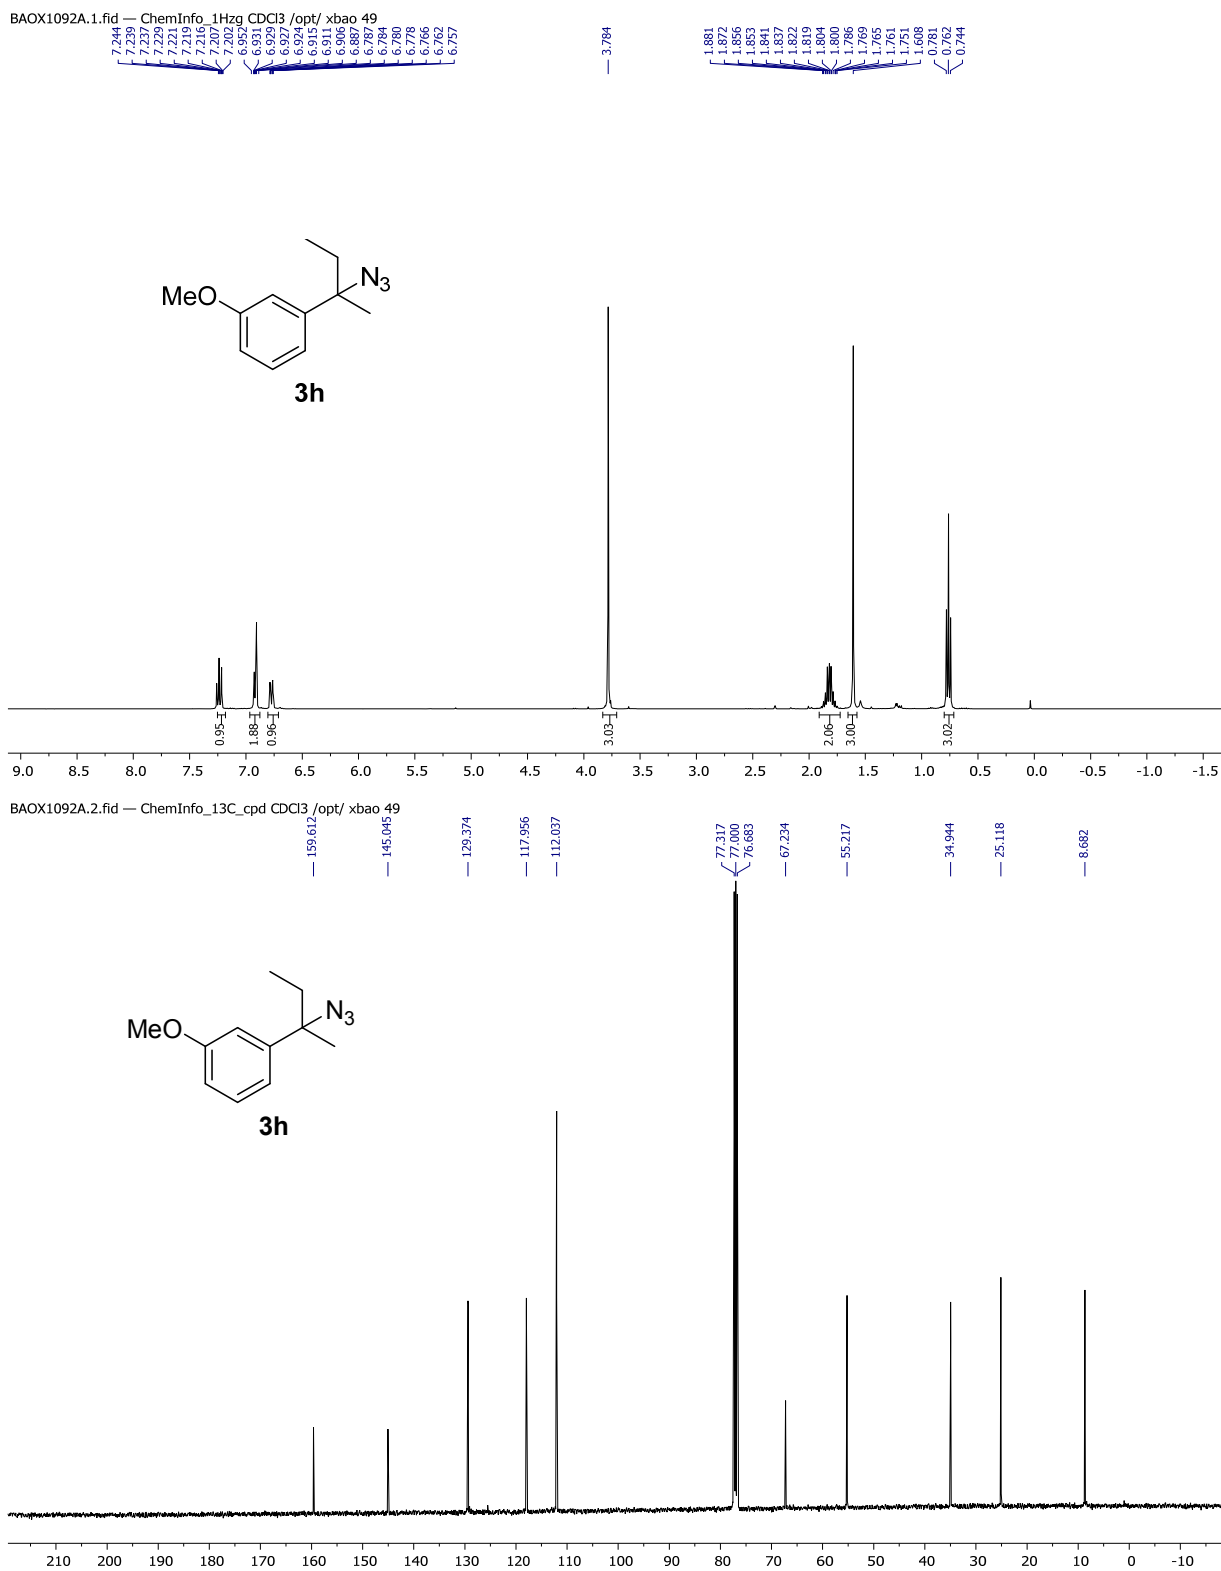

Supplementary Figure 46. <sup>1</sup>H and <sup>13</sup>C NMR spectra of **3h**

BAOX1091C.1.fid —

7.317  
7.302  
7.284  
7.269  
7.239  
7.217  
7.197  
7.151  
7.128  
7.109  
7.089

2.408  
1.952  
1.934  
1.921  
1.907  
1.898  
1.884  
1.879  
1.866  
1.848  
1.842  
1.830  
1.771  
1.705  
1.684  
0.855  
0.837  
0.818

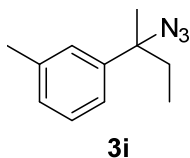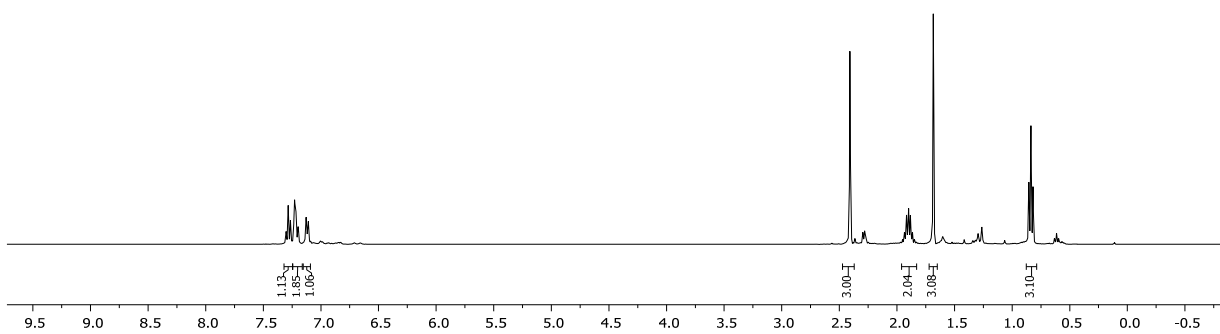

BAOX1091C.2.fid —

143.259  
137.957  
128.248  
127.891  
126.310  
122.653

77.317  
77.000  
76.683

67.289

34.948

25.100

21.636

8.709

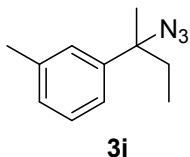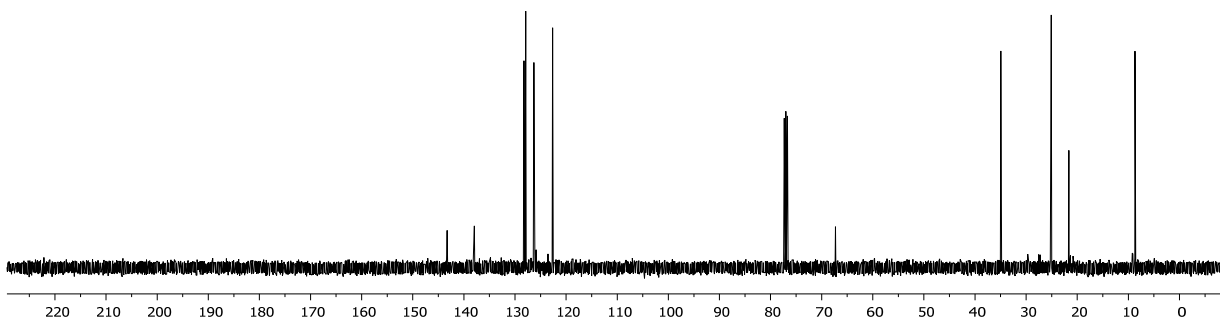

Supplementary Figure 47. <sup>1</sup>H and <sup>13</sup>C NMR spectra of **3i**



BAOX1094F.1.fid —

7.410  
7.405  
7.400  
7.343  
7.325  
7.306  
7.293  
7.291  
7.285  
7.279  
7.273  
7.268  
7.263

1.941  
1.924  
1.906  
1.888  
1.889  
1.851  
1.834  
1.676  
0.942  
0.853  
0.805

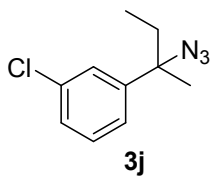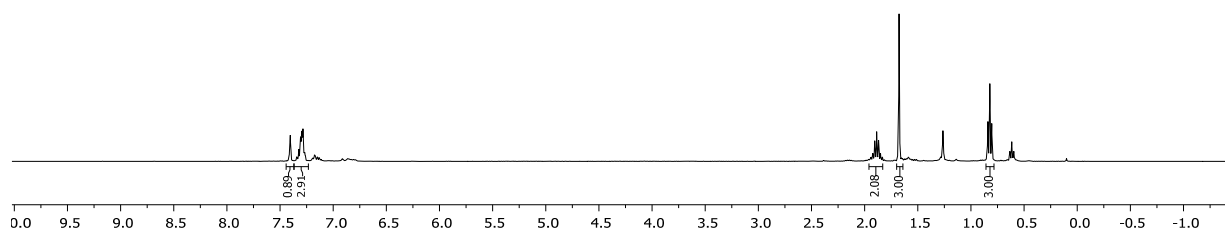

BAOX1094F.2.fid —

145.534  
134.413  
129.673  
127.352  
126.028  
123.834

77.317  
77.000  
76.682

66.830

34.893

25.165

8.607

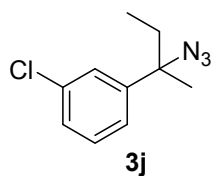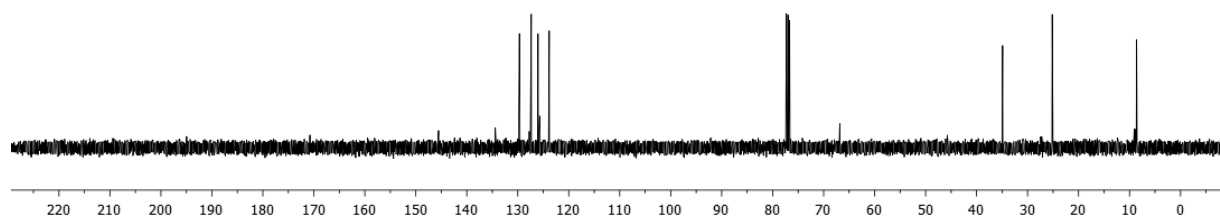

Supplementary Figure 48. <sup>1</sup>H and <sup>13</sup>C NMR spectra of **3j**

BAOX1094E.1.fid —

7.341  
7.335  
7.336  
7.330  
7.210  
7.206  
7.197  
7.192  
7.179  
7.174  
7.166  
7.150

2.576  
2.009  
1.993  
1.983  
1.974  
1.964  
1.956  
1.946  
1.937  
1.928  
1.911  
1.891  
1.733  
0.828  
0.809

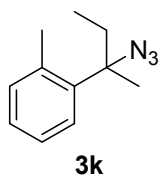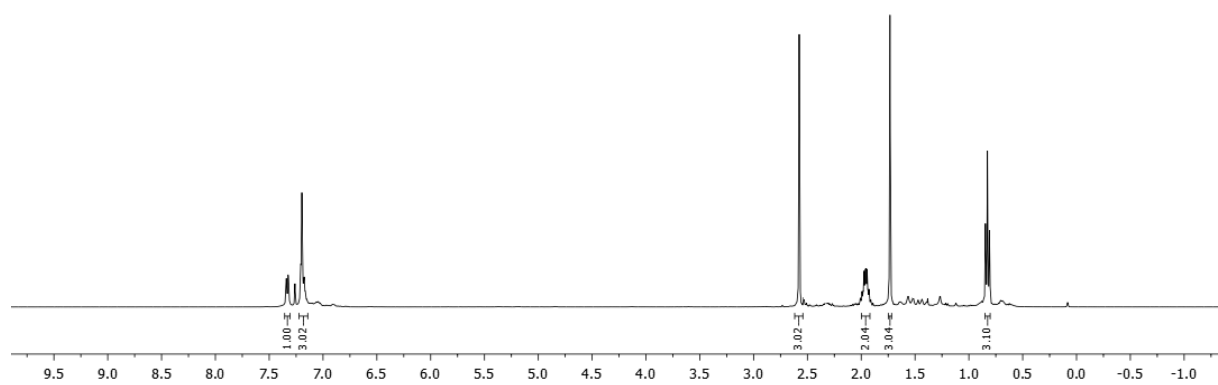

BAOX1094E.2.fid —

140.081  
136.191  
132.850  
127.070  
125.650

77.318  
77.001  
76.684  
68.115

32.650  
24.488  
21.747

8.952

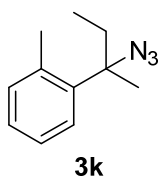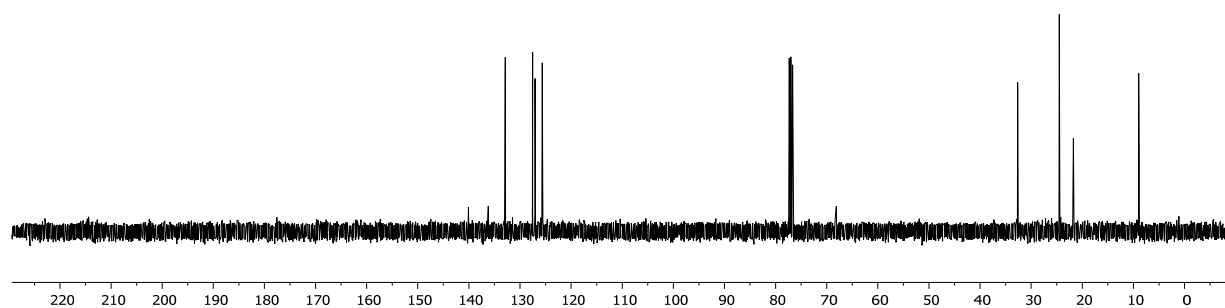

Supplementary Figure 49. <sup>1</sup>H and <sup>13</sup>C NMR spectra of 3k

BAOX1094B.1.fid — ChemInfo\_1Hzq CDCl3 /opt/ xbao 8

7.246  
7.194  
7.151  
7.148  
7.138  
7.119  
7.110  
7.095  
7.090

2.288  
2.258  
1.913  
1.896  
1.881  
1.878  
1.877  
1.859  
1.843  
1.841  
1.826  
1.808  
1.790  
1.641  
1.631  
1.612  
1.594  
1.574

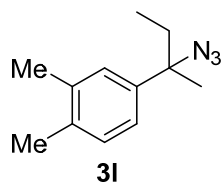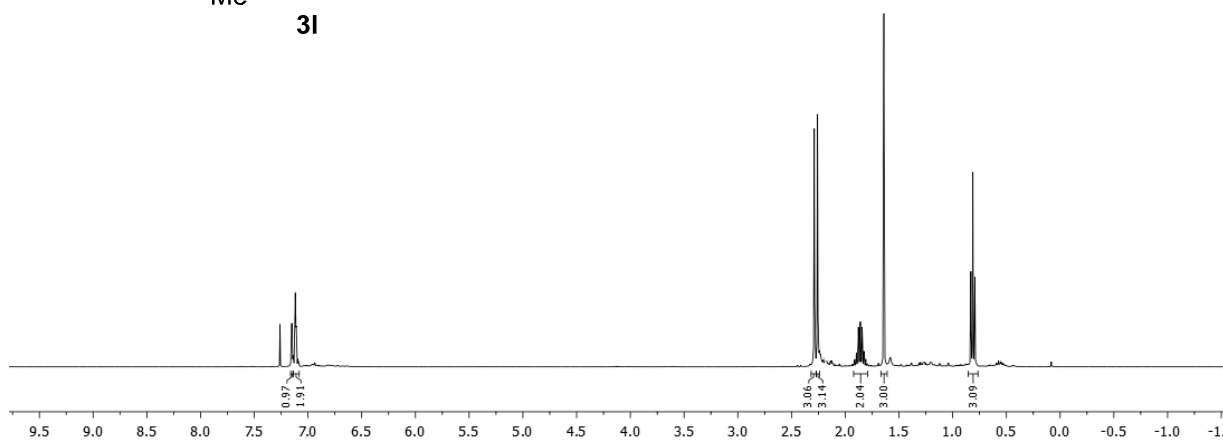

BAOX1094B.2.fid — ChemInfo\_13C\_cpd CDCl3 /opt/ xbao 8

140.745  
136.504  
135.456  
129.588  
126.863  
123.001

77.319  
76.694  
67.190  
34.913  
25.050  
20.094  
19.310  
8.754

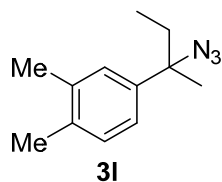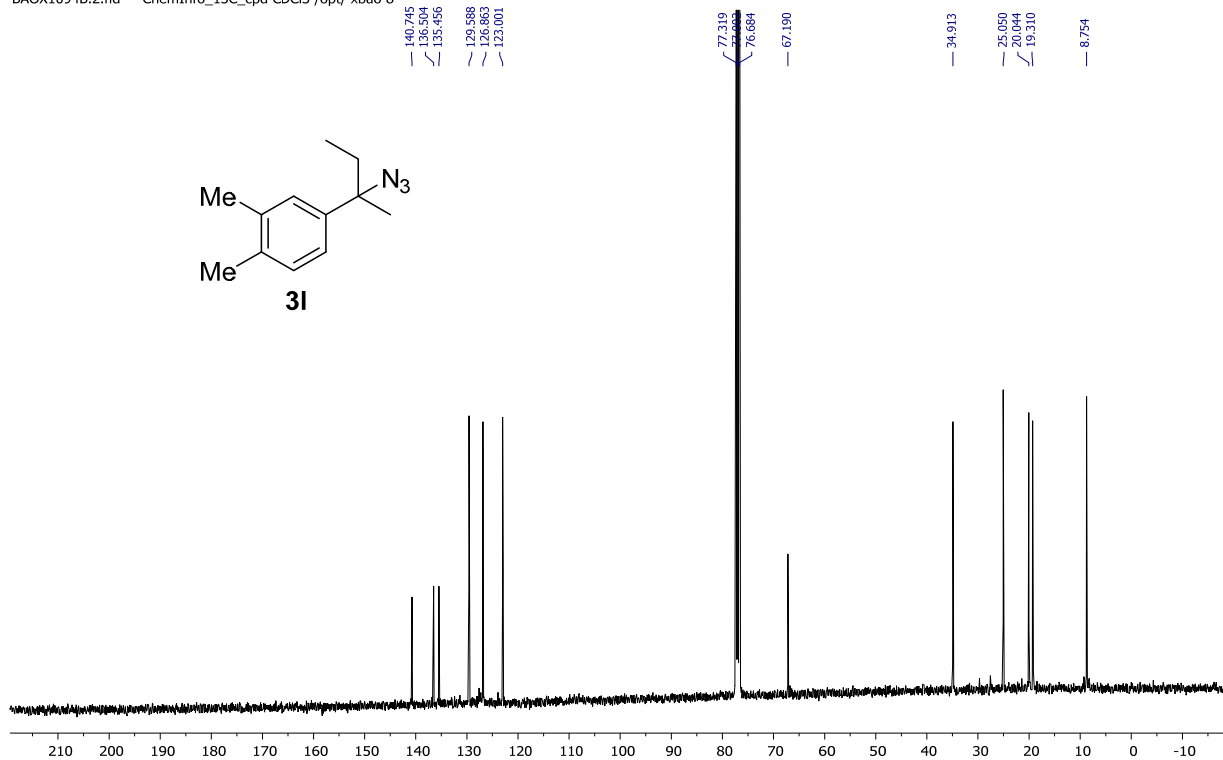

Supplementary Figure 50. <sup>1</sup>H and <sup>13</sup>C NMR spectra of 31

BAOX1094I.1.fid — ChemInfo\_1Hzq CDCl3 /opt/ xbao 51

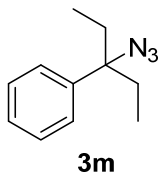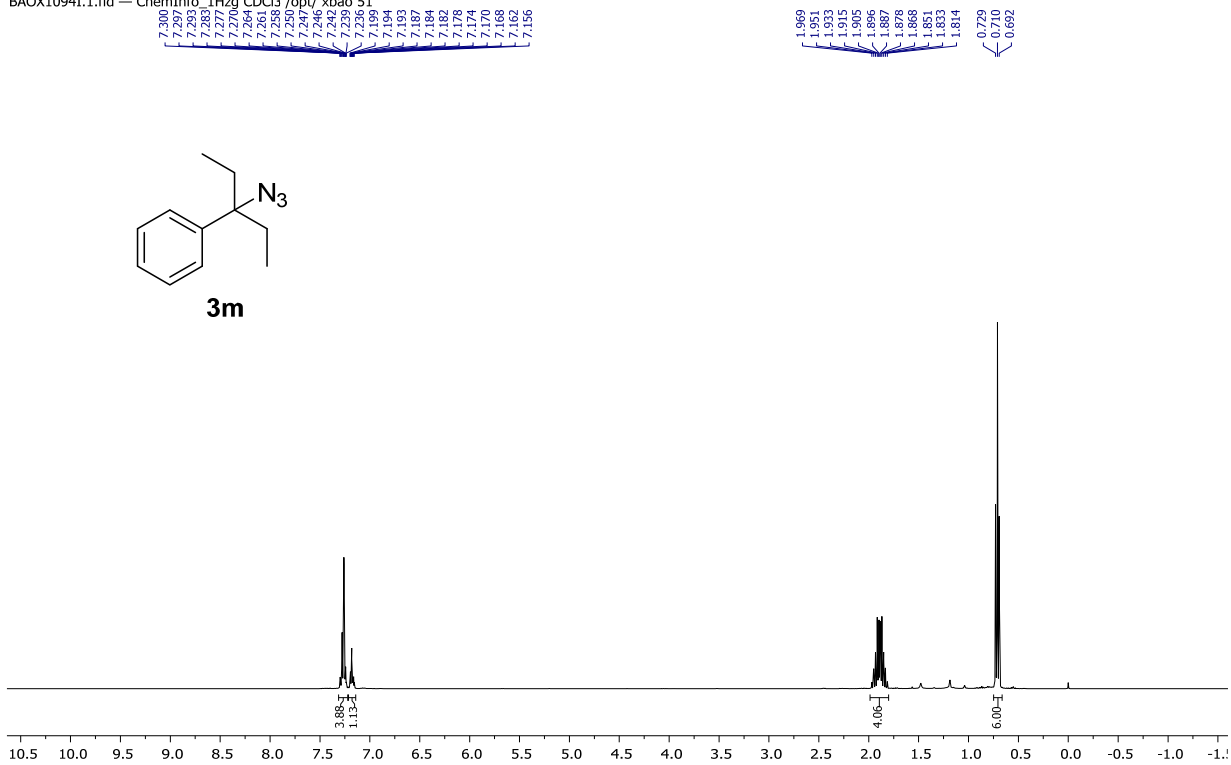

BAOX1094I.2.fid — ChemInfo\_13C\_cpq CDCl3 /opt/ xbao 51

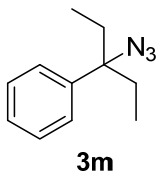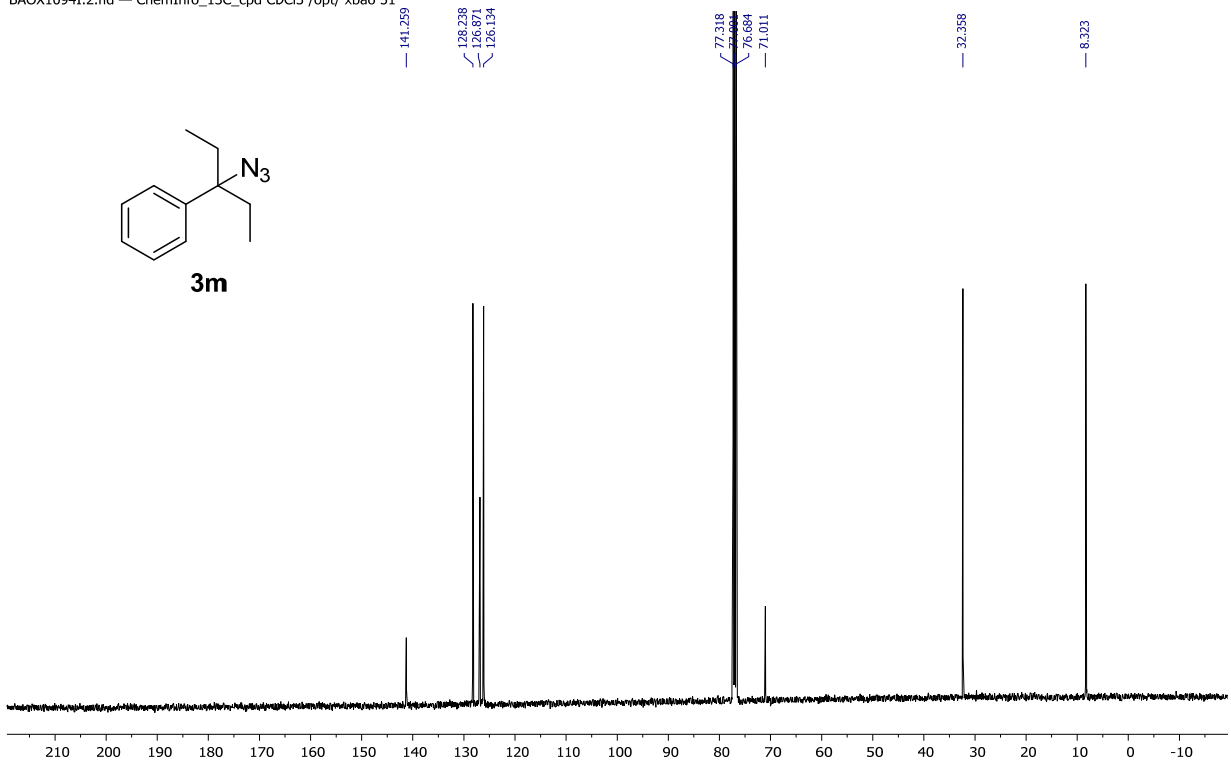

Supplementary Figure 51.  $^1\text{H}$  and  $^{13}\text{C}$  NMR spectra of **3m**

BAOX1091D.1.fid — ChemInfo\_1Hzq CDC13 /opt/ xbao 45

7.289  
7.287  
7.282  
7.277  
7.276  
7.256  
7.246  
7.233  
7.228  
7.223  
7.196  
7.191  
7.188  
7.176  
7.167  
7.164  
7.158  
7.153

2.148  
2.130  
2.112  
2.102  
2.094  
2.085  
2.076  
2.068  
2.064  
2.052  
2.035  
2.017  
1.999  
1.980  
0.889  
0.872  
0.860  
0.842  
0.742  
0.724  
0.712  
0.695

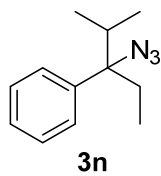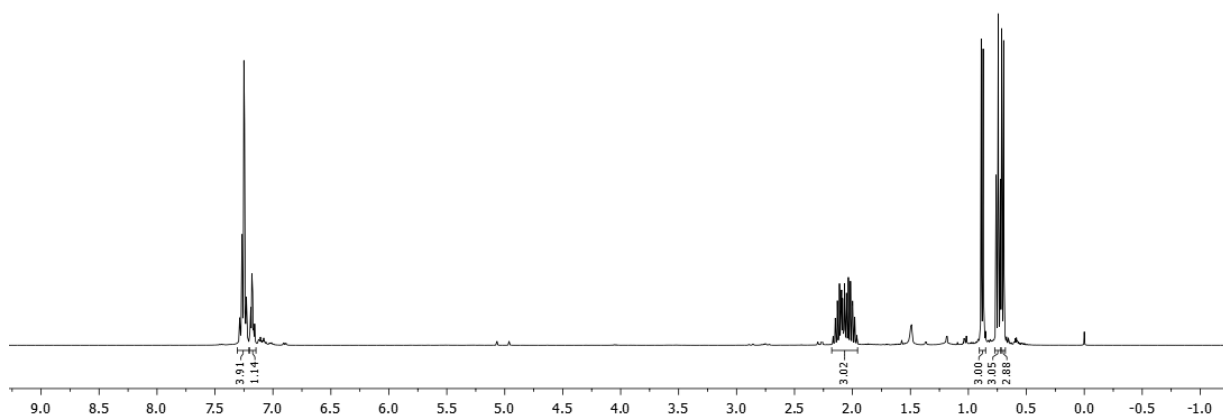

BAOX1091D.2.fid — refe\_13C\_cpq CDC13 /opt/ xbao 45

140.153

127.912  
126.885  
126.745

77.318  
77.001  
76.684  
73.681

38.081

29.199

17.906  
17.474

8.646

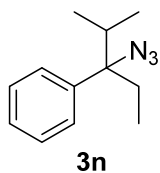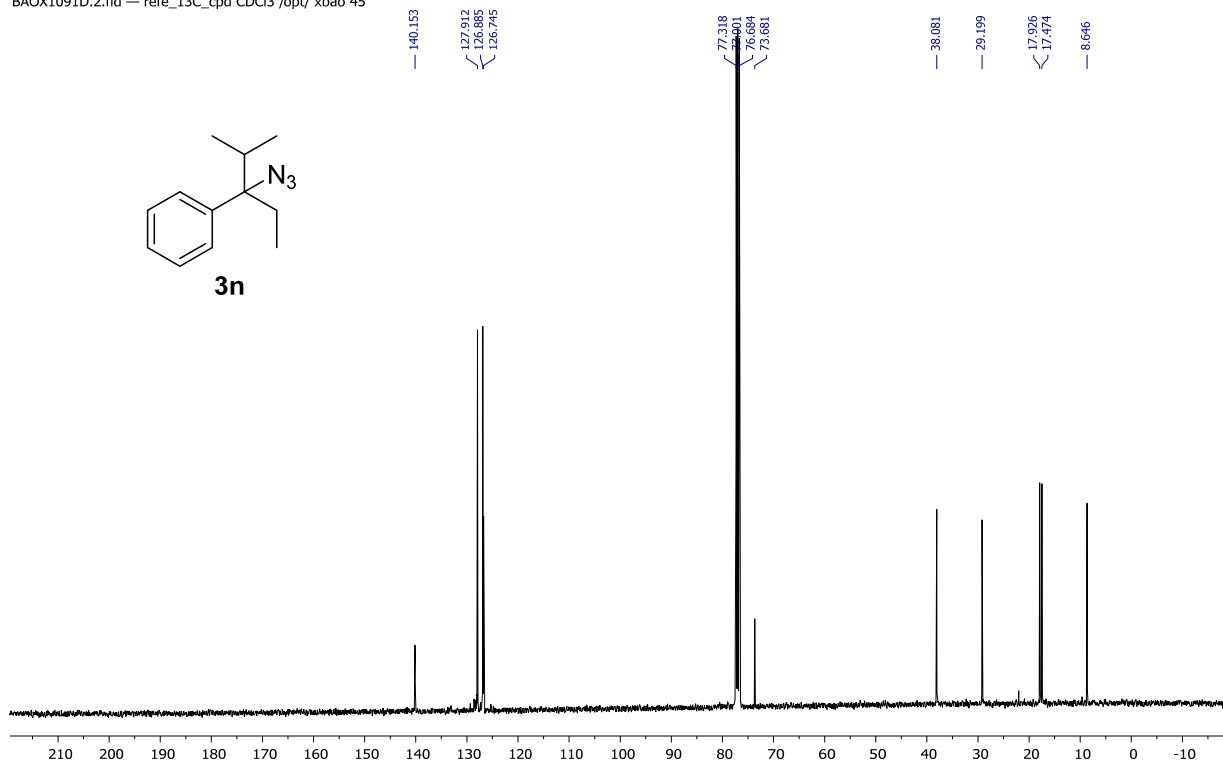

Supplementary Figure 52.  $^1\text{H}$  and  $^{13}\text{C}$  NMR spectra of **3n**

BAOX1094D.1.fid — ChemInfo\_1Hzg CDCl3 /opt/ xbao 9

7.320  
7.318  
7.316  
7.238  
7.235  
7.225  
7.222  
7.220  
7.214  
7.212  
7.208  
7.206  
7.204  
7.198  
7.191  
7.189  
7.184  
7.180  
7.166  
7.165  
7.162  
7.114  
7.112  
7.111  
7.107  
7.103  
7.101  
7.096  
7.096  
7.086  
7.077  
7.050  
7.046  
7.041  
7.033  
7.029  
7.025  
2.564  
2.546  
2.534  
2.530  
2.519  
2.500  
2.490  
2.480  
2.473  
2.273  
2.258  
2.254  
2.245  
2.239  
2.228  
2.214  
2.211  
2.197  
2.188  
2.174  
2.169  
2.162  
2.156  
2.149  
2.144  
2.134  
2.128  
2.124  
2.114  
2.109  
2.093  
2.000  
1.972  
1.964  
1.952  
1.946  
1.934  
1.928  
1.915  
1.897  
1.885  
1.855  
1.0736  
0.718

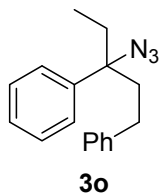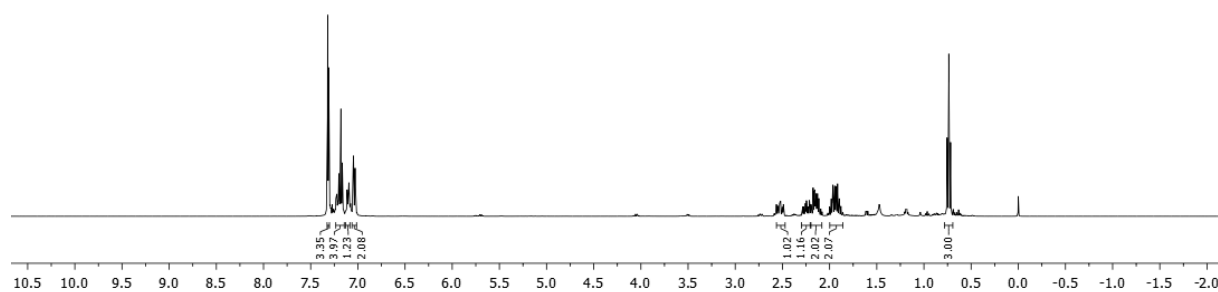

BAOX1094D.2.fid — ChemInfo\_13C\_cpd CDCl3 /opt/ xbao 9

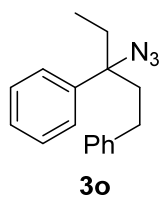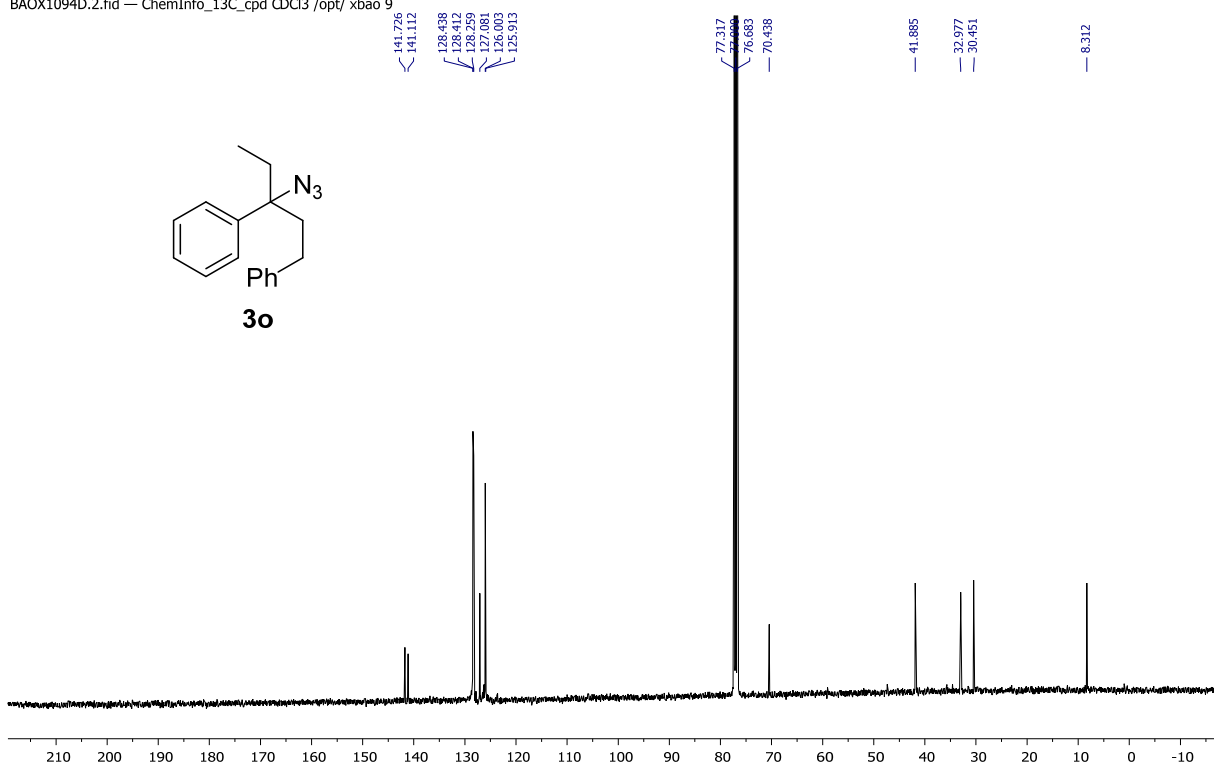

Supplementary Figure 53.  $^1\text{H}$  and  $^{13}\text{C}$  NMR spectra of **3o**

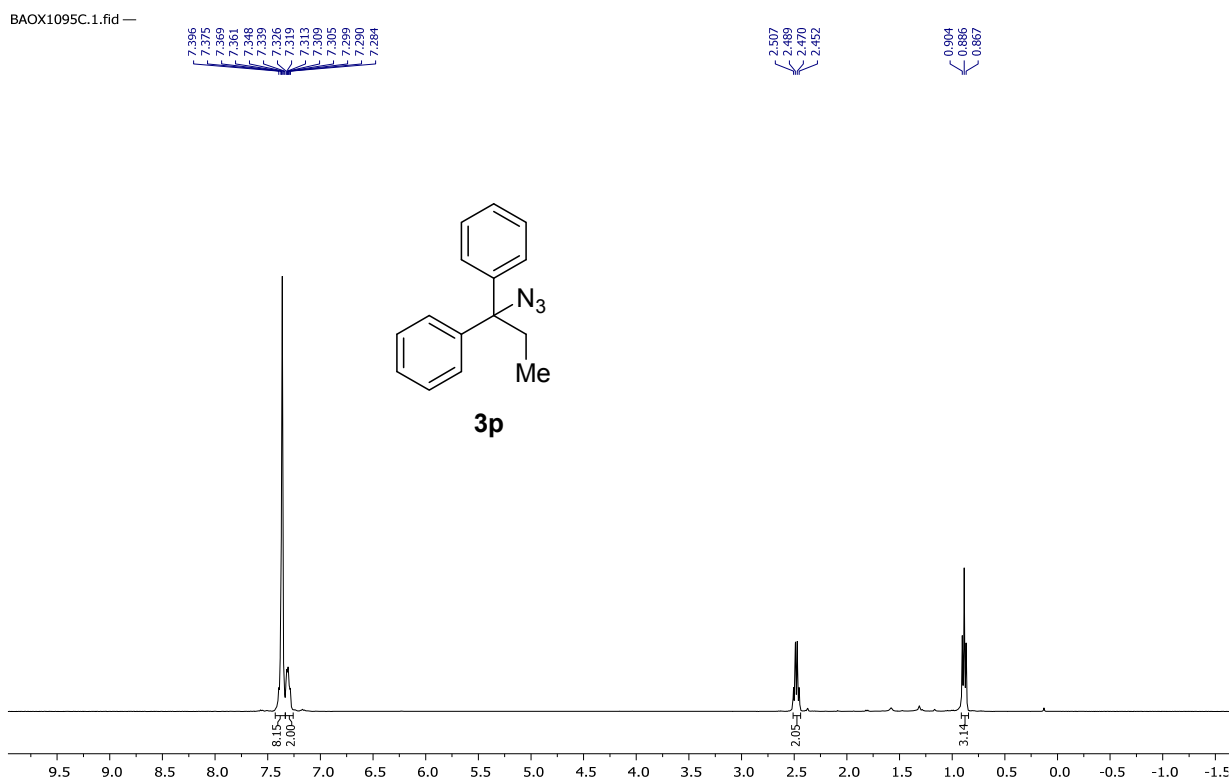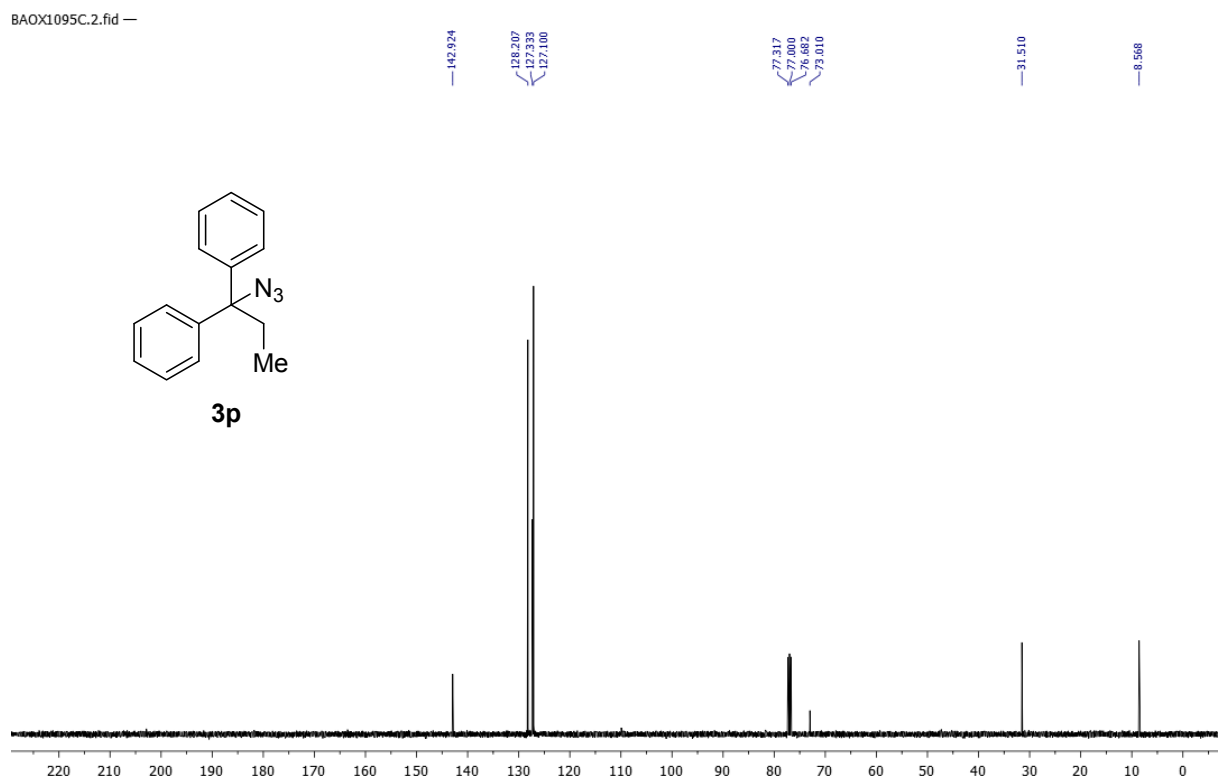

Supplementary Figure 54.  $^1\text{H}$  and  $^{13}\text{C}$  NMR spectra of **3p**

BAOX1098A.1.fid —

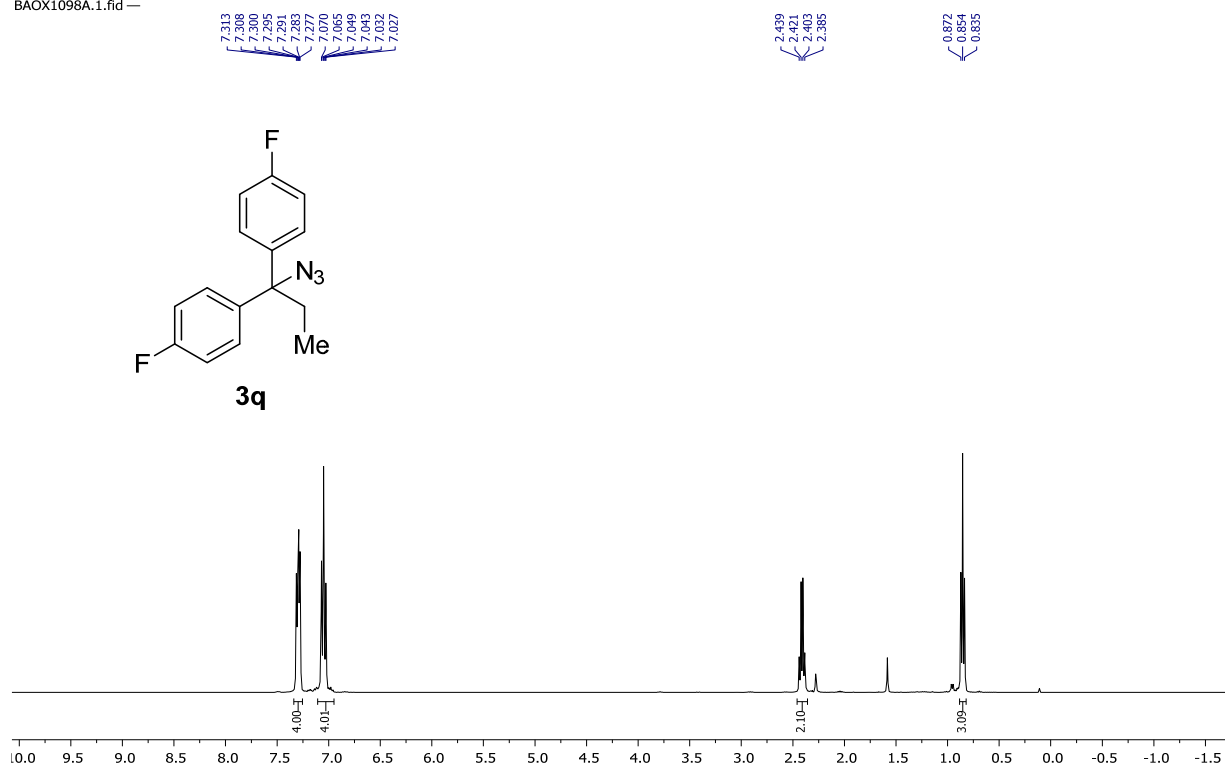

BAOX1098A.2.fid —

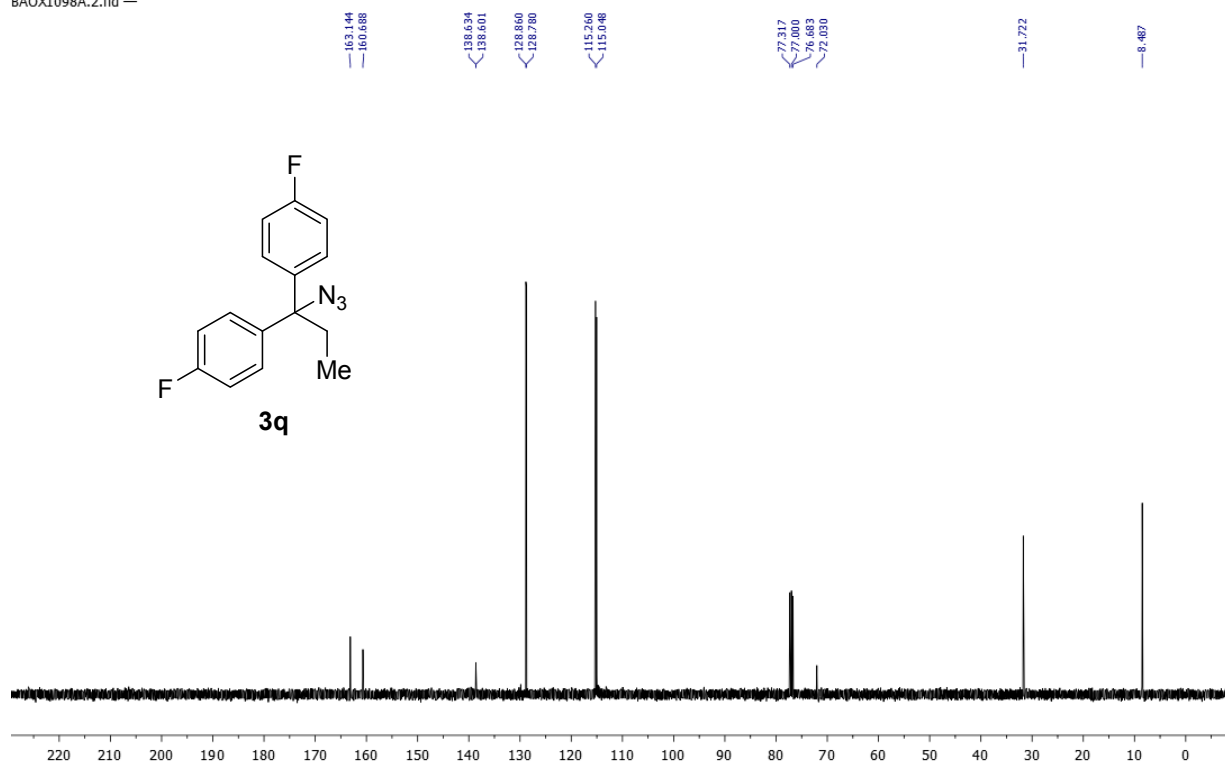

Supplementary Figure 55. <sup>1</sup>H and <sup>13</sup>C NMR spectra of **3q**



BAOX1096B.1.fid —

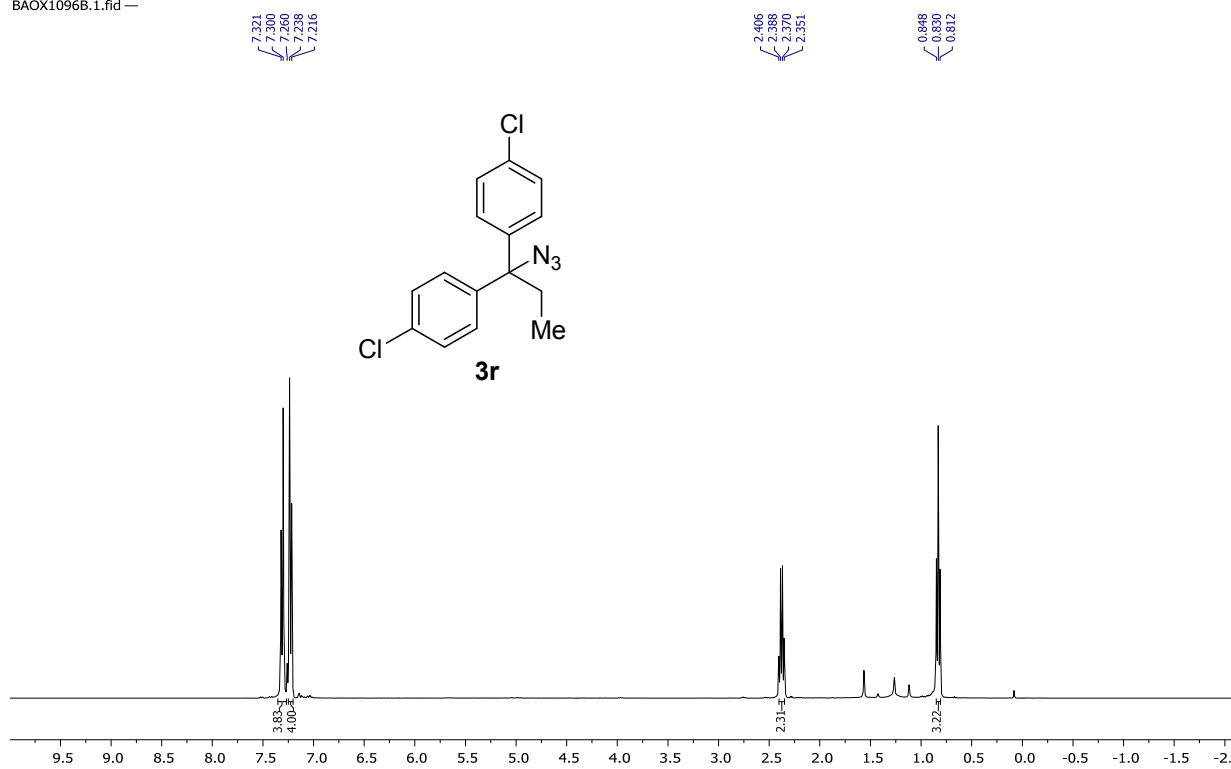

BAOX1096B.2.fid —

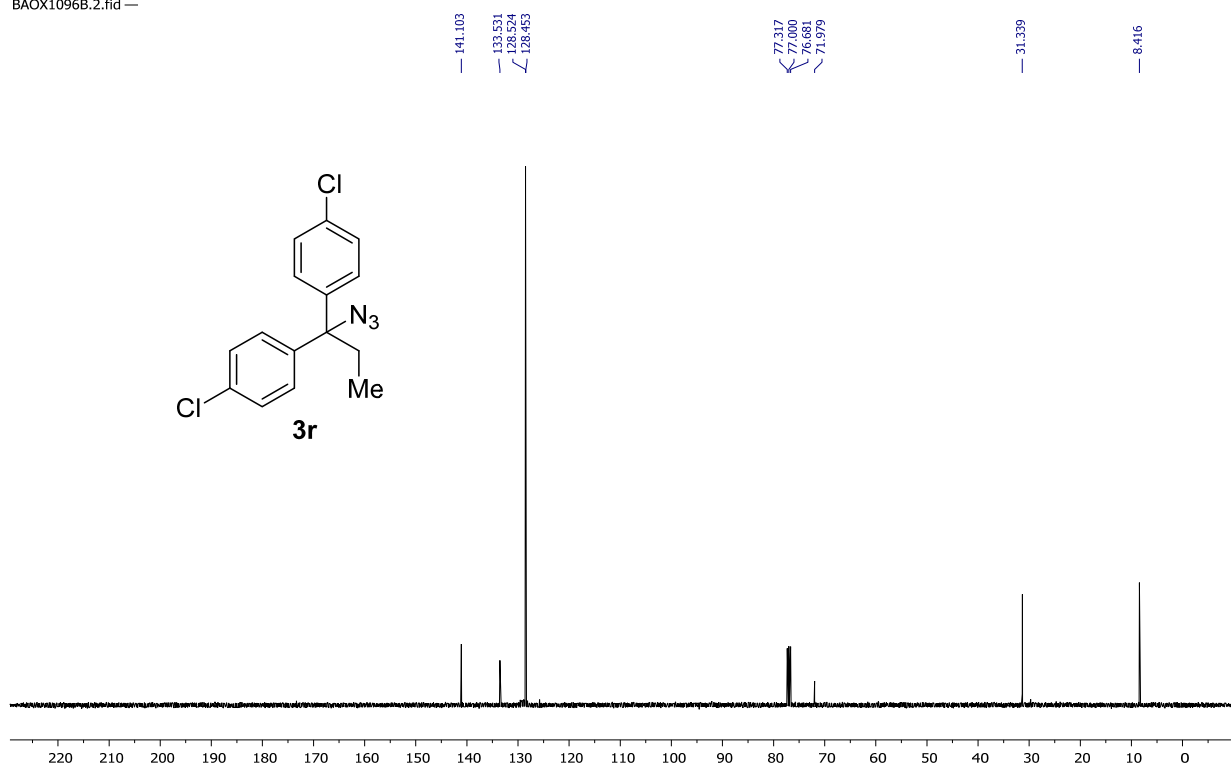

Supplementary Figure 56. <sup>1</sup>H and <sup>13</sup>C NMR spectra of **3r**

BAOX1098B.1.fid —

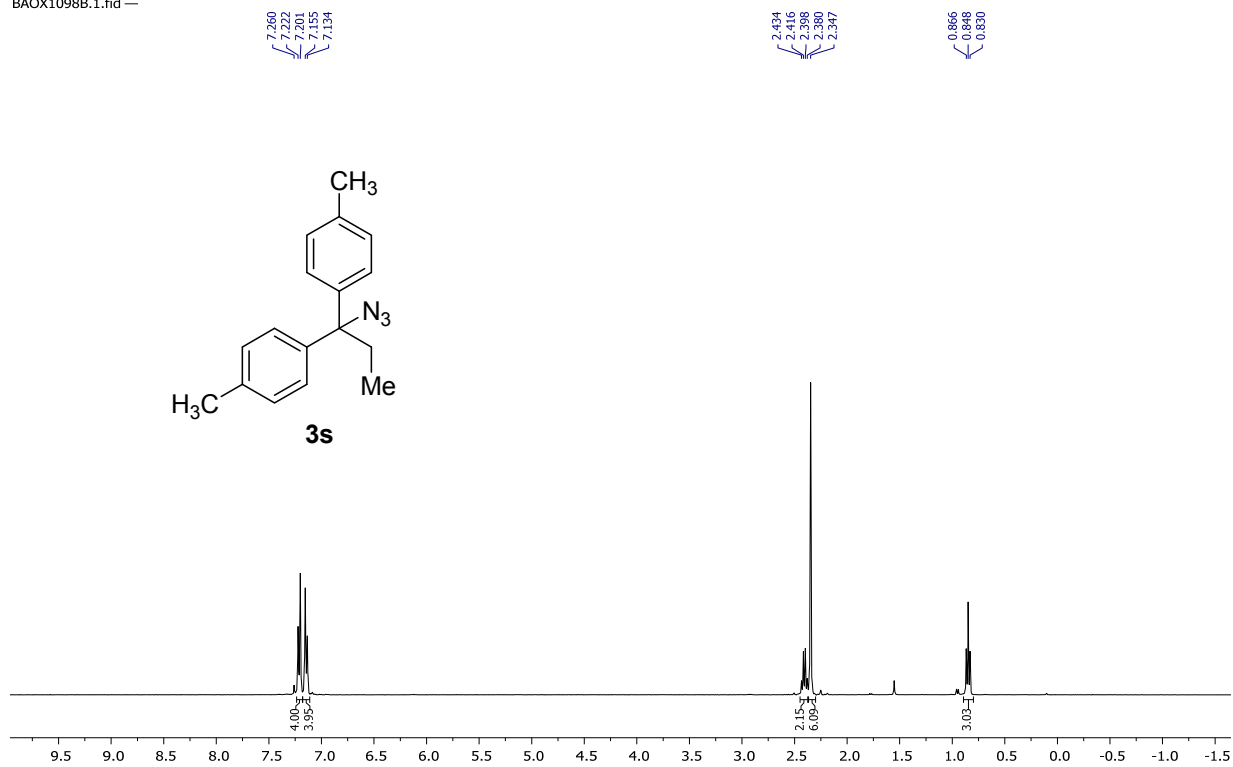

BAOX1098B.2.fid —

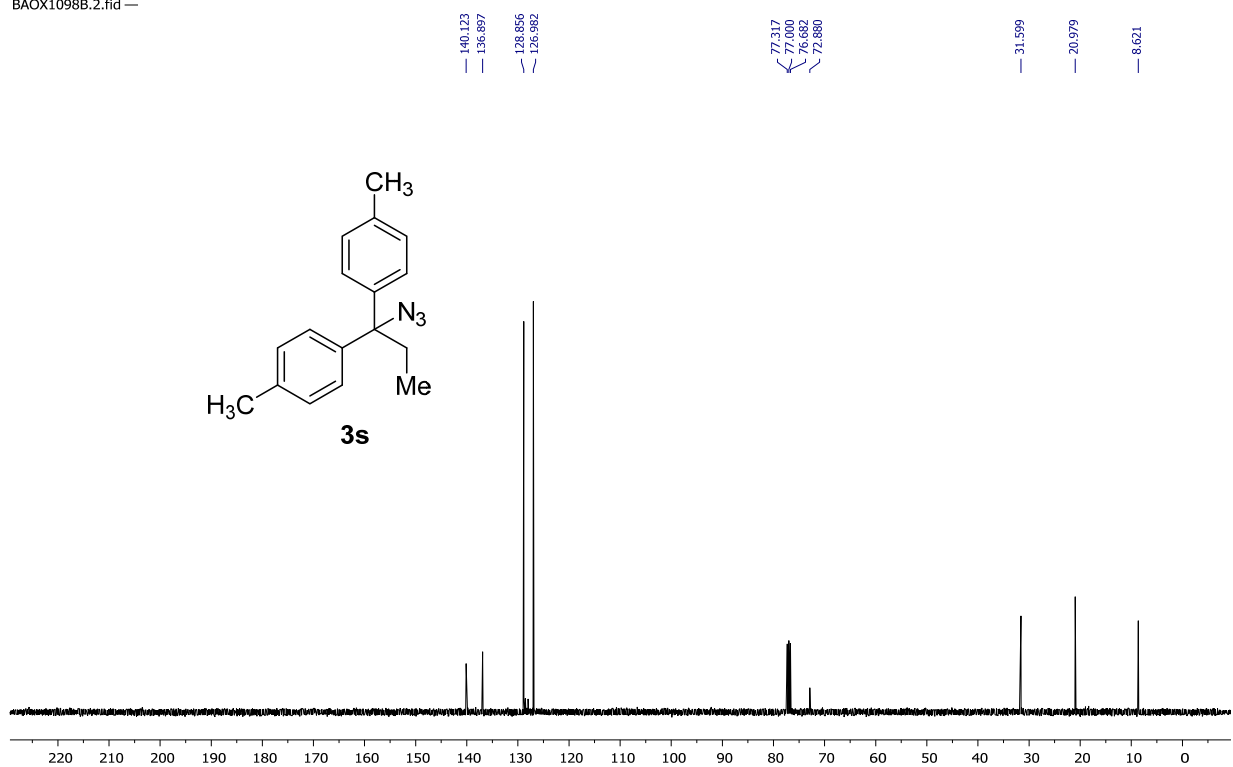

Supplementary Figure 57. <sup>1</sup>H and <sup>13</sup>C NMR spectra of **3s**

BAOX1098C.1.fid —

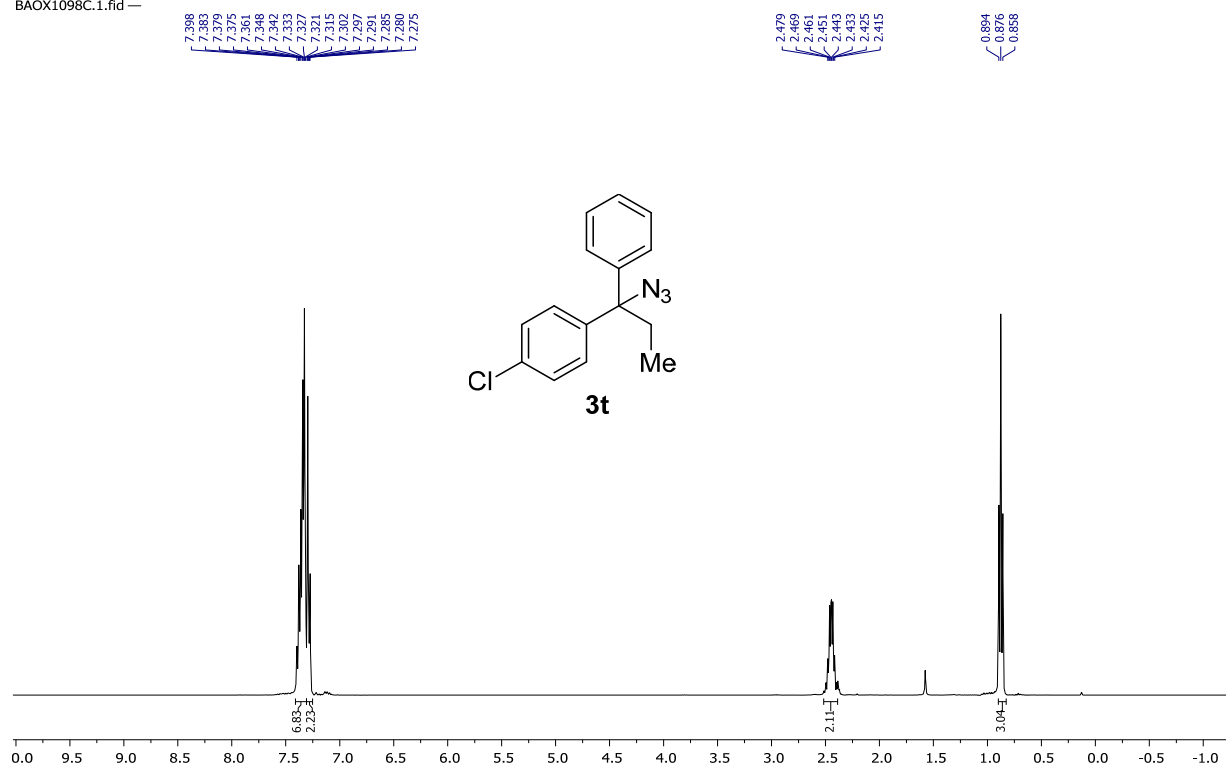

BAOX1098C.2.fid —

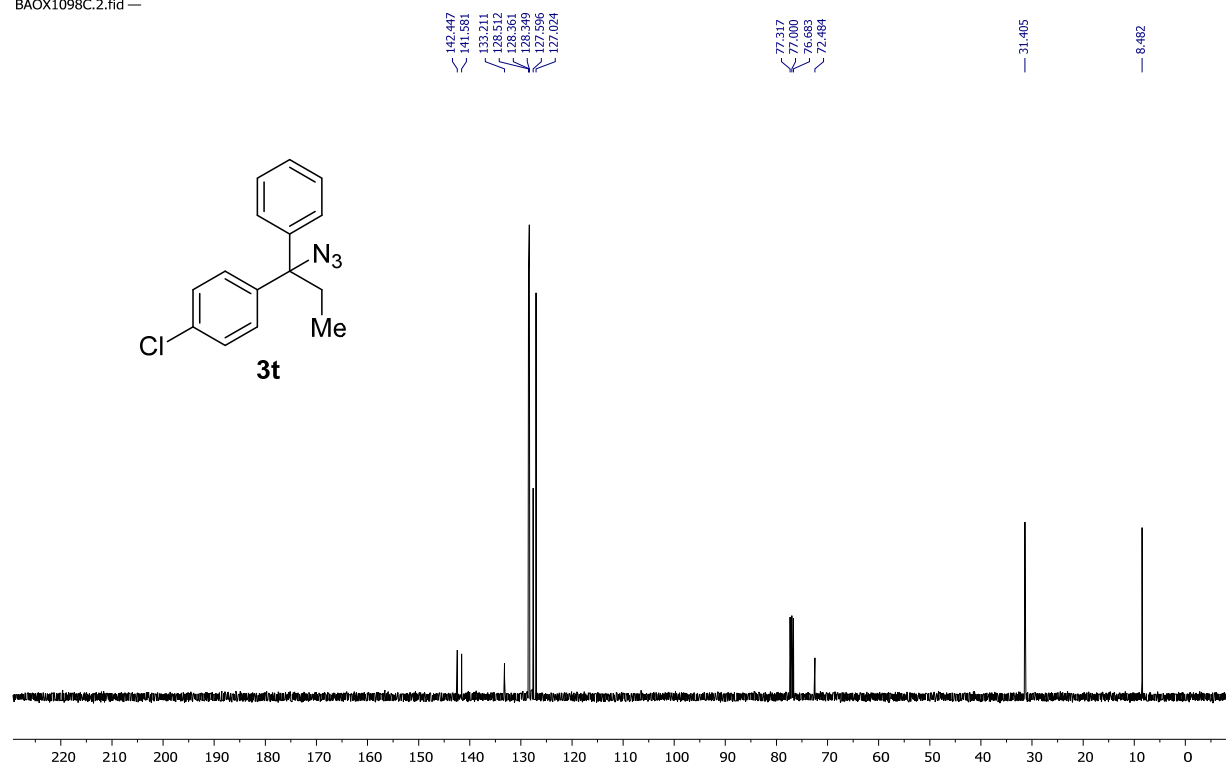

Supplementary Figure 58. <sup>1</sup>H and <sup>13</sup>C NMR spectra of **3t**

BAOX1098D.1.fid —

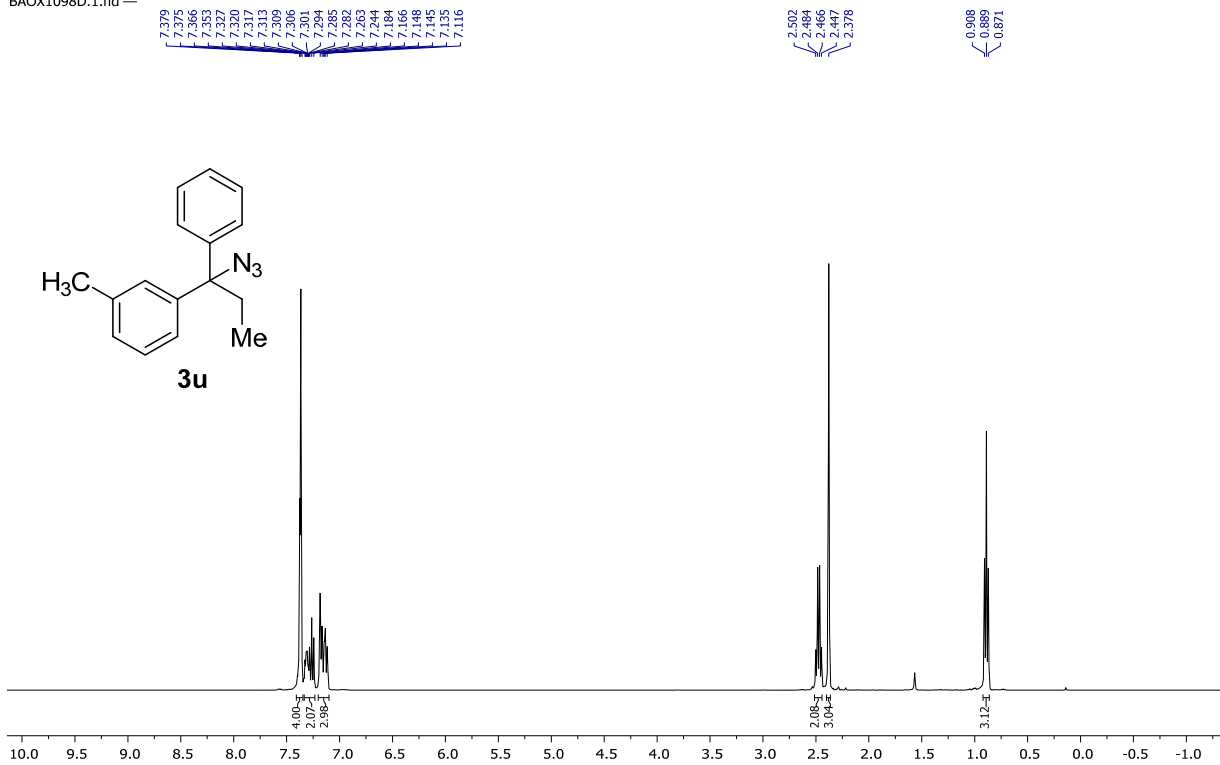

BAOX1098D.2.fid —

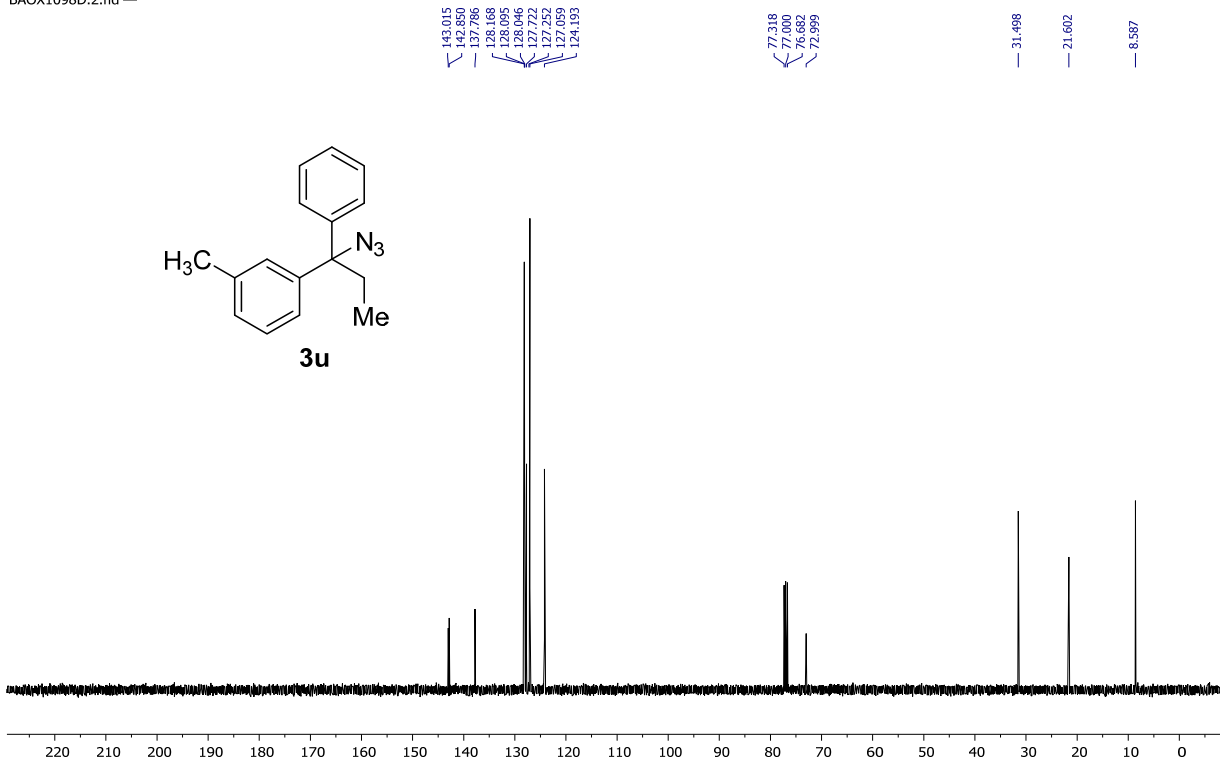

Supplementary Figure 59. <sup>1</sup>H and <sup>13</sup>C NMR spectra of **3u**

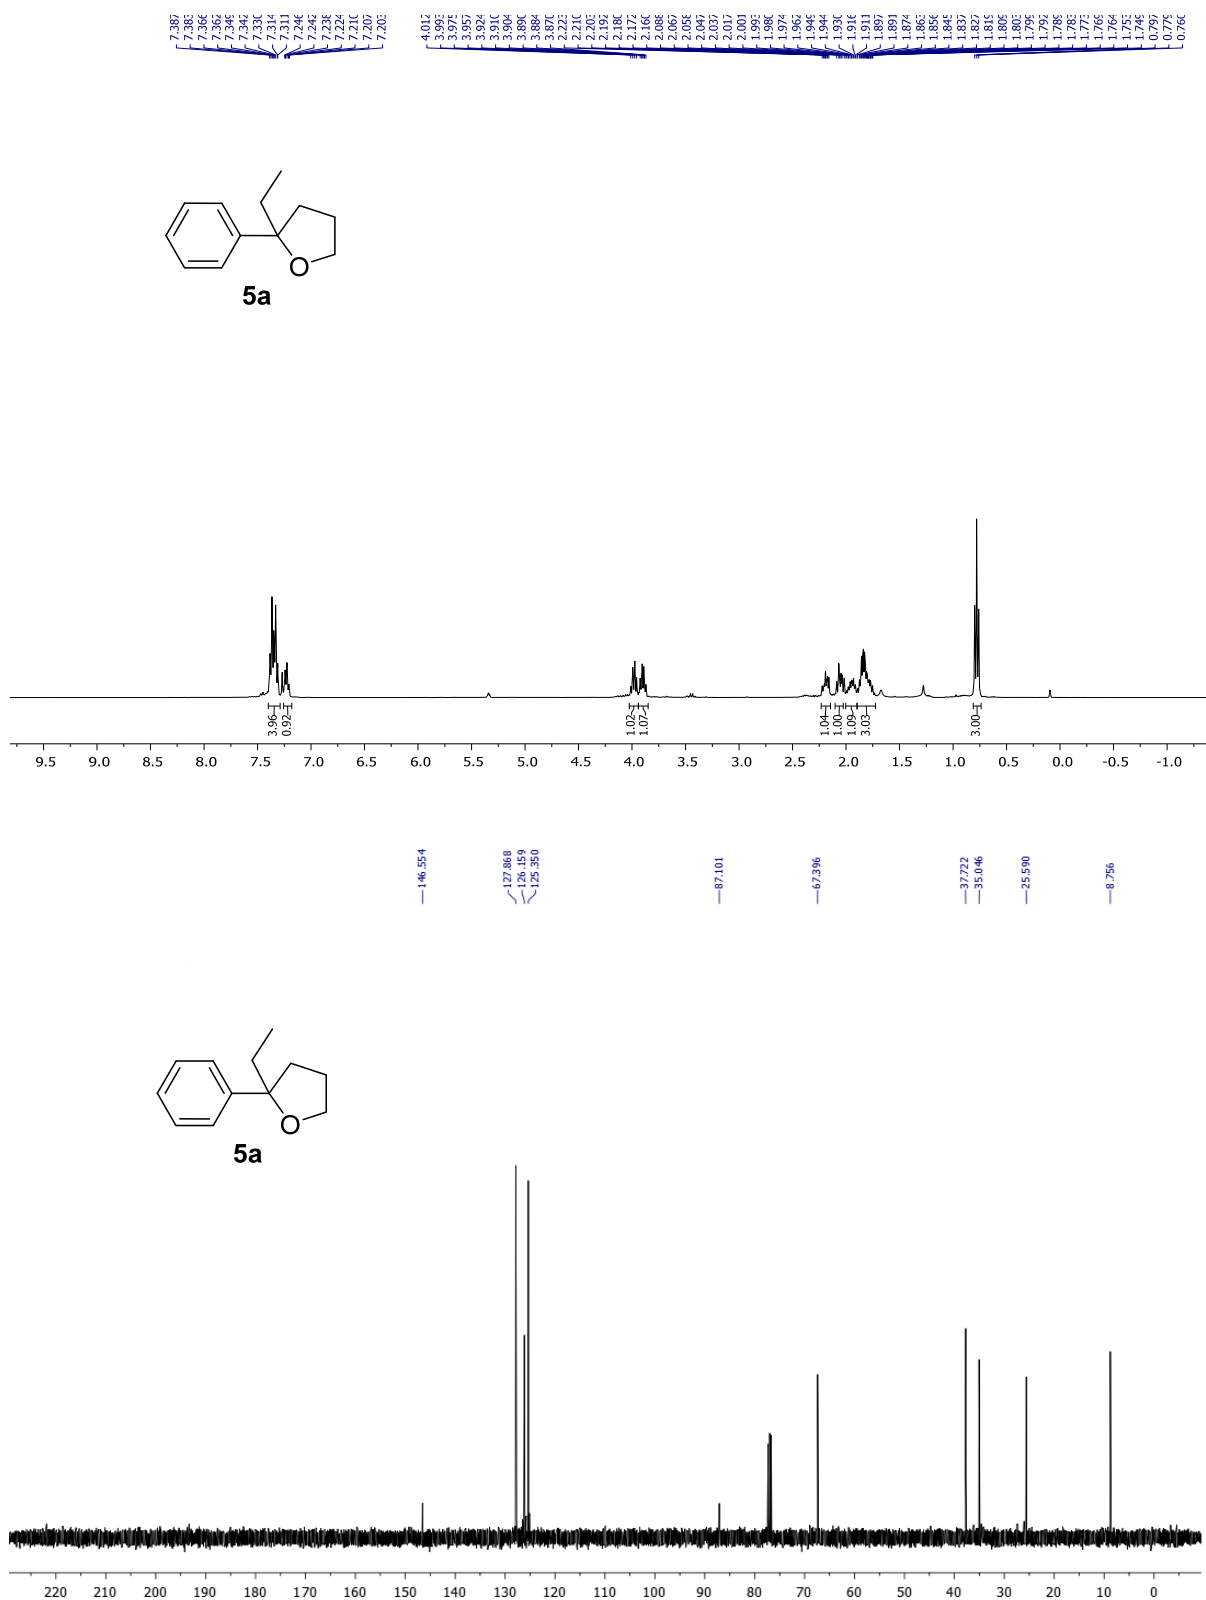

Supplementary Figure 60. <sup>1</sup>H and <sup>13</sup>C NMR spectra of 5a

BAOX1115A-2.1.fid

7.175  
7.156  
7.136  
7.094  
3.903  
3.887  
3.886  
3.883  
3.869  
3.867  
3.867  
3.848  
3.815  
3.801  
3.795  
3.781  
3.775  
3.751  
3.745  
2.111  
2.099  
2.091  
2.090  
2.081  
2.079  
2.069  
2.069  
2.050  
1.966  
1.945  
1.936  
1.925  
1.915  
1.896  
1.896  
1.876  
1.873  
1.869  
1.866  
1.861  
1.858  
1.855  
1.846  
1.846  
1.843  
1.840  
1.837  
1.834  
1.832  
1.832  
1.825  
1.825  
1.823  
1.819  
1.813  
1.811  
1.811  
1.807  
1.805  
1.797  
1.776  
1.760  
1.757  
1.751  
1.741  
1.741  
1.732  
1.732  
1.722  
1.722  
1.705  
1.705  
1.702  
1.696  
1.692  
1.685  
1.682  
1.680  
1.680  
1.672  
1.672  
1.666  
1.655  
1.652  
0.702  
0.684  
0.665

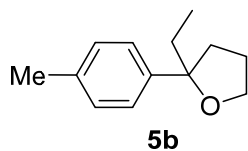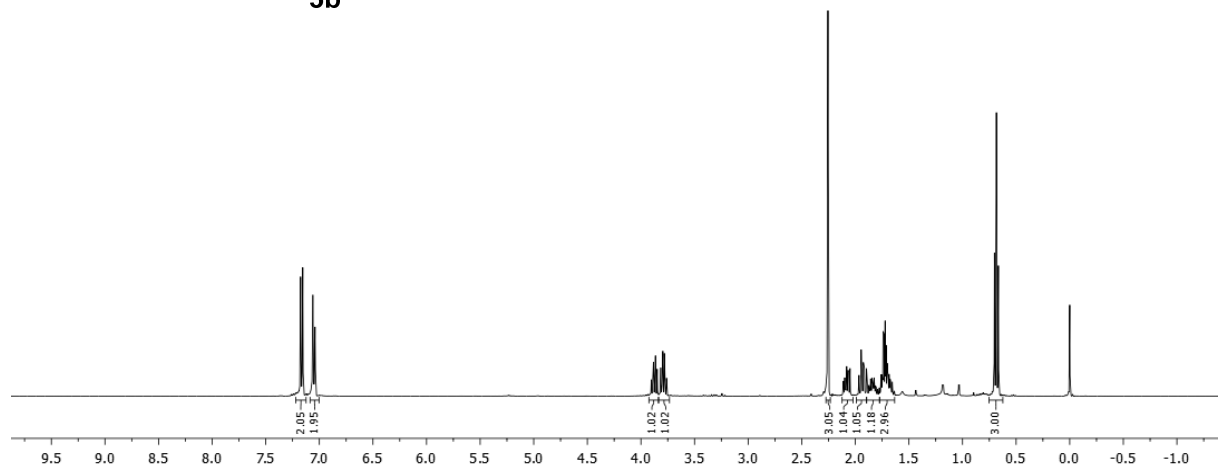

BAOX1115A-2.2.fid

143.523  
135.630  
128.594  
125.304  
87.039  
77.317  
77.000  
76.683  
67.334  
37.639  
35.073  
25.587  
20.954  
8.801

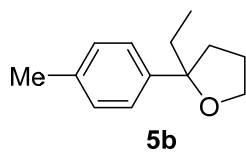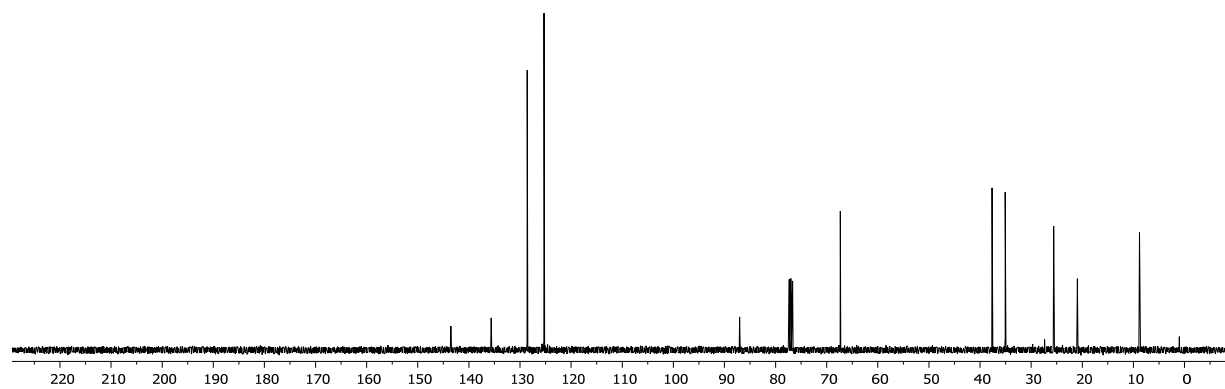

Supplementary Figure 61.  $^1\text{H}$  and  $^{13}\text{C}$  NMR spectra of **5b**

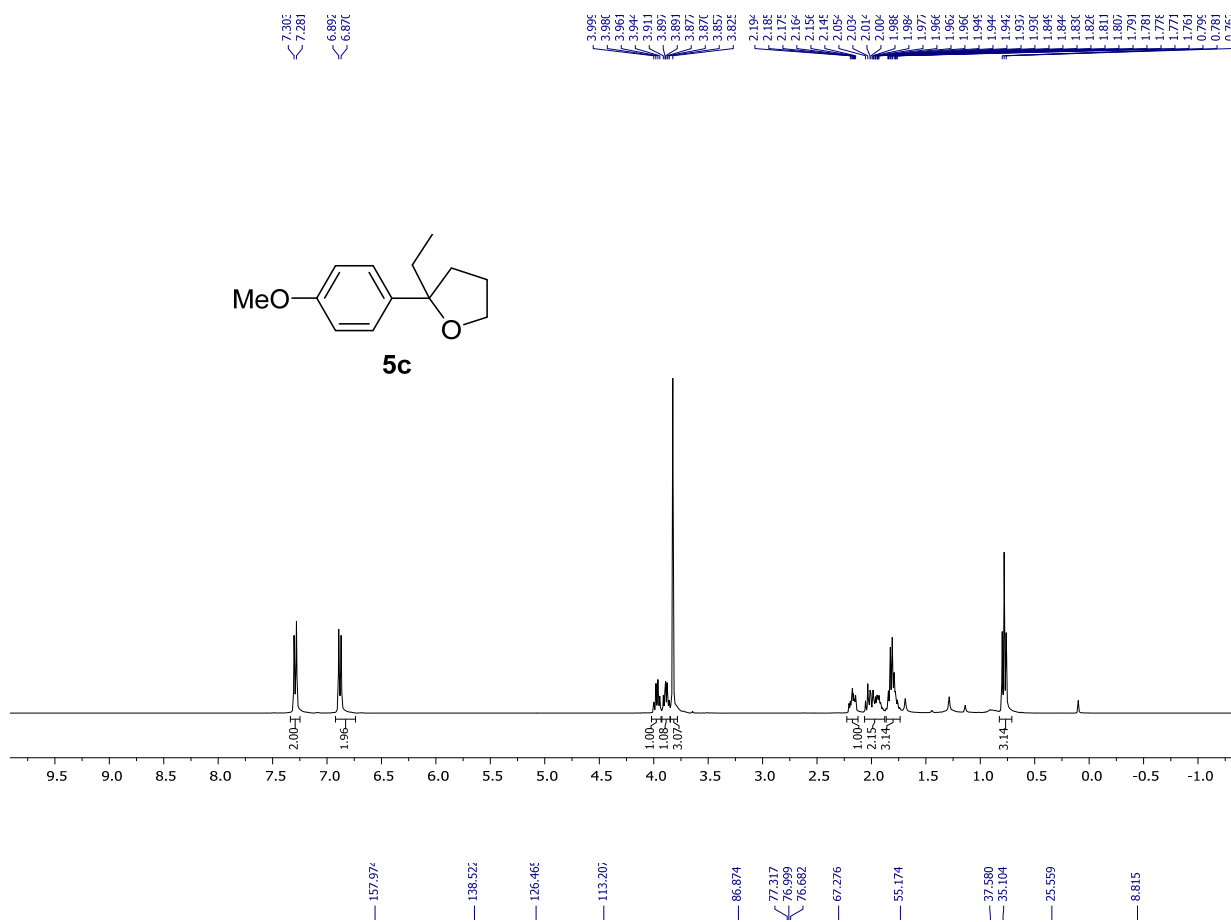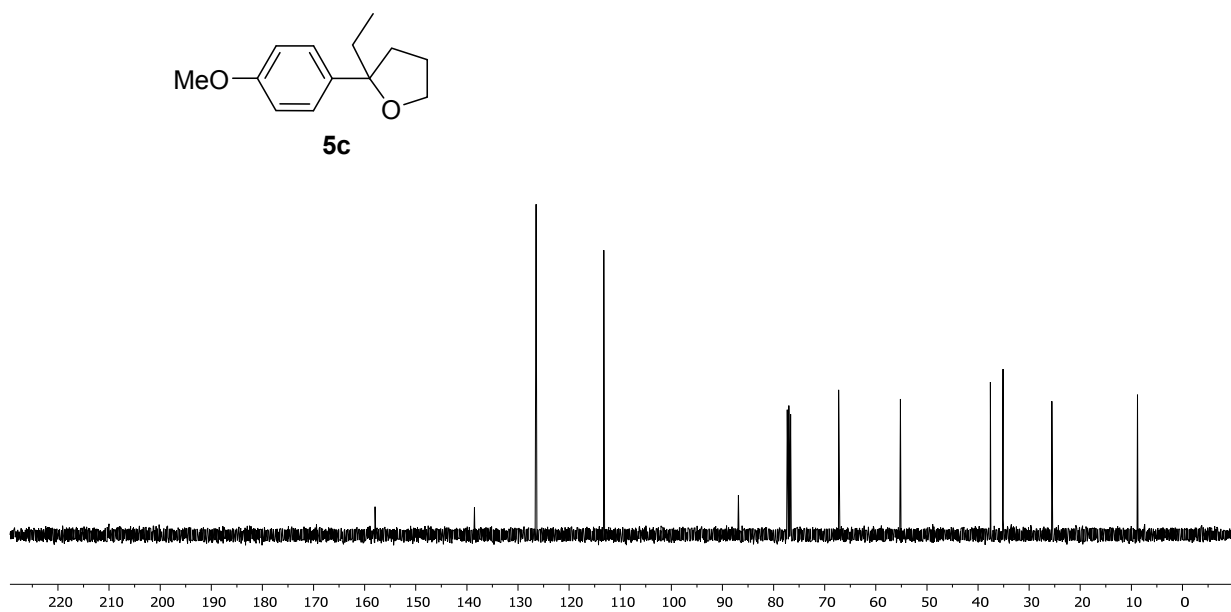

Supplementary Figure 62. <sup>1</sup>H and <sup>13</sup>C NMR spectra of **5c**

BAOX1115B-2.1.fid —

7.324  
7.310  
7.303  
7.289  
6.990  
6.968

3.981  
3.964  
3.961  
3.944  
3.926  
3.888  
3.874  
3.868  
3.858  
3.847  
3.834  
2.149  
2.141  
2.141  
2.118  
2.111  
2.099  
2.059  
2.039  
2.019  
2.009  
1.983  
1.949  
1.936  
1.930  
1.923  
1.917  
1.911  
1.899  
1.819  
1.815  
1.803  
1.800  
1.796  
1.783  
1.765  
1.759  
1.746  
1.730  
1.764  
0.745  
0.777

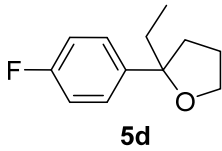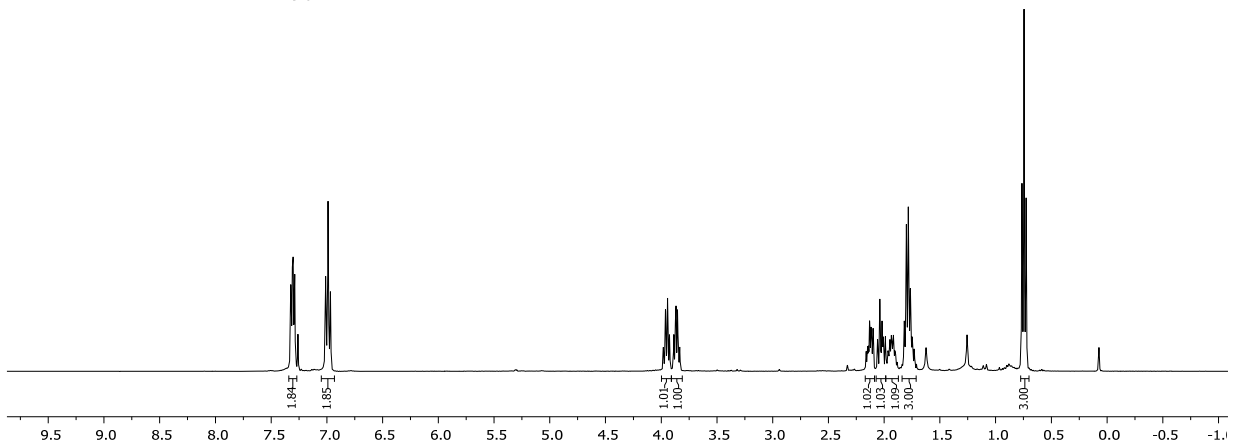

BAOX1115B-2.2.fid —

162.649  
160.225  
142.227  
142.196  
126.976  
126.898  
114.685  
114.474  
86.799  
77.318  
77.065  
76.883  
67.410  
37.821  
35.072  
25.573  
8.708

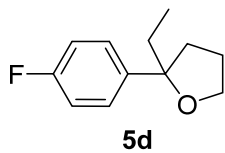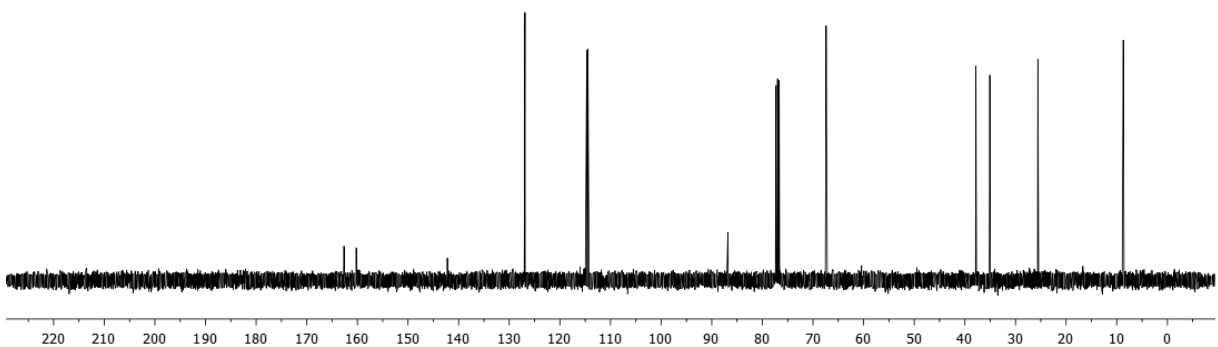

Supplementary Figure 63. <sup>1</sup>H and <sup>13</sup>C NMR spectra of 5d



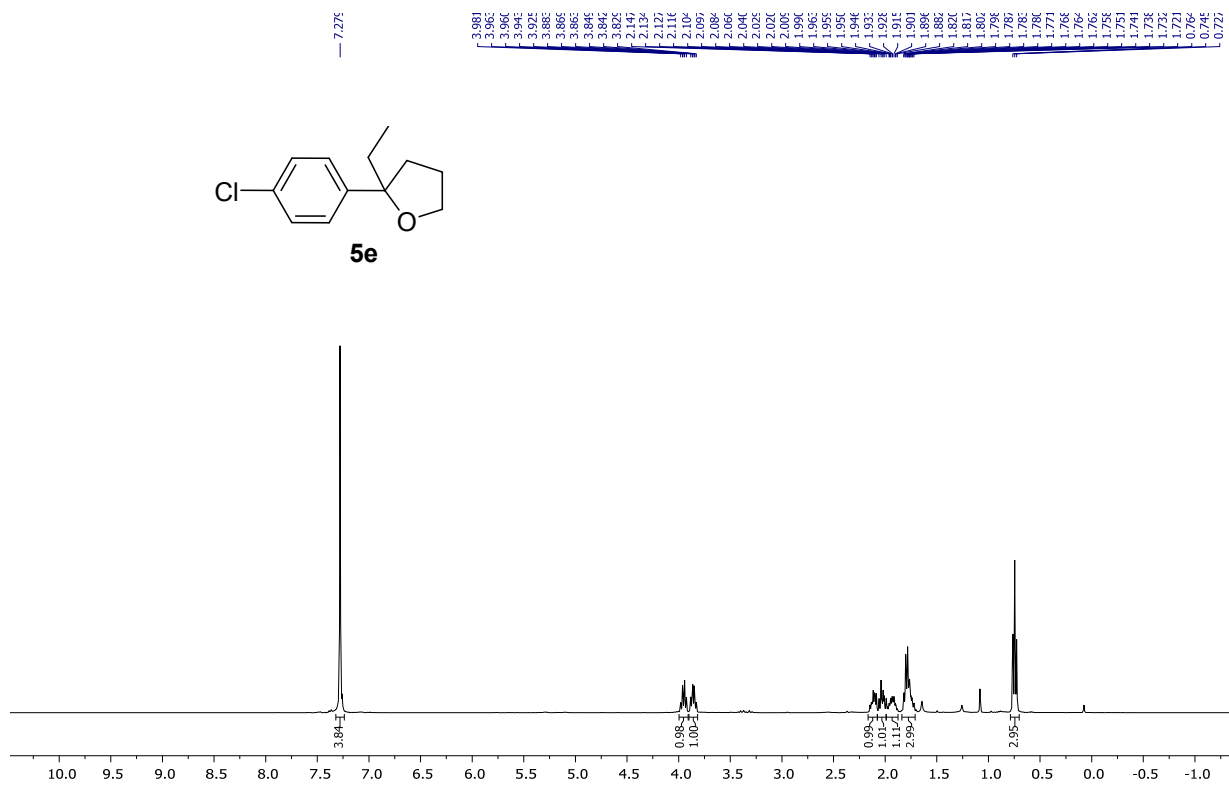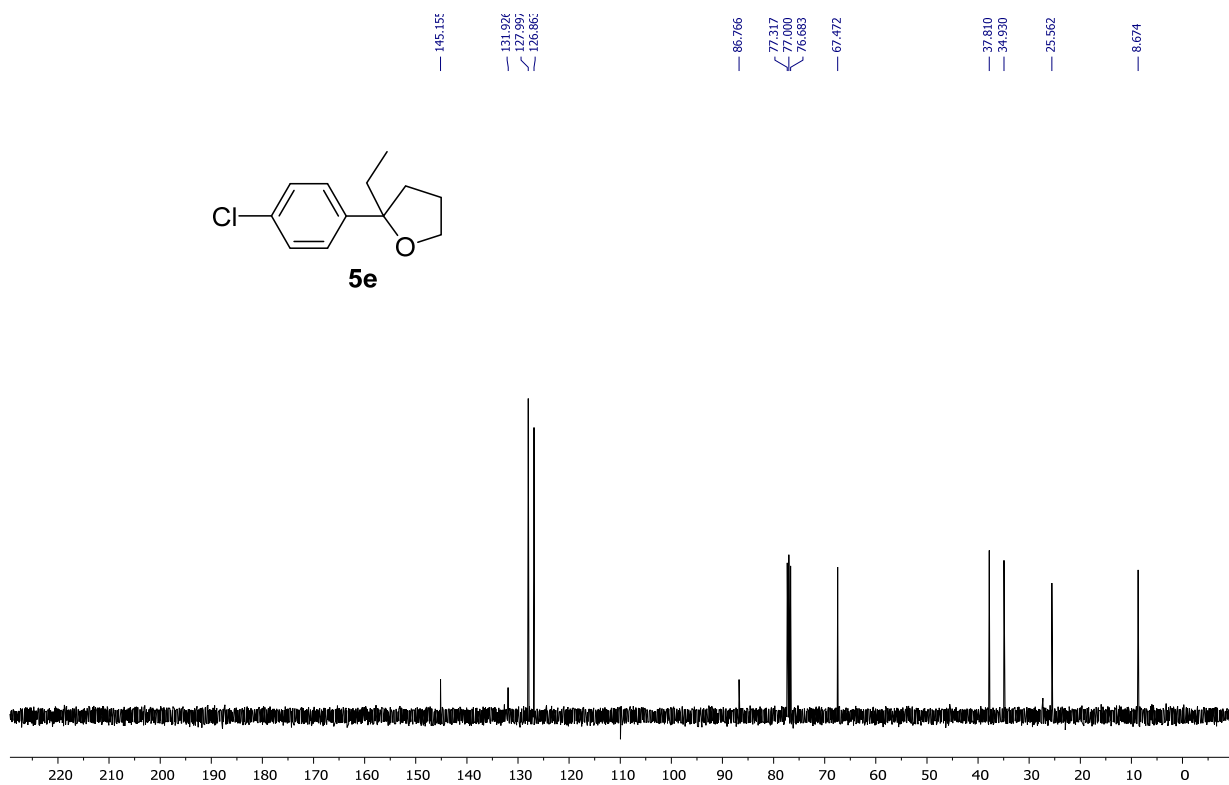

Supplementary Figure 64.  $^1\text{H}$  and  $^{13}\text{C}$  NMR spectra of **5e**

BAOX1115D-2.1.fid —

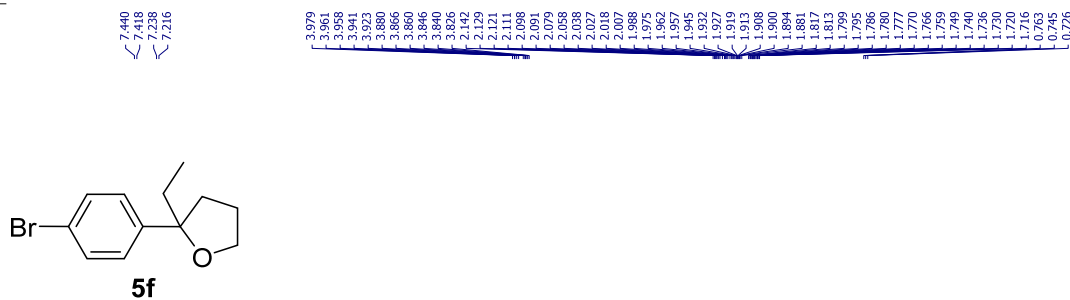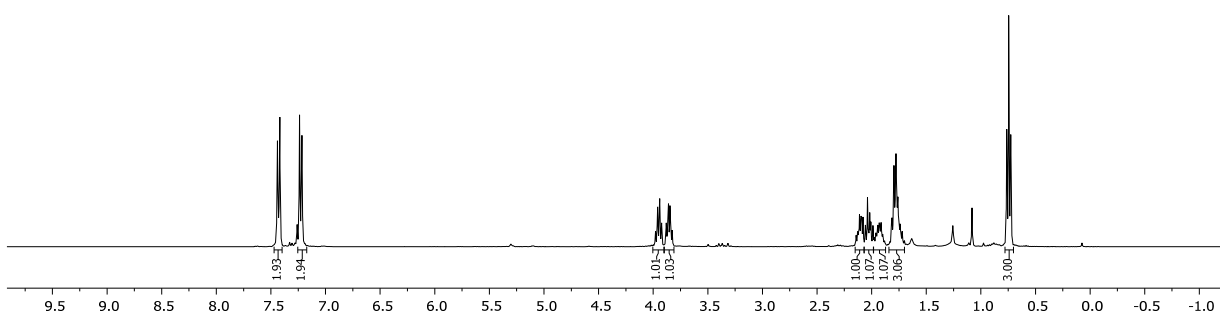

BAOX1115D-2.2.fid —

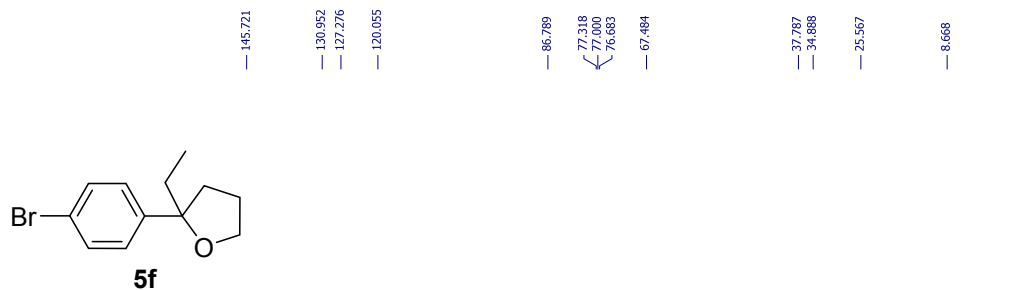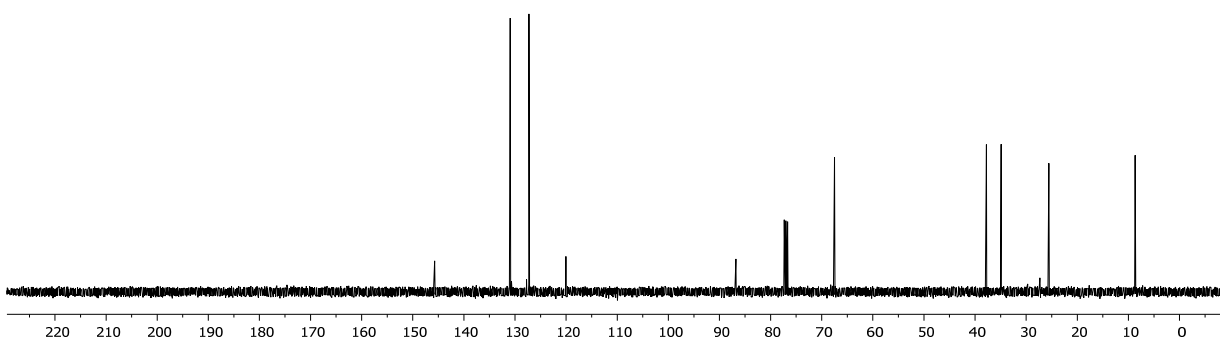

Supplementary Figure 65. <sup>1</sup>H and <sup>13</sup>C NMR spectra of **5f**

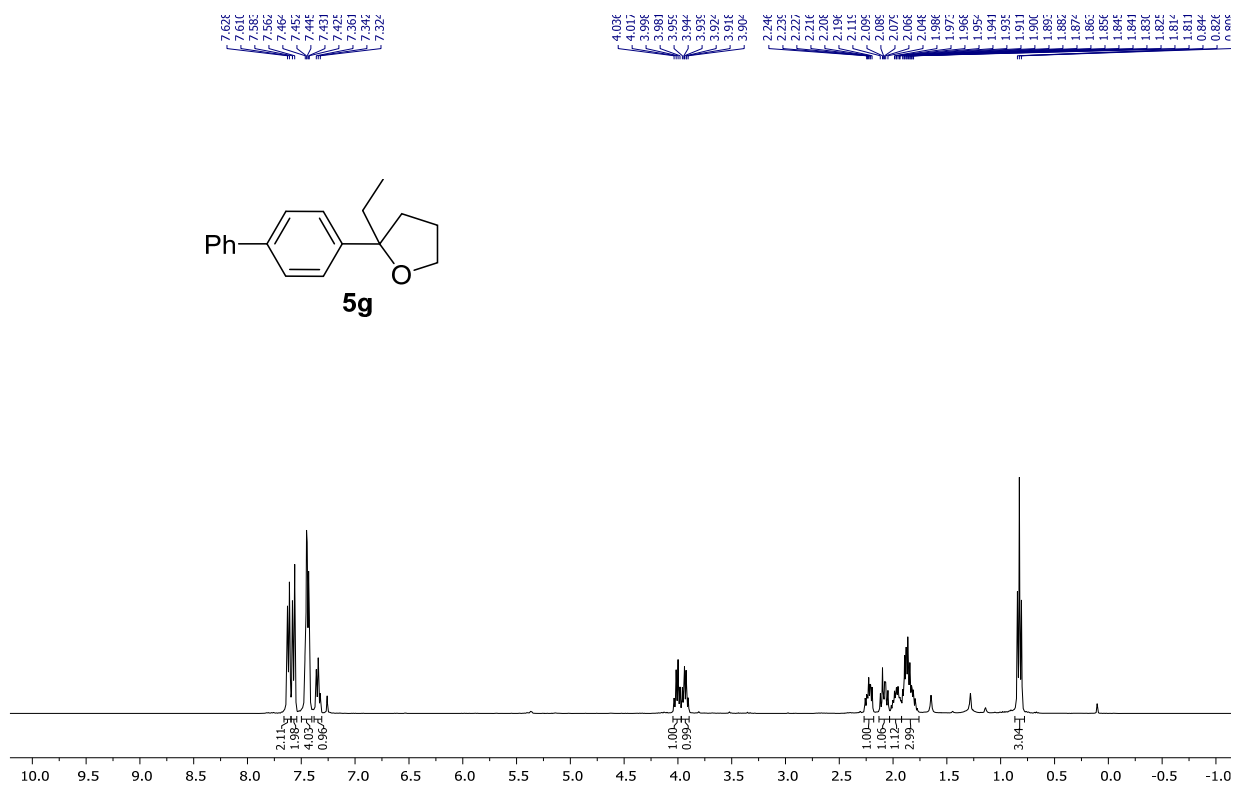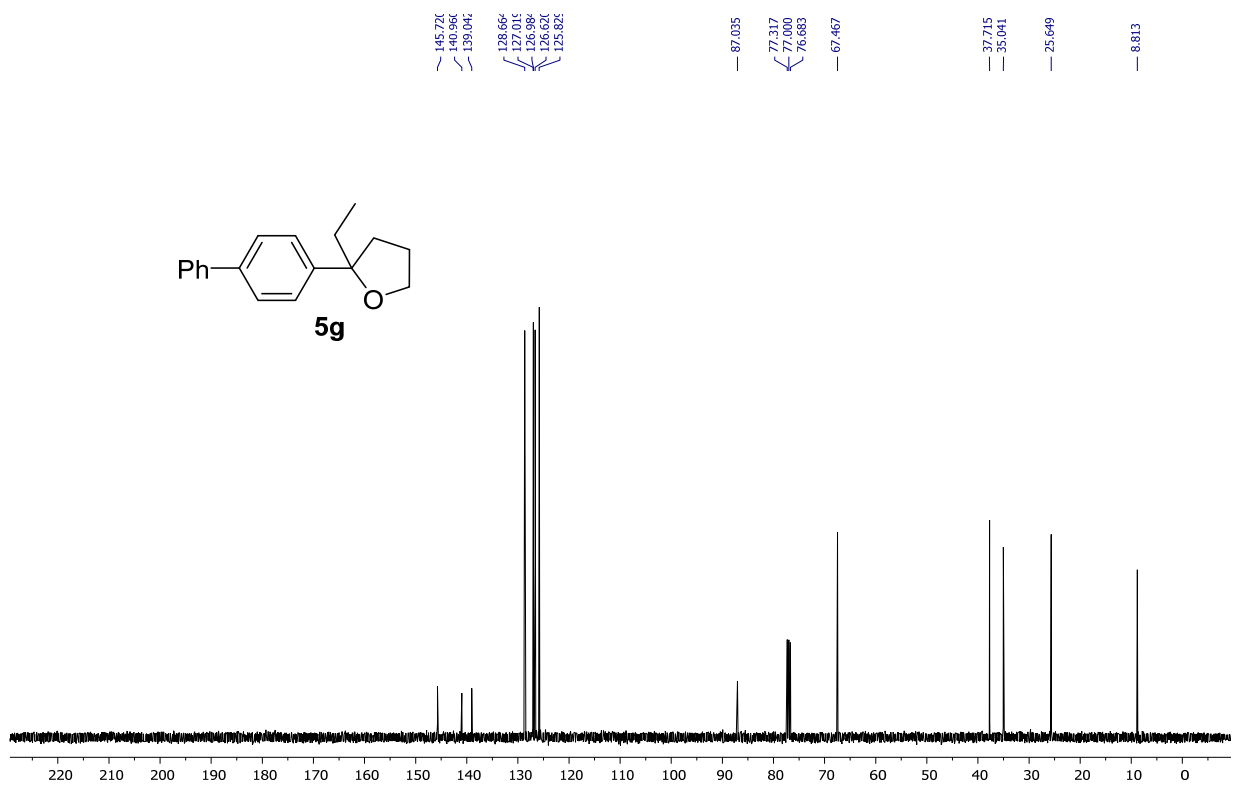

Supplementary Figure 66. <sup>1</sup>H and <sup>13</sup>C NMR spectra of **5g**

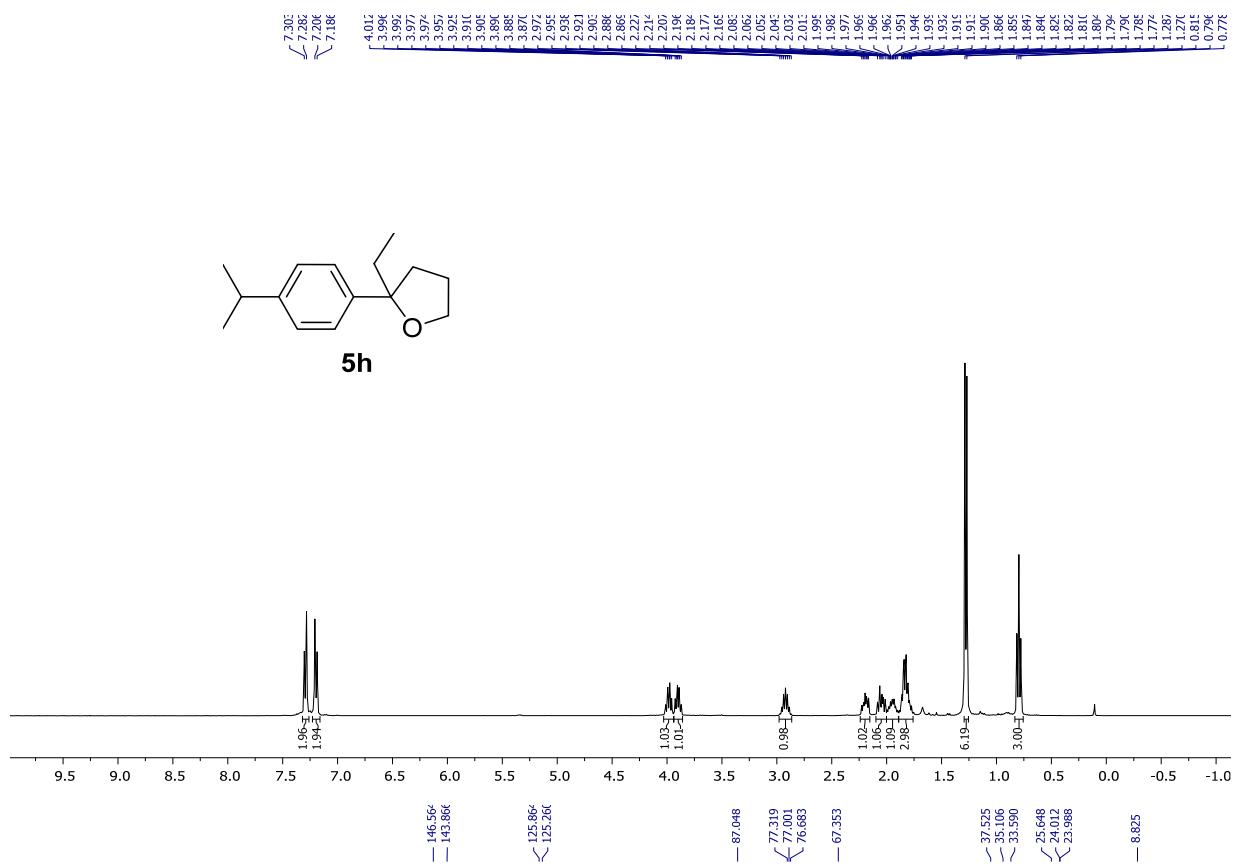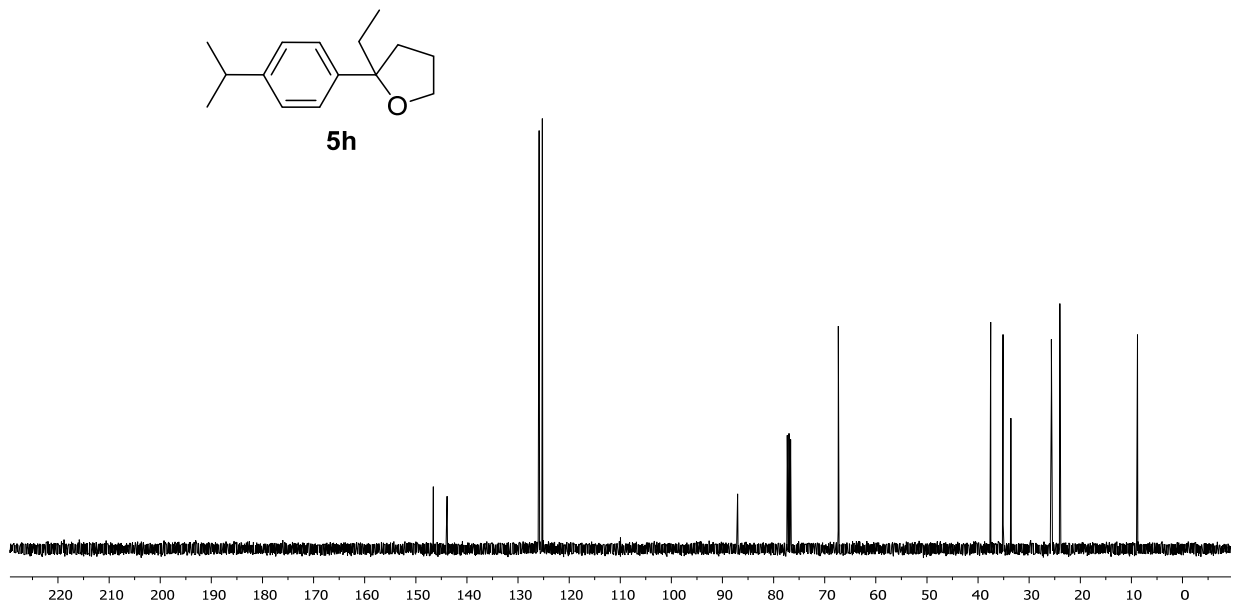

Supplementary Figure 67. <sup>1</sup>H and <sup>13</sup>C NMR spectra of 5h

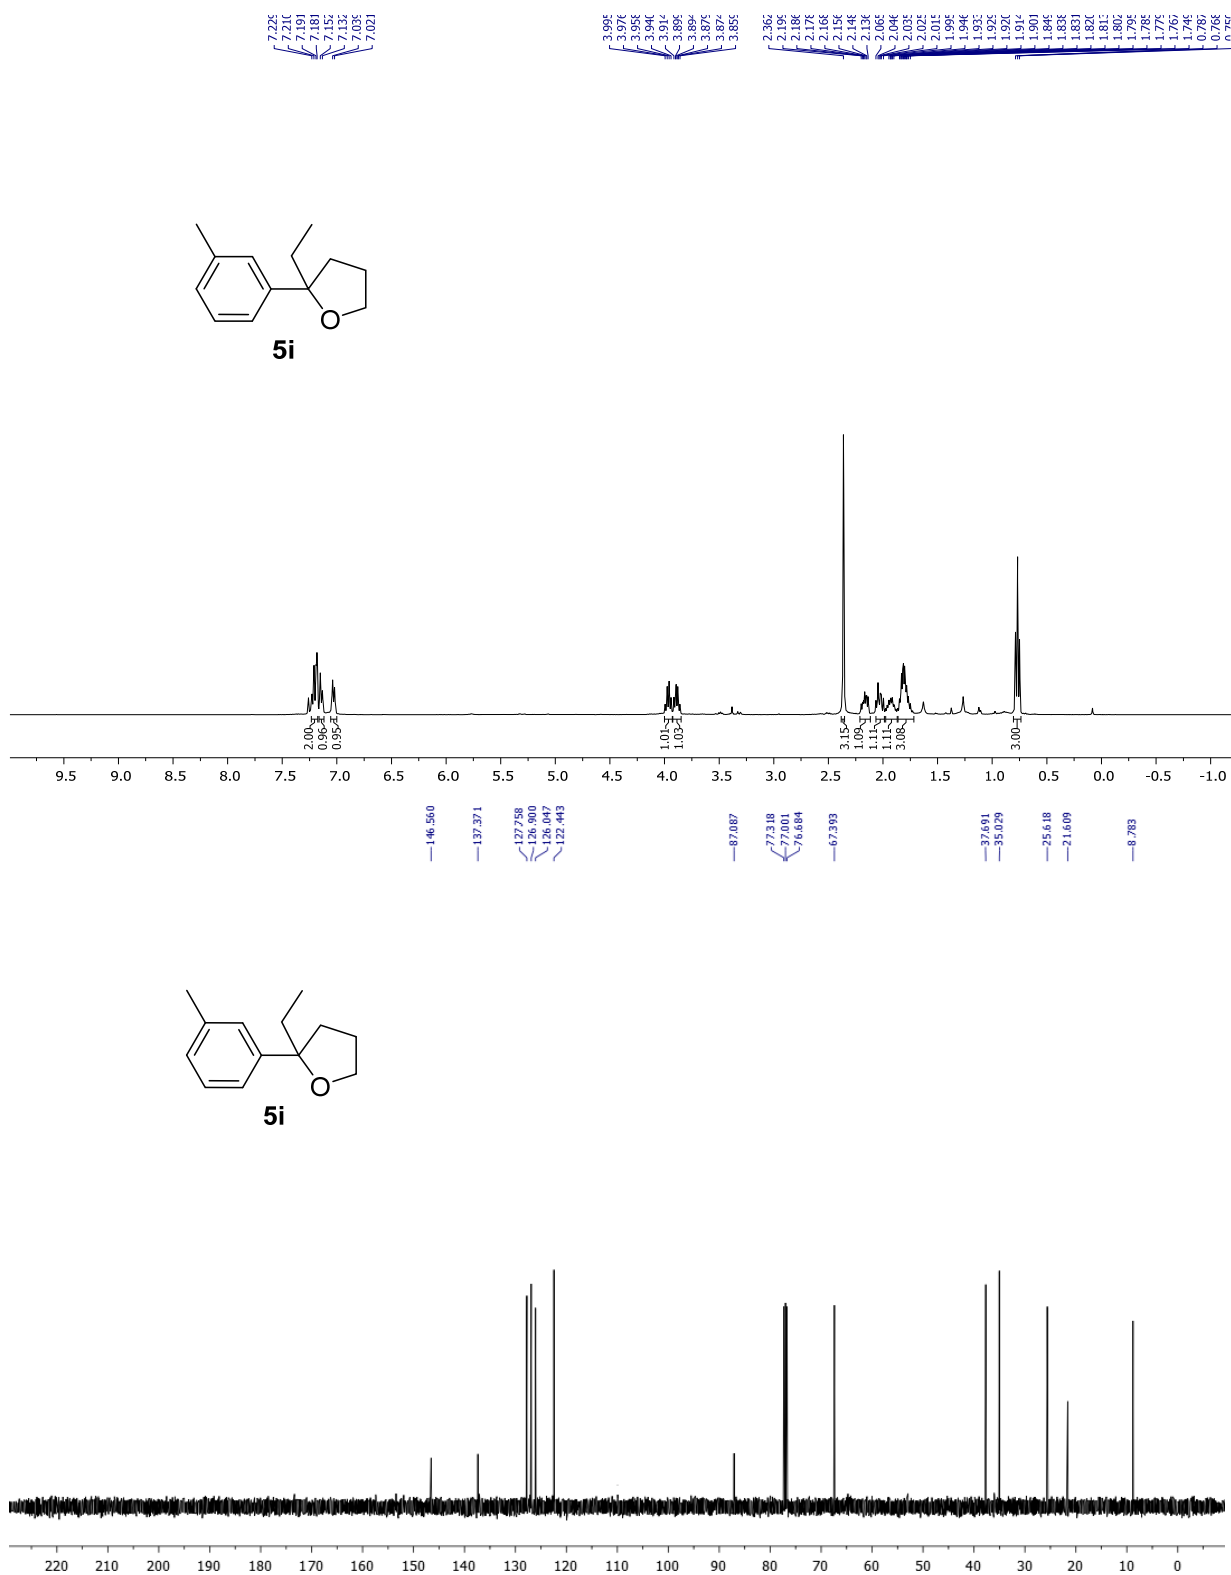

Supplementary Figure 68. <sup>1</sup>H and <sup>13</sup>C NMR spectra of 5i

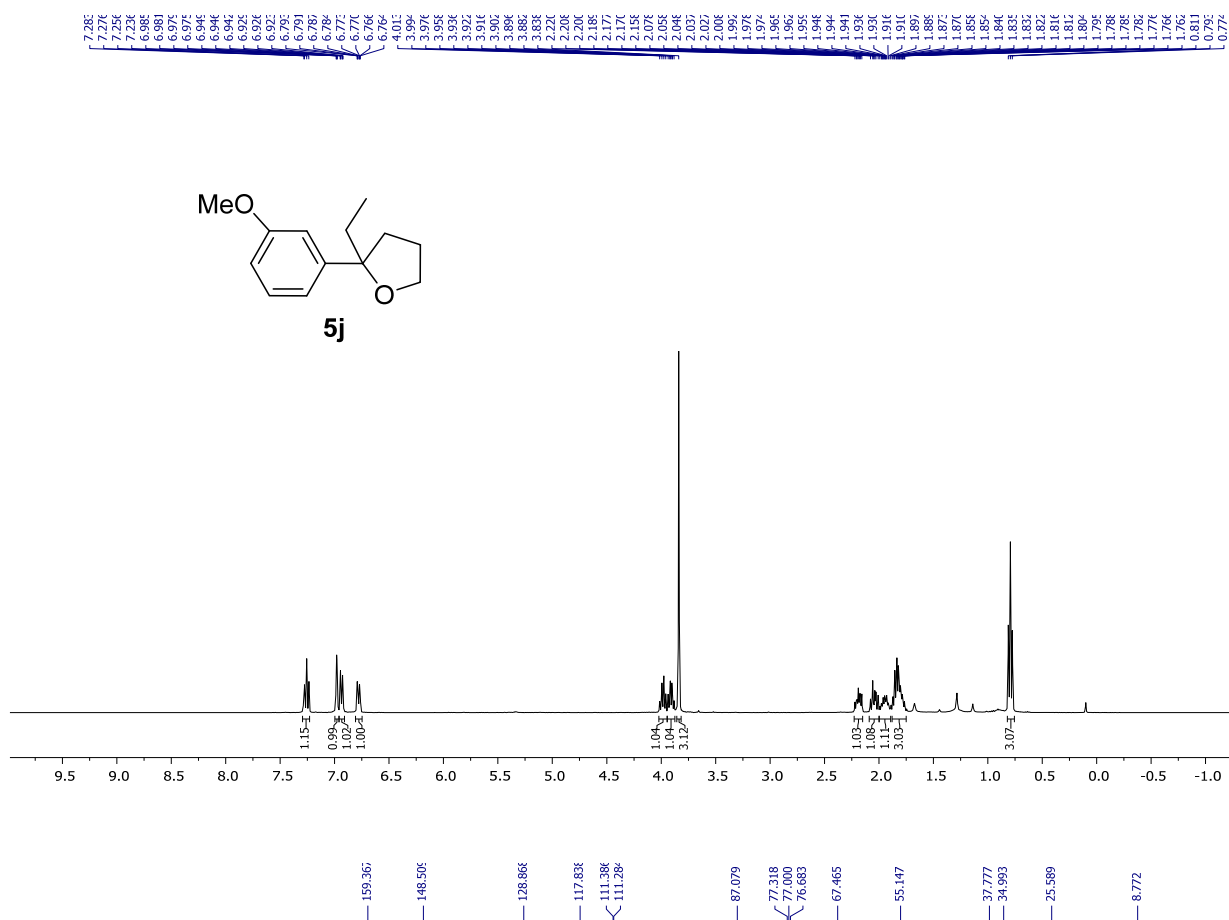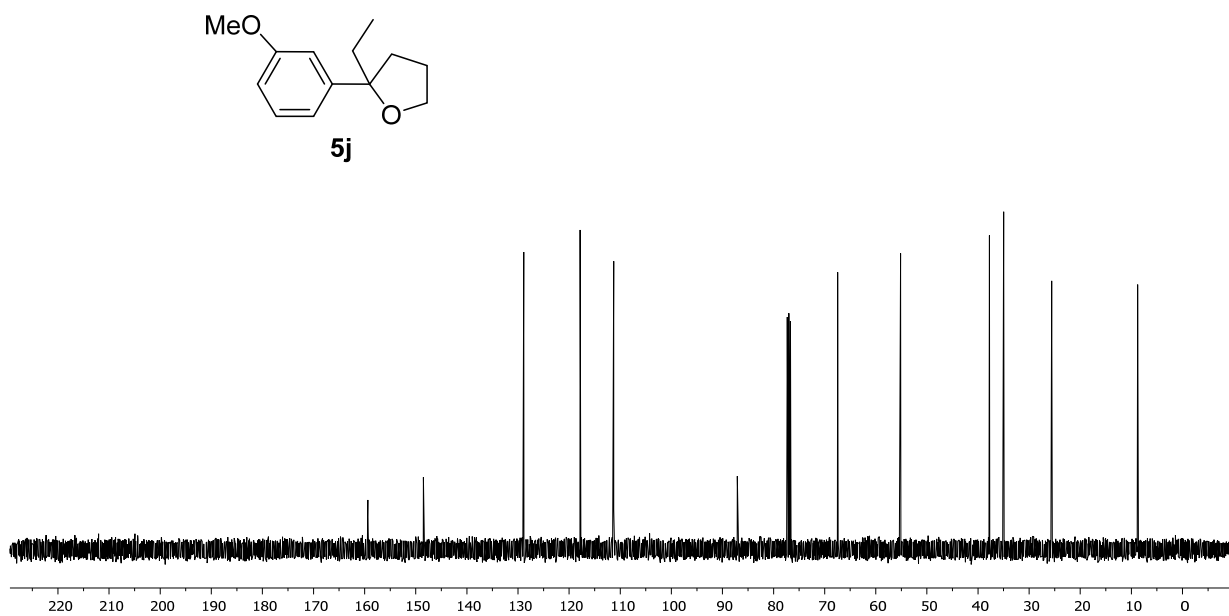

Supplementary Figure 69.  $^1\text{H}$  and  $^{13}\text{C}$  NMR spectra of **5j**

BAOX1123E.1.fid — ChemInfo\_1Hzg CDCl3 /opt/ xbao 38

7.291  
7.287  
7.282  
7.169  
7.151  
7.145  
7.141  
7.137  
7.132  
7.116  
7.111  
7.104  
7.098  
7.093  
5.914  
3.883  
3.879  
3.876  
3.858  
3.829  
3.815  
3.809  
3.799  
3.790  
3.775  
2.094  
2.070  
2.063  
2.053  
2.050  
2.040  
2.030  
2.020  
1.994  
1.975  
1.964  
1.955  
1.944  
1.925  
1.915  
1.892  
1.887  
1.879  
1.875  
1.868  
1.858  
1.855  
1.844  
1.843  
1.838  
1.830  
1.824  
1.810  
1.804  
1.751  
1.751  
1.739  
1.732  
1.724  
1.720  
1.714  
1.707  
1.704  
1.691  
1.688  
1.688  
1.678  
1.674  
1.668  
1.658  
1.654  
0.689  
0.681  
0.662

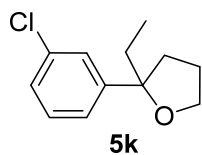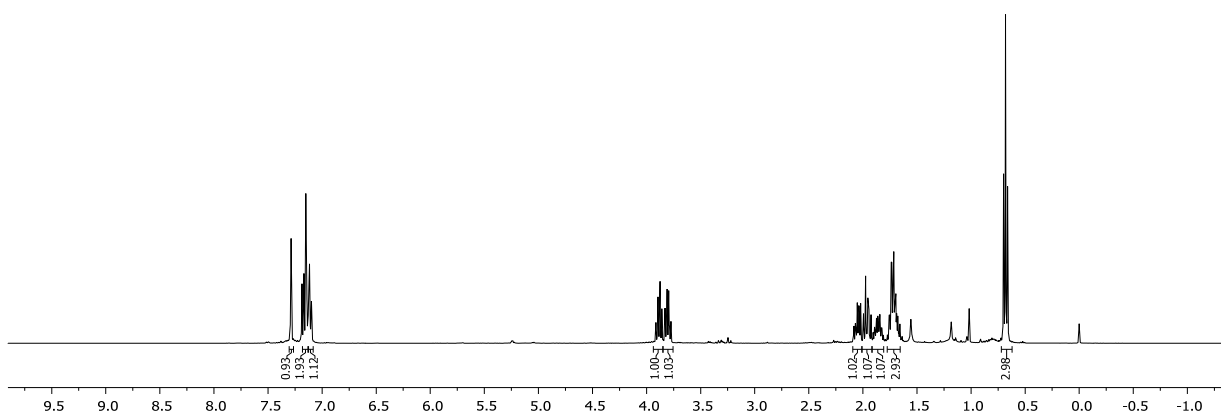

BAOX1123E.2.fid — ChemInfo\_13C\_cpd CDCl3 /opt/ xbao 38

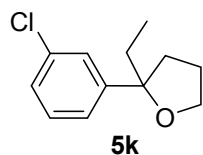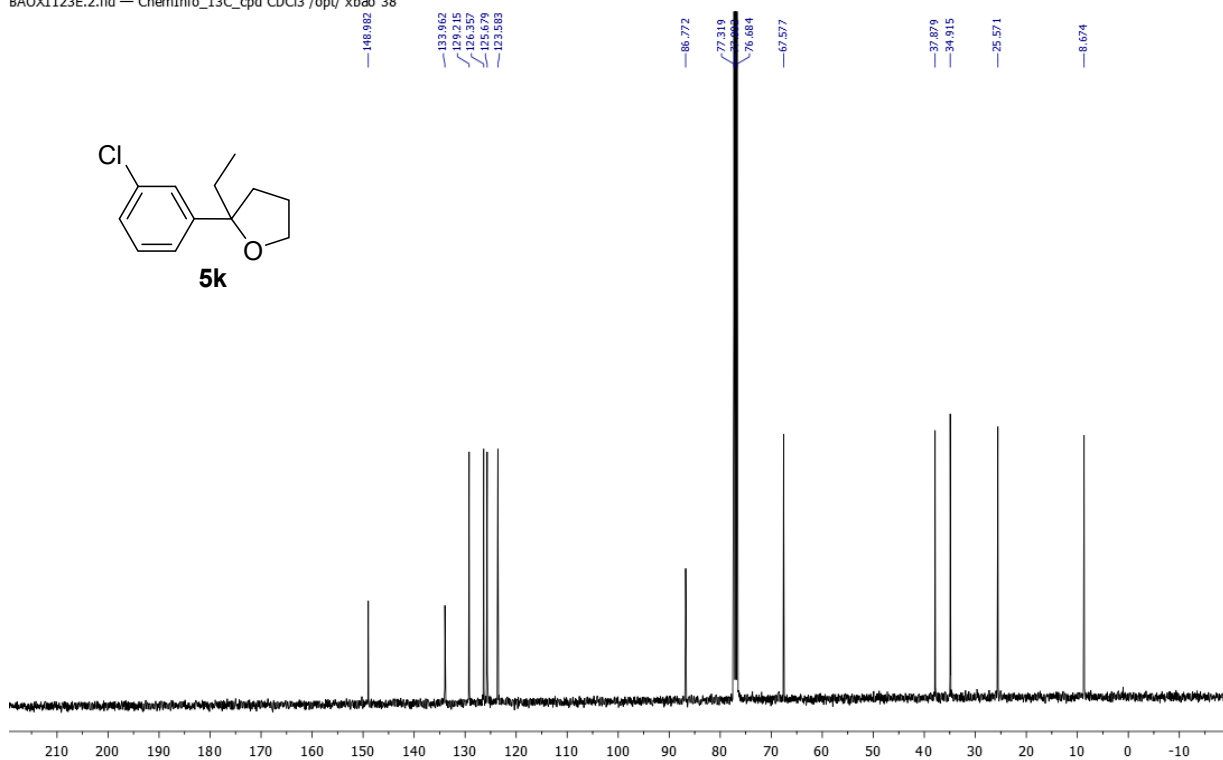

Supplementary Figure 70. <sup>1</sup>H and <sup>13</sup>C NMR spectra of 5k

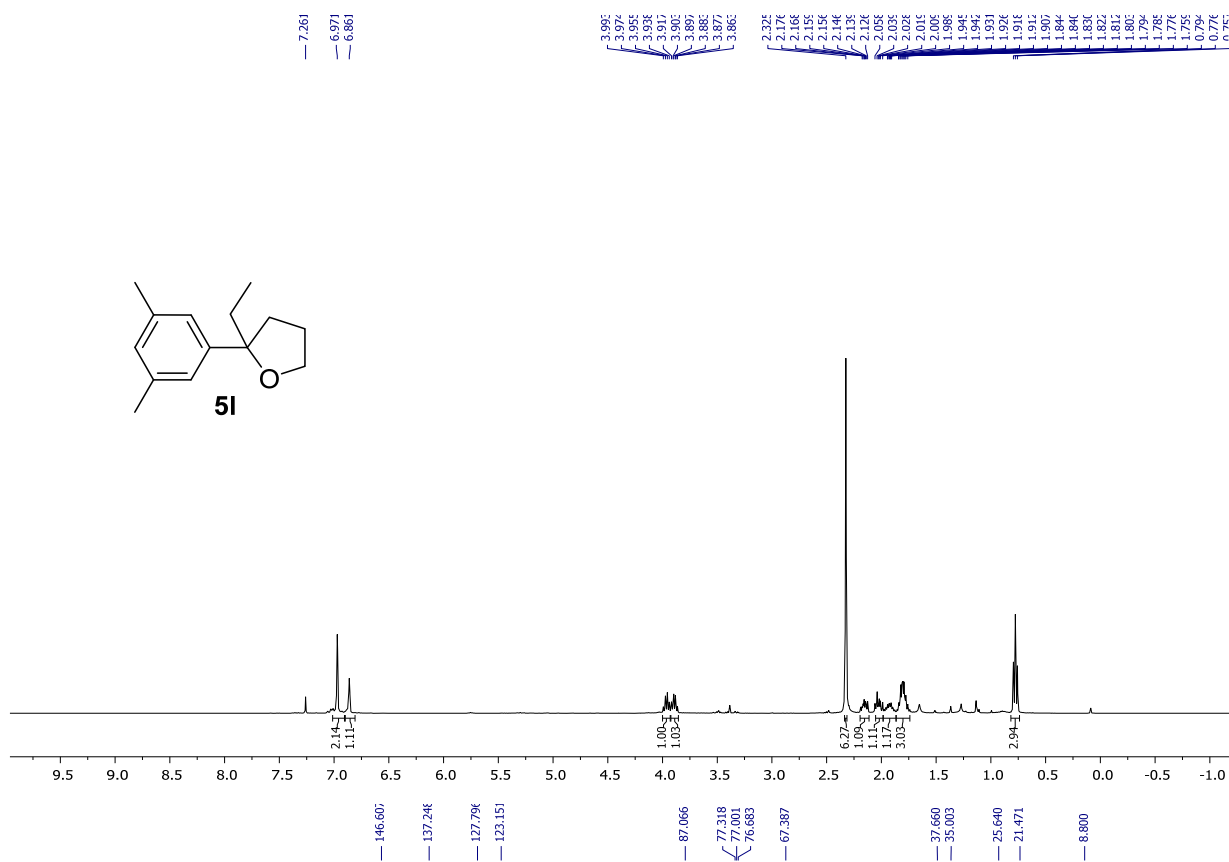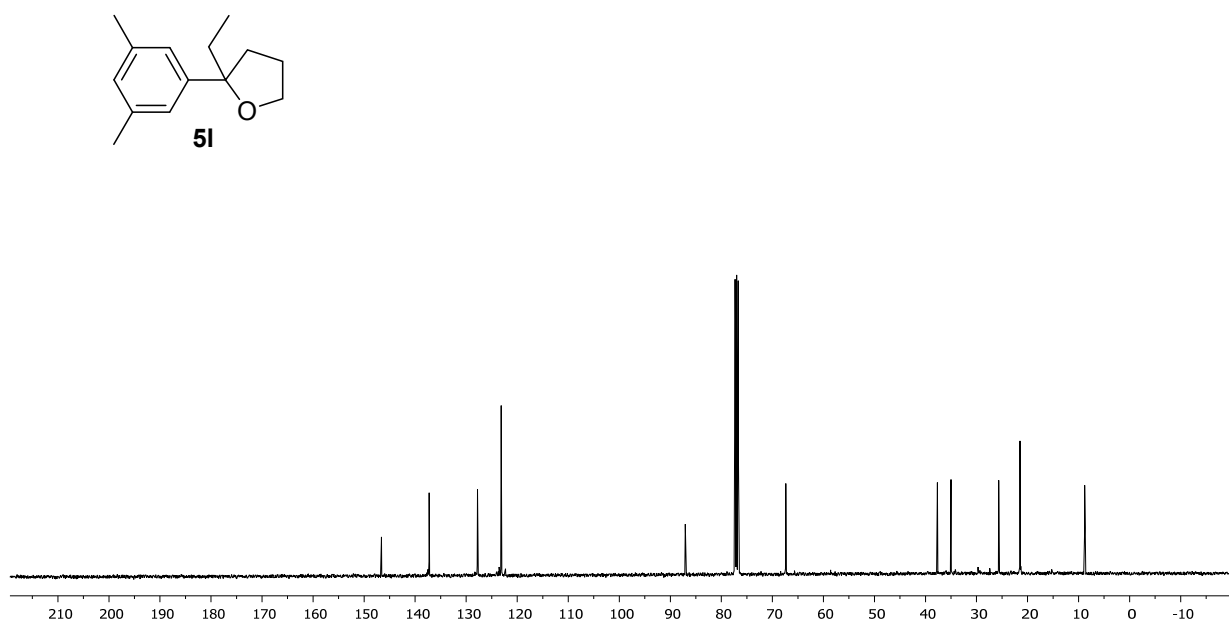

Supplementary Figure 71.  $^1\text{H}$  and  $^{13}\text{C}$  NMR spectra of **51**



BAOX1361B.1.fid —

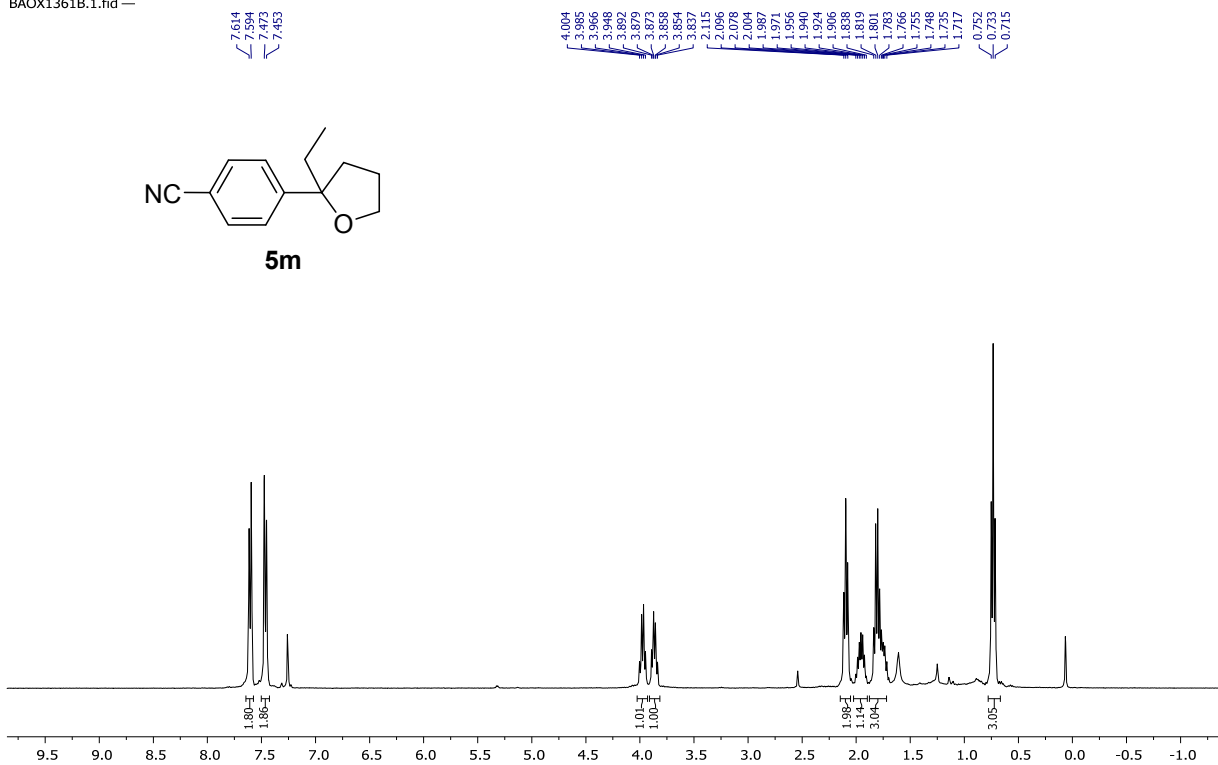

BAOX1361B.2.fid —

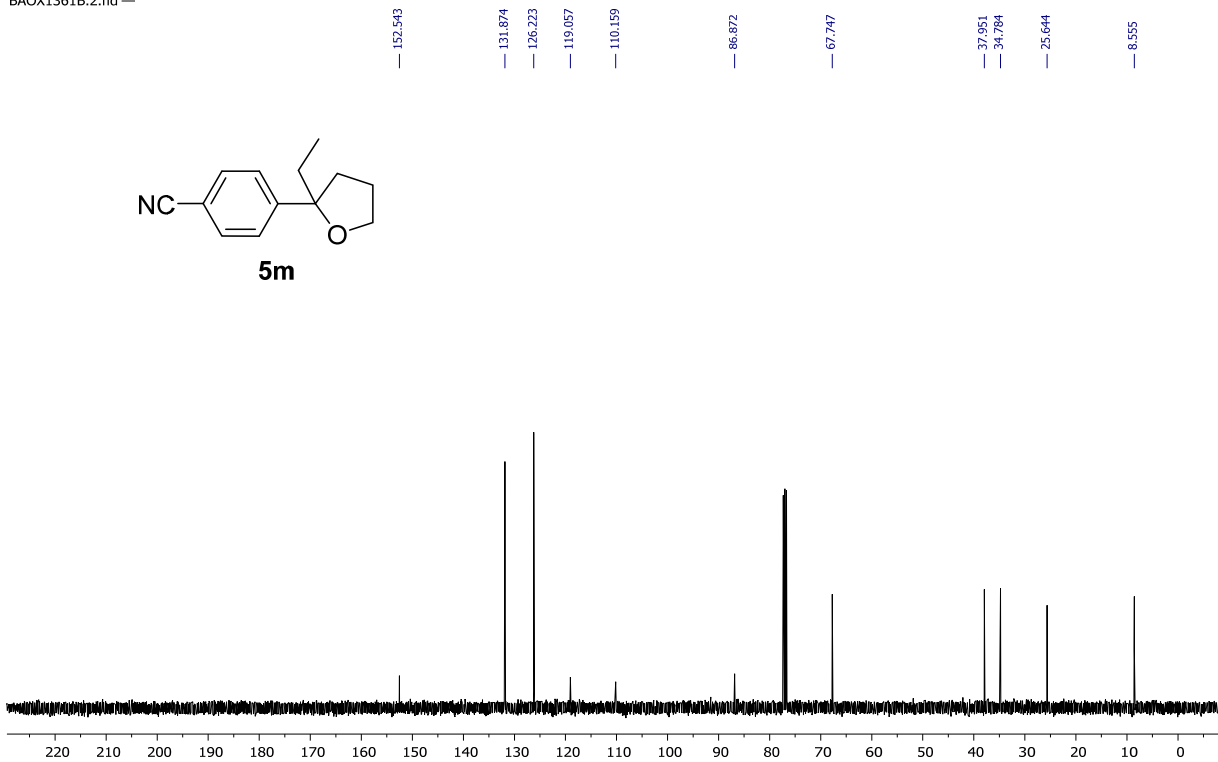

Supplementary Figure 72. <sup>1</sup>H and <sup>13</sup>C NMR spectra of 5m

BAOX1145B.1.fid —

7.393  
7.383  
7.380  
7.297  
7.285  
7.277  
7.273  
7.264  
7.256  
7.251  
7.243  
7.237  
3.7746  
3.7737  
3.7728  
3.7719  
3.7713  
3.713  
3.708  
3.559  
3.552  
3.528  
3.528  
3.516  
3.503  
3.495  
2.348  
2.340  
2.332  
2.328  
2.316  
2.308  
2.304  
2.297  
2.291  
1.803  
1.789  
1.784  
1.784  
1.751  
1.742  
1.732  
1.719  
1.711  
1.698  
1.682  
1.686  
1.678  
1.674  
1.659  
1.655  
1.646  
1.646  
1.636  
1.635  
1.628  
1.622  
1.618  
1.607  
1.548  
1.525  
1.520  
1.515  
1.510  
1.505  
1.500  
1.483  
1.464  
1.464  
1.459  
1.456  
1.452  
1.445  
1.438  
1.432  
1.425  
1.419  
1.414  
0.7709  
0.691  
0.672

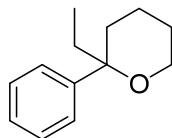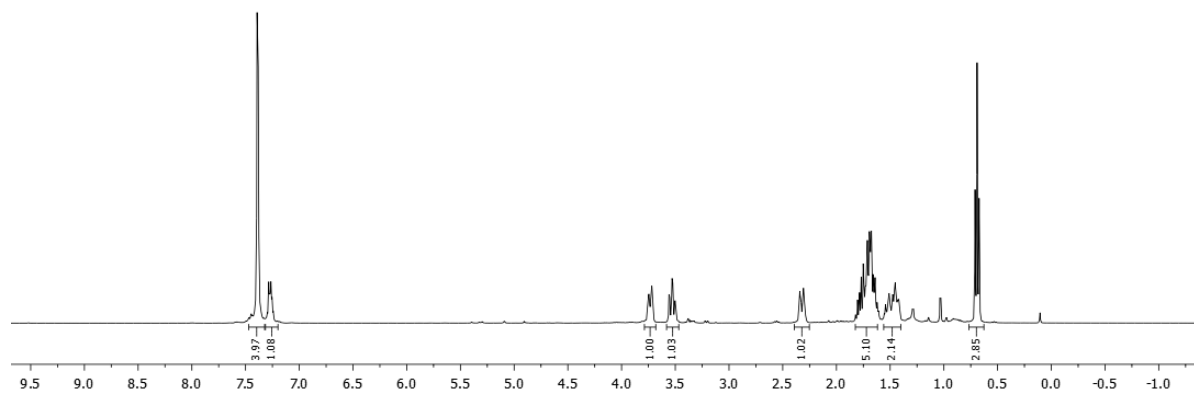

BAOX1145B.3.fid —

143.217  
128.128  
126.929  
126.336  
78.693  
77.348  
77.031  
76.714  
62.591  
37.434  
32.527  
26.249  
19.895  
7.680

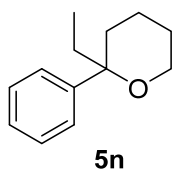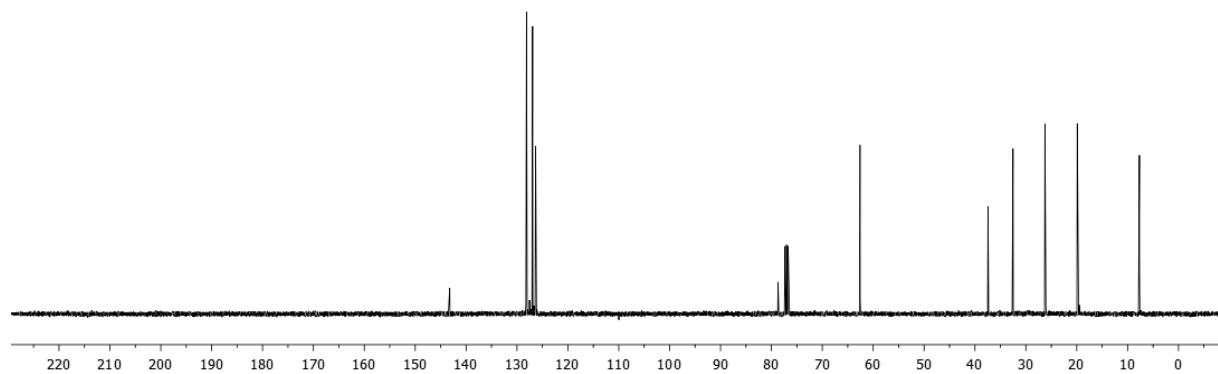

Supplementary Figure 73.  $^1\text{H}$  and  $^{13}\text{C}$  NMR spectra of 5n

BAOX1138D.1.fid —

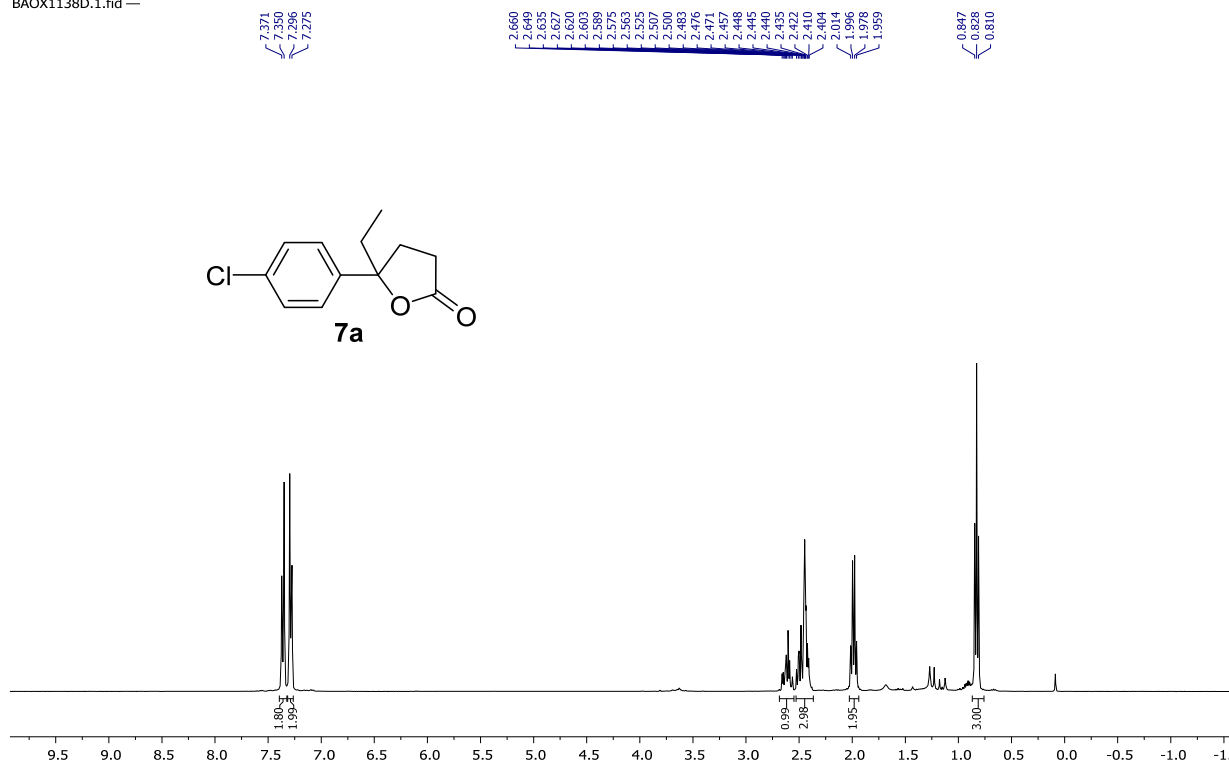

BAOX1138D.3.fid —

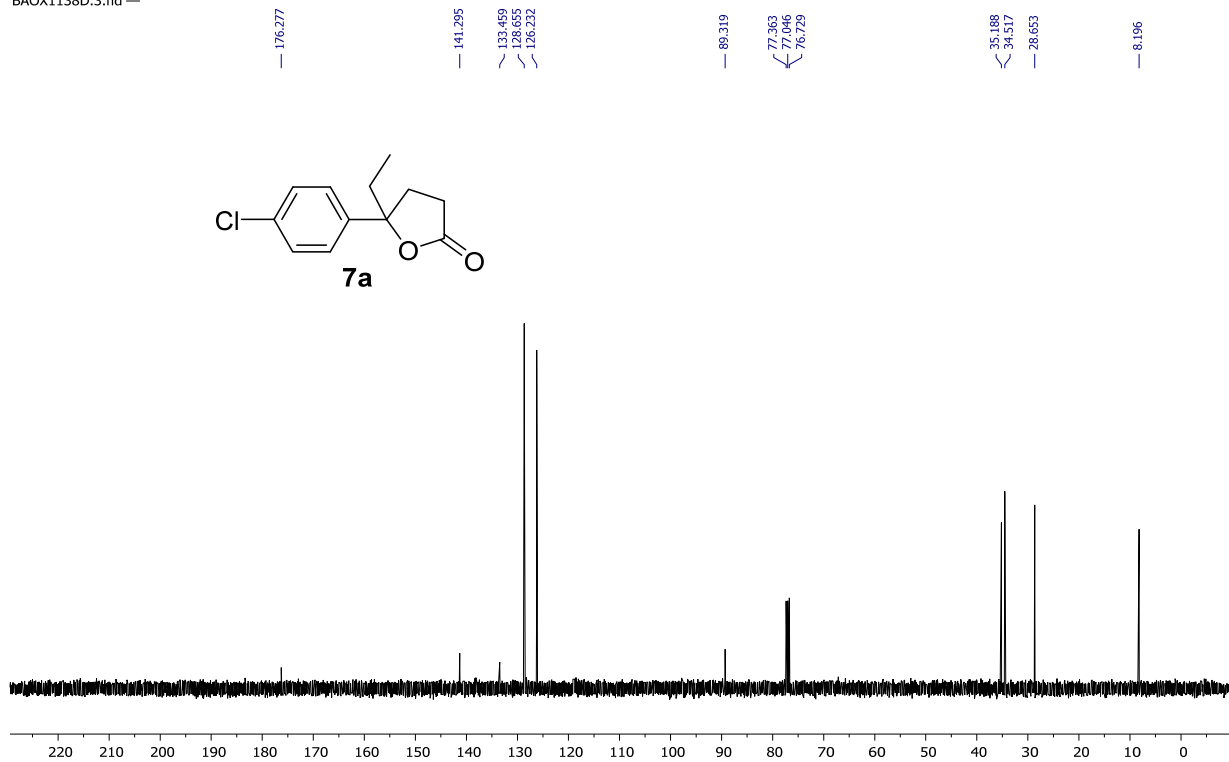

Supplementary Figure 74. <sup>1</sup>H and <sup>13</sup>C NMR spectra of **7a**

BAOX1142E.1.fid —

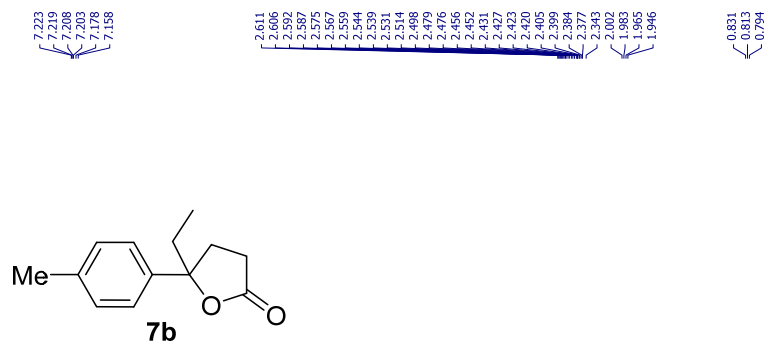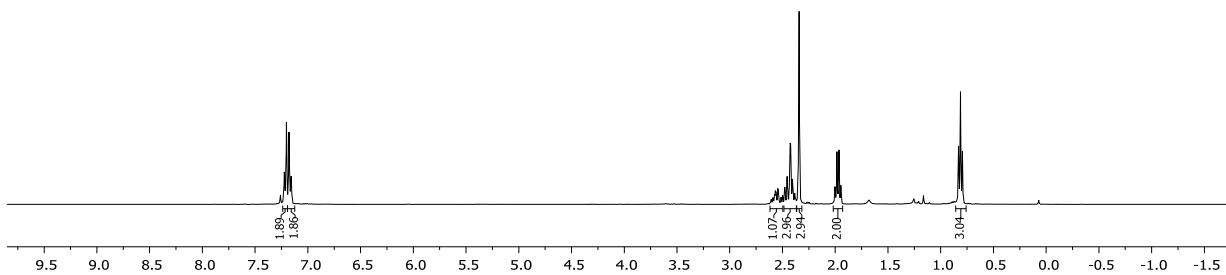

BAOX1142E.2.fid —

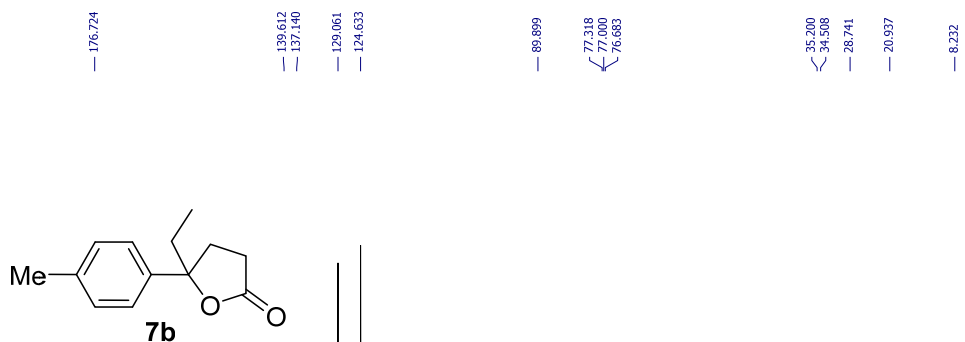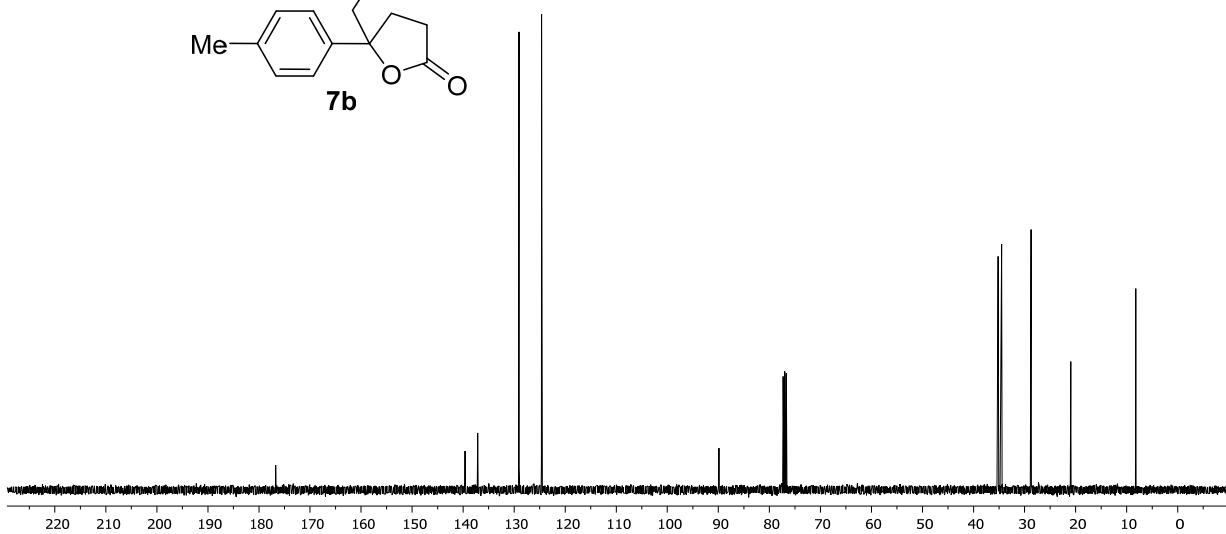

Supplementary Figure 75. <sup>1</sup>H and <sup>13</sup>C NMR spectra of **7b**

BAOX1142F.1.fid —

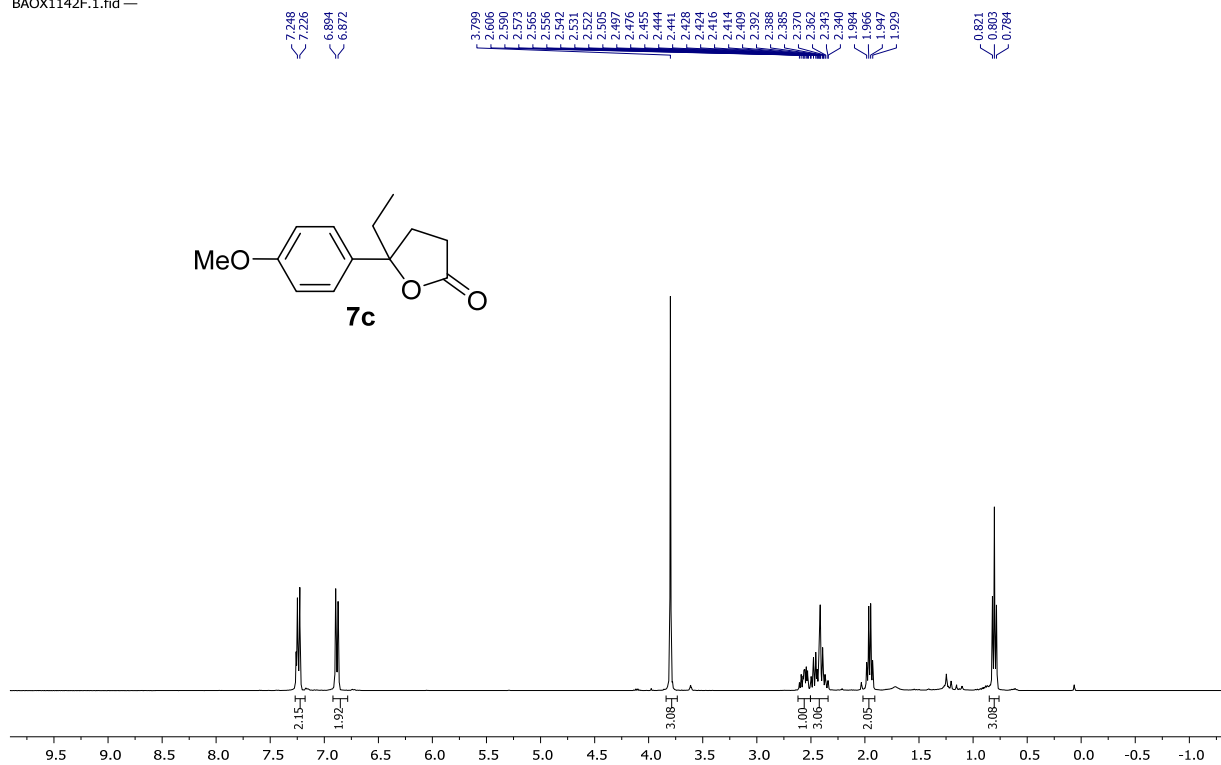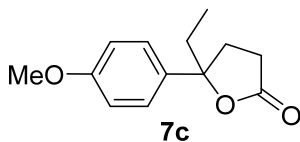

BAOX1142F.2.fid —

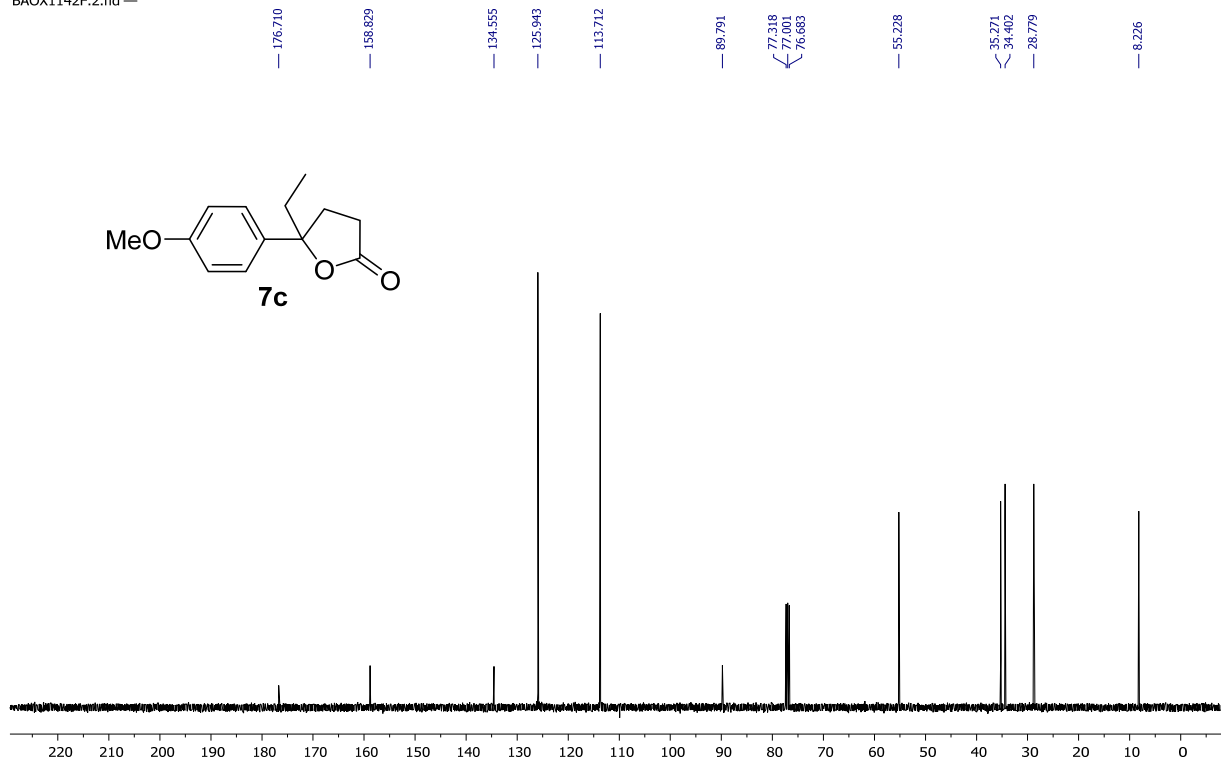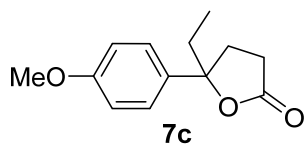

Supplementary Figure 76. <sup>1</sup>H and <sup>13</sup>C NMR spectra of **7c**

BAOX1142B.2.fid —

7.322  
7.314  
7.309  
7.301  
7.297  
7.292  
7.284  
7.271  
7.261  
7.076  
7.068  
7.062  
7.054  
7.051  
7.044  
7.041  
7.038  
7.030  
7.024

2.634  
2.621  
2.607  
2.601  
2.594  
2.590  
2.586  
2.580  
2.570  
2.560  
2.541  
2.503  
2.486  
2.478  
2.461  
2.453  
2.444  
2.434  
2.431  
2.429  
2.420  
2.408  
2.403  
2.395  
2.386  
1.986  
1.973  
1.970  
1.955  
1.952  
1.936  
1.934  
0.830  
0.802  
0.783

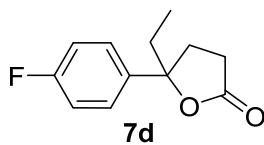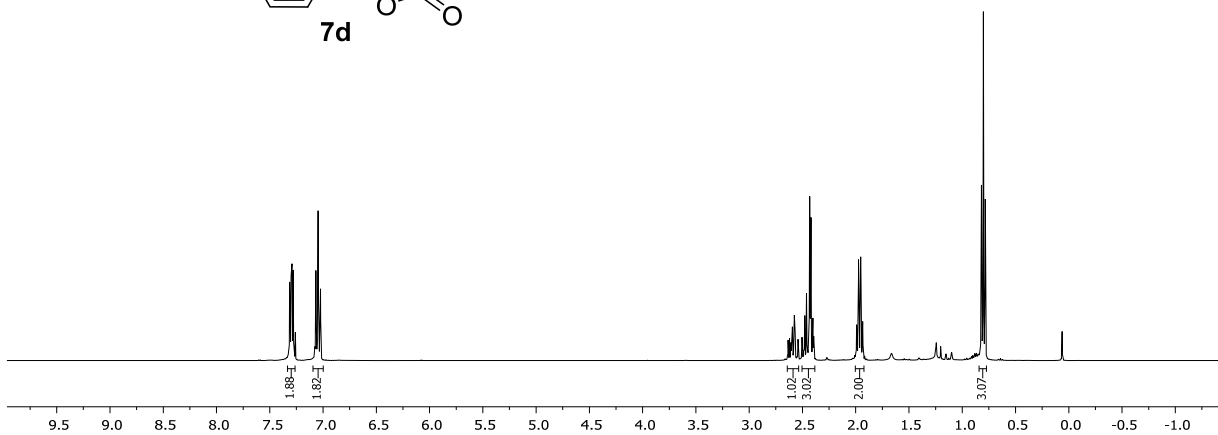

BAOX1142B.1.fid —

176.348  
163.232  
160.782  
138.466  
138.454  
126.521  
126.441  
115.403  
115.191  
89.405  
77.318  
77.000  
76.683  
35.284  
34.492  
28.664  
8.161

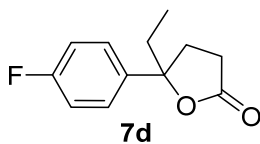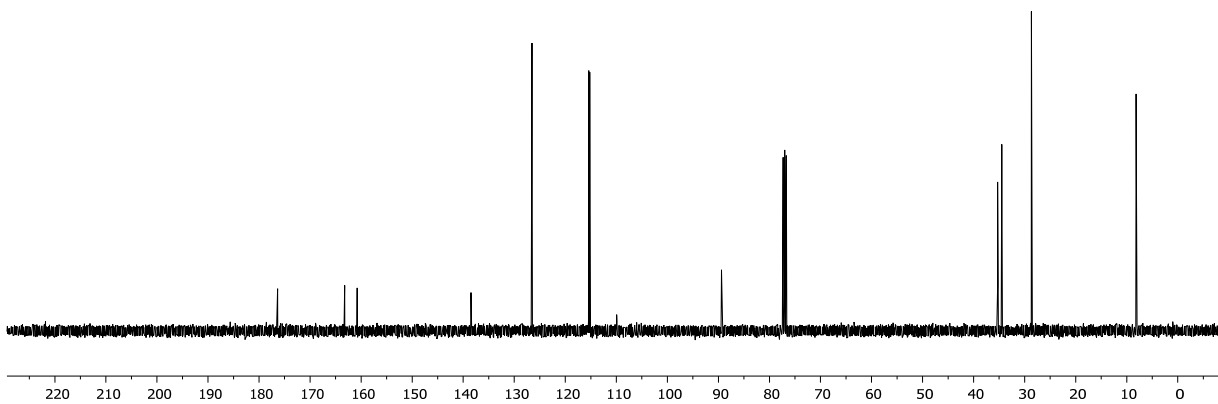

Supplementary Figure 77. <sup>1</sup>H and <sup>13</sup>C NMR spectra of 7d

BAOX1142A.1.fid —

7.319  
7.316  
7.312  
7.302  
7.298  
7.295  
7.286  
7.281  
7.279  
7.275  
7.265  
7.258  
7.252  
7.248  
7.244  
7.239  
7.236  
7.234  
7.230  
7.224  
7.221  
7.218  
7.211  
7.205  
7.201  
7.195  
7.189  
2.555  
2.548  
2.542  
2.529  
2.522  
2.520  
2.516  
2.514  
2.511  
2.499  
2.493  
2.487  
2.476  
2.464  
2.446  
2.441  
2.437  
2.432  
2.420  
2.416  
2.405  
2.403  
2.399  
2.386  
2.382  
2.375  
2.367  
2.363  
2.359  
2.351  
2.347  
2.342  
2.332  
2.330  
1.952  
1.934  
1.915  
1.897  
0.766  
0.767  
0.729

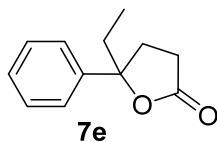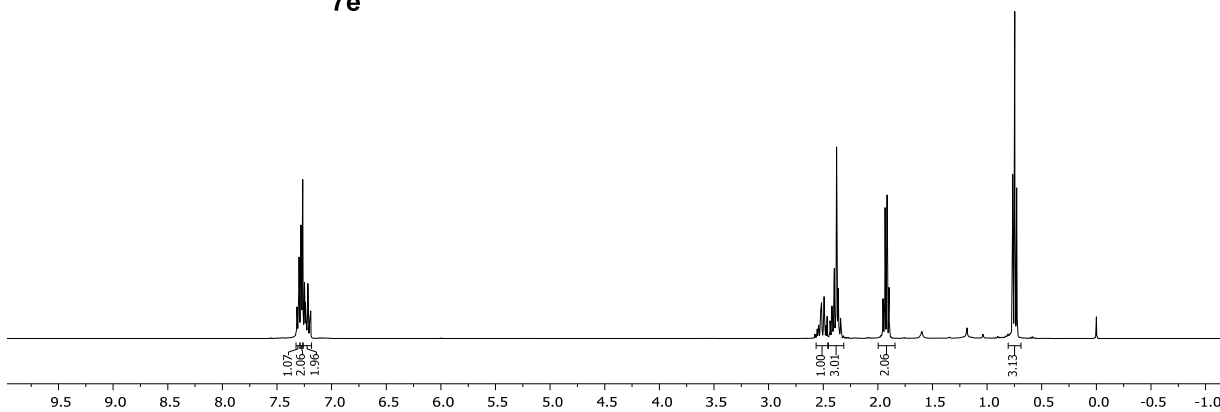

BAOX1142A.2.fid —

176.613  
142.655  
128.410  
127.455  
124.684  
89.810  
77.318  
77.001  
76.683  
35.216  
34.526  
28.702  
8.218

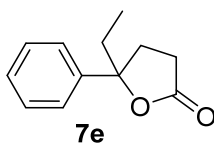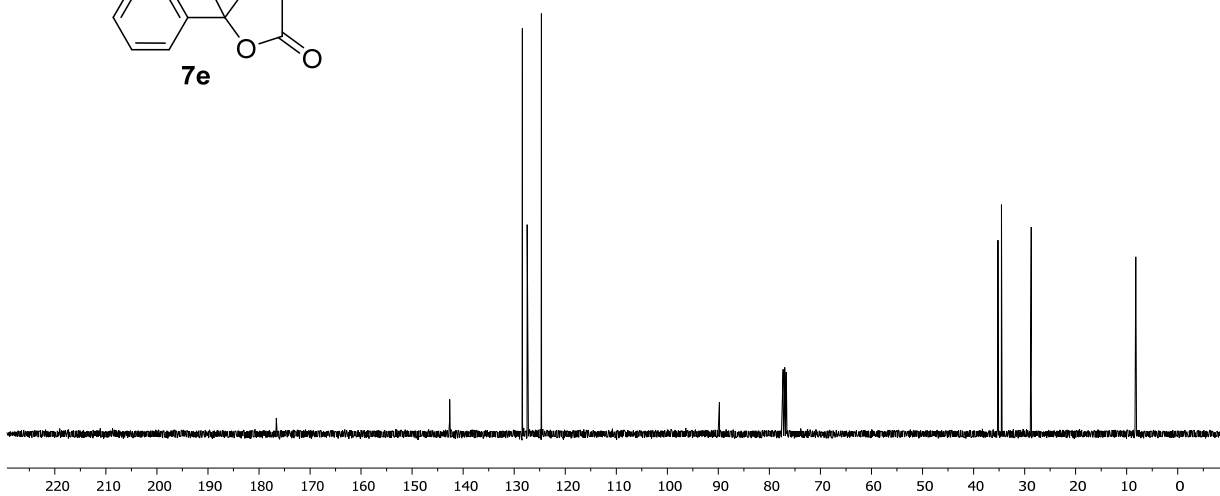

Supplementary Figure 78. <sup>1</sup>H and <sup>13</sup>C NMR spectra of **7e**

BAOX1142C.1.fid

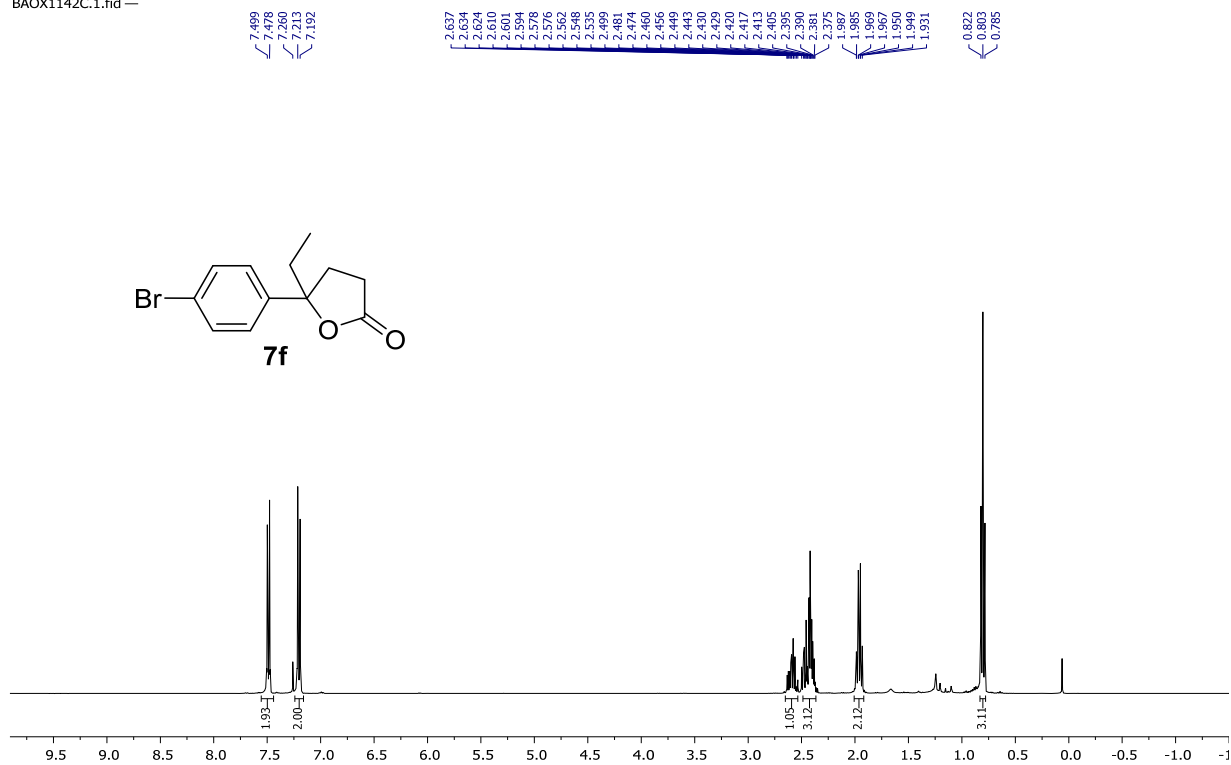

BAOX1142C.2.fid

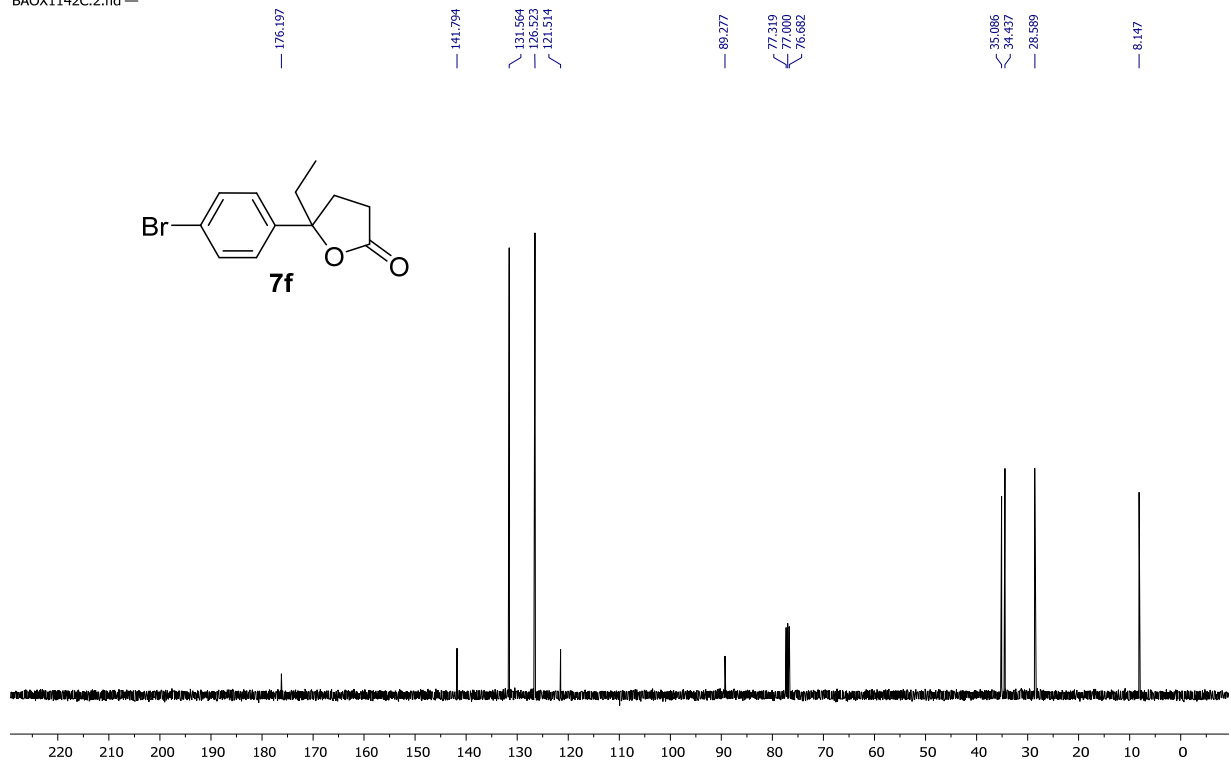

Supplementary Figure 79.  $^1\text{H}$  and  $^{13}\text{C}$  NMR spectra of **7f**



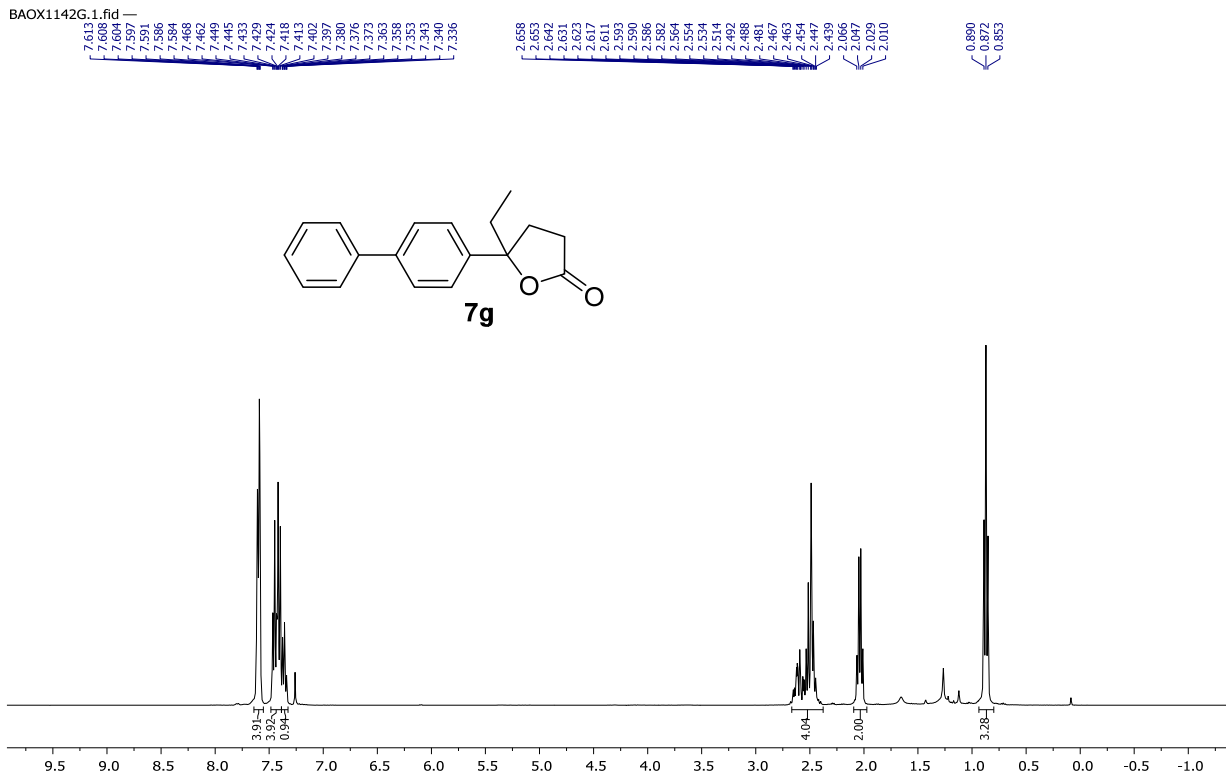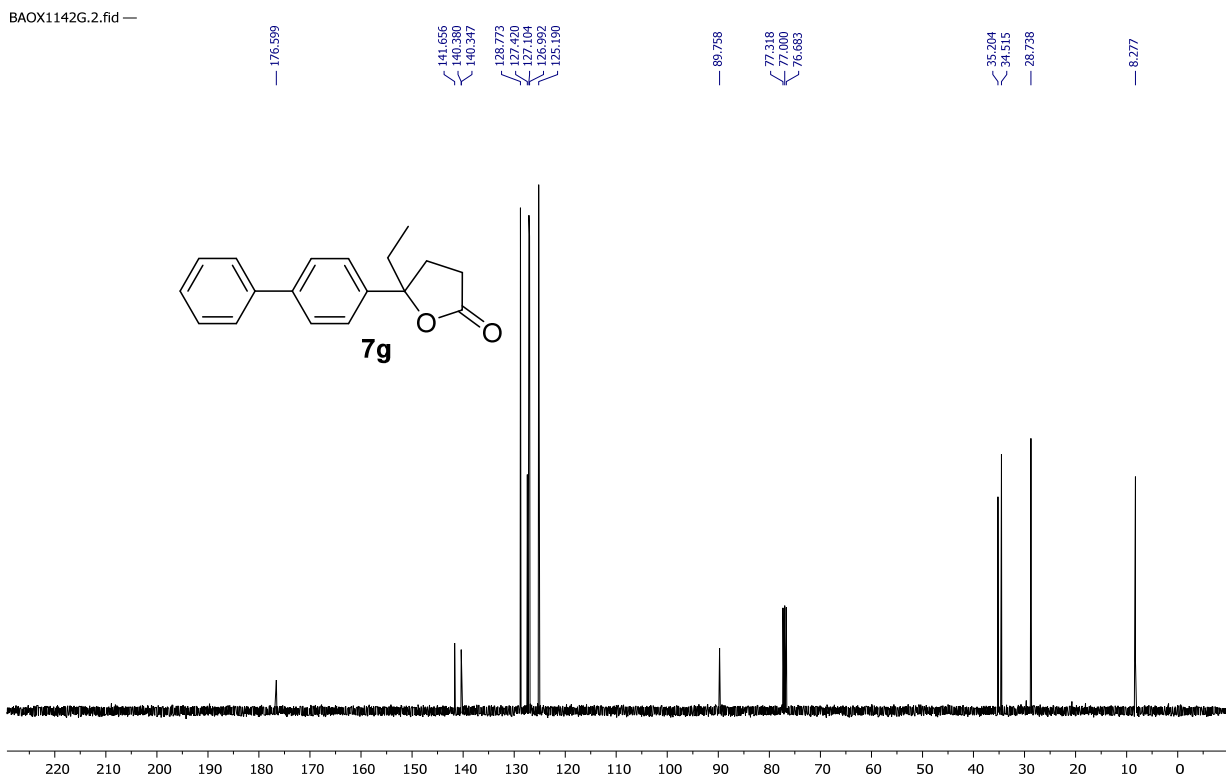

Supplementary Figure 80. <sup>1</sup>H and <sup>13</sup>C NMR spectra of **7g**

BAOX1142D.1.fid —

7.191  
7.184  
7.178  
7.169  
7.162  
7.144  
7.135  
7.129  
2.883  
2.866  
2.849  
2.832  
2.814  
2.797  
2.780  
2.545  
2.538  
2.525  
2.522  
2.517  
2.507  
2.500  
2.492  
2.477  
2.467  
2.439  
2.428  
2.419  
2.405  
2.395  
2.385  
2.388  
2.384  
2.375  
2.370  
2.367  
2.364  
2.347  
2.342  
2.336  
2.332  
2.321  
2.313  
2.292  
1.975  
1.899  
1.880  
1.184  
1.166  
0.771  
0.754

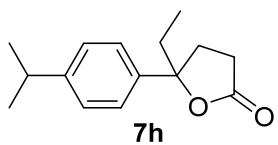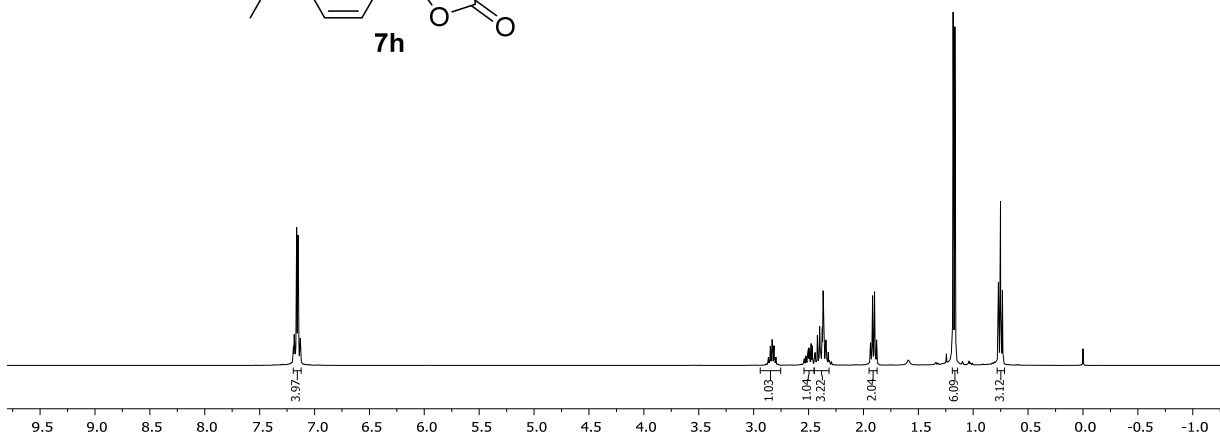

BAOX1142D.2.fid —

176.775  
148.066  
139.959  
126.409  
124.677  
89.934  
77.318  
77.001  
76.683  
35.245  
34.388  
33.634  
28.786  
23.882  
8.266

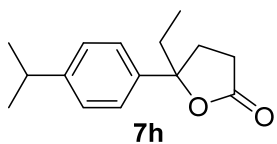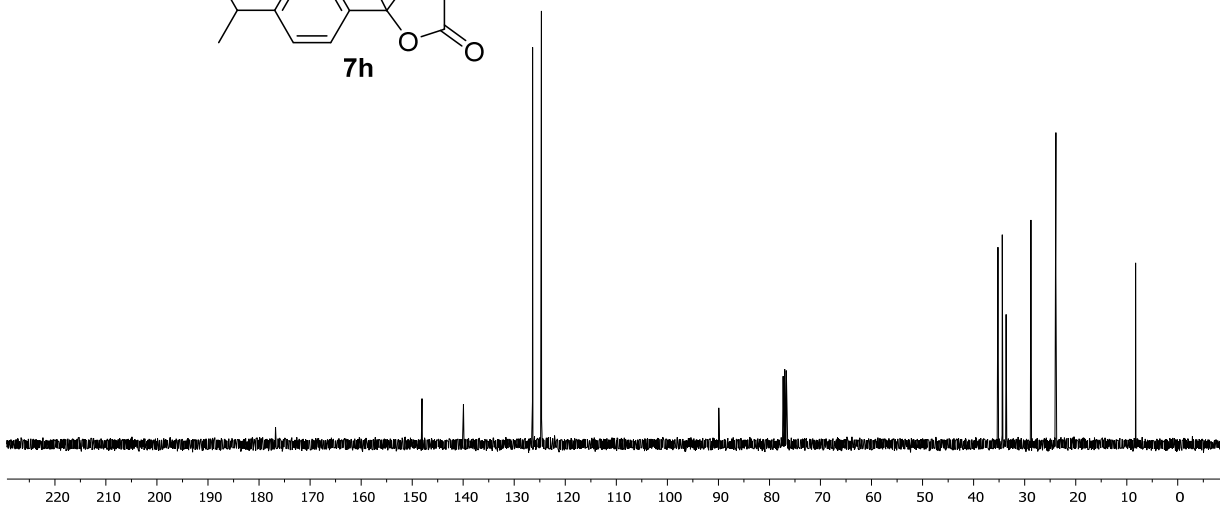

Supplementary Figure 81. <sup>1</sup>H and <sup>13</sup>C NMR spectra of 7h

BAOX1361A.1.fid —

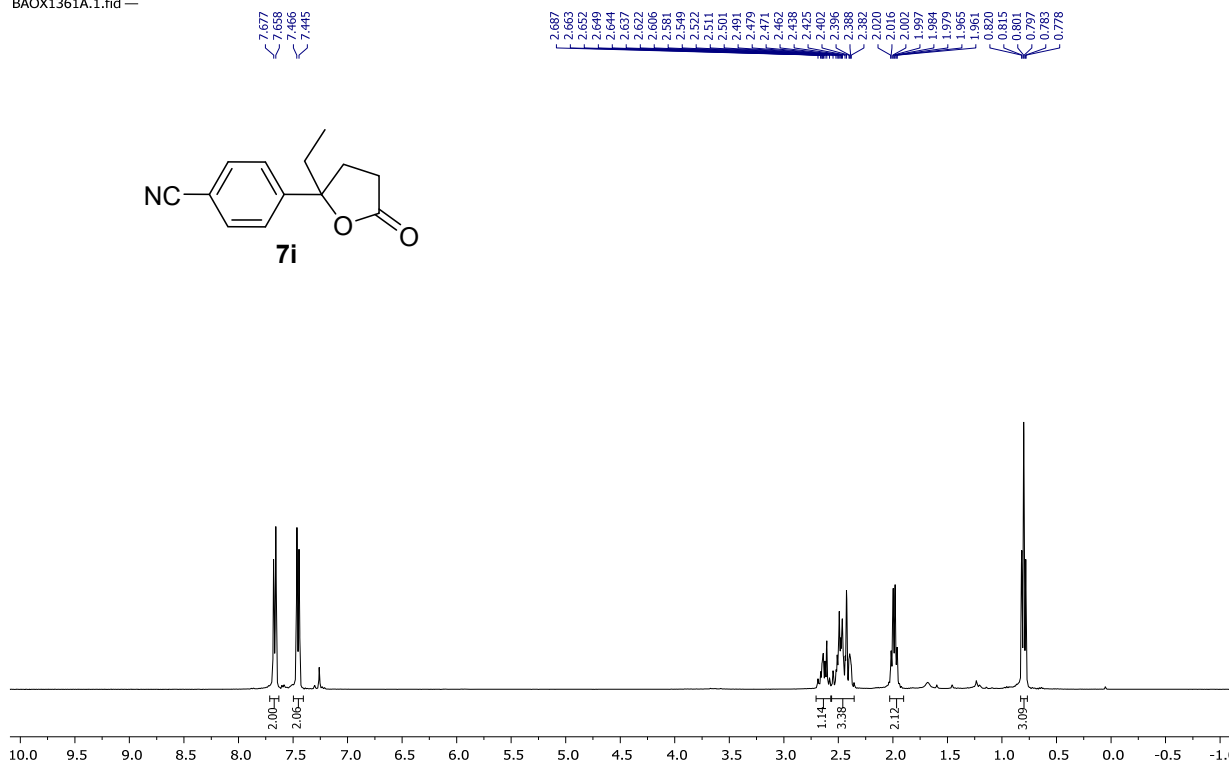

BAOX1361A.2.fid —

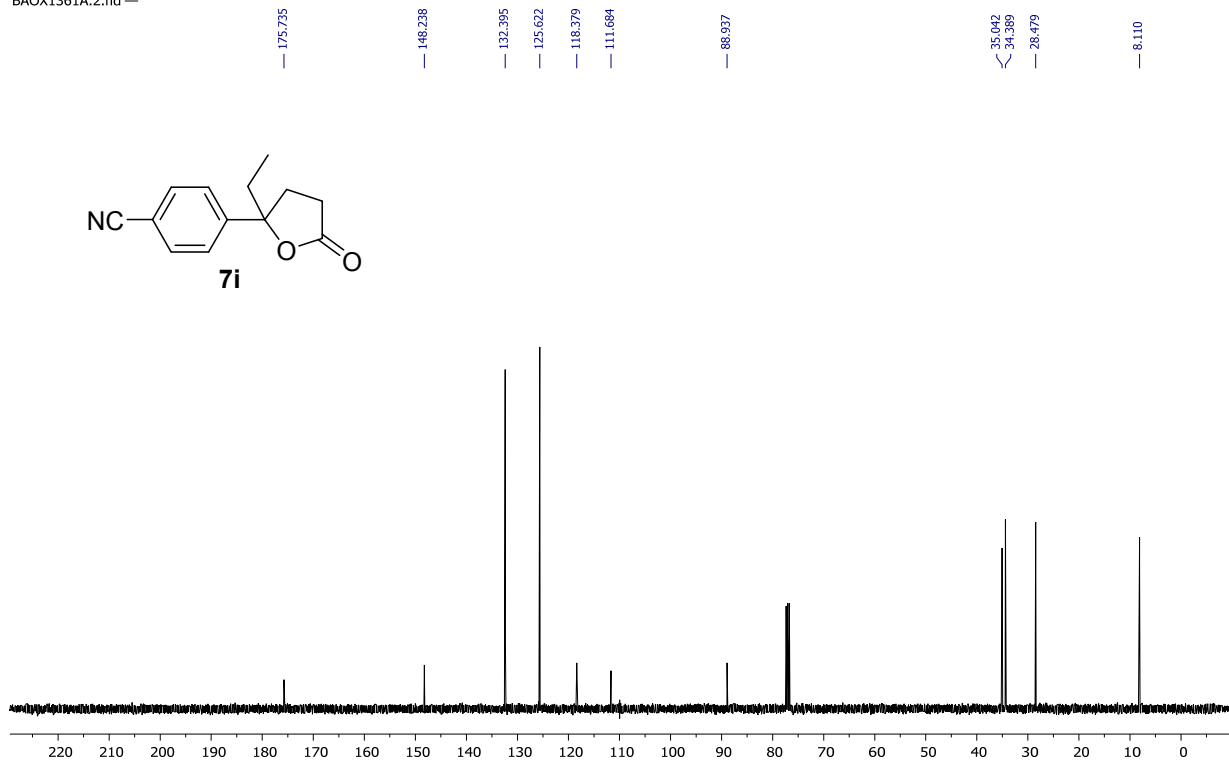

Supplementary Figure 82. <sup>1</sup>H and <sup>13</sup>C NMR spectra of **7i**

BAOX1363C-B.1.fid

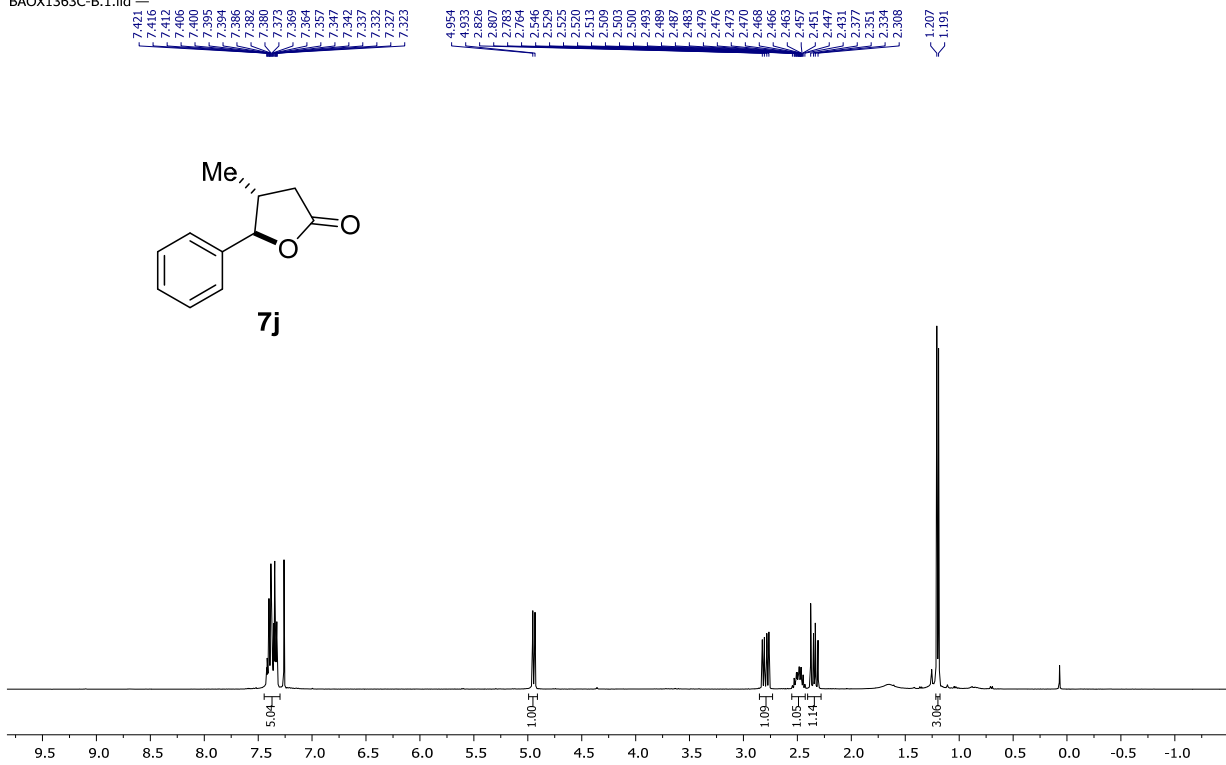

BAOX1363C-B.2.fid

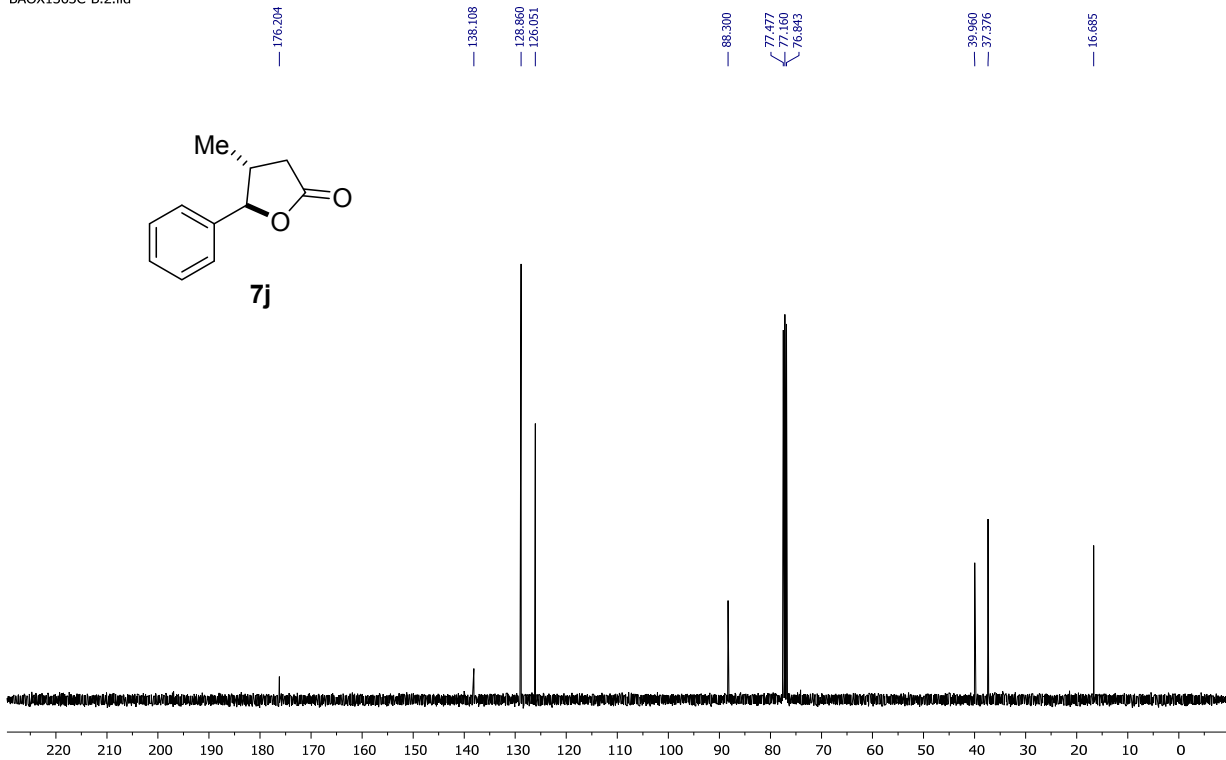

Supplementary Figure 83.  $^1\text{H}$  and  $^{13}\text{C}$  NMR spectra of **7j**

BAOX1124B.1.fid — ChemInfo\_1Hzg CDCl3 /opt/ xbao 22

7.330  
7.327  
7.325  
7.321  
7.318  
7.315  
7.313  
7.309  
7.307  
7.302  
7.228  
7.211  
7.211  
7.208  
7.198  
7.195  
7.126  
7.107

3.687  
3.670  
3.664  
3.654  
3.644  
3.628  
3.595  
3.581  
3.577  
3.572  
3.562  
3.557  
3.550  
3.539

2.572  
2.506  
2.503  
2.487  
2.468  
2.441  
2.423  
2.418  
2.406  
2.386  
2.198  
2.187  
2.179  
2.177  
2.172  
2.168  
2.158  
2.153  
1.939  
1.936  
1.925  
1.925  
1.921  
1.917  
1.910  
1.907  
1.907  
1.894  
1.888  
1.010  
-0.991  
1.000

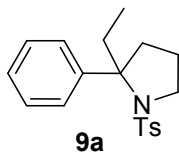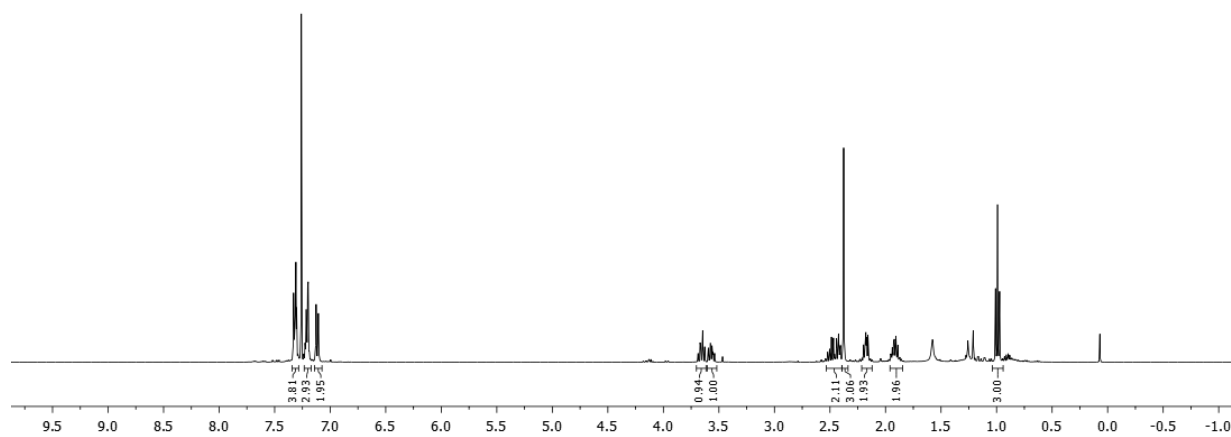

BAOX1124B.2.fid — ChemInfo\_13C\_cpd CDCl3 /opt/ xbao 22

145.178  
142.236  
137.985  
128.961  
127.857  
126.982  
126.771  
126.646

77.319  
77.000  
76.683  
73.160

50.245

40.779

31.156

23.147  
21.420

9.629

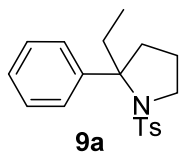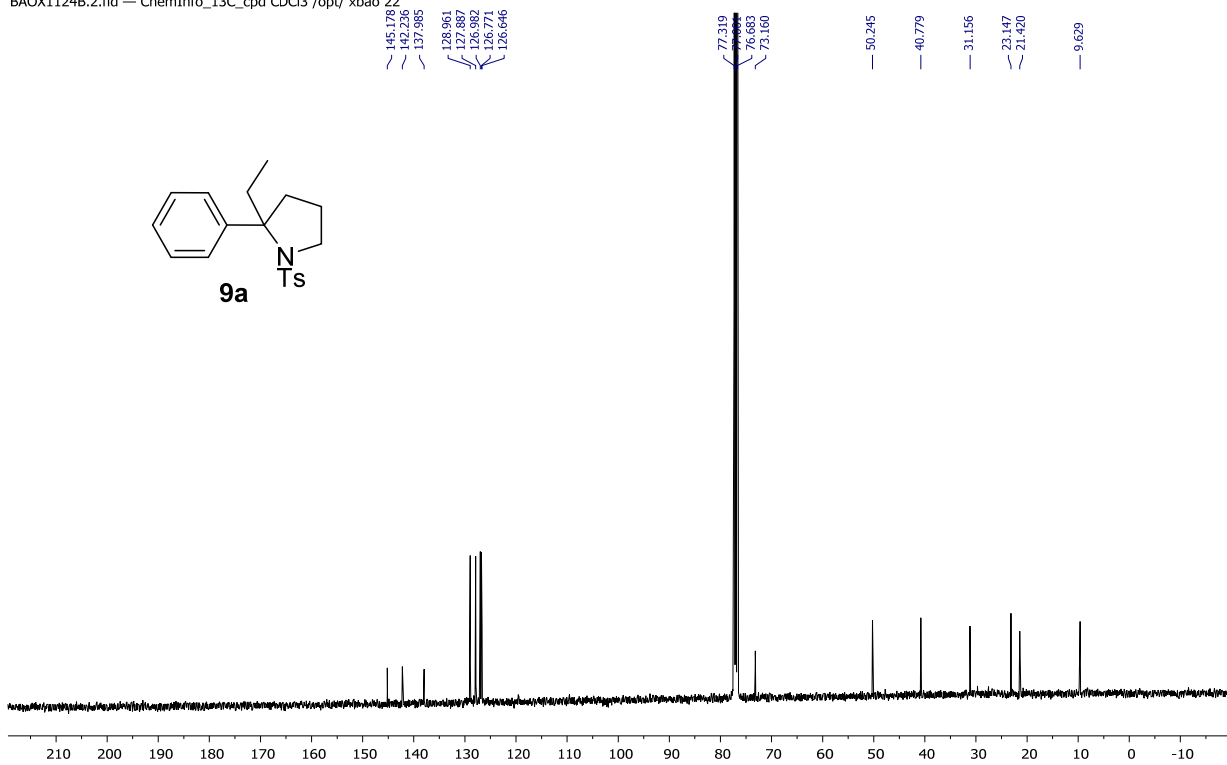

Supplementary Figure 84.  $^1\text{H}$  and  $^{13}\text{C}$  NMR spectra of **9a**

BAOX1136B.1.fid —

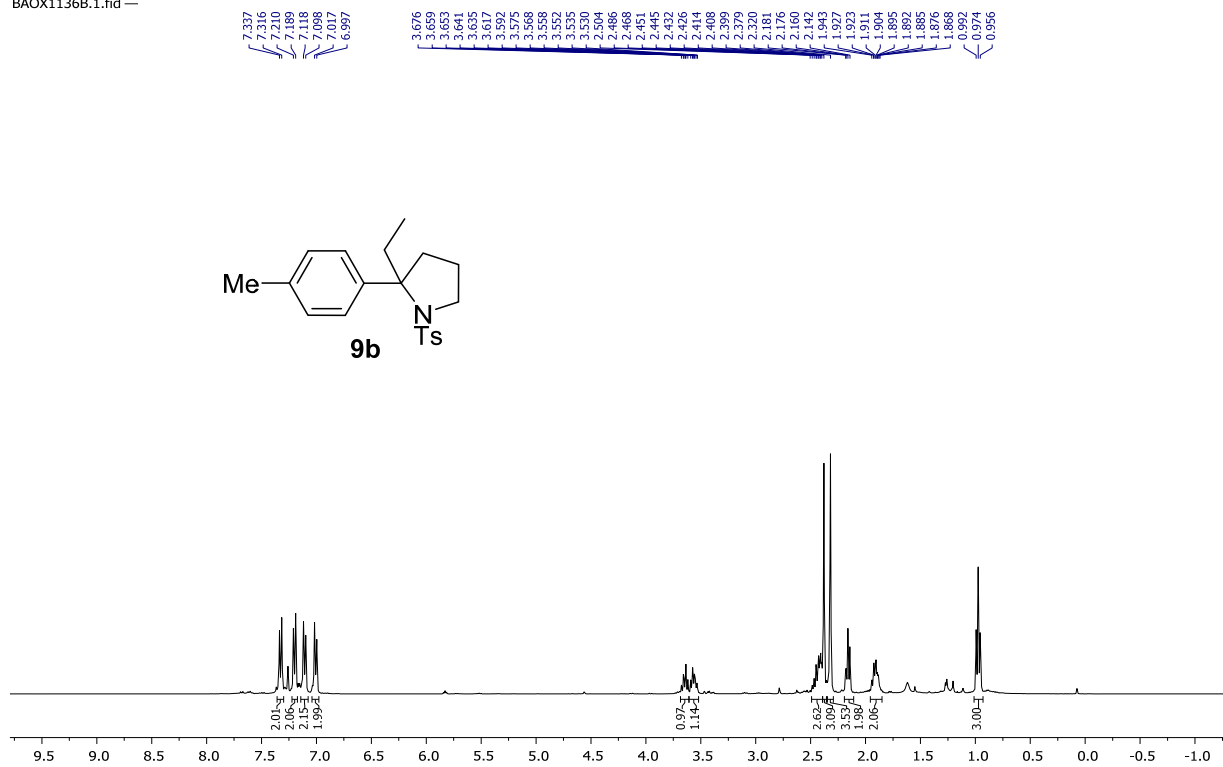

BAOX1136B.2.fid —

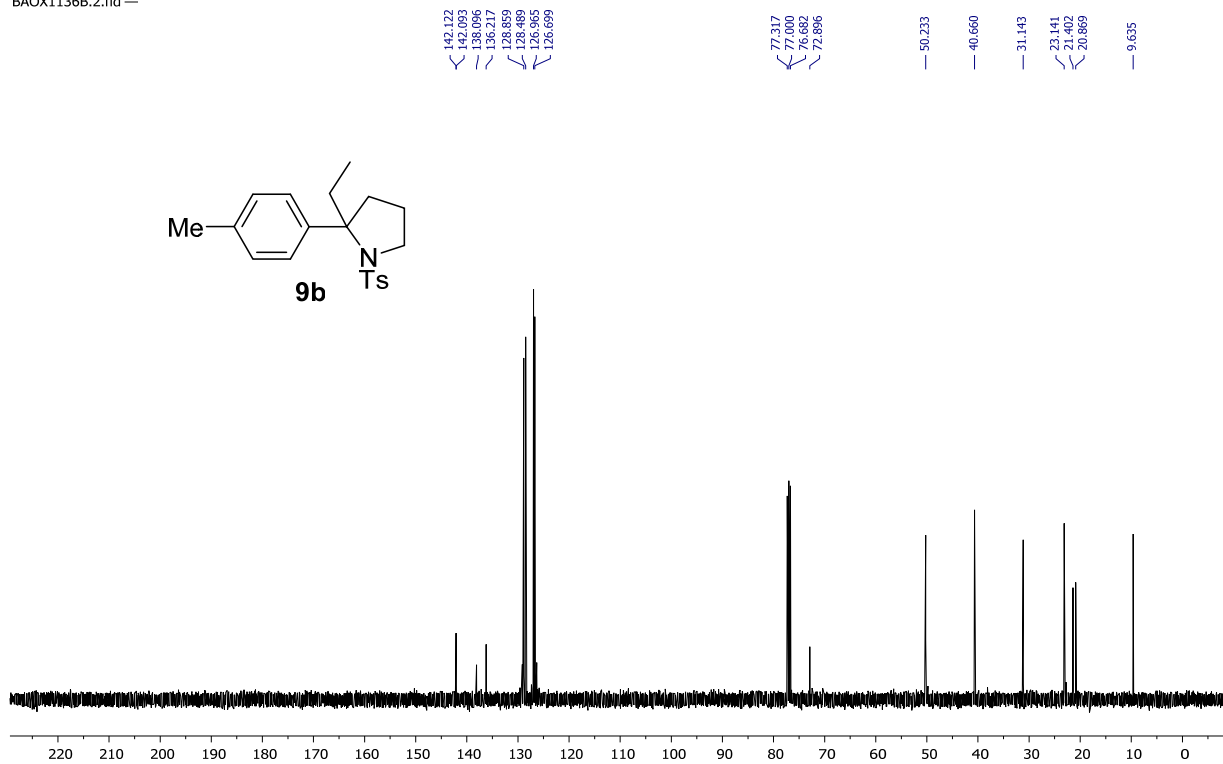

Supplementary Figure 85. <sup>1</sup>H and <sup>13</sup>C NMR spectra of 9b

BAOX1135D.3.fid —

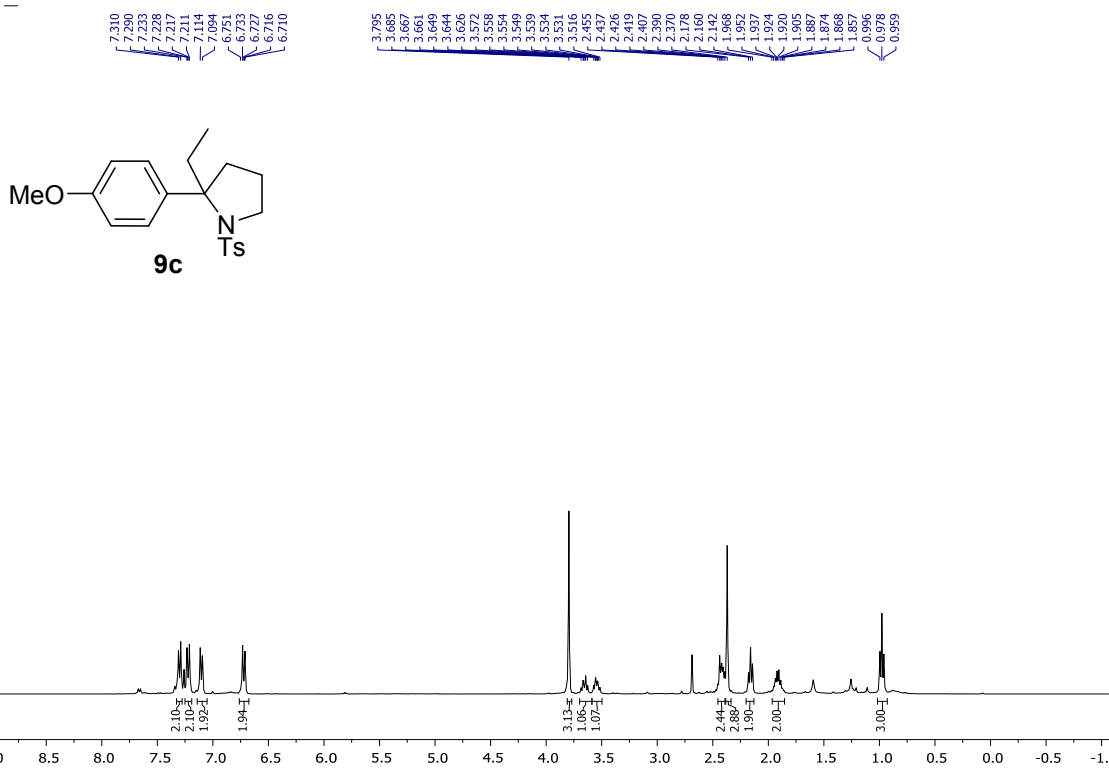

BAOX1135D.4.fid —

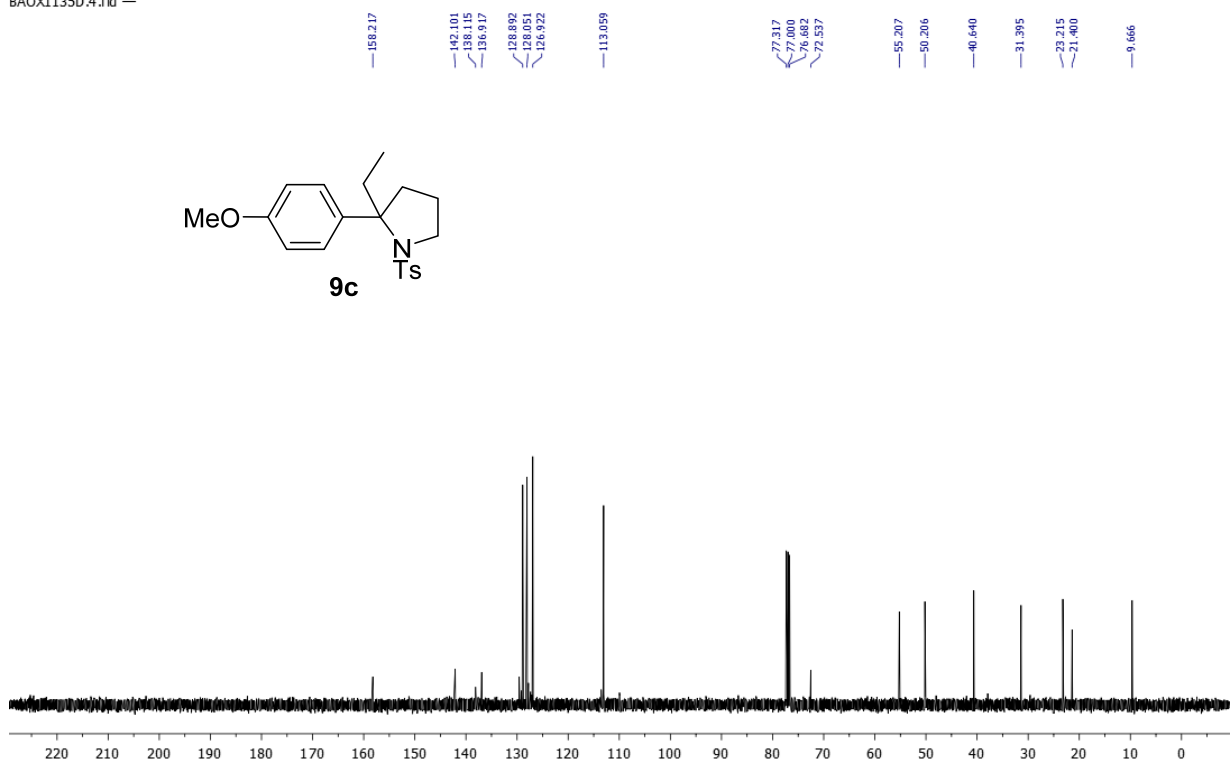

Supplementary Figure 86. <sup>1</sup>H and <sup>13</sup>C NMR spectra of **9c**

BAOX1135B.2.fid —

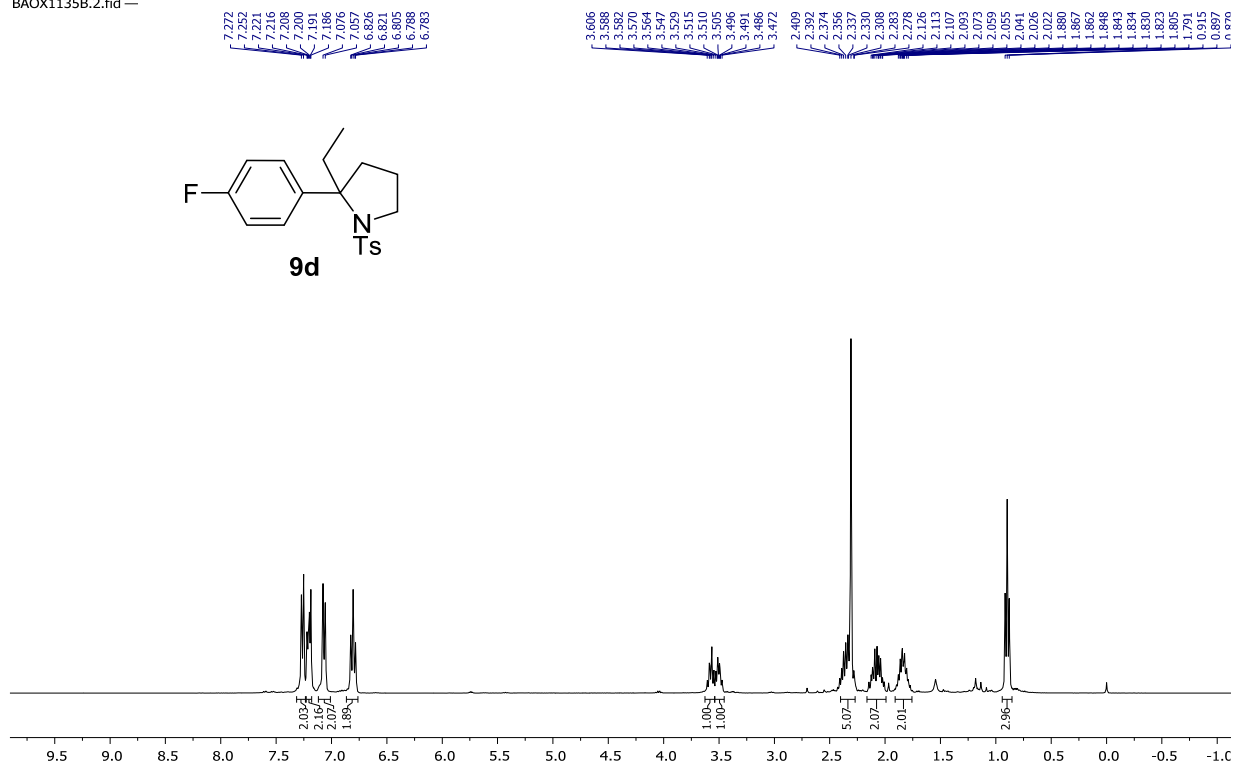

BAOX1135B.3.fid —

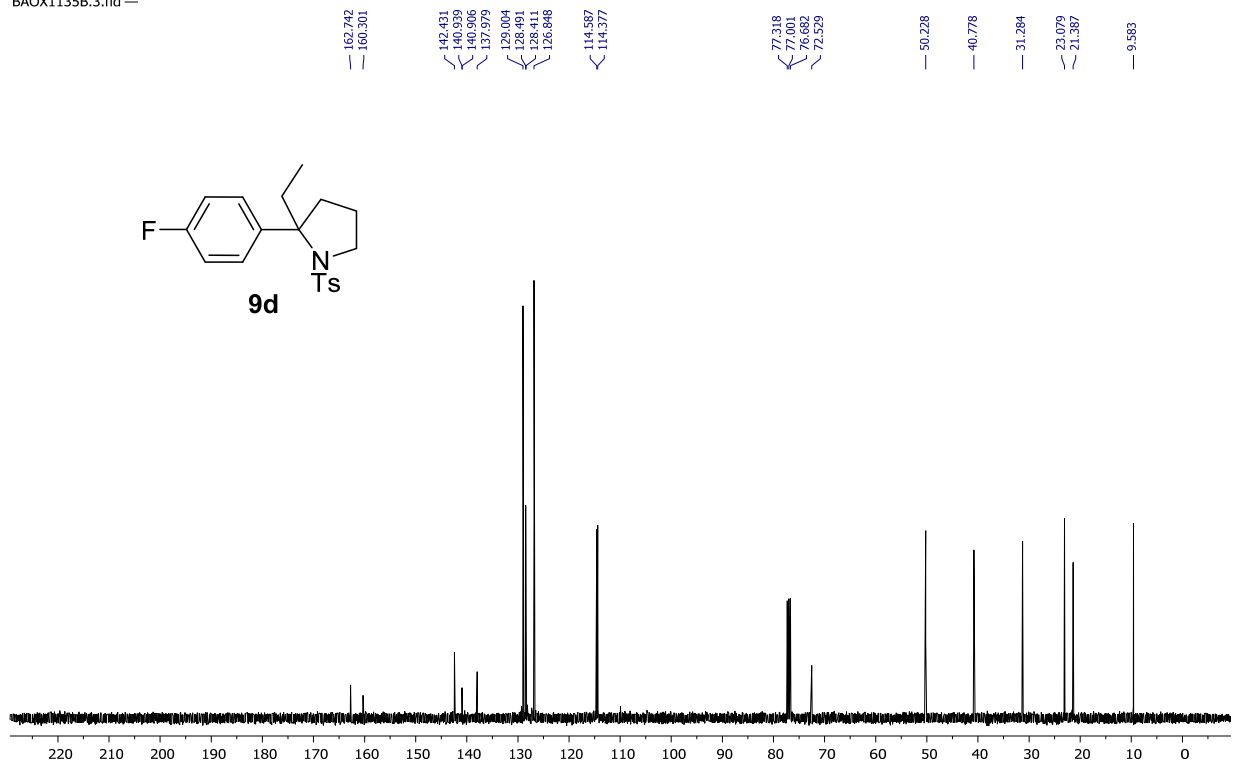

Supplementary Figure 87. <sup>1</sup>H and <sup>13</sup>C NMR spectra of 9d



BAOX1136A.1.fid —

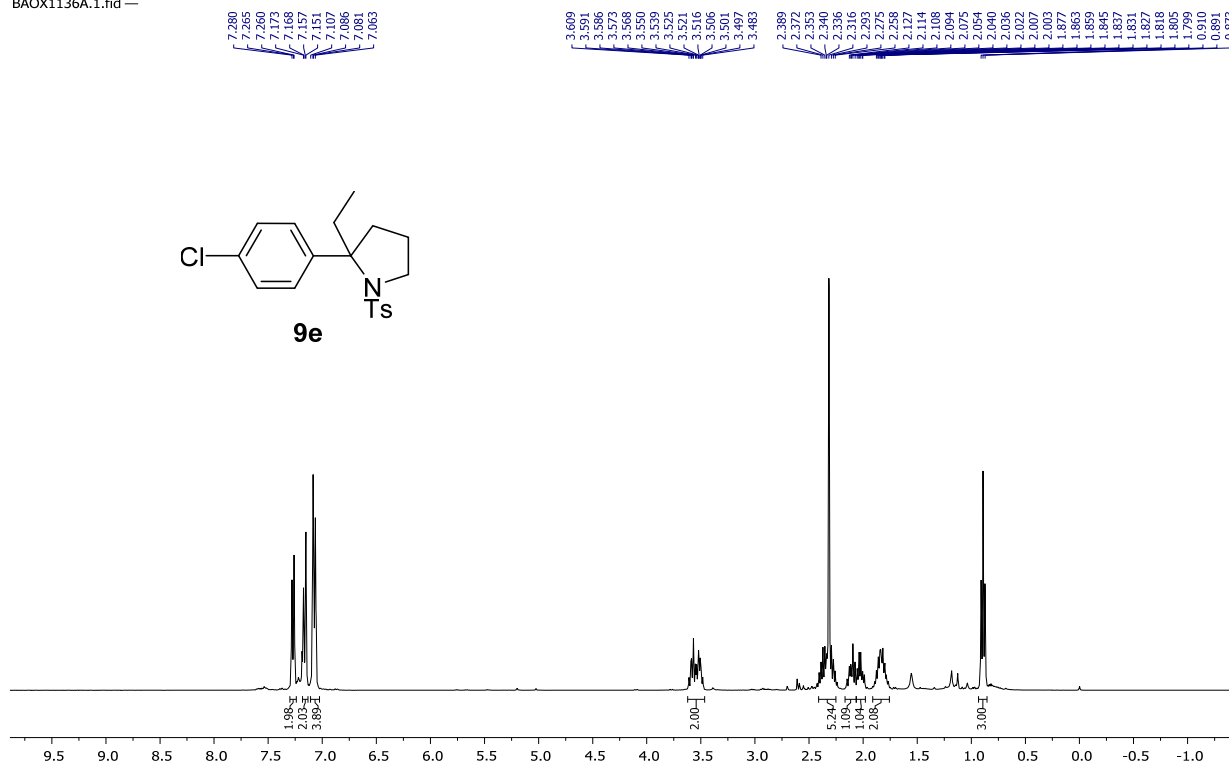

BAOX1136A.2.fid —

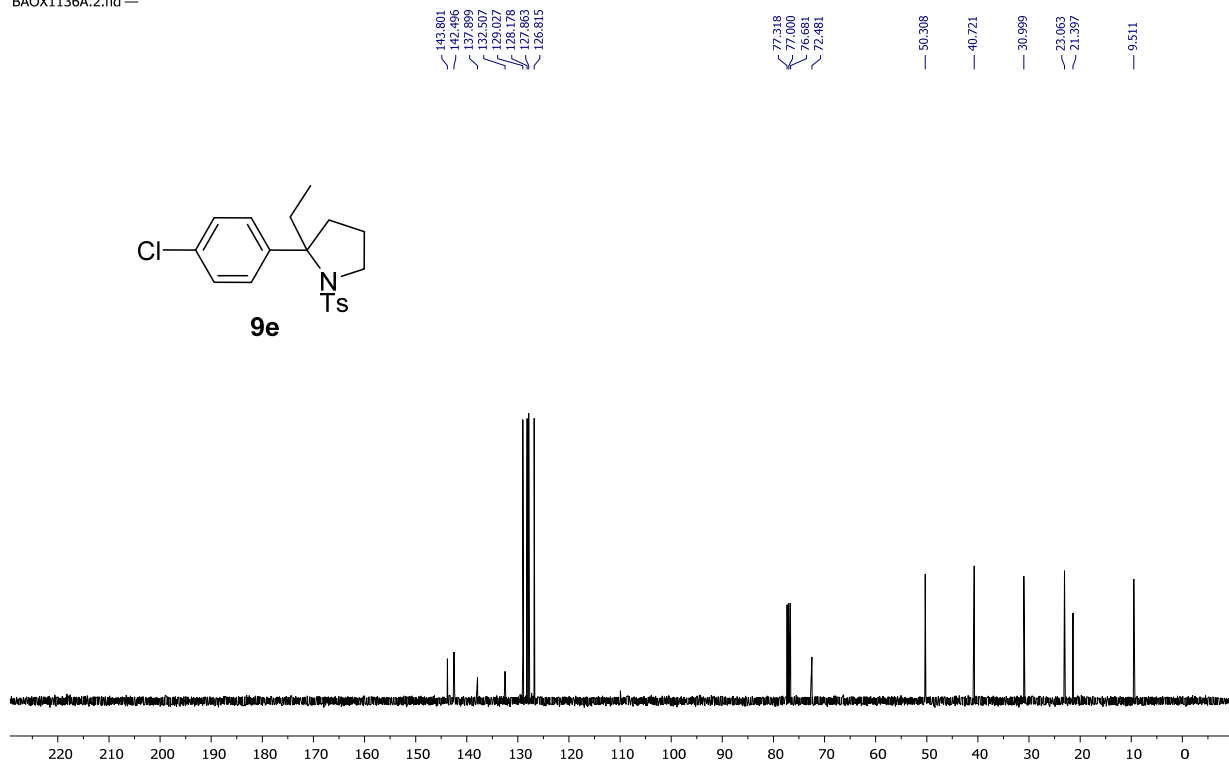

Supplementary Figure 88. <sup>1</sup>H and <sup>13</sup>C NMR spectra of 9e

BAOX1135C.1.fid —

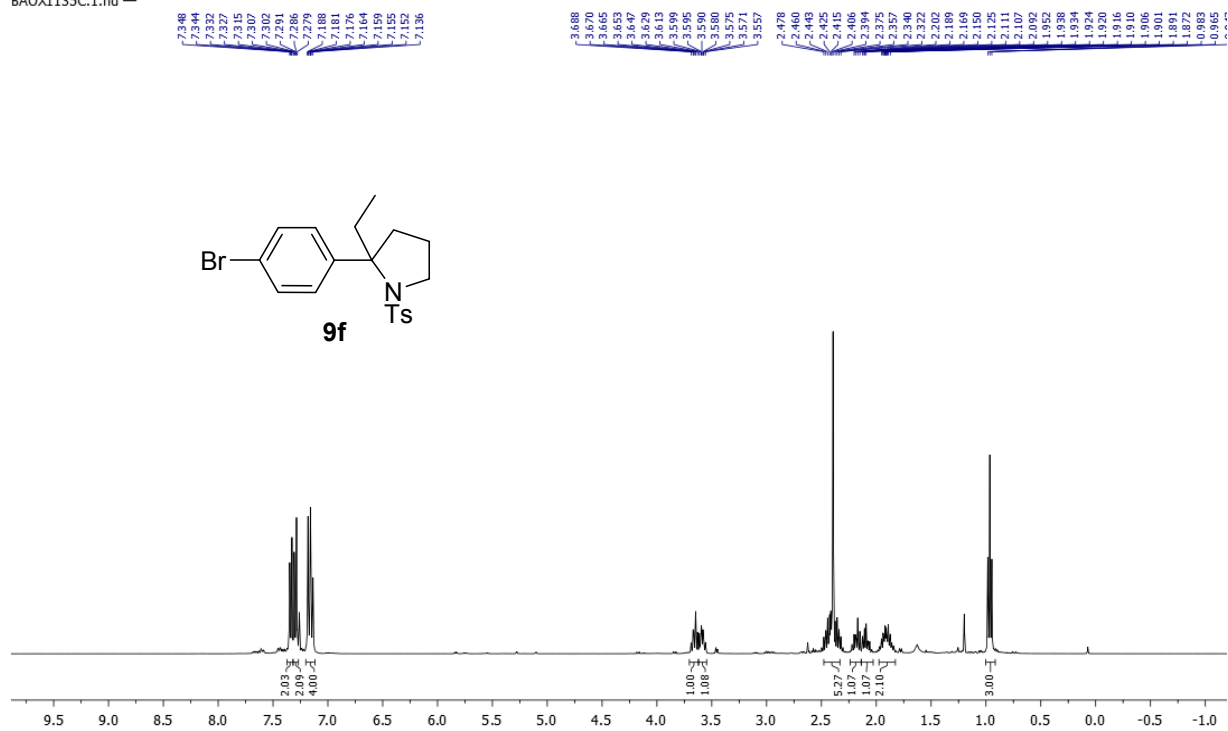

BAOX1135C.2.fid —

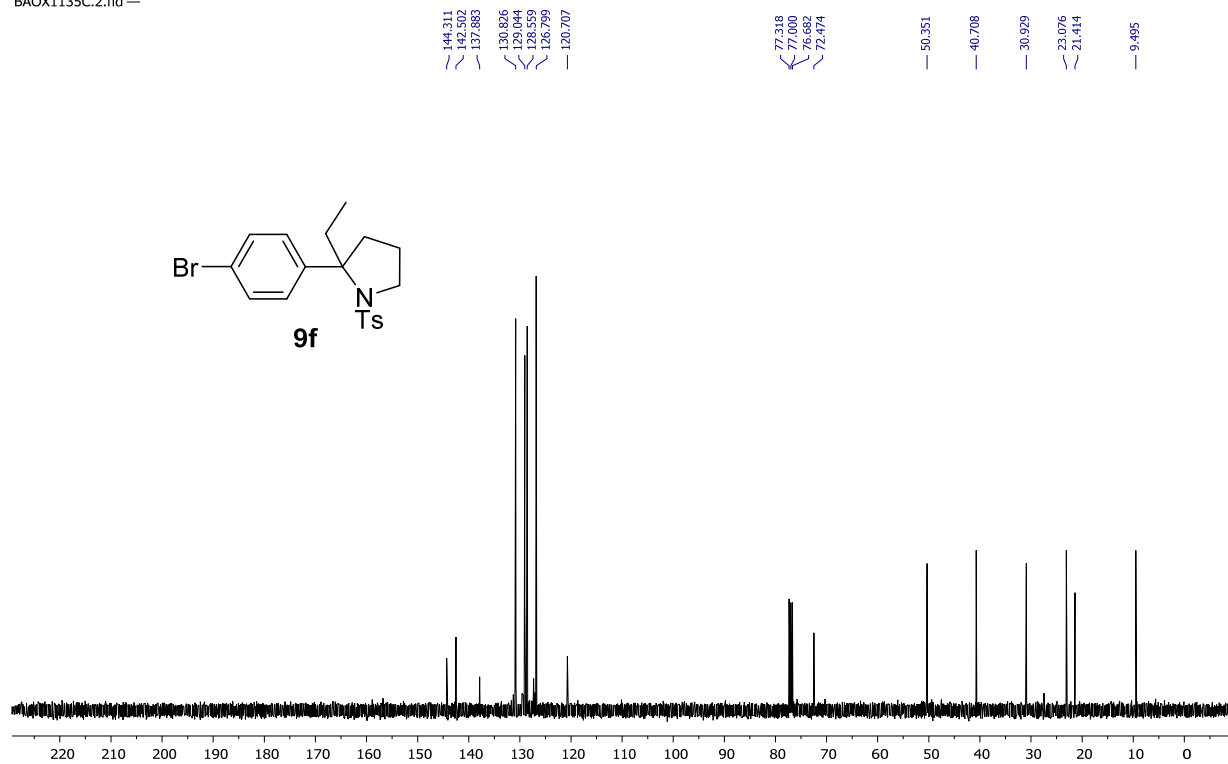

Supplementary Figure 89.  $^1\text{H}$  and  $^{13}\text{C}$  NMR spectra of 9f

BAOX1137A.1.fid —

7.658  
7.589  
7.571  
7.476  
7.457  
7.437  
7.415  
7.384  
7.378  
7.361  
7.351  
7.331  
7.103  
7.083  
3.752  
3.734  
3.728  
3.716  
3.711  
3.693  
3.684  
3.642  
3.635  
3.625  
3.618  
3.602  
3.574  
3.556  
3.539  
2.521  
2.500  
2.480  
2.462  
2.445  
2.439  
2.427  
2.414  
2.354  
2.252  
2.246  
2.233  
2.228  
2.212  
2.001  
1.986  
1.966  
1.951  
1.945  
1.933  
1.053  
1.035  
1.016

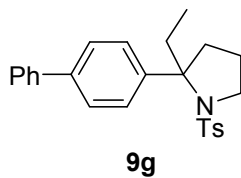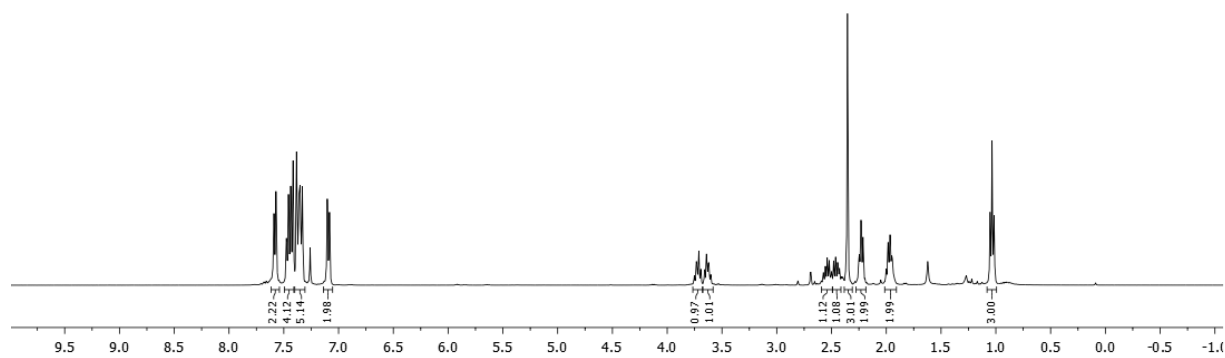

BAOX1137A.2.fid —

144.044  
143.645  
140.640  
139.421  
138.016  
128.922  
128.716  
127.262  
127.203  
126.816  
126.889  
126.427  
77.318  
77.001  
76.683  
72.654  
50.408  
40.808  
31.150  
23.237  
21.367  
9.598

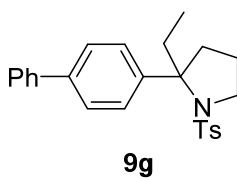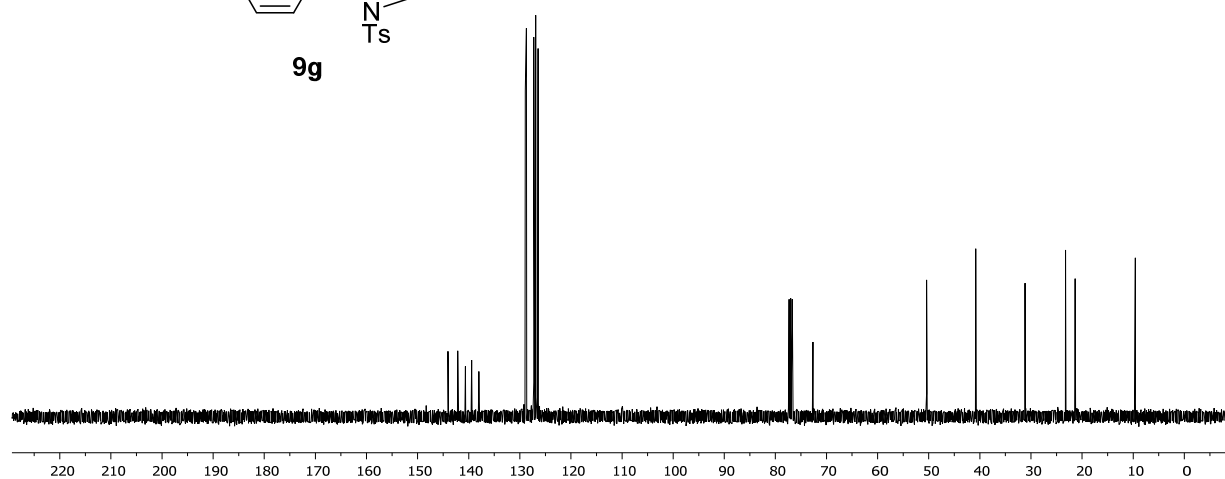

Supplementary Figure 90. <sup>1</sup>H and <sup>13</sup>C NMR spectra of **9g**

BAOX1137B2.1.fid —

7.187  
7.176  
7.160  
7.155  
7.136  
7.130  
7.115  
7.003  
6.983  
6.970  
6.954  
6.949

3.652  
3.634  
3.628  
3.617  
3.611  
3.594  
3.585  
3.497  
3.491  
3.481  
3.474  
3.457  
2.834  
2.817  
2.801  
2.782  
2.765

2.450  
2.432  
2.415  
2.397  
2.369  
2.350  
2.332  
2.315  
2.305  
2.293  
2.132  
2.114  
2.095  
1.895  
1.890  
1.871  
1.852  
1.845  
1.834  
1.826  
1.820  
1.808  
1.782  
1.166  
0.946  
0.928  
0.000

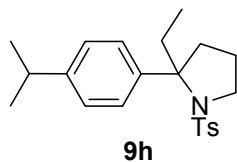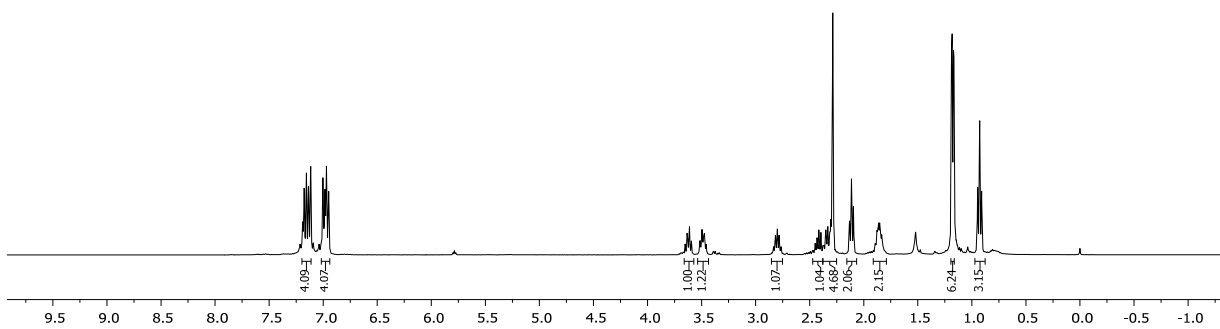

BAOX1137B2.2.fid —

147.112  
146.982  
141.982  
138.041  
128.834  
126.913  
126.849  
125.802

77.319  
77.002  
76.684  
72.567

50.362  
40.843  
33.511  
31.318  
24.057  
23.939  
23.309  
21.394  
9.630

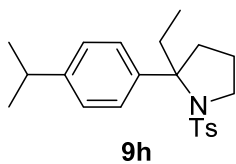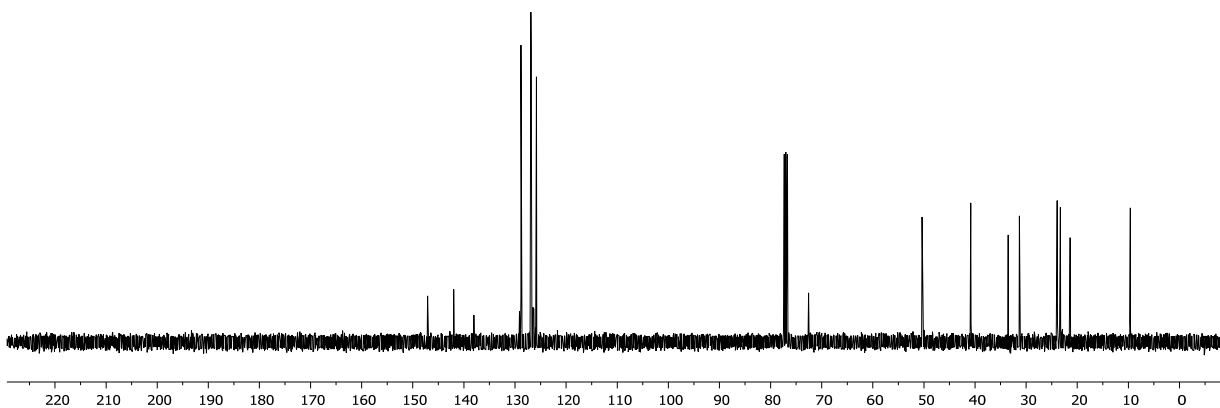

Supplementary Figure 91. <sup>1</sup>H and <sup>13</sup>C NMR spectra of 9h

BAOX1137C2.1.fid —

7.315  
7.298  
7.176  
7.169  
7.161  
7.156  
7.154  
7.151  
7.146  
7.134  
7.119  
7.115  
7.031  
7.027  
7.025  
7.021  
7.014  
7.005  
6.978  
6.974  
6.970  
3.764  
3.741  
3.727  
3.724  
3.706  
3.609  
3.594  
3.591  
3.586  
3.575  
3.571  
3.571  
3.560  
3.552  
2.593  
2.574  
2.556  
2.539  
2.521  
2.481  
2.481  
2.444  
2.438  
2.430  
2.426  
2.420  
2.417  
2.385  
2.385  
2.367  
2.349  
2.259  
2.239  
2.226  
2.210  
2.191  
2.176  
2.172  
2.157  
2.143  
2.140  
2.124  
1.991  
1.896  
1.898  
1.876  
1.976  
1.972  
1.960  
1.957  
1.954  
1.942  
1.939  
1.939  
1.923  
1.917  
1.912  
1.909  
1.904  
1.882  
1.072  
1.054  
1.054

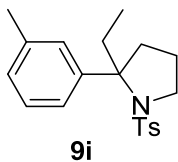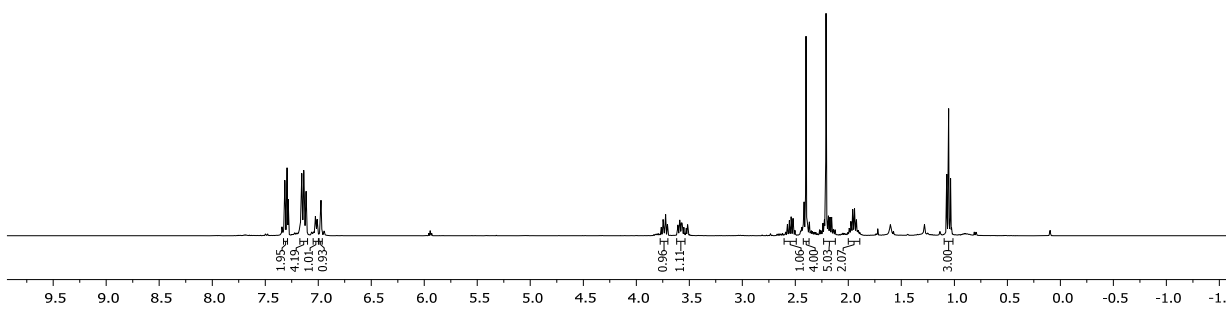

BAOX1137C2.2.fid —

145.071  
142.083  
137.949  
137.205  
128.860  
127.739  
127.727  
127.391  
126.924  
123.794  
77.318  
77.000  
76.683  
72.879  
50.412  
41.051  
31.282  
23.207  
21.520  
21.361  
9.571

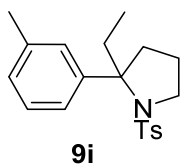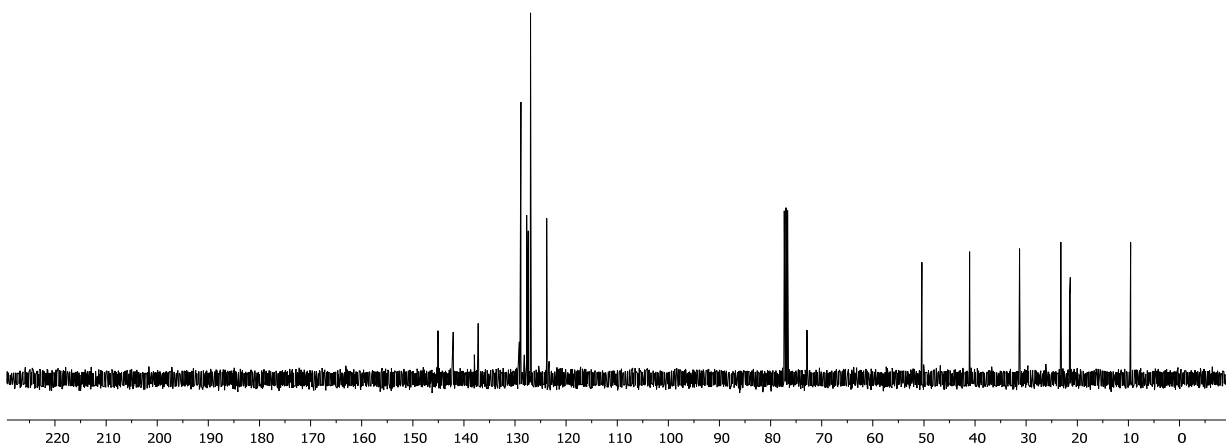

Supplementary Figure 92.  $^1\text{H}$  and  $^{13}\text{C}$  NMR spectra of **9i**

BAOX1136D3.1.fid — refe\_1H\_zq CDCl3 /opt/ xbao 5

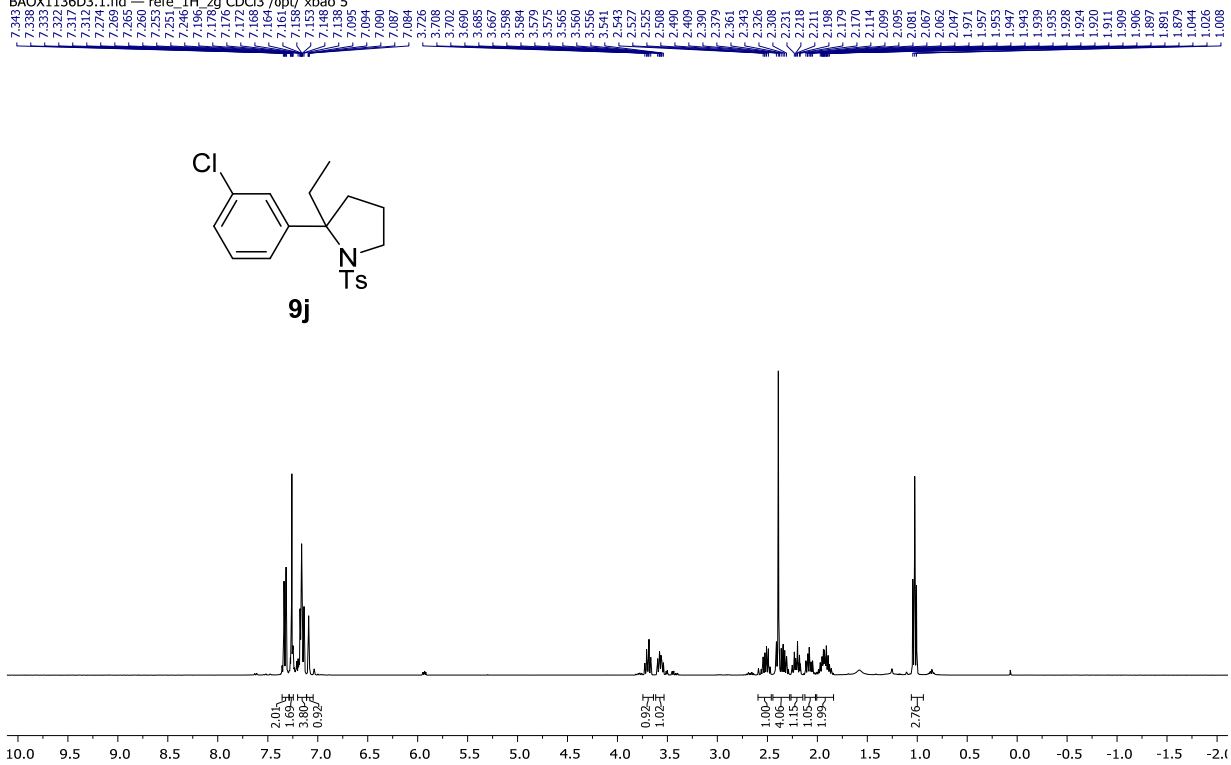

BAOX1136D2.2.fid —

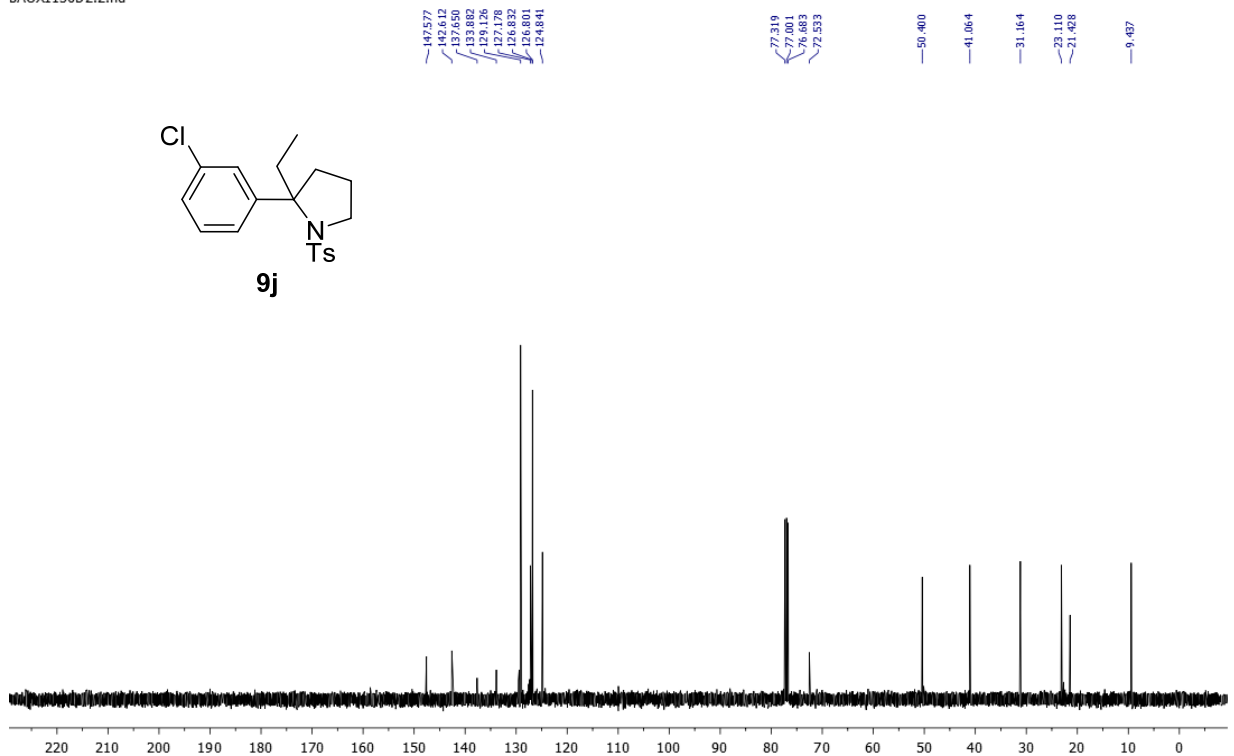

Supplementary Figure 93. <sup>1</sup>H and <sup>13</sup>C NMR spectra of 9j



BAOX1148A-A.1.fid — ChemInfo\_1Hzq CDCl3 /opt/ xbao 15

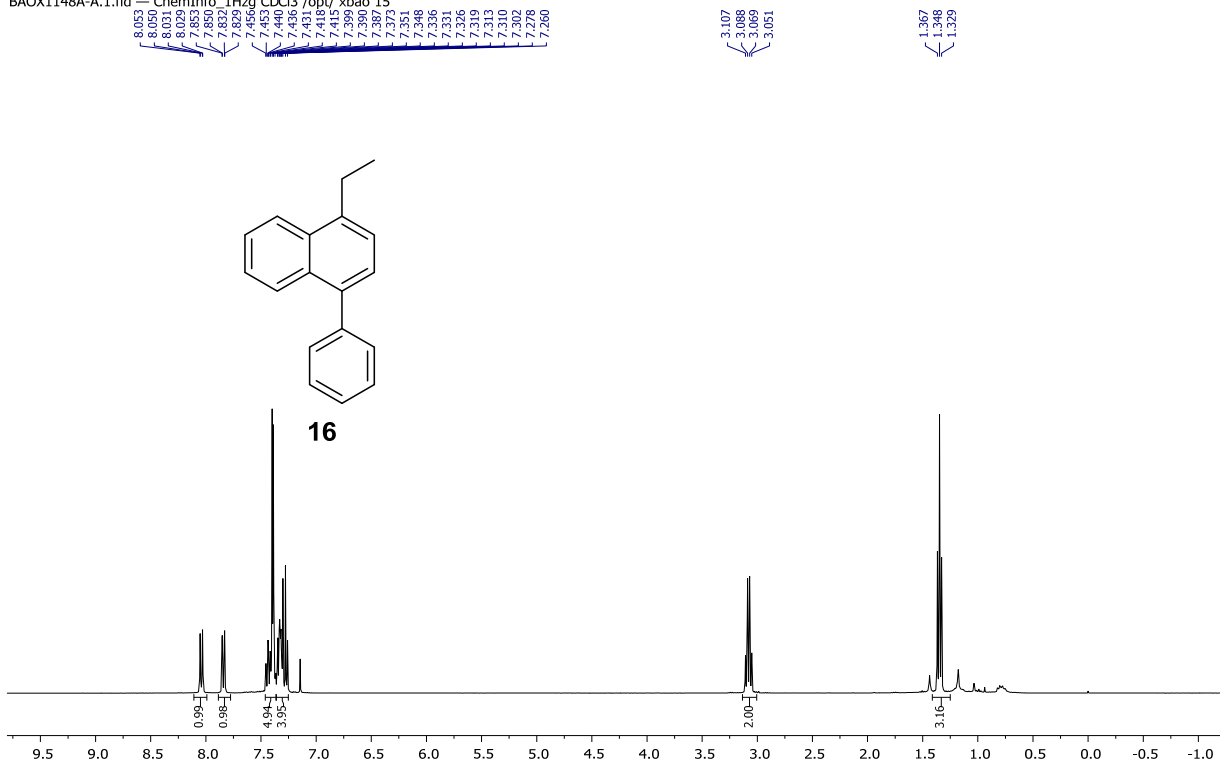

BAOX1148A-A.2.fid — ChemInfo\_13C\_cpd CDCl3 /opt/ xbao 15

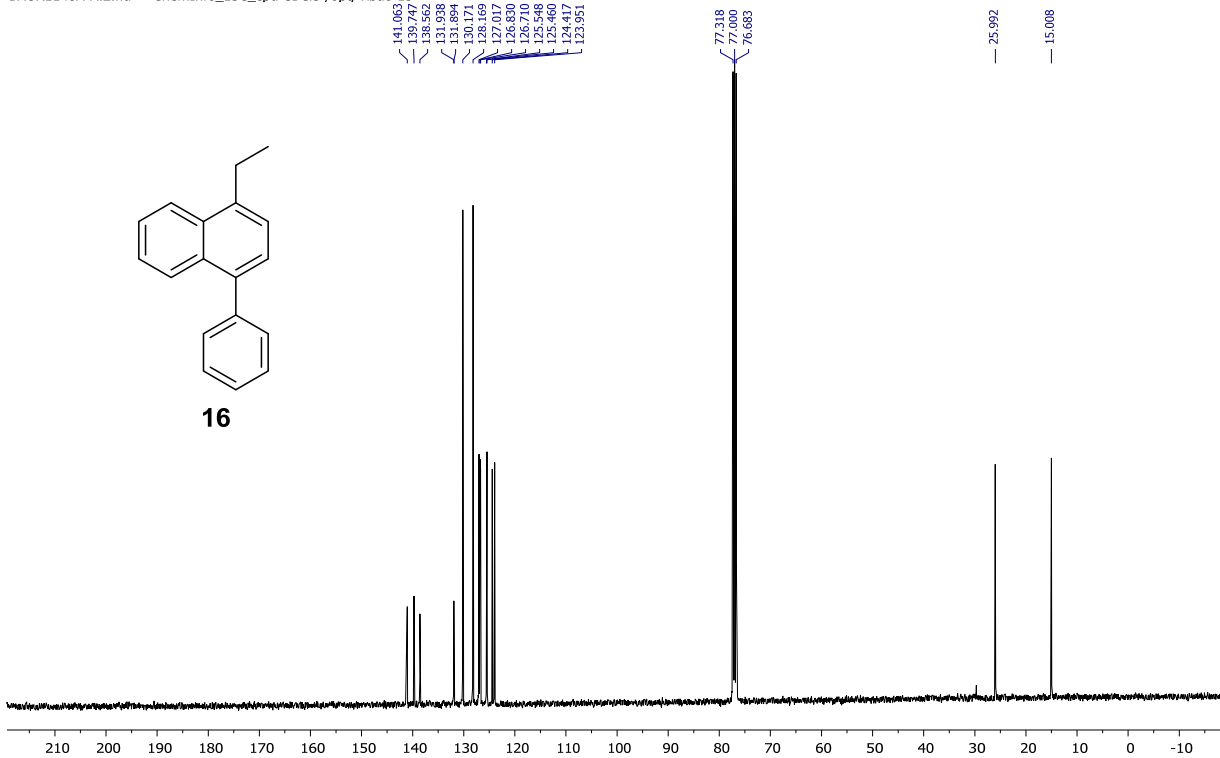

Supplementary Figure 95.  $^1\text{H}$  and  $^{13}\text{C}$  NMR spectra of 16



01ty099 1H product.1.fid  
ChemInfo\_1Hzg CDCI3 /opt

8.2265  
8.0061  
7.8933  
7.8706  
7.8533  
7.1914  
7.0882  
7.0627  
7.0257  
7.0094  
6.9889  
6.9541

2.2082  
2.1785  
2.1607  
2.1435  
2.1255  
2.1037  
2.0851  
2.0666  
1.9968  
1.9870  
1.9537  
1.9359  
1.9082  
1.8921  
1.6685  
1.6482  
1.6298  
1.6145  
1.5947  
1.5766  
1.5649  
1.5519  
1.5337  
1.5169  
1.4989  
1.4771  
1.4551  
0.5460  
0.5421  
0.5278  
0.5238  
0.5095  
0.5055

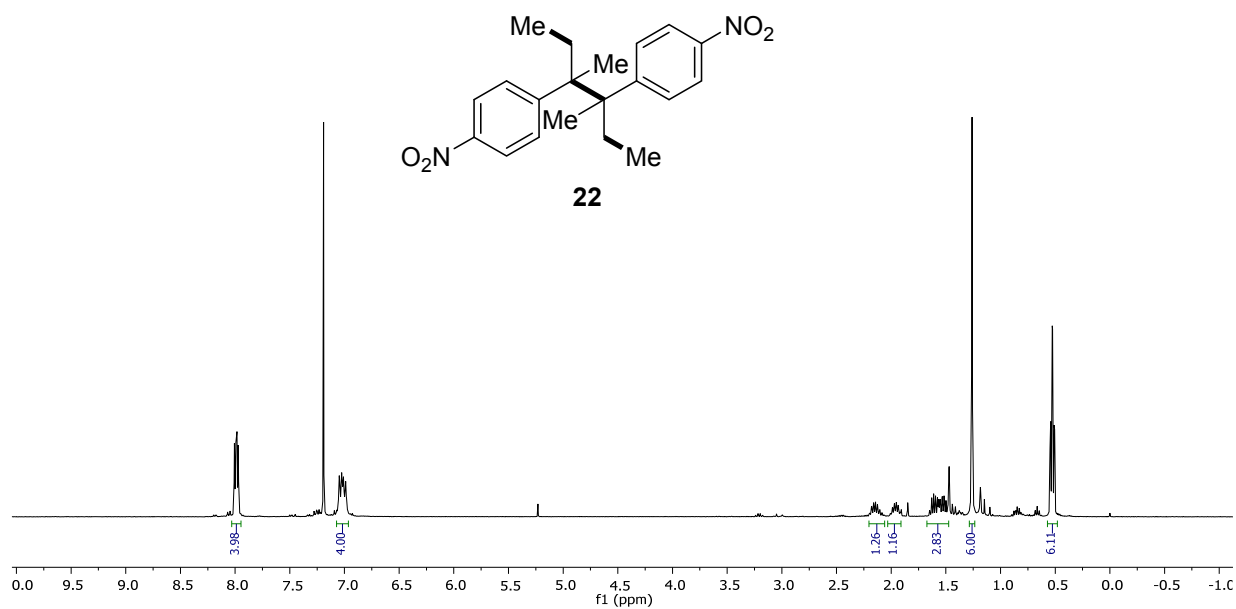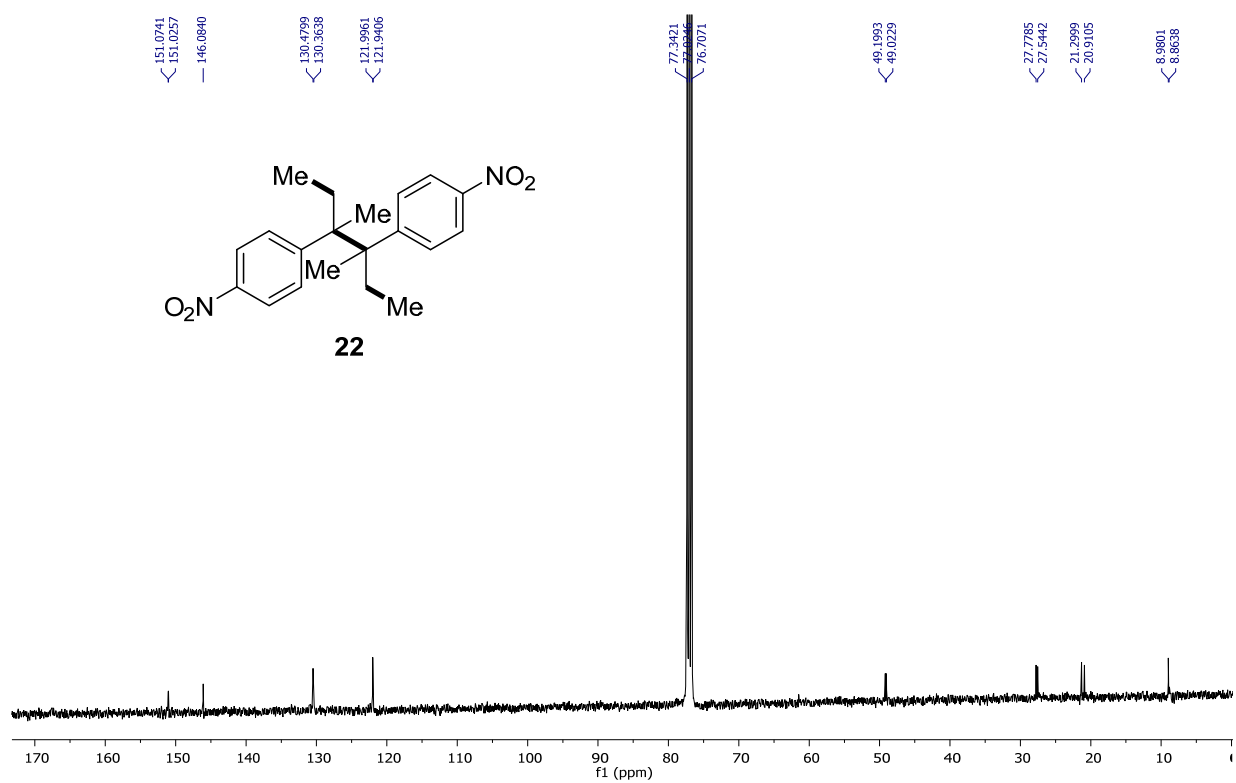

Supplementary Figure 96. <sup>1</sup>H and <sup>13</sup>C NMR spectra of 22

## Supplementary Tables

Supplementary Table 1. 1,2-Methoxy methylation of alkenes: optimization of reaction conditions.<sup>a</sup>

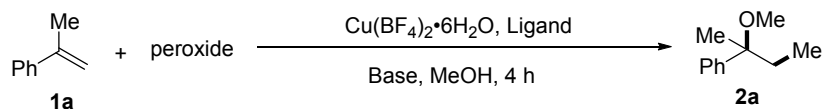

| Entry           | Peroxide  | Ligand    | Base (equiv)                           | Yield (%) <sup>f</sup> |
|-----------------|-----------|-----------|----------------------------------------|------------------------|
| 1               | DTBP      | <b>L4</b> | Na <sub>3</sub> PO <sub>4</sub> (1.0)  | 23                     |
| 2               | DCP       | <b>L4</b> | Na <sub>3</sub> PO <sub>4</sub> (1.0)  | 52                     |
| 3               | PhCO-OtBu | <b>L4</b> | Na <sub>3</sub> PO <sub>4</sub> (1.0)  | 29                     |
| 4               | tBuO-OH   | <b>L4</b> | Na <sub>3</sub> PO <sub>4</sub> (1.0)  | 6                      |
| 5               | DCP       | <b>L2</b> | Na <sub>3</sub> PO <sub>4</sub> (1.0)  | 52                     |
| 6               | DCP       | <b>L3</b> | Na <sub>3</sub> PO <sub>4</sub> (1.0)  | 50                     |
| 7               | DCP       | <b>L1</b> | Na <sub>3</sub> PO <sub>4</sub> (1.0)  | 87                     |
| 8               | DCP       | <b>L1</b> | Na <sub>3</sub> PO <sub>4</sub> (1.0)  | 44                     |
| 9 <sup>b</sup>  | DCP       | <b>L1</b> | Na <sub>3</sub> PO <sub>4</sub> (1.0)  | 52                     |
| 10 <sup>b</sup> | DCP       | <b>L1</b> | Na <sub>3</sub> PO <sub>4</sub> (0.5)  | 83                     |
| 11 <sup>c</sup> | DCP       | <b>L1</b> | Na <sub>3</sub> PO <sub>4</sub> (0.2)  | 80                     |
| 12 <sup>d</sup> | DCP       | <b>L1</b> | Na <sub>3</sub> PO <sub>4</sub> (0.1)  | 48                     |
| 13 <sup>c</sup> | DCP       | <b>L1</b> | Na <sub>2</sub> HPO <sub>4</sub> (0.2) | 93                     |
| 14 <sup>c</sup> | DCP       | <b>L1</b> | NaH <sub>2</sub> PO <sub>4</sub> (0.2) | 88                     |
| 15 <sup>c</sup> | DCP       | <b>L1</b> | Na <sub>3</sub> PO <sub>4</sub> (0.2)  | 61                     |
| 16 <sup>c</sup> | DCP       | <b>L1</b> | K <sub>2</sub> CO <sub>3</sub> (0.2)   | 19                     |
| 17 <sup>c</sup> | DCP       | <b>L1</b> | Imidazole (0.2)                        | 26                     |
| 18 <sup>c</sup> | DCP       | <b>L1</b> | Et <sub>3</sub> N (0.2)                | 34                     |
| 19 <sup>e</sup> | DCP       | <b>L1</b> | Na <sub>2</sub> HPO <sub>4</sub> (0.2) | 97 (96) <sup>g</sup>   |

<sup>a</sup>The reaction was performed in a sealed tube. **1a** (0.2 mmol), DCP (0.8 mmol), Cu(BF<sub>4</sub>)<sub>2</sub>·6H<sub>2</sub>O (1.0 equiv), ligand (1.5 equiv), Na<sub>3</sub>PO<sub>4</sub> (0.2 mmol), MeOH (4.0 mL, c 0.05 M), 140 °C, 4 h. <sup>b</sup>Cu(BF<sub>4</sub>)<sub>2</sub>·6H<sub>2</sub>O (0.5 equiv), **L1** (0.75 equiv). <sup>c</sup>Cu(BF<sub>4</sub>)<sub>2</sub>·6H<sub>2</sub>O (0.2 equiv), **L1** (0.3 equiv). <sup>d</sup>Cu(BF<sub>4</sub>)<sub>2</sub>·6H<sub>2</sub>O (0.1 equiv), **L1** (0.15 equiv). <sup>e</sup>Cu(BF<sub>4</sub>)<sub>2</sub>·6H<sub>2</sub>O (0.2 equiv), **L1** (0.3 equiv), c 0.1 M, 120 °C. <sup>f</sup>Determined by <sup>1</sup>H NMR spectroscopy using CH<sub>2</sub>Br<sub>2</sub> as an internal standard. <sup>g</sup>Yield of isolated product in parenthesis. DCP = dicumyl peroxide; DTBP = di-tertbutyl peroxide.

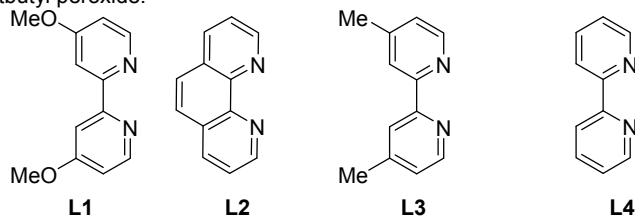

Supplementary Table 2 . 1,2-Azido methylation of alkenes: optimization of reaction conditions.<sup>a</sup>

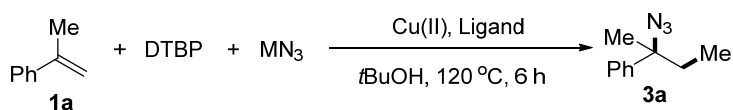

| Entry             | MN <sub>3</sub>  | Cu salt                                              | Ligand    | Yield (%) <sup>f</sup> |
|-------------------|------------------|------------------------------------------------------|-----------|------------------------|
| 1                 | NaN <sub>3</sub> | Cu(BF <sub>4</sub> ) <sub>2</sub> ·6H <sub>2</sub> O | ---       | 50                     |
| 2                 | LiN <sub>3</sub> | Cu(BF <sub>4</sub> ) <sub>2</sub> ·6H <sub>2</sub> O | ---       | 55                     |
| 3                 | KN <sub>3</sub>  | Cu(BF <sub>4</sub> ) <sub>2</sub> ·6H <sub>2</sub> O | ---       | 22                     |
| 4                 | LiN <sub>3</sub> | Cu(BF <sub>4</sub> ) <sub>2</sub> ·6H <sub>2</sub> O | <b>L1</b> | 47                     |
| 5                 | LiN <sub>3</sub> | Cu(BF <sub>4</sub> ) <sub>2</sub> ·6H <sub>2</sub> O | <b>L4</b> | 37                     |
| 6                 | LiN <sub>3</sub> | Cu(BF <sub>4</sub> ) <sub>2</sub> ·6H <sub>2</sub> O | <b>L3</b> | 26                     |
| 7                 | LiN <sub>3</sub> | Cu(BF <sub>4</sub> ) <sub>2</sub> ·6H <sub>2</sub> O | <b>L2</b> | 59                     |
| 8                 | LiN <sub>3</sub> | Cu(OAc) <sub>2</sub>                                 | <b>L2</b> | 58                     |
| 9                 | LiN <sub>3</sub> | Cu(OTf) <sub>2</sub>                                 | <b>L2</b> | 54                     |
| 10                | LiN <sub>3</sub> | CuF <sub>2</sub>                                     | <b>L2</b> | 59                     |
| 11                | LiN <sub>3</sub> | CuSO <sub>4</sub>                                    | <b>L2</b> | 73                     |
| 12 <sup>b</sup>   | LiN <sub>3</sub> | CuSO <sub>4</sub>                                    | <b>L2</b> | 72                     |
| 13 <sup>c</sup>   | LiN <sub>3</sub> | CuSO <sub>4</sub>                                    | <b>L2</b> | 82                     |
| 14 <sup>d</sup>   | LiN <sub>3</sub> | CuSO <sub>4</sub>                                    | <b>L2</b> | 84 (81) <sup>g</sup>   |
| 15 <sup>d,e</sup> | LiN <sub>3</sub> | CuSO <sub>4</sub>                                    | <b>L2</b> | 82                     |

<sup>a</sup>**1a** (0.2 mmol), MN<sub>3</sub> (1.0 mmol), Cu(II) (0.04 mmol), ligand (0.06 mmol), DTBP (0.8 mmol), *t*BuOH (2.0 mL). <sup>b</sup>CuSO<sub>4</sub> (0.02 mmol, 0.1 equiv), **L2** (0.03 mmol), 120 °C. <sup>c</sup>CuSO<sub>4</sub> (0.01 mmol, 0.05 equiv), **L2** (0.015 mmol). <sup>d</sup>CuSO<sub>4</sub> (0.002 mmol, 0.01 equiv), **L2** (0.006 mmol). <sup>e</sup>aqueous solution of LiN<sub>3</sub> (0.5 mmol, 2.5 equiv). <sup>f</sup>Yield was determined by <sup>1</sup>H NMR spectroscopy with DMAP as an internal standard. <sup>g</sup>Yield of isolated product in parenthesis.

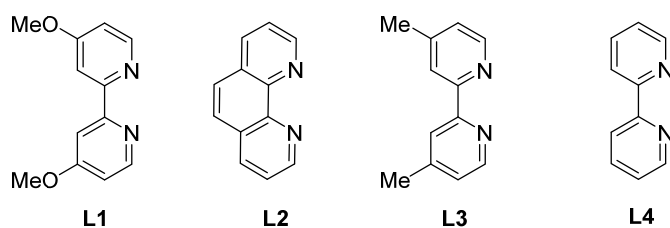

**Supplementary Table 3 . Copper-catalyzed methylative alkoxylation of alkene 4a providing tetrahydrofuran 5a: optimization of reaction conditions.<sup>a</sup>**

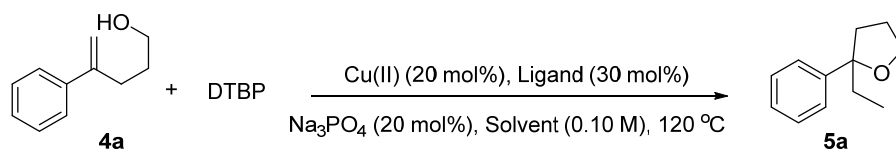

| Entry | Cu(II)                                               | Solvent                            | Ligand | Yield <sup>b</sup>     |
|-------|------------------------------------------------------|------------------------------------|--------|------------------------|
| 1     | Cu(BF <sub>4</sub> ) <sub>2</sub> ·6H <sub>2</sub> O | <sup>t</sup> BuOH                  | L1     | 57%                    |
| 2     | Cu(BF <sub>4</sub> ) <sub>2</sub> ·6H <sub>2</sub> O | <sup>t</sup> BuCN                  | L1     | 30%                    |
| 3     | Cu(BF <sub>4</sub> ) <sub>2</sub> ·6H <sub>2</sub> O | CF <sub>3</sub> CH <sub>2</sub> OH | L1     | 81%                    |
| 4     | Cu(OAc) <sub>2</sub>                                 | CF <sub>3</sub> CH <sub>2</sub> OH | L1     | 52%                    |
| 5     | CuSO <sub>4</sub>                                    | CF <sub>3</sub> CH <sub>2</sub> OH | L1     | 59%                    |
| 6     | Cu(OTf) <sub>2</sub>                                 | CF <sub>3</sub> CH <sub>2</sub> OH | L1     | 84% (82%) <sup>c</sup> |
| 7     | CuF <sub>2</sub>                                     | CF <sub>3</sub> CH <sub>2</sub> OH | L1     | 54%                    |
| 8     | Cu(OTf) <sub>2</sub>                                 | CF <sub>3</sub> CH <sub>2</sub> OH | L4     | 62%                    |
| 9     | Cu(OTf) <sub>2</sub>                                 | CF <sub>3</sub> CH <sub>2</sub> OH | L3     | 63%                    |
| 10    | Cu(OTf) <sub>2</sub>                                 | CF <sub>3</sub> CH <sub>2</sub> OH | L5     | 63%                    |
| 11    | Cu(OTf) <sub>2</sub>                                 | CF <sub>3</sub> CH <sub>2</sub> OH | L2     | 32%                    |

<sup>a</sup>4a (0.2 mmol), Cu(II) (0.04 mmol), ligand (0.06 mmol), DTBP (0.8 mmol), Na<sub>3</sub>PO<sub>4</sub> (0.04 mmol), solvent (2.0 mL). <sup>b</sup>Yield was determined by <sup>1</sup>H NMR spectroscopy with DMAP as an internal standard. <sup>c</sup>Yield of the isolated product in parenthesis.

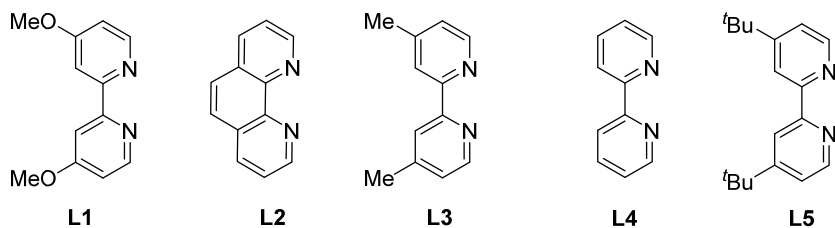

**Supplementary Table 4 . Copper-catalyzed methylative lactonization of alkene 6a providing lactone 7a: optimization of reaction conditions.<sup>a</sup>**

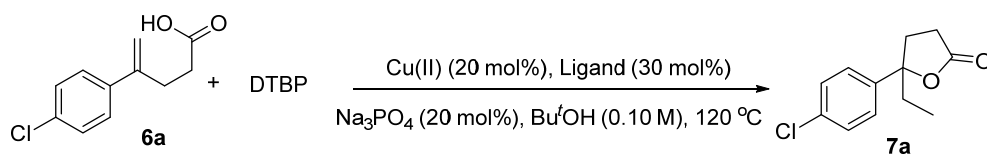

| Entry | Cu(II)                                               | Ligand    | Yield <sup>b</sup>     |
|-------|------------------------------------------------------|-----------|------------------------|
| 1     | Cu(BF <sub>4</sub> ) <sub>2</sub> ·6H <sub>2</sub> O | <b>L1</b> | 73%                    |
| 2     | Cu(OAc) <sub>2</sub>                                 | <b>L1</b> | 69%                    |
| 3     | CuSO <sub>4</sub>                                    | <b>L1</b> | 81% (76%) <sup>c</sup> |
| 4     | Cu(OTf) <sub>2</sub>                                 | <b>L1</b> | 64%                    |
| 5     | Cu(acac) <sub>2</sub>                                | <b>L1</b> | 62%                    |
| 6     | CuSO <sub>4</sub>                                    | <b>L4</b> | 76%                    |
| 7     | CuSO <sub>4</sub>                                    | <b>L3</b> | 68%                    |
| 8     | CuSO <sub>4</sub>                                    | <b>L5</b> | 69%                    |
| 9     | CuSO <sub>4</sub>                                    | <b>L2</b> | 56%                    |

<sup>a</sup>**6a** (0.2 mmol), Cu(II) (0.04 mmol), ligand (0.06 mmol), DTBP (0.8 mmol), Na<sub>3</sub>PO<sub>4</sub> (0.04 mmol), Bu<sup>t</sup>OH (2.0 mL). <sup>b</sup>Yield was determined by <sup>1</sup>H NMR spectroscopy with DMAP as an internal standard. <sup>c</sup>Yield of the isolated product in parenthesis.

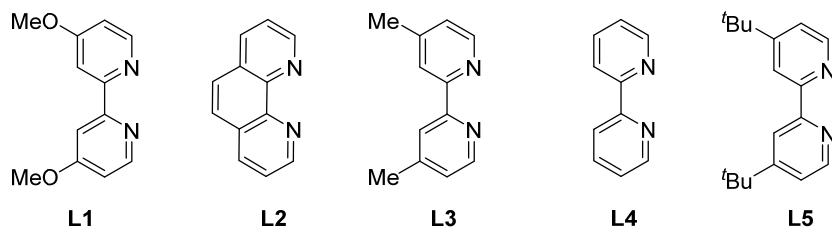

**Supplementary Table 5. Copper-catalyzed methylative cycloamination of alkene 8a: optimization of reaction conditions.**

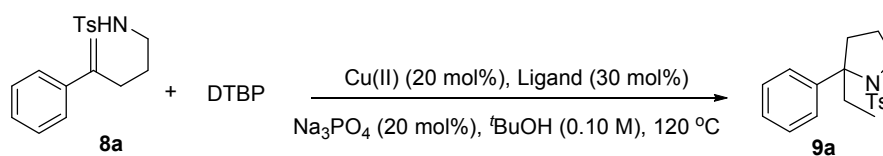

| Entry | Cu(II)                                               | Ligand    | Yield <sup>b</sup>     |
|-------|------------------------------------------------------|-----------|------------------------|
| 1     | Cu(BF <sub>4</sub> ) <sub>2</sub> ·6H <sub>2</sub> O | <b>L1</b> | 36%                    |
| 2     | Cu(OAc) <sub>2</sub>                                 | <b>L1</b> | 65%                    |
| 3     | CuSO <sub>4</sub>                                    | <b>L1</b> | Trace                  |
| 4     | CuF <sub>2</sub>                                     | <b>L1</b> | Trace                  |
| 5     | Cu(OTf) <sub>2</sub>                                 | <b>L1</b> | 27%                    |
| 6     | Cu(OAc) <sub>2</sub>                                 | <b>L5</b> | 53%                    |
| 7     | Cu(OAc) <sub>2</sub>                                 | <b>L3</b> | 44%                    |
| 8     | Cu(OAc) <sub>2</sub>                                 | <b>L6</b> | 42%                    |
| 9     | Cu(OAc) <sub>2</sub>                                 | <b>L2</b> | 75% (71%) <sup>c</sup> |

<sup>a</sup>**8a** (0.2 mmol), Cu(II) (0.04 mmol), ligand (0.06 mmol), DTBP (0.8 mmol), <sup>t</sup>BuOH (2.0 mL). <sup>b</sup>Yield was determined by <sup>1</sup>H NMR spectroscopy with DMAP as an internal standard. <sup>c</sup>Yield of the isolated product in parenthesis.

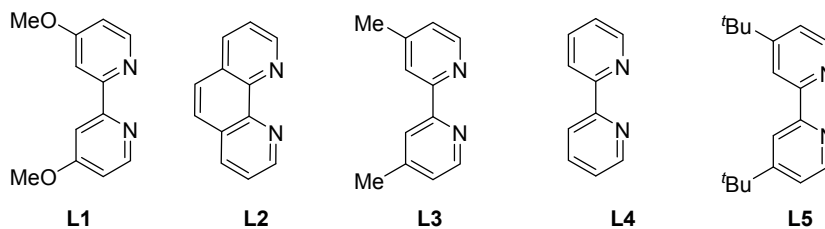

## Supplementary Methods

### General Information.

#### General Analytical Information.

NMR spectra were recorded on a Brüker AvanceIII-400, Brüker Avance-400 or Brüker DPX-400 spectrometer at room temperature,  $^1\text{H}$  frequency is at 400.13 MHz,  $^{13}\text{C}$  frequency is at 100.62 MHz. Chemical shifts ( $\delta$ ) were reported in parts per million (ppm) relative to residual solvent peaks rounded to the nearest 0.01 for proton and 0.1 for carbon (*ref: CHCl<sub>3</sub> [ $^1\text{H}$ : 7.26,  $^{13}\text{C}$ : 77.16]*). Coupling constants ( $J$ ) were reported in Hz to the nearest 0.1 Hz. Peak multiplicity was indicated as follows s (singlet), d (doublet), t (triplet), q (quartet), m (multiplet) and br (broad). Attribution of peaks was done using the multiplicities and integrals of the peaks.

IR spectra were recorded in a Jasco FT/IR-4100 spectrometer outfitted with a PIKE technology MIRacle™ ATR accessory as neat films compressed onto a Zinc Selenide window. The spectra were reported in  $\text{cm}^{-1}$ .

The accurate masses were measured by the mass spectrometry service of the EPFL by ESI-TOF using a QTOF Ultima from Waters or APPI-FT-ICR using a linear ion trap Fourier transform ion cyclotron resonance mass spectrometer from Thermo Scientific.

Melting points were measured using a Stuart SMP30

#### Materials and Methods.

Unless otherwise stated, starting materials were purchased from Aldrich and/or Fluka. Solvents were purchased in HPLC quality, degassed by purging thoroughly with nitrogen and dried over activated molecular sieves of appropriate size. Alternatively, they were purged with argon and passed through alumina columns in a solvent purification system (Innovative Technology). Conversion was monitored by thin layer chromatography (TLC) using Merck TLC silica gel 60 F254. Compounds were visualized by UV light at 254 nm and by dipping the plates in an ethanolic vanillin/sulfuric acid solution or an aqueous potassium permanganate solution followed by heating. Flash column chromatography was performed over silica gel (230–400 mesh).

#### General procedure

#### Synthesis and characterization data of alcohols 4

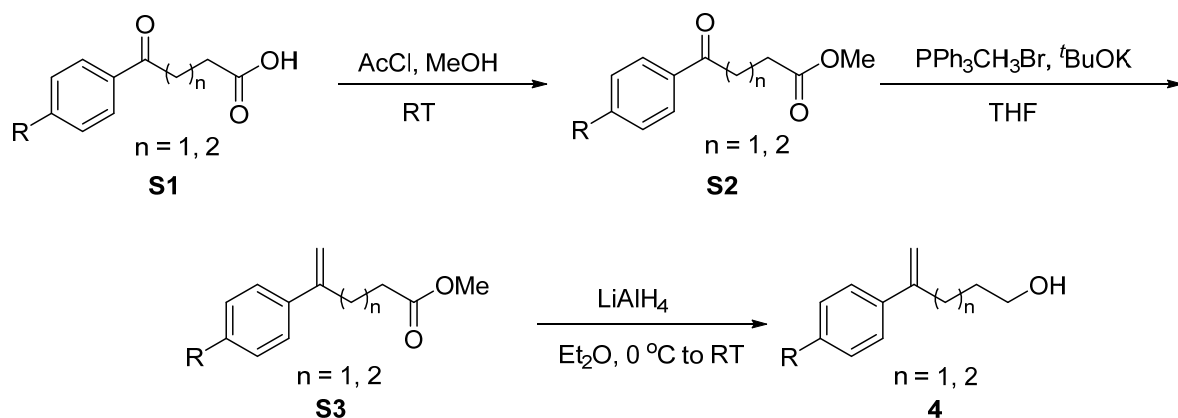

#### General procedure A:

To a solution of **S1** (10.0 mmol) in  $\text{MeOH}$  (15 mL) was added  $\text{AcCl}$  (cat.) at  $0\text{ }^\circ\text{C}$ . After being stirred at room temperature for 9 h, the solvent was evaporated under reduced pressure to give the crude product **S2** which was used for the next reaction without further purification.

To a suspension of  $\text{PPh}_3\text{CH}_3\text{Br}$  (3.93 g, 11.0 mmol, 1.1 equiv) in  $\text{THF}$  (30 mL) was added  $t\text{BuOK}$  (1.23 g, 11.0 mmol, 1.1 equiv) at  $0\text{ }^\circ\text{C}$ . The reaction mixture was stirred at room temperature for 0.5 h, then cooled down to  $0\text{ }^\circ\text{C}$ . A solution of **S2** obtained above in  $\text{THF}$  (5 mL) was added. After being stirred at room temperature for 10 h, the reaction was quenched by addition of water. The organic phase was separated and the aqueous phase was extracted with  $\text{Et}_2\text{O}$ . The combined organic extracts were washed with brine, dried over  $\text{Na}_2\text{SO}_4$ . The solvent was evaporated under reduced pressure. The residue was purified by flash chromatograph ( $\text{SiO}_2$ , eluent:  $\text{PE}/\text{EtOAc} = 10/1$ ) to afford the desired product **S3**.

To a suspension of  $\text{LiAlH}_4$  (0.38 g, 10.0 mmol, 2.0 equiv) in  $\text{Et}_2\text{O}$  (20 mL) was added a solution of **S3** (5.0 mmol, 1.0 equiv) in  $\text{Et}_2\text{O}$  (3 mL) at  $0\text{ }^\circ\text{C}$ . The reaction mixture was stirred at room temperature for 4 h, then cooled to  $0\text{ }^\circ\text{C}$ , and water (0.4 mL), 15%  $\text{NaOH}$  (0.4 mL), water (1.2 mL) were added dropwise sequentially. The reaction mixture was stirred for 15 min., then filtered through Celite, and the filtrate was evaporated under reduced pressure. The residue was purified by flash chromatograph ( $\text{SiO}_2$ , eluent:  $\text{PE}/\text{EtOAc} = 4/1$ ) to afford the desired product **4**.



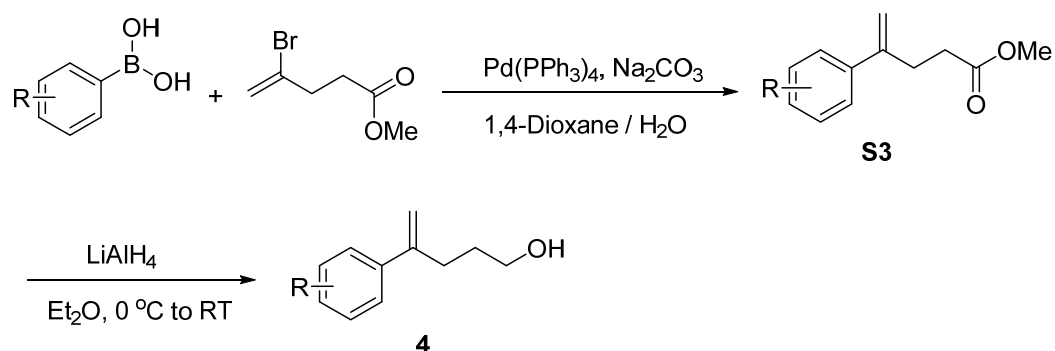

#### General procedure B:

To a solution of methyl 4-bromopent-4-enoate (0.96 g, 5.0 mmol, 1.0 equiv) and aryl boronic acid (6.0 mmol, 1.2 equiv) in 1,4-dioxane/H<sub>2</sub>O (70 mL / 10 mL) was added Pd(PPh<sub>3</sub>)<sub>4</sub> (0.58 g) and Na<sub>2</sub>CO<sub>3</sub> (1.17 g, 11.0 mmol, 2.2 equiv) under N<sub>2</sub> atmosphere. After being stirred at 110 °C for 10 h, the reaction mixture was quenched by addition of aqueous water. The organic phase was separated and the aqueous phase was extracted with Et<sub>2</sub>O. The combined organic extracts were washed with brine, dried over Na<sub>2</sub>SO<sub>4</sub>. The solvent was evaporated under reduced pressure. The residue was purified by flash chromatograph (SiO<sub>2</sub>, eluent: PE/EtOAc = 10/1) to afford the desired product **S3**.

To a suspension of LiAlH<sub>4</sub> (0.30 g, 8.0 mmol, 2.0 equiv) in Et<sub>2</sub>O (16 mL) was added a solution of **S3** (4.0 mmol, 1.0 equiv) in Et<sub>2</sub>O (2 mL) at 0 °C. The reaction mixture was stirred at room temperature for 4 h, then cooled to 0 °C, and water (0.3 mL), 15% NaOH (0.3 mL), water (0.9 mL) were added dropwise sequentially. The reaction mixture was stirred for 15 min., then filtered through Celite, and the filtrate was evaporated under reduced pressure. The residue was purified by flash chromatograph (SiO<sub>2</sub>, eluent: PE/EtOAc = 4/1) to afford the desired product **4**.

#### Synthesis of 4-phenylpent-4-en-1-ol (**4a**)

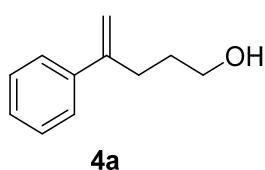

Prepared according to general procedure A. Colorless oil. The physical and spectroscopic data were in accordance with those reported in the literature.<sup>1</sup>

<sup>1</sup>H NMR (400 MHz, CHCl<sub>3</sub>) δ 7.34 (d, *J* = 7.6 Hz, 2H), 7.28–7.23 (m, 2H), 7.21–7.18 (m, 1H), 5.22 (s, 1H), 5.02 (s, 1H), 3.59 (t, *J* = 6.0 Hz, 2H), 2.53 (t, *J* = 7.7 Hz, 2H), 1.71–1.60 (m, 2H).

#### Synthesis of 4-(p-tolyl)pent-4-en-1-ol (**4b**)

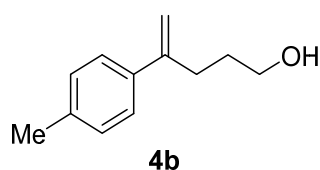

Prepared according to general procedure A. Colorless oil. The physical and spectroscopic data were in accordance with those reported in the literature.<sup>1</sup>

<sup>1</sup>H NMR (400 MHz, CHCl<sub>3</sub>) δ 7.42–7.26 (m, 2H), 7.15 (d, *J* = 7.9 Hz, 2H), 5.29 (s, 1H), 5.06 (s, 1H), 3.66 (t, *J* = 6.5 Hz, 2H), 2.71–2.55 (m, 2H), 2.36 (s, 3H), 1.85–1.60 (m, 2H).

#### Synthesis of 4-(4-methoxyphenyl)pent-4-en-1-ol (4c)

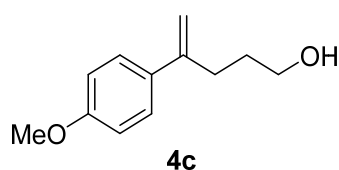

Prepared according to general procedure A. Colorless oil. The physical and spectroscopic data were in accordance with those reported in the literature.<sup>1</sup>

<sup>1</sup>H NMR (400 MHz, CHCl<sub>3</sub>) δ 7.36 (d, *J* = 7.9 Hz, 2H), 6.86 (d, *J* = 7.9 Hz, 2H), 5.23 (s, 1H), 5.01 (s, 1H), 3.81 (s, 3H), 3.72–3.57 (m, 2H), 2.58 (t, *J* = 7.5 Hz, 2H), 1.76–1.69 (m, 2H).

#### Synthesis of 4-(4-fluorophenyl)pent-4-en-1-ol (4d)

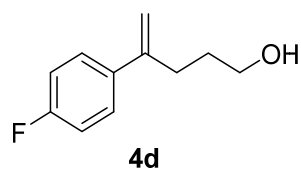

Prepared according to general procedure A. Colorless oil. The physical and spectroscopic data were in accordance with those reported in the literature.<sup>71</sup>

<sup>1</sup>H NMR (400 MHz, CHCl<sub>3</sub>) δ 7.49–7.31 (m, 2H), 7.03–6.98 (m, 2H), 5.24 (s, 1H), 5.08 (s, 1H), 3.66 (t, *J* = 6.5 Hz, 2H), 2.58 (t, *J* = 7.7 Hz, 2H), 1.82–1.57 (m, 2H).

#### Synthesis of 4-(4-chlorophenyl)pent-4-en-1-ol (4e)

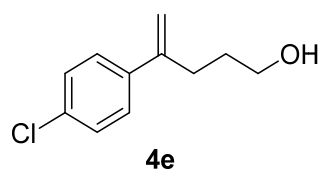

Prepared according to general procedure A. Colorless oil. The physical and spectroscopic data were in accordance with those reported in the literature.<sup>1</sup>

$^1\text{H NMR}$  (400 MHz,  $\text{CHCl}_3$ )  $\delta$  7.34 (d,  $J = 8.6$  Hz, 2H), 7.29 (d,  $J = 8.6$  Hz, 2H), 5.28 (s, 1H), 5.11 (d,  $J = 1.5$  Hz, 1H), 3.66 (t,  $J = 6.4$  Hz, 2H), 2.57 (t,  $J = 7.6$  Hz, 2H), 1.87–1.65 (m, 2H).

#### Synthesis of 4-(4-bromophenyl)pent-4-en-1-ol (4f)

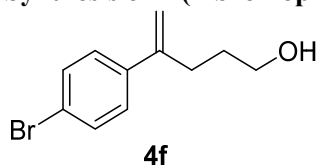

Prepared according to general procedure A. Colorless oil. The physical and spectroscopic data were in accordance with those reported in the literature.<sup>1</sup>

$^1\text{H NMR}$  (400 MHz,  $\text{CHCl}_3$ )  $\delta$  7.56–7.42 (m, 2H), 7.35–7.24 (m, 2H), 5.32 (s, 1H), 5.14 (s, 1H), 3.69 (t,  $J = 6.5$  Hz, 2H), 2.60 (t,  $J = 7.6$  Hz, 2H), 1.90–1.68 (m, 2H).

#### Synthesis of 4-([1,1'-biphenyl]-4-yl)pent-4-en-1-ol (4g)

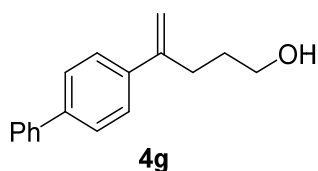

Prepared according to general procedure A. White solid.

**MP:** 89–90 °C

$^1\text{H NMR}$  (400 MHz,  $\text{CHCl}_3$ )  $\delta$  7.60 (d,  $J = 7.3$  Hz, 2H), 7.57 (d,  $J = 8.3$  Hz, 2H), 7.50 (d,  $J = 8.3$  Hz, 2H), 7.44 (t,  $J = 7.5$  Hz, 2H), 7.37–7.32 (m, 1H), 5.37 (s, 1H), 5.13 (s, 1H), 3.70 (t,  $J = 6.4$  Hz, 2H), 2.65 (t,  $J = 7.6$  Hz, 2H), 1.98–1.71 (m, 2H), 1.41 (s, 2H).

$^{13}\text{C NMR}$  (101 MHz,  $\text{CDCl}_3$ )  $\delta$  147.4, 140.7, 140.3, 139.8, 128.8, 127.3, 127.03, 126.97, 126.5, 112.6, 62.4, 31.5, 31.2.

**IR** (neat)  $\text{cm}^{-1}$   $\nu$ : 3304 (m), 1622 (w), 1486 (w), 1447 (w), 1405 (w), 1061 (m), 1052 (m), 1025 (m), 896 (w), 843 (s), 770 (m), 735 (s), 690 (s).

**HRMS** (APPI)  $m/z$ :  $[\text{M} + \text{H}]^+$  Calcd for  $\text{C}_{17}\text{H}_{19}\text{O}^+$  239.1430; Found 239.1436.

#### Synthesis of 4-(4-isopropylphenyl)pent-4-en-1-ol (4h)

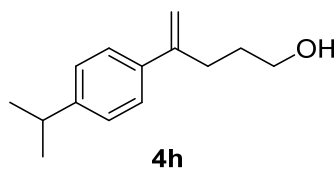

Prepared according to general procedure A. Colorless oil.

**<sup>1</sup>H NMR** (400 MHz, CHCl<sub>3</sub>)  $\delta$  7.35 (d,  $J$  = 8.3 Hz, 2H), 7.19 (d,  $J$  = 8.0 Hz, 2H), 5.29 (d,  $J$  = 1.5 Hz, 1H), 5.06 (d,  $J$  = 1.7 Hz, 1H), 3.67 (t,  $J$  = 6.5 Hz, 2H), 2.91 (hept,  $J$  = 7.0 Hz, 1H), 2.60 (t,  $J$  = 7.6 Hz, 2H), 1.83 – 1.68 (m, 2H), 1.41 (brs, 1H), 1.26 (d,  $J$  = 6.9 Hz, 6H).

**<sup>13</sup>C NMR** (101 MHz, CDCl<sub>3</sub>)  $\delta$  148.2, 147.7, 138.3, 126.3, 126.0, 111.8, 62.5, 33.7, 31.5, 31.2, 24.0

**IR** (neat) cm<sup>-1</sup>  $\nu$ : 3309 (m), 1625 (w), 1512 (w), 1460 (w), 1363 (w), 1056 (m), 1017 (w), 891 (m), 838 (s), 759 (w), 698 (w).

**HRMS** (APPI)  $m/z$ : [M + H]<sup>+</sup> Calcd for C<sub>14</sub>H<sub>21</sub>O<sup>+</sup> 205.1587; Found 205.1591.

#### Synthesis of 4-(*m*-tolyl)pent-4-en-1-ol (**4i**)

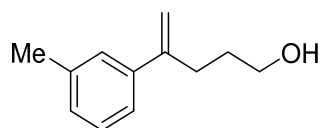

Prepared according to general procedure **B**. Colorless oil. The physical and spectroscopic data were in accordance with those reported in the literature.<sup>2</sup>

**<sup>1</sup>H NMR** (400 MHz, CHCl<sub>3</sub>)  $\delta$  7.25–7.17 (m, 3H), 7.15–7.03 (m, 1H), 5.28 (d,  $J$  = 1.4 Hz, 1H), 5.08 (d,  $J$  = 1.4 Hz, 1H), 3.67 (t,  $J$  = 6.5 Hz, 2H), 2.74–2.55 (m, 2H), 2.36 (s, 3H), 1.83–1.63 (m, 2H).

#### Synthesis of 4-(3-methoxyphenyl)pent-4-en-1-ol (**4j**)

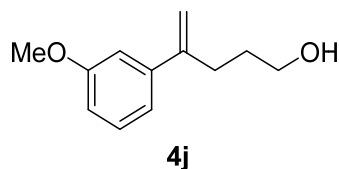

Prepared according to general procedure **B**. Colorless oil.

**<sup>1</sup>H NMR** (400 MHz, CHCl<sub>3</sub>)  $\delta$  7.27 (t,  $J$  = 7.9 Hz, 1H), 7.06–7.01 (m, 1H), 6.98 (s, 1H), 6.85 (dd,  $J$  = 8.2, 2.5 Hz, 1H), 5.32 (s, 1H), 5.12 (s, 1H), 3.84 (s, 3H), 3.68 (t,  $J$  = 6.5 Hz, 2H), 2.72–2.57 (m, 2H), 1.84–1.68 (m, 2H), 1.67 (brs, 1H, OH).

**<sup>13</sup>C NMR** (101 MHz, CDCl<sub>3</sub>)  $\delta$  159.7, 148.0, 142.7, 129.4, 118.8, 112.9, 112.7, 112.3, 62.5, 55.3, 31.7, 31.3.

**IR** (neat) cm<sup>-1</sup>  $\nu$ : 3335 (m), 1598 (w), 1576 (m), 1488 (w), 1430 (w), 1326 (w), 1286 (m), 1230 (m), 1169 (w), 1041 (s), 882 (m), 857 (m), 786 (s), 729 (m).

**HRMS** (APPI)  $m/z$ : [M]<sup>+</sup> Calcd for C<sub>12</sub>H<sub>16</sub>O<sub>2</sub><sup>+</sup> 192.1145; Found 192.1148.

#### Synthesis of 4-(3-chlorophenyl)pent-4-en-1-ol (**4k**)

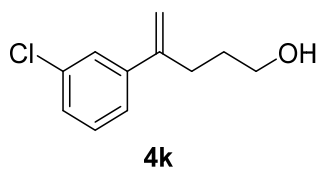

Prepared according to general procedure **B**. Colorless oil.

**<sup>1</sup>H NMR** (400 MHz, CHCl<sub>3</sub>)  $\delta$  7.26–7.09 (m, 4H), 5.24 (s, 1H), 5.06 (s, 1H), 3.60 (t,  $J$  = 6.4 Hz, 2H), 2.51 (td,  $J$  = 7.5, 1.3 Hz, 2H), 1.68–1.61 (m, 2H), 1.27 (brs, 1H).

**<sup>13</sup>C NMR** (101 MHz, CDCl<sub>3</sub>)  $\delta$  146.8, 143.0, 134.3, 129.7, 127.5, 126.4, 124.4, 113.8, 62.3, 31.5, 31.1.

**IR** (neat) cm<sup>-1</sup>  $\nu$ : 3309 (m), 2945 (w), 1593 (w), 1562 (w), 1476 (w), 1412 (w), 1096 (w), 1057 (m), 901 (m), 884 (m), 790 (s), 726 (m).

**HRMS** (ESI)  $m/z$ : [M–H<sub>2</sub>O+H]<sup>+</sup> Calcd for C<sub>11</sub>H<sub>12</sub>Cl<sup>+</sup> 179.0622; Found 179.0613.

#### Synthesis of 4-(3,5-dimethylphenyl)pent-4-en-1-ol (**4l**)

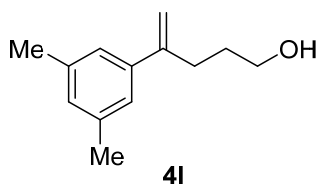

Prepared according to general procedure **B**. Colorless oil.

**<sup>1</sup>H NMR** (400 MHz, CHCl<sub>3</sub>)  $\delta$  7.03 (s, 2H), 6.93 (s, 1H), 5.26 (d,  $J$  = 1.6 Hz, 1H), 5.06 (d,  $J$  = 1.5 Hz, 1H), 3.67 (t,  $J$  = 6.5 Hz, 2H), 2.73–2.55 (m, 2H), 2.33 (s, 6H), 2.13 (brs, 1H, OH), 1.81–1.65 (m, 2H).

**<sup>13</sup>C NMR** (101 MHz, CDCl<sub>3</sub>)  $\delta$  148.3, 141.2, 137.8, 129.2, 124.1, 112.3, 62.6, 31.8, 31.3, 21.5.

**IR** (neat) cm<sup>-1</sup>  $\nu$ : 2960 (w), 1624 (w), 1513 (w), 1461 (w), 1295 (w), 1055 (m), 1017 (w), 893 (m), 838 (s), 674 (m).

**HRMS** (APPI)  $m/z$ : [M]<sup>+</sup> Calcd for C<sub>13</sub>H<sub>18</sub>O<sup>+</sup> 190.1352; Found 190.1356.

#### Synthesis of 4-(5-hydroxypent-1-en-2-yl)benzonitrile (**4m**)

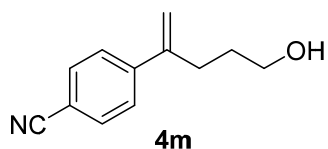

Prepared according to general procedure **B**. Colorless oil.

**<sup>1</sup>H NMR** (400 MHz, CDCl<sub>3</sub>) δ 7.57 (d, *J* = 8.0 Hz, 2H), 7.48 (d, *J* = 8.0 Hz, 2H), 5.37 (s, 1H), 5.22 (s, 1H), 3.63 (t, *J* = 6.4 Hz, 2H), 2.57 (t, *J* = 7.7 Hz, 2H), 2.15 (brs, 1H), 1.68 (p, *J* = 6.9 Hz, 2H).

**<sup>13</sup>C NMR** (101 MHz, CDCl<sub>3</sub>) δ 146.5, 145.7, 132.2, 126.8, 118.9, 115.4, 110.8, 62.0, 31.1, 31.0.

**IR** (neat) cm<sup>-1</sup> ν: 3344 (s), 2916 (s), 2203 (m), 1802 (w), 1585 (w), 1549 (m), 1484 (m), 1433 (m), 1148 (w), 1081 (w), 1010 (m), 970 (w), 970 (w), 886 (w), 825 (w), 737 (w).

**HRMS** (ESI) *m/z*: [M + H]<sup>+</sup> Calcd for C<sub>12</sub>H<sub>14</sub>NO<sup>+</sup> 188.1070; Found 188.1067

### Synthesis of 5-phenylhex-5-en-1-ol (4n)

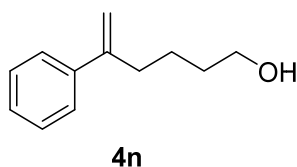

Prepared according to general procedure A. Colorless oil. The physical and spectroscopic data were in accordance with those reported in the literature.<sup>1</sup>

**<sup>1</sup>H NMR** (400 MHz, CHCl<sub>3</sub>) δ 7.32–7.26 (m, 1H), 7.24–7.18 (m, 2H), 7.18–7.12 (m, 2H), 5.17 (s, 1H), 4.96 (s, 1H), 3.48 (t, *J* = 6.4 Hz, 2H), 2.59–2.36 (m, 2H), 1.83 (brs, 1H, OH), 1.67–1.31 (m, 4H).

### Synthesis and characterization data of carboxylic acids 6

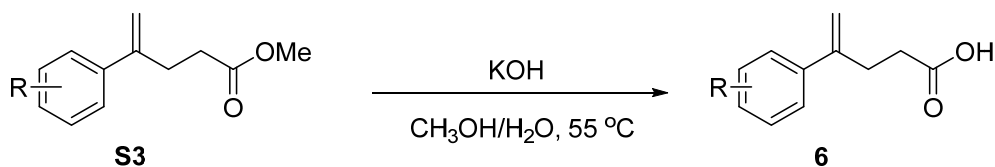

General procedure C:

To a solution of ester **S3** (3.5 mmol, 1.0 equiv) in water (6 mL) and methanol (3 mL) was added KOH (0.39 g, 7.0 mmol, 2 equiv). The reaction mixture was stirred at 55 °C for 6 h, then cooled to room temperature. Brine (50 mL) was added and the mixture was acidified to pH = 3 with 1 N HCl. The mixture was extracted with Et<sub>2</sub>O. The combined organic extracts were washed with brine, dried over Na<sub>2</sub>SO<sub>4</sub>. The solvent was evaporated under reduced pressure to give **6** as white solid, which can be used without further purification.

### Synthesis of 4-(4-chlorophenyl)pent-4-enoic acid (6a)

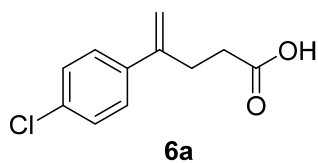

Prepared according to general procedure C. White solid. The physical and spectroscopic data were in accordance with those reported in the literature.<sup>3</sup>

<sup>1</sup>H NMR (400 MHz, CHCl<sub>3</sub>) δ 8.74 (s, 1H), 7.35–7.27 (m, 4H), 5.30 (s, 1H), 5.10 (s, 1H), 2.79 (t, *J* = 8.0 Hz, 2H), 2.49 (t, *J* = 8.0 Hz, 2H).

#### Synthesis of 4-(*p*-tolyl)pent-4-enoic acid (6b)

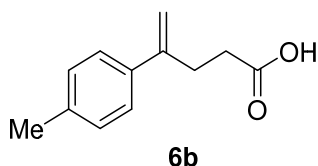

Prepared according to general procedure C. White solid. The physical and spectroscopic data were in accordance with those reported in the literature.<sup>3</sup>

<sup>1</sup>H NMR (400 MHz, CHCl<sub>3</sub>) δ 7.30 (d, *J* = 8.2 Hz, 2H), 7.15 (d, *J* = 8.0 Hz, 2H), 5.30 (s, 1H), 5.06 (s, 1H), 2.89–2.79 (m, 2H), 2.64–2.48 (m, 2H), 2.35 (s, 3H).

#### Synthesis of 4-(4-methoxyphenyl)pent-4-enoic acid (6c)

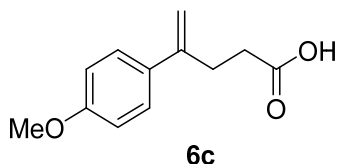

Prepared according to general procedure C. White solid. The physical and spectroscopic data were in accordance with those reported in the literature.<sup>3</sup>

<sup>1</sup>H NMR (400 MHz, CHCl<sub>3</sub>) δ 11.4 (brs, 1H, COOH), 7.35 (d, *J* = 8.7 Hz, 2H), 6.87 (d, *J* = 8.8 Hz, 2H), 5.25 (s, 1H), 5.02 (s, 1H), 3.81 (s, 3H), 2.82 (t, *J* = 8.1 Hz, 2H), 2.53 (t, *J* = 8.1 Hz, 2H).

#### Synthesis of 4-(4-fluorophenyl)pent-4-enoic acid (6d)

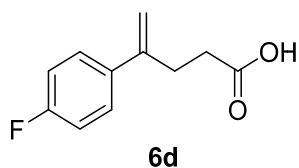

Prepared according to general procedure C. White solid. The physical and spectroscopic data were in accordance with those reported in the literature.<sup>3</sup>

<sup>1</sup>H NMR (400 MHz, CHCl<sub>3</sub>) δ 11.40 (brs, 1H, COOH), 7.44–7.30 (m, 2H), 7.05–7.00 (m, 2H), 5.27 (s, 1H), 5.09 (s, 1H), 2.82 (t, *J* = 8.0 Hz, 2H), 2.52 (t, *J* = 8.0 Hz, 2H).

#### Synthesis of 4-phenylpent-4-enoic acid (6e)

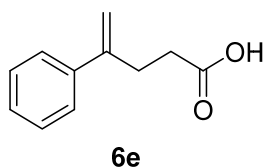

Prepared according to general procedure C. White solid. The physical and spectroscopic data were in accordance with those reported in the literature.<sup>3</sup>

<sup>1</sup>H NMR (400 MHz, CHCl<sub>3</sub>) δ 7.44–7.38 (m, 2H), 7.36–7.32 (m, 2H), 7.31–7.27 (m, 1H), 5.33 (d, *J* = 0.9 Hz, 1H), 5.11 (d, *J* = 1.3 Hz, 1H), 2.91–2.77 (m, 2H), 2.69–2.37 (m, 2H).

#### Synthesis of 4-(4-bromophenyl)pent-4-enoic acid (6f)

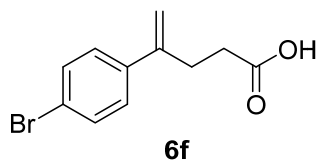

Prepared according to general procedure C. White solid. The physical and spectroscopic data were in accordance with those reported in the literature.<sup>4</sup>

<sup>1</sup>H NMR (400 MHz, CHCl<sub>3</sub>) δ 7.46 (d, *J* = 8.4 Hz, 2H), 7.27 (d, *J* = 8.4 Hz, 2H), 5.32 (s, 1H), 5.13 (d, *J* = 1.2 Hz, 1H), 2.86–2.77 (m, 2H), 2.60–2.48 (m, 2H).

#### Synthesis of 4-([1,1'-biphenyl]-4-yl)pent-4-enoic acid (6g)

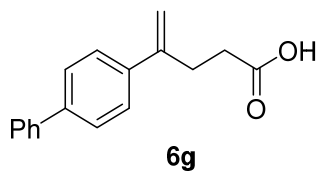

Prepared according to general procedure C. White solid. The physical and spectroscopic data were in accordance with those reported in the literature.<sup>3</sup>

<sup>1</sup>H NMR (400 MHz, CHCl<sub>3</sub>) δ 7.67–7.55 (m, 4H), 7.54–7.42 (m, 4H), 7.40–7.31 (m, 1H), 5.40 (s, 1H), 5.14 (s, 1H), 2.89 (t, *J* = 7.6 Hz, 2H), 2.58 (t, *J* = 7.6 Hz, 2H).



### Synthesis of 4-(4-isopropylphenyl)pent-4-enoic acid (6h)

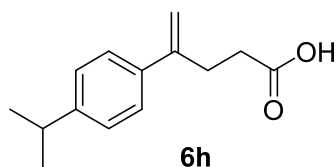

Prepared according to general procedure C. White solid.

**MP:** 52–53 °C

**<sup>1</sup>H NMR** (400 MHz, CHCl<sub>3</sub>) δ 11.60 (brs, 1H, COOH), 7.35 (d, *J* = 8.2 Hz, 2H), 7.20 (d, *J* = 8.2 Hz, 2H), 5.32 (s, 1H), 5.07 (s, 1H), 2.96–2.86 (m, 1H), 2.84 (t, *J* = 7.8 Hz, 2H), 2.55 (t, *J* = 7.8 Hz, 2H), 1.26 (d, *J* = 6.9 Hz, 6H).

**<sup>13</sup>C NMR** (101 MHz, CDCl<sub>3</sub>) δ 179.9, 148.6, 146.4, 137.9, 126.6, 126.1, 112.3, 33.9, 33.2, 30.2, 24.1

**IR** (neat) cm<sup>-1</sup> ν: 2959 (m), 1694 (s), 1625 (w), 1510 (w), 1441 (w), 1414 (w), 1333 (m), 1267 (w), 1222 (m), 1014 (w), 900 (m), 840 (s), 712 (w).

**HRMS** (ESI) *m/z*: [M + H]<sup>+</sup> Calcd for C<sub>14</sub>H<sub>19</sub>O<sub>2</sub><sup>+</sup> 219.1380; Found 219.1381.

### Synthesis of 4-(4-cyanophenyl)pent-4-enoic acid (6i)

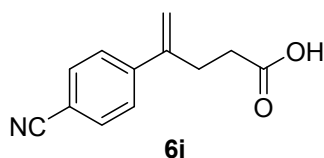

Prepared according to general procedure C. White solid. The physical and spectroscopic data were in accordance with those reported in the literature.<sup>5</sup>

**<sup>1</sup>H NMR** (400 MHz, CDCl<sub>3</sub>) δ 10.63 (s, 1H), 7.62 (d, *J* = 8.2 Hz, 2H), 7.49 (d, *J* = 8.2 Hz, 2H), 5.42 (s, 1H), 5.25 (s, 1H), 2.83 (t, *J* = 7.7 Hz, 2H), 2.53 (t, *J* = 7.7 Hz, 2H).

### Synthesis and characterization data of sulfonamides 8

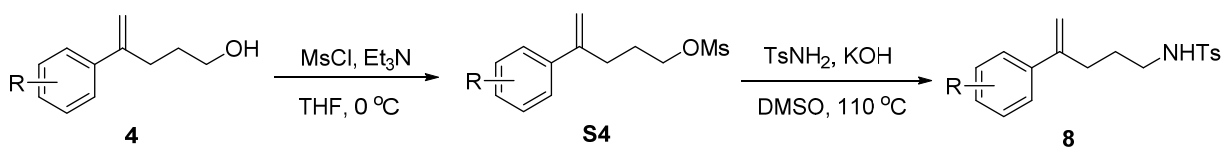

General procedure D:

To a solution of **4** (2.0 mmol, 1.0 equiv) and Et<sub>3</sub>N (0.43 mL, 3.0 mmol, 1.5 equiv) in THF (30 mL) was added MsCl (0.15 mL, 2.0 mmol, 1.0 equiv) at 0 °C. The reaction mixture was stirred at 0 °C for 30 minutes, then filtered, and the filter cake was washed with THF three times. The filtrate was evaporated under reduced pressure. The residue **S4** was used for the next reaction without further purification.

To a solution of **S4** obtained above in DMSO (8 mL) was added TsNH<sub>2</sub> (0.51 g, 3.0 mmol, 1.5 equiv). The reaction mixture was stirred at 110 °C for 4 h, then cooled to room temperature. Water was added. The mixture was extracted with Et<sub>2</sub>O (3 × 15 mL). The combined organic extracts were washed with brine, dried over Na<sub>2</sub>SO<sub>4</sub>. The volatiles were evaporated under reduced pressure. The residue was purified by flash chromatography (SiO<sub>2</sub>, eluent: PE/EtOAc = 5/1) to afford the desired **8**.

#### Synthesis of 4-methyl-N-(4-phenylpent-4-en-1-yl)benzenesulfonamide (**8a**)

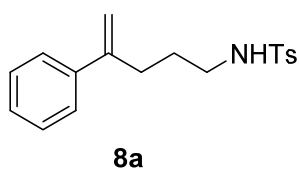

Prepared according to general procedure **D**. Pale yellow oil. The physical and spectroscopic data were in accordance with those reported in the literature.<sup>6</sup>

<sup>1</sup>H NMR (400 MHz, CHCl<sub>3</sub>) δ 7.63 (d, *J* = 8.1 Hz, 2H), 7.23 (d, *J* = 1.2 Hz, 2H), 7.22–7.14 (m, 5H), 5.17 (d, *J* = 1.4 Hz, 1H), 4.93 (d, *J* = 1.4 Hz, 1H), 4.36 (brs, 1H), 2.88 (q, *J* = 6.6 Hz, 2H), 2.50–2.37 (m, 2H), 2.35 (s, 3H), 1.56–1.48 (m, 2H).

#### Synthesis of 4-methyl-N-(4-(p-tolyl)pent-4-en-1-yl)benzenesulfonamide (**8b**)

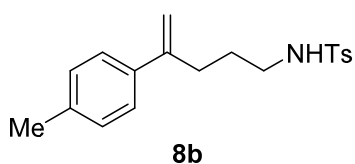

Prepared according to general procedure **D**. Pale yellow solid.

**MP**: 69–70 °C

<sup>1</sup>H NMR (400 MHz, CHCl<sub>3</sub>) δ 7.63 (d, *J* = 8.0 Hz, 2H), 7.18 (d, *J* = 8.0 Hz, 2H), 7.13 (d, *J* = 8.0 Hz, 2H), 7.02 (d, *J* = 8.0 Hz, 2H), 5.13 (s, 1H), 4.87 (s, 1H), 2.85 (q, *J* = 6.7 Hz, 2H), 2.39 (t, *J* = 7.5 Hz, 2H), 2.33 (s, 3H), 2.25 (s, 3H), 1.50 (p, *J* = 7.2 Hz, 2H).

<sup>13</sup>C NMR (101 MHz, CDCl<sub>3</sub>) δ 147.0, 143.4, 137.7, 137.4, 137.0, 129.8, 129.1, 127.2, 126.0, 112.4, 42.8, 32.3, 28.0, 21.6, 21.2.

**IR** (neat)  $\text{cm}^{-1}$   $\nu$ : 3255 (w), 1631 (w), 1512 (w), 1427 (w), 1323 (s), 1290 (w), 1158 (s), 1081 (m), 900 (m), 817 (s), 736 (w).

**HRMS** (ESI)  $m/z$ :  $[M + H]^+$  Calcd for  $\text{C}_{19}\text{H}_{24}\text{NO}_2\text{S}^+$  330.1522; Found 330.1525.

#### Synthesis of N-(4-(4-methoxyphenyl)pent-4-en-1-yl)-4-methylbenzenesulfonamide (8c)

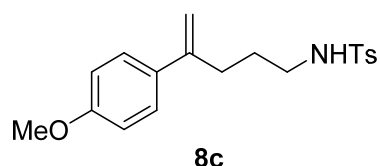

Prepared according to general procedure **D**. Pale yellow oil.

**$^1\text{H}$  NMR** (400 MHz,  $\text{CHCl}_3$ )  $\delta$  7.74 (d,  $J = 8.2$  Hz, 2H), 7.30–7.27 (m, 4H), 6.85 (d,  $J = 9.0$  Hz, 2H), 5.19 (s, 1H), 4.93 (s, 1H), 4.82 (t,  $J = 6.3$  Hz, 1H), 3.82 (s, 3H), 2.96 (q,  $J = 6.8$  Hz, 1H), 2.48 (t,  $J = 7.5$  Hz, 1H), 1.66–1.58 (m, 2H).

**$^{13}\text{C}$  NMR** (101 MHz,  $\text{CDCl}_3$ )  $\delta$  159.2, 146.4, 143.4, 137.0, 133.0, 129.8, 127.21, 127.15, 113.8, 111.6, 55.4, 42.8, 32.4, 28.0, 21.6.

**IR** (neat)  $\text{cm}^{-1}$   $\nu$ : 2921 (w), 1599 (w), 1492 (w), 1423 (w), 1323 (m), 1157 (s), 1094 (m), 899 (m), 814 (m), 794 (m), 727 (m).

**HRMS** (ESI)  $m/z$ :  $[M + H]^+$  Calcd for  $\text{C}_{19}\text{H}_{24}\text{NO}_3\text{S}^+$  346.1471; Found 346.1474.

#### Synthesis of N-(4-(4-fluorophenyl)pent-4-en-1-yl)-4-methylbenzenesulfonamide (8d)

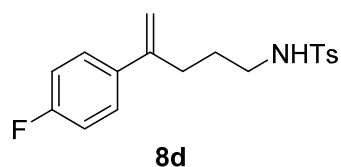

Prepared according to general procedure **D**. Pale yellow solid.

**MP**: 59–60 °C

**$^1\text{H}$  NMR** (400 MHz,  $\text{CHCl}_3$ )  $\delta$  7.74 (d,  $J = 8.3$  Hz, 2H), 7.47–7.21 (m, 4H), 7.00 (t,  $J = 8.7$  Hz, 2H), 5.21 (d,  $J = 1.2$  Hz, 1H), 5.00 (d,  $J = 1.4$  Hz, 1H), 4.72 (t,  $J = 6.3$  Hz, 1H), 2.96 (q,  $J = 6.6$  Hz, 2H), 2.53–2.46 (m, 2H), 2.44 (s, 3H), 1.74–1.50 (m, 2H).

**$^{13}\text{C}$  NMR** (101 MHz,  $\text{CHCl}_3$ )  $\delta$  162.3 (d,  $J = 246.4$  Hz), 146.1, 143.4, 136.9, 136.6 (d,  $J = 3.3$  Hz), 129.7, 127.6 (d,  $J = 7.8$  Hz), 127.0, 115.2 (d,  $J = 21.3$  Hz), 113.0 (d,  $J = 1.2$  Hz), 42.8, 32.5, 28.0, 21.6.

**IR** (neat)  $\text{cm}^{-1}$ : 3276 (m), 1599 (w), 1509 (s), 1431 (m), 1325 (s), 1230 (m), 1159 (s), 1062 (m), 909 (w), 897 (w), 845 (m), 845 (m), 816 (m), 677 (m).

**HRMS** (ESI)  $m/z$ :  $[M + H]^+$  Calcd for  $\text{C}_{18}\text{H}_{21}\text{FNO}_2\text{S}^+$  334.1272; Found 334.1273.

#### Synthesis of N-(4-(4-chlorophenyl)pent-4-en-1-yl)-4-methylbenzenesulfonamide (**8e**)

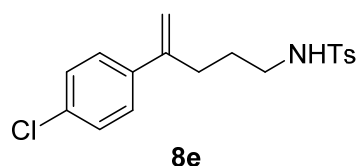

Prepared according to general procedure **D**. Pale yellow solid.

**MP**: 73–74 °C

**$^1\text{H}$  NMR** (400 MHz,  $\text{CHCl}_3$ )  $\delta$  7.73 (d,  $J = 8.3$  Hz, 2H), 7.37–7.24 (m, 6H), 5.25 (d,  $J = 1.1$  Hz, 1H), 5.03 (d,  $J = 1.3$  Hz, 1H), 2.96 (q,  $J = 6.6$  Hz, 2H), 2.52–2.45 (m, 2H), 2.44 (s, 3H), 1.67–1.49 (m, 2H).

**$^{13}\text{C}$  NMR** (101 MHz,  $\text{CDCl}_3$ )  $\delta$  146.1, 143.5, 139.1, 137.0, 133.4, 129.8, 128.6, 127.5, 127.2, 113.7, 42.8, 32.2, 28.0, 21.6.

**IR** (neat)  $\text{cm}^{-1}$ : 3266 (m), 2868 (w), 1739 (w), 1597 (w), 1491 (m), 1432 (w), 1318 (s), 1299 (m), 1155 (s), 1091 (m), 1060 (m), 1010 (m), 911 (m), 844 (m), 816 (m), 728 (s), 719 (s).

**HRMS** (ESI)  $m/z$ :  $[M + H]^+$  Calcd for  $\text{C}_{18}\text{H}_{21}\text{ClNO}_2\text{S}^+$  350.0976; Found 350.0979.

#### Synthesis of N-(4-(4-bromophenyl)pent-4-en-1-yl)-4-methylbenzenesulfonamide (**8f**)

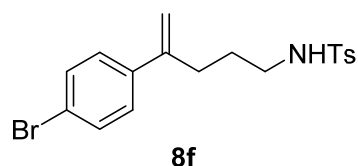

Prepared according to general procedure **D**. Pale yellow solid.

**MP**: 76–77 °C

**$^1\text{H}$  NMR** (400 MHz,  $\text{CHCl}_3$ )  $\delta$  7.62 (d,  $J = 8.1$  Hz, 2H), 7.35 (d,  $J = 8.1$  Hz, 2H), 7.21 (d,  $J = 8.0$  Hz, 2H), 7.11 (d,  $J = 8.1$  Hz, 2H), 5.17 (s, 1H), 4.96 (s, 1H), 4.32 (t,  $J = 6.2$  Hz, 1H), 2.88 (q,  $J = 6.8$  Hz, 2H), 2.40 (t,  $J = 7.6$  Hz, 2H), 2.36 (s, 3H), 1.50 (p,  $J = 7.2$  Hz, 2H).

**$^{13}\text{C}$  NMR** (101 MHz,  $\text{CDCl}_3$ )  $\delta$  146.1, 143.5, 139.6, 137.0, 131.6, 129.8, 127.8, 127.2, 121.6, 113.8, 42.7, 32.2, 28.0, 21.7.

**IR** (neat)  $\text{cm}^{-1}$   $\nu$ : 3250 (m), 2161 (w), 1597 (w), 1489 (w), 1435 (w), 1317 (s), 1154 (s), 1060 (m), 1005 (w), 906 (w), 839 (w), 816 (w), 719 (m).

**HRMS** (ESI)  $m/z$ :  $[M + H]^+$  Calcd for  $\text{C}_{18}\text{H}_{21}\text{BrNO}_2\text{S}^+$  394.0471; Found 394.0474.

### Synthesis of N-(4-([1,1'-biphenyl]-4-yl)pent-4-en-1-yl)-4-methylbenzenesulfonamide (**8g**)

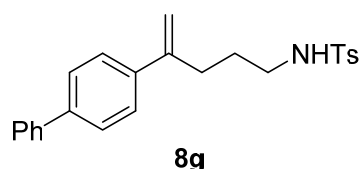

Prepared according to general procedure **D**. Pale yellow solid.

**MP**: 94–96 °C

**$^1\text{H}$  NMR** (400 MHz,  $\text{CHCl}_3$ )  $\delta$  7.76 (d,  $J = 8.4$  Hz, 2H), 7.63 (d,  $J = 7.2$  Hz, 2H), 7.57 (d,  $J = 8.2$  Hz, 2H), 7.51–7.35 (m, 5H), 7.32–7.27 (m, 2H), 5.35 (s, 1H), 5.07 (s, 1H), 4.75 (t,  $J = 6.5$  Hz, 1H), 3.01 (q,  $J = 6.7$  Hz, 2H), 2.57 (t,  $J = 7.5$  Hz, 2H), 2.42 (s, 3H), 1.67 (p,  $J = 7.1$  Hz, 2H).

**$^{13}\text{C}$  NMR** (101 MHz,  $\text{CDCl}_3$ )  $\delta$  146.7, 143.4, 140.7, 140.4, 139.5, 137.1, 129.8, 128.9, 127.4, 127.18, 127.15, 127.1, 126.6, 113.2, 42.8, 32.3, 28.1, 21.6.

**IR** (neat)  $\text{cm}^{-1}$   $\nu$ : 3299 (m), 1597 (w), 1489 (w), 1422 (w), 1324 (m), 1156 (s), 1093 (m), 1075 (m), 896 (m), 842 (m), 817 (m), 772 (m), 737 (s).

**HRMS** (ESI)  $m/z$ :  $[M + H]^+$  Calcd for  $\text{C}_{24}\text{H}_{26}\text{NO}_2\text{S}^+$  392.1679; Found 392.1684.

### Synthesis of N-(4-(4-isopropylphenyl)pent-4-en-1-yl)-4-methylbenzenesulfonamide (**8h**)

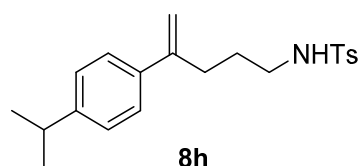

Prepared according to general procedure **D**. Pale yellow oil.

**$^1\text{H}$  NMR** (400 MHz,  $\text{CHCl}_3$ )  $\delta$  7.75 (d,  $J = 8.1$  Hz, 2H), 7.36–7.25 (m, 4H), 7.19 (d,  $J = 8.1$  Hz, 2H), 5.25 (d,  $J = 1.5$  Hz, 1H), 4.98 (d,  $J = 1.6$  Hz, 1H), 4.70 (t,  $J = 6.2$  Hz, 1H), 3.02–2.88 (m, 3H), 2.51 (t,  $J = 7.5$  Hz, 2H), 2.45 (s, 3H), 1.69–1.59 (m, 2H), 1.28 (d,  $J = 6.9$  Hz, 6H);

**$^{13}\text{C}$  NMR** (101 MHz,  $\text{CDCl}_3$ )  $\delta$  148.4, 146.9, 143.4, 138.0, 137.1, 129.8, 127.2, 126.5, 126.0, 112.4, 42.9, 33.9, 32.3, 28.1, 24.1, 21.6.

**IR** (neat)  $\text{cm}^{-1}$   $\nu$ : 3283 (m), 2162 (m), 1735 (w), 1459 (w), 1421 (w), 1325 (m), 1157 (s), 1094 (m), 901 (w), 840 (m), 813 (m), 719 (m), 662 (s).

**HRMS** (ESI)  $m/z$ :  $[M + H]^+$  Calcd for  $\text{C}_{21}\text{H}_{28}\text{NO}_2\text{S}^+$  358.1835; Found 358.1837.

#### Synthesis of 4-methyl-N-(4-(*m*-tolyl)pent-4-en-1-yl)benzenesulfonamide (**8i**)

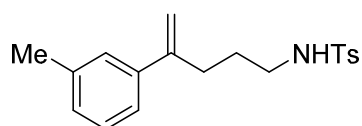

**8i**

Prepared according to general procedure **D**. Pale yellow oil.

**<sup>1</sup>H NMR** (400 MHz,  $\text{CHCl}_3$ )  $\delta$  7.72 (d,  $J = 8.2$  Hz, 1H), 7.33–7.26 (m, 3H), 7.26–7.07 (m, 4H), 5.25 (d,  $J = 1.4$  Hz, 1H), 5.01 (d,  $J = 1.6$  Hz, 1H), 4.30 (brs, 1H), 2.98 (q,  $J = 6.6$  Hz, 2H), 2.51 (t,  $J = 7.5$  Hz, 2H), 2.45 (s, 3H), 2.37 (s, 3H), 1.65–1.57 (m, 2H).

**<sup>13</sup>C NMR** (101 MHz,  $\text{CDCl}_3$ )  $\delta$  147.2, 143.2, 140.6, 137.7, 136.9, 129.6, 128.2, 127.0, 126.7, 123.1, 112.7, 42.6, 32.1, 27.8, 21.4.

**IR** (neat)  $\text{cm}^{-1}$   $\nu$ : 3267 (w), 1741 (w), 1599 (w), 1448 (w), 1427 (w), 1322 (m), 1304 (m), 1151 (s), 1096 (m), 1073 (m), 813 (s), 799 (m), 694 (m).

**HRMS** (ESI)  $m/z$ :  $[M + H]^+$  Calcd for  $\text{C}_{19}\text{H}_{24}\text{NO}_2\text{S}^+$  330.1522; Found 330.1524.

#### Synthesis of N-(4-(3-chlorophenyl)pent-4-en-1-yl)-4-methylbenzenesulfonamide (**8j**)

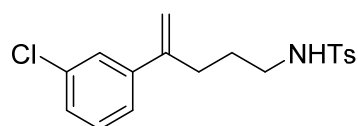

**8j**

Prepared according to general procedure **D**. Pale yellow oil.

**<sup>1</sup>H NMR** (400 MHz,  $\text{CHCl}_3$ )  $\delta$  7.75 (d,  $J = 8.1$  Hz, 2H), 7.31–7.29 (m, 3H), 7.26–7.17 (m, 3H), 5.26 (s, 1H), 5.12 (t,  $J = 6.3$  Hz, 1H), 5.05 (s, 1H), 2.95 (q,  $J = 6.8$  Hz, 2H), 2.47 (t,  $J = 7.6$  Hz, 2H), 2.43 (s, 3H), 1.59 (p,  $J = 7.2$  Hz, 2H).

**<sup>13</sup>C NMR** (101 MHz,  $\text{CDCl}_3$ )  $\delta$  146.0, 143.4, 142.6, 136.9, 134.3, 129.8, 129.7, 127.5, 127.1, 126.2, 124.3, 114.2, 42.6, 32.0, 27.8, 21.6.

**IR** (neat)  $\text{cm}^{-1}$   $\nu$ : 3276 (m), 1594 (w), 1562 (w), 1476 (w), 1414 (w), 1322 (m), 1156 (s), 1094 (m), 901 (w), 815 (m), 729 (m), 662 (s).

HRMS (ESI)  $m/z$ :  $[M + H]^+$  Calcd for  $C_{18}H_{21}ClNO_2S^+$  350.0976; Found 350.0980.

### Synthesis of N-(4-(4-cyanophenyl)pent-4-en-1-yl)-4-methylbenzenesulfonamide (8k)

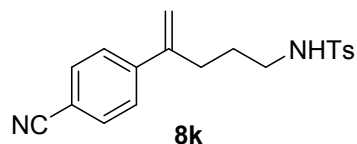

Prepared according to general procedure **D**. Pale yellow oil.

$^1\text{H NMR}$  (400 MHz,  $\text{CDCl}_3$ )  $\delta$  7.74 (d,  $J = 8.4$  Hz, 2H), 7.58 (d,  $J = 8.3$  Hz, 2H), 7.44 – 7.41 (m, 2H), 7.32 – 7.27 (m, 2H), 5.36 (s, 1H), 5.17 (s, 1H), 5.00 (t,  $J = 6.3$  Hz, 1H), 2.96 (q,  $J = 6.7$  Hz, 2H), 2.52 (t,  $J = 7.7$  Hz, 2H), 2.44 (s, 3H), 1.61 (p,  $J = 7.0$  Hz, 2H).

$^{13}\text{C NMR}$  (101 MHz,  $\text{CDCl}_3$ )  $\delta$  145.8, 145.4, 143.6, 136.9, 132.3, 129.8, 127.1, 126.8, 118.9, 116.0, 111.1, 42.6, 31.8, 28.0, 21.6.

HRMS (ESI)  $m/z$ :  $[M + \text{Na}]^+$  Calcd for  $C_{19}H_{20}N_2\text{NaO}_2\text{S}^+$  363.1138; Found 363.1135.

IR (neat)  $\text{cm}^{-1}$   $\nu$ : 3280 (m), 1732 (w), 1462 (w), 1420 (w), 1323 (m), 1158 (s), 1092 (m), 904 (w), 843 (m), 813 (m), 719 (m), 662 (s).

### General procedure for the copper-catalyzed three-component 1,2-alkoxy methylation of alkenes

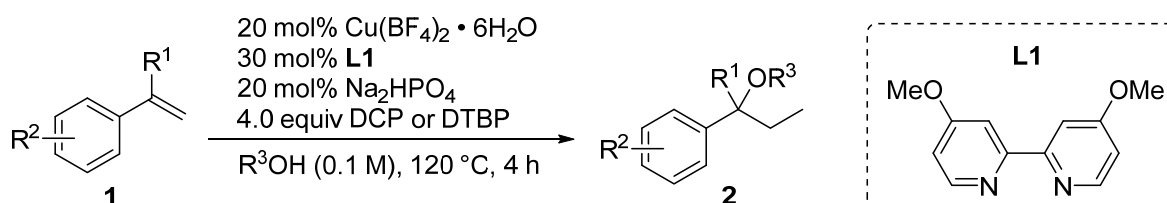

A screw cap tube was charged with  $\text{Cu}(\text{BF}_4)_2 \cdot 6\text{H}_2\text{O}$  (13.8 mg, 0.0400 mmol), 4,4'-dimethoxy-2,2'-bipyridyl **L1** (13.0 mg, 0.0601 mmol),  $\text{Na}_2\text{HPO}_4$  (5.7 mg, 0.0402 mmol) and  $R^3\text{OH}$  (2.0 mL). The mixture was stirred at room temperature for 30 minutes, then substrate **1** (0.2 mmol, 1.0 equiv) and DCP (216.2 mg, 0.800 mmol) or DTBP (0.15 mL, 4.0 equiv) were added to the above mixture. After being stirred for 4 hours at  $120^\circ\text{C}$  under  $\text{N}_2$  atmosphere, the reaction mixture was quenched with water, extracted with EtOAc. The organic extracts were washed with brine, dried over  $\text{Na}_2\text{SO}_4$ . The solvent was removed under reduced pressure. The residue was purified by flash chromatography to give **2**.

### Characterization of compounds **2**

### (2-methoxybutan-2-yl)benzene (2a)

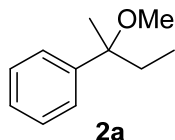

According to the general procedure for the copper-catalyzed three-component 1,2-alkoxy methylation of alkenes. The crude product was purified by flash column chromatography on silica gel (PE/CH<sub>2</sub>Cl<sub>2</sub> = 6/1, PE/EtOAc = 40/1, 8/1) to afford **2a** (31.0 mg, 96% yield) as a colorless oil.

<sup>1</sup>H NMR (400 MHz, CDCl<sub>3</sub>) δ 7.34–7.22 (m, 4H), 7.21–7.09 (m, 1H), 3.01 (s, 3H), 1.72 (q, *J* = 7.4 Hz, 2H), 1.44 (s, 3H), 0.70 (t, *J* = 7.4 Hz, 3H).

<sup>13</sup>C NMR (101 MHz, CDCl<sub>3</sub>) δ 145.2, 128.2, 126.8, 126.4, 79.5, 50.4, 35.2, 22.6, 8.5.

IR (neat) cm<sup>-1</sup> ν: 3060 (w), 2973 (w), 2935 (w), 2880 (w), 2824 (w), 1447 (w), 1372 (w), 1169 (w), 1073 (s), 760 (m), 700 (s).

HRMS (ESI) calcd for C<sub>11</sub>H<sub>17</sub>O<sup>+</sup> [M+H]<sup>+</sup> 165.1274; found 165.1270.

### 1-(2-methoxybutan-2-yl)-4-methylbenzene (2b)

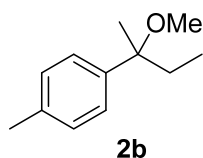

According to the general procedure for the copper-catalyzed three-component 1,2-alkoxy methylation of alkenes. The crude product was purified by flash column chromatography on silica gel (PE/CH<sub>2</sub>Cl<sub>2</sub> = 10/1, PE/EtOAc = 50/1) to afford **2b** (32.5 mg, 91% yield) as a colorless oil.

<sup>1</sup>H NMR (400 MHz, CDCl<sub>3</sub>) δ 7.18 (d, *J* = 7.6 Hz, 2H), 7.08 (d, *J* = 7.6 Hz, 2H), 2.99 (s, 3H), 2.27 (s, 3H), 1.71 (q, *J* = 7.4 Hz, 2H), 1.41 (s, 3H), 0.70 (t, *J* = 7.4 Hz, 3H).

<sup>13</sup>C NMR (101 MHz, CDCl<sub>3</sub>) δ 142.1, 136.3, 128.9, 126.4, 79.4, 50.4, 35.1, 22.6, 21.1, 8.5.

IR (neat) cm<sup>-1</sup> ν: 2972 (w), 2933 (w), 2880 (w), 2824 (w), 1510 (w), 1462 (w), 1370 (w), 1169 (w), 1078 (s), 1020 (w), 857 (w), 814 (s).

HRMS (ESI) calcd for C<sub>12</sub>H<sub>19</sub>O<sup>+</sup> [M+H]<sup>+</sup> 179.1430; found 179.1423.

### 1-methoxy-4-(2-methoxybutan-2-yl)benzene (2c)



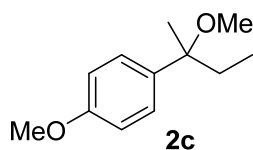

According to the general procedure for the copper-catalyzed three-component 1,2-alkoxy methylation of alkenes. The crude product was purified by flash column chromatography on silica gel (PE/EtOAc = 50/1) and then by PTLC (PE/EtOAc = 20/1, developed twice) to afford **2c** (30.0 mg, 77% yield) as a colorless oil.

**<sup>1</sup>H NMR** (400 MHz, CDCl<sub>3</sub>) δ 7.24–7.17 (m, 2H), 6.84–6.77 (m, 2H), 3.74 (s, 3H), 2.98 (s, 3H), 1.70 (q, *J* = 7.5 Hz, 2H), 1.41 (s, 3H), 0.69 (t, *J* = 7.5 Hz, 3H).

**<sup>13</sup>C NMR** (101 MHz, CDCl<sub>3</sub>) δ 158.4, 137.1, 127.6, 113.4, 79.2, 55.3, 50.3, 35.2, 22.5, 8.6.

**IR** (neat) cm<sup>-1</sup> ν: 2971 (w), 2935 (w), 2834 (w), 1611 (w), 1509 (s), 1463 (w), 1371 (w), 1301 (m), 1249 (s), 1178 (s), 1077 (s), 1034 (s), 828 (s).

**HRMS (ESI)** calcd for C<sub>12</sub>H<sub>19</sub>O<sub>2</sub><sup>+</sup> [M+H]<sup>+</sup> 195.1380; found 195.1385.

#### 1-fluoro-4-(2-methoxybutan-2-yl)benzene (**2d**)

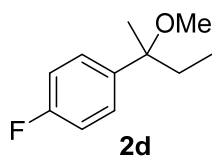

According to the general procedure for the copper-catalyzed three-component 1,2-alkoxy methylation of alkenes. The crude product was purified by flash column chromatography on silica gel (PE/CH<sub>2</sub>Cl<sub>2</sub> = 10/1, PE/EtOAc = 50/1) and then by PTLC (PE/EtOAc = 20/1, developed twice) to afford **2d** (29.8 mg, 80% yield) as a colorless oil.

**<sup>1</sup>H NMR** (400 MHz, CDCl<sub>3</sub>) δ 7.28–7.22 (m, 2H), 6.99–6.90 (m, 2H), 2.99 (s, 3H), 1.70 (q, *J* = 7.4 Hz, 2H), 1.42 (s, 3H), 0.68 (t, *J* = 7.4 Hz, 3H).

**<sup>13</sup>C NMR** (100 MHz, CDCl<sub>3</sub>) δ 161.8 (d, *J* = 244.7 Hz), 140.9 (d, *J* = 3.0 Hz), 128.1 (d, *J* = 7.9 Hz), 114.9 (d, *J* = 21.0 Hz), 79.2, 50.3, 35.2, 22.6, 8.4.

**IR** (neat) cm<sup>-1</sup> ν: 2975 (w), 2937 (w), 2881 (w), 2826 (w), 1603 (w), 1506 (s), 1463 (w), 1372 (w), 1300 (w), 1225 (s), 1161 (m), 1077 (s), 832 (s), 814 (m).

**HRMS (ESI)** calcd for C<sub>11</sub>H<sub>16</sub>FO<sup>+</sup> [M+H]<sup>+</sup> 183.1180; found 183.1175.

#### 4-(2-methoxybutan-2-yl)-1,1'-biphenyl (**2e**)

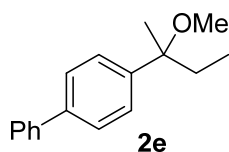

According to the general procedure for the copper-catalyzed three-component 1,2-alkoxy methylation of alkenes. The crude product was purified by flash column chromatography on silica gel (PE/CH<sub>2</sub>Cl<sub>2</sub> = 10/1, PE/EtOAc = 50/1) and then by PTLC (PE/DCM = 6/1) to afford **2e** (38.5 mg, 80% yield) as a colorless oil.

**<sup>1</sup>H NMR** (400 MHz, CDCl<sub>3</sub>) δ 7.66–7.53 (m, 4H), 7.48–7.41 (m, 4H), 7.38–7.31 (m, 1H), 3.13 (s, 3H), 1.84 (q, *J* = 7.4 Hz, 2H), 1.55 (s, 3H), 0.82 (t, *J* = 7.4 Hz, 3H).

**<sup>13</sup>C NMR** (101 MHz, CDCl<sub>3</sub>) δ 144.3, 141.0, 139.6, 128.9, 127.3, 127.2, 126.9, 79.4, 76.8, 50.5, 35.1, 29.9, 22.7, 8.5.

**IR** (neat) cm<sup>-1</sup> ν: 2980 (w), 2931 (w), 1603 (w), 1506 (s), 1495 (w), 1440 (w), 1225 (s), 1152 (m), 1075 (s), 762 (m), 624 (s);

**HRMS** (ESI) calcd for C<sub>17</sub>H<sub>21</sub>O<sup>+</sup> [M+H]<sup>+</sup> 241.1587; found 241.1590.

#### 1-(2-methoxybutan-2-yl)-3-methylbenzene (**2e**)

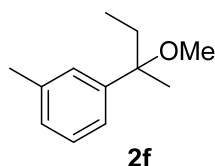

According to the general procedure for the copper-catalyzed three-component 1,2-alkoxy methylation of alkenes. The crude product was purified by flash column chromatography on silica gel (PE/CH<sub>2</sub>Cl<sub>2</sub> = 3/1) to afford **2e** (27.6 mg, 78% yield) as a colorless oil.

**<sup>1</sup>H NMR** (400 MHz, CDCl<sub>3</sub>) δ 7.31 – 7.23 (m, 1H), 7.23 – 7.15 (m, 2H), 7.09 (d, *J* = 7.4 Hz, 1H), 3.11 (s, 3H), 2.40 (s, 3H), 1.82 (q, *J* = 7.4 Hz, 2H), 1.53 (s, 3H), 0.81 (t, *J* = 7.4 Hz, 3H).

**<sup>13</sup>C NMR** (101 MHz, CDCl<sub>3</sub>) δ 145.2, 137.6, 128.0, 127.5, 127.1, 123.5, 79.4, 50.4, 35.1, 22.6, 21.8, 8.5.

**IR** (neat) cm<sup>-1</sup> ν: 2974 (w), 2934 (w), 2024 (w), 1459 (w), 1373 (w), 1299 (w), 1168 (m), 1082 (s), 1039 (w), 872 (w), 820 (w), 785 (s), 708 (s).

**HRMS** (ESI) *m/z*: [M–OCH<sub>3</sub>]<sup>+</sup> Calcd for C<sub>11</sub>H<sub>15</sub><sup>+</sup> 147.1168; Found 147.1169.

#### 1-chloro-3-(2-methoxybutan-2-yl)benzene (**2g**)

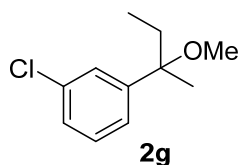

According to the general procedure for the copper-catalyzed three-component 1,2-alkoxy methylation of alkenes. The crude product was purified by flash column chromatography on silica gel (PE/CH<sub>2</sub>Cl<sub>2</sub> = 3/1) to afford **2g** (32.5 mg, 83% yield) as a colorless oil.

**<sup>1</sup>H NMR** (400 MHz, CDCl<sub>3</sub>) δ 7.38 (s, 1H), 7.32–7.21 (m, 3H), 3.11 (s, 3H), 1.79 (q, *J* = 7.4 Hz, 2H), 1.51 (s, 3H), 0.79 (t, *J* = 7.5 Hz, 3H).

**<sup>13</sup>C NMR** (101 MHz, CDCl<sub>3</sub>) δ 147.7, 134.3, 129.5, 127.0, 126.7, 124.6, 79.3, 50.5, 35.0, 22.6, 8.4.

**IR** (neat) cm<sup>-1</sup> ν: 2936 (w), 1734 (w), 1570 (w), 1466 (w), 1410 (w), 1372 (w), 1296 (w), 1229 (w), 1170 (w), 1076 (s), 1034 (w), 869 (m), 786 (s), 752 (m).

**HRMS** (ESI) *m/z*: [M–OCH<sub>3</sub>]<sup>+</sup> Calcd for C<sub>10</sub>H<sub>12</sub>Cl<sup>+</sup> 167.0622; Found 167.0625.

#### 4-(2-methoxybutan-2-yl)-1,2-dimethylbenzene (**2h**)

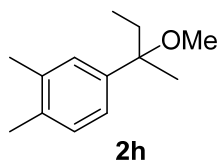

According to the general procedure for the copper-catalyzed three-component 1,2-alkoxy methylation of alkenes. The crude product was purified by flash column chromatography on silica gel (PE/CH<sub>2</sub>Cl<sub>2</sub> = 3/1) to afford **2h** (32.3 mg, 85% yield) as a colorless oil.

**<sup>1</sup>H NMR** (400 MHz, CDCl<sub>3</sub>) δ 7.12–7.08 (m, 3H), 3.09 (s, 3H), 2.29 (s, 3H), 2.27 (s, 3H), 1.80 (q, *J* = 7.4 Hz, 2H), 1.50 (s, 3H), 0.80 (t, *J* = 7.4 Hz, 3H).

**<sup>13</sup>C NMR** (101 MHz, CDCl<sub>3</sub>) δ 142.6, 136.2, 134.9, 129.4, 127.7, 123.9, 79.3, 50.4, 35.0, 22.6, 20.2, 19.5, 8.5.

**IR** (neat) cm<sup>-1</sup> ν: 2970 (w), 1743 (w), 1504 (w), 1452 (w), 1371 (w), 1168 (w), 1126 (w), 1080 (s), 997 (w), 821 (m), 723 (w).

**HRMS** (ESI) *m/z*: [M + Na]<sup>+</sup> Calcd for C<sub>13</sub>H<sub>20</sub>NaO<sup>+</sup> 215.1406; Found 215.1407.

#### 1-(2-methoxybutan-2-yl)-2-methylbenzene (**2i**)

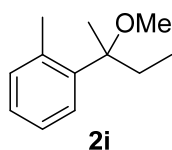

According to the general procedure for the copper-catalyzed three-component 1,2-alkoxy methylation of alkenes. The crude product was purified by flash column chromatography on silica gel (PE/CH<sub>2</sub>Cl<sub>2</sub> = 3/1) to afford **2i** (24.5 mg, 83% yield) as a colorless oil.

<sup>1</sup>H NMR (400 MHz, CDCl<sub>3</sub>) δ 7.24–7.18 (m, 1H), 7.17–7.12 (m, 3H), 3.04 (s, 3H), 2.54 (s, 3H), 2.02 – 1.82 (m, *J* = 7.2 Hz, 2H), 1.58 (s, 3H), 0.79 (t, *J* = 7.4 Hz, 3H).

<sup>13</sup>C NMR (101 MHz, CDCl<sub>3</sub>) δ 141.8, 137.1, 132.6, 128.2, 127.1, 125.5, 81.4, 50.2, 32.8, 23.2, 21.6, 8.8.

IR (neat) cm<sup>-1</sup> ν: 2972 (m), 1738 (w), 1457 (w), 1371 (w), 1221 (w), 1147 (w), 1112 (w), 1083 (m), 865 (w), 758 (s), 728 (s), 668 (w).

HRMS (ESI) *m/z*: [M-OCH<sub>3</sub>]<sup>+</sup> Calcd for C<sub>11</sub>H<sub>15</sub><sup>+</sup> 147.1174; Found 147.1168.

**(3-methoxypentan-3-yl)benzene (2j)**

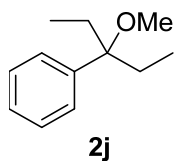

According to the general procedure for the copper-catalyzed three-component 1,2-alkoxy methylation of alkenes. The crude product was purified by flash column chromatography on silica gel (PE/CH<sub>2</sub>Cl<sub>2</sub> = 8/1, PE/EtOAc = 50/1) to afford **2j** (30.1 mg, 84% yield) as a colorless oil.

<sup>1</sup>H NMR (400 MHz, CDCl<sub>3</sub>) δ 7.33–7.21 (m, 4H), 7.20–7.11 (m, 1H), 2.99 (s, 3H), 1.85–1.70 (m, 4H), 0.64 (t, *J* = 7.4 Hz, 6H).

<sup>13</sup>C NMR (101 MHz, CDCl<sub>3</sub>) δ 144.4, 128.0, 126.8, 126.6, 81.6, 49.6, 28.3, 7.6.

IR (neat) cm<sup>-1</sup> ν: 3060 (w), 3024 (w), 2969 (w), 2936 (w), 2879 (w), 2825 (w), 1447 (w), 1075 (m), 941 (w), 892 (w), 757 (s), 700 (s).

HRMS (ESI) calcd for C<sub>12</sub>H<sub>19</sub>O<sup>+</sup> [M+H]<sup>+</sup> 179.1430; found 179,1433.

**(3-methoxy-2-methylpentan-3-yl)benzene (2k)**

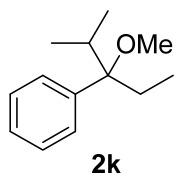

According to the general procedure for the copper-catalyzed three-component 1,2-alkoxy methylation of alkenes. The crude product was purified by flash column chromatography on silica gel (PE/CH<sub>2</sub>Cl<sub>2</sub> = 10/1, PE/EtOAc = 50/1) to afford **2k** (26.5 mg, 69% yield) as a colorless oil.

<sup>1</sup>H NMR (400 MHz, CDCl<sub>3</sub>) δ 7.28–7.07 (m, 5H), 3.07 (s, 3H), 2.16–1.98 (m, 2H), 1.94–1.80 (m, 1H), 0.83 (t, *J* = 7.0 Hz, 3H), 0.72–0.57 (m, 6H).

<sup>13</sup>C NMR (101 MHz, CDCl<sub>3</sub>) δ 140.7, 128.0 (2C), 127.2 (2C), 126.3, 83.7, 49.7, 33.3, 24.3, 18.0, 16.9, 7.1.

IR (neat) cm<sup>-1</sup> ν: 2965 (w), 2938 (w), 2879 (w), 2826 (w), 1446 (w), 1383 (w), 1348 (w), 1144 (w), 1102 (m), 1074 (m), 1059 (m), 941 (w), 895 (w), 758 (s), 704 (s).

HRMS (ESI) calcd for C<sub>13</sub>H<sub>21</sub>O<sup>+</sup> [M+H]<sup>+</sup> 193.1587; found 193.1598.

### (3-methoxypentane-1,3-diyl)dibenzene (**2l**)

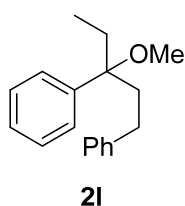

According to the general procedure for the copper-catalyzed three-component 1,2-alkoxy methylation of alkenes. The crude product was purified by flash column chromatography on silica gel (PE/CH<sub>2</sub>Cl<sub>2</sub> = 3/1) to afford **2l** (43.4 mg, 85% yield) as a colorless oil.

<sup>1</sup>H NMR (400 MHz, CDCl<sub>3</sub>) δ 7.49 (d, *J* = 7.8 Hz, 2H), 7.42 (t, *J* = 7.9 Hz, 2H), 7.32 (t, *J* = 7.1 Hz, 3H), 7.25–7.15 (m, 3H), 3.23 (s, 3H), 2.59–2.41 (m, 2H), 2.31–2.23 (m, 1H), 2.18–2.10 (m, 1H), 2.06–1.89 (m, 2H), 0.80 (t, *J* = 7.2 Hz, 3H).

<sup>13</sup>C NMR (101 MHz, CDCl<sub>3</sub>) δ 144.1, 142.8, 128.5, 128.4, 128.1, 126.7, 126.6, 125.8, 81.2, 49.5, 37.8, 29.7, 29.4, 7.7.

IR (neat) cm<sup>-1</sup> ν: 2938 (w), 1602 (w), 1494 (w), 1452 (w), 1334 (w), 1190 (w), 1074 (m), 1032 (w), 910 (w), 887 (w), 758 (m), 700 (s).

HRMS (ESI) *m/z*: [M + Na]<sup>+</sup> Calcd for C<sub>18</sub>H<sub>22</sub>NaO<sup>+</sup> 277.1563; Found 277.1565.

### (1-methoxypropane-1,1-diyl)dibenzene (**2m**)

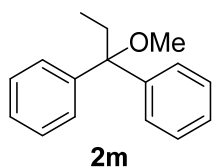

According to the general procedure for the copper-catalyzed three-component 1,2-alkoxy methylation of alkenes. The crude product was purified by flash column chromatography on silica gel (PE/CH<sub>2</sub>Cl<sub>2</sub> = 4/1) to afford **2m** (41.7 mg, 92% yield) as a white solid (DTBP was used as methyl source).

MP: 61–62 °C

<sup>1</sup>H NMR (400 MHz, CDCl<sub>3</sub>) δ 7.42 (d, *J* = 8.0 Hz, 4H), 7.37–7.30 (m, 4H), 7.29–7.16 (m, 2H), 3.11 (s, 3H), 2.40 (q, *J* = 7.2 Hz, 2H), 0.79 (t, *J* = 7.2 Hz, 3H).

<sup>13</sup>C NMR (101 MHz, CDCl<sub>3</sub>) δ 145.6, 127.9, 127.2, 126.6, 82.7, 50.0, 27.7, 7.4.

IR (neat) cm<sup>-1</sup> ν: 2942 (w), 1488 (w), 1447 (w), 1194 (w), 1175 (w), 1128 (w), 1068 (m), 1056 (w), 935 (w), 905 (w), 751 (w), 746 (m), 694 (s).

HRMS (ESI) *m/z*: [M-OCH<sub>3</sub>]<sup>+</sup> Calcd for C<sub>15</sub>H<sub>15</sub><sup>+</sup> 195.1168; Found 195.1169.

### 4,4'-(1-methoxypropane-1,1-diyl)bis(methylbenzene) (**2n**)

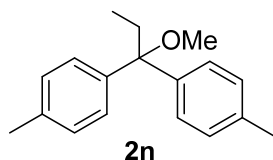

According to the general procedure for the copper-catalyzed three-component 1,2-alkoxy methylation of alkenes. The crude product was purified by flash column chromatography on silica gel (PE/CH<sub>2</sub>Cl<sub>2</sub> = 4/1) to afford **2n** (44.1 mg, 87% yield) as a colorless oil (DTBP was used as methyl source).

<sup>1</sup>H NMR (400 MHz, CDCl<sub>3</sub>) δ 7.27 (d, *J* = 7.8 Hz, 4H), 7.12 (d, *J* = 7.8 Hz, 4H), 3.08 (s, 3H), 2.41–2.26 (q, *J* = 7.2 Hz, 2H) 2.35 (s, 6H), 0.76 (t, *J* = 7.2 Hz, 3H).

<sup>13</sup>C NMR (101 MHz, CDCl<sub>3</sub>) δ 142.8, 136.0, 128.6, 127.1, 82.6, 49.9, 27.8, 21.1, 7.4.

IR (neat) cm<sup>-1</sup> ν: 2936 (w), 1511 (w), 1450 (w), 1182 (w), 1107 (m), 1068 (s), 1022 (w), 924 (w), 812 (s), 729 (m).

HRMS (ESI) *m/z*: [M-OCH<sub>3</sub>]<sup>+</sup> Calcd for C<sub>17</sub>H<sub>19</sub><sup>+</sup> 223.1492; Found 223.1487.

### 1-(1-methoxy-1-phenylpropyl)-3-methylbenzene (**2o**)

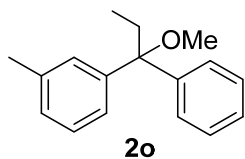

According to the general procedure for the copper-catalyzed three-component 1,2-alkoxy methylation of alkenes. The crude product was purified by flash column chromatography on silica gel (PE/CH<sub>2</sub>Cl<sub>2</sub> = 4/1) to afford **2o** (39.8 mg, 83% yield) as a colorless oil (DTBP was used as methyl source).

**<sup>1</sup>H NMR** (400 MHz, CDCl<sub>3</sub>) δ 7.42 (d, *J* = 7.8 Hz, 2H), 7.38–7.31 (m, 2H), 7.30–7.16 (m, 4H), 7.07 (d, *J* = 6.8 Hz, 2H), 3.11 (s, 3H), 2.41–2.35 (q, *J* = 7.4 Hz, 2H), 2.38 (s, 3H), 0.78 (t, *J* = 7.2 Hz, 3H).

**<sup>13</sup>C NMR** (101 MHz, CDCl<sub>3</sub>) δ 145.7, 145.5, 137.4, 127.9, 127.8, 127.4, 127.1, 126.6, 124.3, 82.7, 50.0, 27.7, 21.79, 7.4.

**IR** (neat) cm<sup>-1</sup> ν: 2972 (w), 1604 (w), 1448 (w), 1288 (w), 1172 (w), 1122 (w), 1068 (m), 910 (w), 789 (m), 756 (m), 702 (s).

**HRMS** (APPI) *m/z*: [M-OCH<sub>3</sub>]<sup>+</sup> Calcd for C<sub>16</sub>H<sub>17</sub><sup>+</sup> 209.1325; Found 209.1334.

#### 1-chloro-4-(1-methoxy-1-phenylpropyl)benzene (**2p**)

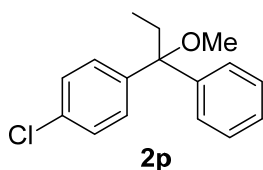

According to the general procedure for the copper-catalyzed three-component 1,2-alkoxy methylation of alkenes. The crude product was purified by flash column chromatography on silica gel (PE/CH<sub>2</sub>Cl<sub>2</sub> = 4/1) to afford **2p** (47.5 mg, 91% yield) as a colorless oil (DTBP was used as methyl source).

**<sup>1</sup>H NMR** (400 MHz, CDCl<sub>3</sub>) δ 7.97–6.87 (m, 9H), 3.06 (s, 3H), 2.47–2.21 (m, 2H), 0.74 (t, *J* = 7.2 Hz, 3H).

**<sup>13</sup>C NMR** (101 MHz, CDCl<sub>3</sub>) δ 145.0, 144.4, 132.4, 128.5, 128.08, 128.06, 127.1, 126.9, 82.4, 50.0, 27.6, 7.2.

**IR** (neat) cm<sup>-1</sup> ν: 2940 (w), 1741 (w), 1598 (w), 1490 (m), 1448 (m), 1377 (w), 1197 (m), 1107 (m), 1068 (s), 1014 (m), 927 (w), 823 (s), 762 (s).

**HRMS** (ESI) *m/z*: [M-OCH<sub>3</sub>]<sup>+</sup> Calcd for C<sub>15</sub>H<sub>14</sub>Cl<sup>+</sup> 229.0786; Found 229.0784.

#### 4,4'-(1-methoxypropane-1,1-diyl)bis(fluorobenzene) (**2q**)

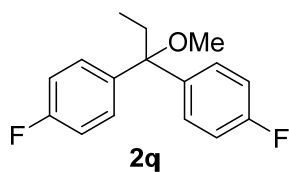

According to the general procedure for the copper-catalyzed three-component 1,2-alkoxy methylation of alkenes. The crude product was purified by flash column chromatography on silica gel (PE/CH<sub>2</sub>Cl<sub>2</sub> = 4/1) to afford **2q** (42.3 mg, 81% yield) as a colorless oil (DTBP was used as methyl source).

**<sup>1</sup>H NMR** (400 MHz, CDCl<sub>3</sub>)  $\delta$  7.65–7.21 (m, 4H), 7.10–6.87 (m, 4H), 3.05 (s, 3H), 2.31 (q,  $J = 7.2$  Hz, 2H), 0.74 (t,  $J = 7.2$  Hz, 3H).

**<sup>13</sup>C NMR** (101 MHz, CDCl<sub>3</sub>)  $\delta$  161.7 (d,  $J = 245.4$  Hz), 141.3 (d,  $J = 3.2$  Hz), 128.8 (d,  $J = 7.8$  Hz), 114.8 (d,  $J = 21.2$  Hz), 82.0, 49.9, 27.8, 7.2.

**IR** (neat) cm<sup>-1</sup>  $\nu$ : 2940 (w), 1603 (m), 1505 (s), 1226 (s), 1158 (m), 1067 (m), 1015 (m), 829 (s), 732 (w).

**HRMS** (ESI)  $m/z$ : [M–OCH<sub>3</sub>]<sup>+</sup> Calcd for C<sub>15</sub>H<sub>13</sub>F<sub>2</sub><sup>+</sup> 231.0980; Found 231.098.

#### 2-(2-methoxybutan-2-yl)naphthalene (**2r**)

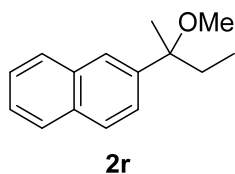

According to the general procedure for the copper-catalyzed three-component 1,2-alkoxy methylation of alkenes. The crude product was purified by flash column chromatography on silica gel (PE/CH<sub>2</sub>Cl<sub>2</sub> = 10/1, PE/EtOAc = 50/1) and then by PTLC (PE/DCM = 8/1) to afford **2r** (32,1 mg, 75% yield) as a colorless oil.

**<sup>1</sup>H NMR** (400 MHz, CDCl<sub>3</sub>)  $\delta$  7.91–7.72 (m, 4H), 7.61–7.44 (m, 3H), 3.11 (s, 3H), 1.90 (q,  $J = 7.4$  Hz, 2H), 1.62 (s, 3H), 0.80 (t,  $J = 7.4$  Hz, 3H).

**<sup>13</sup>C NMR** (100 MHz, CDCl<sub>3</sub>)  $\delta$  142.8, 133.3, 132.8, 128.2, 127.9, 127.6; 126.0, 125.8, 125.3, 124.9, 79.7, 50.6, 34.9, 22.5, 8.5.

**IR** (neat) cm<sup>-1</sup>  $\nu$ : 2971 (w), 2926 (w), 2881 (w), 2826 (w), 1600 (w), 1506 (w), 1463 (w), 1374 (w), 1298 (w), 1168 (m), 1082 (s), 822 (m), 746 (s).

**HRMS** (ESI) calcd for C<sub>15</sub>H<sub>19</sub>O<sup>+</sup> [M+H]<sup>+</sup> 215.1430; found 215.1431.

#### 1-ethyl-1-methoxy-1,2,3,4-tetrahydronaphthalene (**2s**)



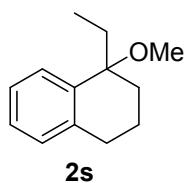

According to the general procedure for the copper-catalyzed three-component 1,2-alkoxy methylation of alkenes. The crude product was purified by flash column chromatography on silica gel (PE/CH<sub>2</sub>Cl<sub>2</sub> = 3/1) to afford **2s** (27.8 mg, 73% yield) as a colorless oil.

**<sup>1</sup>H NMR** (400 MHz, CDCl<sub>3</sub>)  $\delta$  7.31 (dd,  $J$  = 7.5, 1.7 Hz, 1H), 7.11–7.04 (m, 2H), 7.01–6.94 (m, 1H), 2.96 (s, 3H), 2.74–2.54 (m, 2H), 2.01–1.87 (m, 1H), 1.80–1.74 (m, 3H), 1.71 (q,  $J$  = 7.4 Hz, 2H), 0.77 (t,  $J$  = 7.4 Hz, 3H).

**<sup>13</sup>C NMR** (101 MHz, CDCl<sub>3</sub>)  $\delta$  139.7, 138.7, 128.8, 127.0, 126.9, 125.9, 77.9, 50.4, 35.2, 30.0, 29.5, 20.8, 8.4.

**IR** (neat) cm<sup>-1</sup>  $\nu$ : 2936 (w), 1486 (w), 1454 (m), 1186 (w), 1084 (s), 949 (w), 922 (w), 856 (w), 756 (s), 731 (w).

**HRMS** (ESI)  $m/z$ : [M + Na]<sup>+</sup> Calcd for C<sub>13</sub>H<sub>18</sub>NaO<sup>+</sup> 213.1250; Found 213.1251.

**(2-ethoxybutan-2-yl)benzene (2t)**

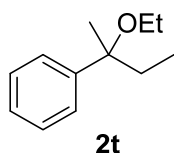

According to the general procedure for the copper-catalyzed three-component 1,2-alkoxy methylation of alkenes. The crude was purified by flash column chromatography on silica gel (PE/CH<sub>2</sub>Cl<sub>2</sub> = 10/1, PE/EtOAc = 50/1) and then PTLC (PE/EtOAc = 50/1) to afford **2t** (28.1 mg, 79% yield) as a colorless oil.

**<sup>1</sup>H NMR** (400 MHz, CDCl<sub>3</sub>)  $\delta$  7.43–7.22 (m, 5H), 3.32 (dq,  $J$  = 8.8, 7.0 Hz, 1H), 3.16 (dq,  $J$  = 8.8, 7.0 Hz, 1H), 1.82 (q,  $J$  = 7.4 Hz, 2H), 1.53 (s, 3H), 1.19 (t,  $J$  = 7.0 Hz, 3H), 0.80 (t,  $J$  = 7.4 Hz, 3H).

**<sup>13</sup>C NMR** (100 MHz, CDCl<sub>3</sub>)  $\delta$  146.0, 128.1, 126.7, 126.3, 79.2, 57.8, 35.4, 23.3, 16.0, 8.5.

**IR** (neat) cm<sup>-1</sup>  $\nu$ : 2973 (w), 2931 (w), 2878 (w), 1446 (w), 1230 (w), 1163 (w), 1107 (w), 1072 (s), 1029 (w), 759 (m), 700 (s).

**HRMS** (ESI) calcd for C<sub>12</sub>H<sub>19</sub>O<sup>+</sup> [M+H]<sup>+</sup> 179.1430; found 179.1435.

**(2-isopropoxybutan-2-yl)benzene (2u)**

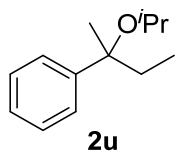

According to the general procedure for the copper-catalyzed three-component 1,2-alkoxy methylation of alkenes. The crude product was purified by flash column chromatography on silica gel (PE/CH<sub>2</sub>Cl<sub>2</sub> = 10/1, PE/EtOAc = 50/1) and then by PTLC (PE/EtOAc = 50/1) to afford **2u** (16.3 mg, 42% yield) as a colorless oil.

<sup>1</sup>H NMR (400 MHz, CDCl<sub>3</sub>) δ 7.46 (d, *J* = 7.5 Hz, 2H), 7.34 (dd, *J* = 7.5, 7.5 Hz, 2H), 7.31–7.22 (m, 1H), 3.59–3.50 (m, 1H), 1.82 (q, *J* = 7.4 Hz, 2H), 1.58 (s, 3H), 1.14 (d, *J* = 8.0 Hz, 3H), 1.02 (d, *J* = 8.1 Hz, 3H), 0.73 (t, *J* = 7.4 Hz, 3H).

<sup>13</sup>C NMR (101 MHz, CDCl<sub>3</sub>) δ 146.0, 127.8, 126.9, 126.8, 79.8, 65.2, 36.3, 25.2, 24.7, 23.2, 8.9.

IR (neat) cm<sup>-1</sup> υ: 2934 (w), 2934 (w), 2880 (w), 1447 (w), 1377 (w), 1165 (w), 1117 (m), 1049 (w), 1011 (w), 966 (w), 760 (m), 700 (s).

HRMS (ESI) calcd for C<sub>13</sub>H<sub>21</sub>O<sup>+</sup> [M+H]<sup>+</sup> 193.1587; found 193.1592.

#### General procedure for the copper-catalyzed three-component 1,2-azido methylation of alkenes

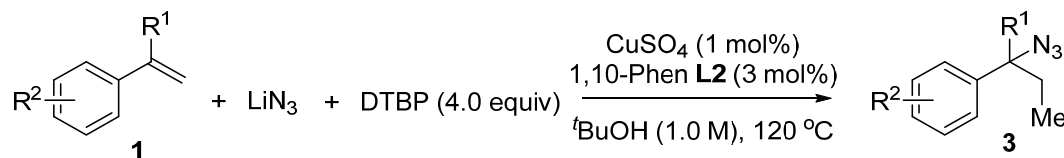

A screw cap tube was charged with CuSO<sub>4</sub> (0.32 mg, 0.002 mmol, 0.01 equiv), 1,10-Phen **L2** (1.08 mg, 0.003 mmol, 0.03 equiv) and *t*BuOH (2.0 mL). The mixture was stirred at 40 °C for 30 minutes, then cooled to room temperature. Substrate **1** (0.2 mmol, 1.0 equiv), LiN<sub>3</sub> (20% w/w, 0.12 mL, 2.5 equiv) and DTBP (0.15 mL, 4.0 equiv) were added to the above mixture, and the reaction mixture was stirred at 120 °C for 8 hours under N<sub>2</sub> atmosphere. The reaction was quenched with water, and the mixture was extracted with EtOAc. The organic extracts were washed with brine, dried over Na<sub>2</sub>SO<sub>4</sub>. The solvent was removed under reduced pressure. The residue was purified by flash chromatography to give **3**.

#### Characterization of compounds **3**

##### (2-azidobutan-2-yl)benzene (**3a**)

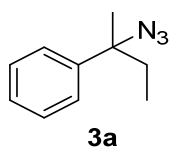

According to the general procedure for the copper-catalyzed three-component 1,2-azido methylation of alkenes. The crude product was purified by flash column chromatography on silica gel (PE) to afford **3a** (28.2 mg, 81% yield) as a colorless oil.

**<sup>1</sup>H NMR** (400 MHz, CDCl<sub>3</sub>)  $\delta$  7.44–7.35 (m, 4H), 7.33–7.27 (m, 1H), 1.99–1.82 (m, 2H), 1.69 (s, 3H), 0.83 (t,  $J = 7.4$  Hz, 3H).

**<sup>13</sup>C NMR** (101 MHz, CDCl<sub>3</sub>)  $\delta$  143.4, 128.6, 127.3, 125.8, 67.5, 35.2, 25.2, 8.8.

**IR** (neat) cm<sup>-1</sup>  $\nu$ : 2893 (w), 2338 (w), 2176 (m), 2117 (m), 1492 (s), 1411 (s), 1130 (s), 1069 (s), 925 (s), 786 (s), 703(s).

**HRMS** (ESI) calcd for C<sub>10</sub>H<sub>14</sub>N<sup>+</sup> [M-N<sub>2</sub>+H]<sup>+</sup> 148.1126; found 148.1129.

### 1-(2-azidobutan-2-yl)-4-methylbenzene (**3b**)

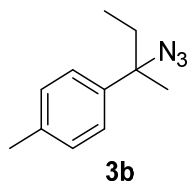

According to the general procedure for the copper-catalyzed three-component 1,2-azido methylation of alkenes. The crude product was purified by flash column chromatography on silica gel (PE) to afford **3b** (27.4 mg, 72% yield) as a colorless oil.

**<sup>1</sup>H NMR** (400 MHz, CDCl<sub>3</sub>)  $\delta$  7.19 (d,  $J = 8.3$  Hz, 2H), 7.09 (d,  $J = 8.0$  Hz, 2H), 2.27 (s, 3H), 1.83–1.70 (m, 2H), 1.56 (s, 3H), 0.72 (t,  $J = 7.4$  Hz, 3H).

**<sup>13</sup>C NMR** (101 MHz, CDCl<sub>3</sub>)  $\delta$  140.4, 137.0, 129.2, 125.7, 67.4, 35.1, 25.2, 21.1, 8.9.

**IR** (neat) cm<sup>-1</sup>  $\nu$ : 2093 (s), 1513 (w), 1460 (w), 1380 (w), 1294 (w), 1258 (m), 1191 (w), 1149 (w), 1020 (w), 854 (w), 814 (m), 705 (w), 647 (w).

**HRMS** (ESI) calcd for C<sub>11</sub>H<sub>16</sub>N<sup>+</sup> [M-N<sub>2</sub>+H]<sup>+</sup> 162.1283; found 162.1282.

### 1-(2-azidobutan-2-yl)-4-(trifluoromethoxy)benzene (**3c**)

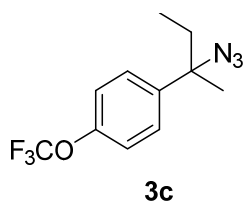

According to the general procedure for the copper-catalyzed three-component 1,2-azido methylation of alkenes. The crude product was purified by flash column chromatography on silica gel (PE) to afford **3c** (32.2 mg, 62% yield) as a colorless oil.

**<sup>1</sup>H NMR** (400 MHz, CDCl<sub>3</sub>) δ 7.45–7.36 (m, 2H), 7.24–7.13 (m, 2H), 1.96–1.78 (m, 2H), 1.66 (s, 3H), 0.80 (t, *J* = 7.4 Hz, 3H).

**<sup>13</sup>C NMR** (101 MHz, CDCl<sub>3</sub>) δ 148.4, 142.2, 127.3, 120.9, 120.6 (q, *J* = 258.6 Hz), 66.9, 35.2, 25.4, 8.8.

**IR** (neat) cm<sup>-1</sup> ν: 2098 (m), 1509 (w), 1461 (w), 1384 (w), 1253 (s), 1212 (s), 1163 (s), 1019 (w), 847 (w), 833 (w), 677 (w).

**HRMS** (ESI) calcd for C<sub>11</sub>H<sub>13</sub>F<sub>3</sub>NO<sup>+</sup> [M-N<sub>2</sub>+H]<sup>+</sup> 232.0949; found 232.0945.

#### 1-(2-azidobutan-2-yl)-4-chlorobenzene (**3d**)

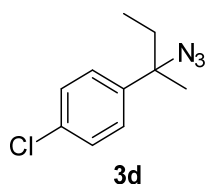

According to the general procedure for the copper-catalyzed three-component 1,2-azido methylation of alkenes. The crude product was purified by flash column chromatography on silica gel (PE) to afford **3d** (36.0 mg, 86% yield) as a colorless oil.

**<sup>1</sup>H NMR** (400 MHz, CDCl<sub>3</sub>) δ 7.36–7.30 (m, 4H), 1.95–1.76 (m, 2H), 1.65 (s, 3H), 0.79 (t, *J* = 7.4 Hz, 3H).

**<sup>13</sup>C NMR** (101 MHz, CDCl<sub>3</sub>) δ 142.0, 133.2, 128.7, 127.3, 67.0, 35.1, 25.3, 8.8.

**HRMS** (ESI) calcd for C<sub>10</sub>H<sub>13</sub>ClN<sup>+</sup> [M-N<sub>2</sub>+H]<sup>+</sup> 182.0737; found 182.0737.

**IR** (neat) cm<sup>-1</sup> ν: 2098 (m), 1509 (w), 1253 (s), 1212 (s), 1160 (s), 1019 (w), 923 (w), 847 (w), 807 (w), 677 (w), 618 (m).

#### 1-(2-azidobutan-2-yl)-4-bromobenzene (**3e**)

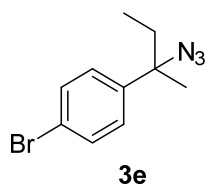

According to the general procedure for the copper-catalyzed three-component 1,2-azido methylation of alkenes. The crude product was purified by flash column chromatography on silica gel (PE) to afford **3e** (32.5 mg, 64% yield) as a colorless oil.

**<sup>1</sup>H NMR** (400 MHz, CDCl<sub>3</sub>) δ 7.51(d, *J* = 8.4 Hz, 2H), 7.28 (d, *J* = 8.4 Hz, 2H), 1.95–1.80 (m, 2H), 1.67 (s, 3H), 0.81 (t, *J* = 7.4 Hz, 3H).

**<sup>13</sup>C NMR** (101 MHz, CDCl<sub>3</sub>) δ 142.6, 131.6, 127.6, 121.3, 67.0, 35.0, 25.3, 8.8.

**IR** (neat) cm<sup>-1</sup> υ: 2095 (s), 1489 (w), 1487 (w), 1397 (w), 1294 (w), 1255 (m), 1102 (w), 1008 (s), 853 (w), 820 (s), 717 (w).

**HRMS** (ESI) calcd for C<sub>10</sub>H<sub>13</sub>NBr<sup>+</sup> [M-N<sub>2</sub>+H]<sup>+</sup> 226.0231; found 226.0233.

#### 1-(2-azidobutan-2-yl)-4-nitrobenzene (**3f**)

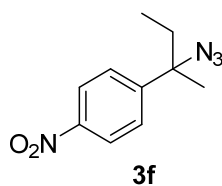

According to the general procedure for the copper-catalyzed three-component 1,2-azido methylation of alkenes. The crude product was purified by flash column chromatography on silica gel (PE) to afford **3f** (34.5 mg, 78% yield) as a pale yellow oil.

**<sup>1</sup>H NMR** (400 MHz, CDCl<sub>3</sub>) δ 8.11 (d, *J* = 9.0 Hz, 2H), 7.46 (d, *J* = 8.9 Hz, 2H), 1.90–1.73 (m, 2H), 1.60 (s, 3H), 0.69 (t, *J* = 7.4 Hz, 3H).

**<sup>13</sup>C NMR** (101 MHz, CDCl<sub>3</sub>) δ 150.9, 130.2, 126.8, 123.8, 67.0, 35.0, 25.6, 8.7.

**IR** (neat) cm<sup>-1</sup> υ: 2095 (s), 1948 (w), 1599(w), 1463 (w), 1411 (w), 1286(w), 1258(m), 1093 (w), 1089 (w), 999 (w), 872 (w), 796 (m), 699 (s).

**HRMS** (APPI) m/z: [M-N<sub>2</sub>+H]<sup>+</sup> Calcd for C<sub>10</sub>H<sub>13</sub>N<sub>2</sub>O<sub>2</sub><sup>+</sup> 193.0972; Found 193.0976.

#### 4-(2-azidobutan-2-yl)benzonitrile (**3g**)

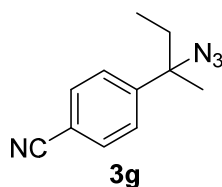

According to the general procedure for the copper-catalyzed three-component 1,2-azido methylation of alkenes. The crude product was purified by flash column chromatography on silica gel (PE) to afford **3g** (32.7 mg, 82% yield) as a pale yellow oil.

**<sup>1</sup>H NMR** (400 MHz, CDCl<sub>3</sub>)  $\delta$  7.56 (d,  $J$  = 8.6 Hz, 2H), 7.40 (d,  $J$  = 8.5 Hz, 2H), 1.87–1.69 (m, 2H), 1.57 (s, 3H), 0.68 (t,  $J$  = 7.4 Hz, 3H).

**<sup>13</sup>C NMR** (101 MHz, CDCl<sub>3</sub>)  $\delta$  148.9, 132.4, 126.6, 118.7, 111.3, 67.0, 34.9, 25.4, 8.7.

**IR** (neat) cm<sup>-1</sup>  $\nu$ : 2099 (s), 1998(w), 1457 (w), 1385 (w), 1291 (w), 1256(m), 1026 (w), 908 (w), 799 (m), 754 (w).

**HRMS** (APPI)  $m/z$ : [M–N<sub>2</sub>+H]<sup>+</sup> Calcd for C<sub>11</sub>H<sub>13</sub>N<sub>2</sub><sup>+</sup> 173.1073; Found 173.1077.

### 1-(2-azidobutan-2-yl)-3-methoxybenzene (**3h**)

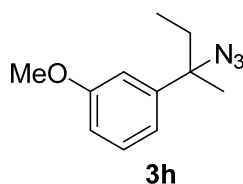

According to the general procedure for the copper-catalyzed three-component 1,2-azido methylation of alkenes. The crude product was purified by flash column chromatography on silica gel (PE) to afford **3h** (2.4 mg, 64% yield) as a colorless oil.

**<sup>1</sup>H NMR** (400 MHz, CDCl<sub>3</sub>)  $\delta$  7.25–7.19 (m, 1H), 6.95–6.89 (m, 2H), 6.79–6.74 (m, 1H), 3.78 (s, 3H), 1.88–1.75 (m, 2H), 1.61 (s, 3H), 0.76 (t,  $J$  = 7.4 Hz, 3H).

**<sup>13</sup>C NMR** (101 MHz, CDCl<sub>3</sub>)  $\delta$  159.8, 145.2, 129.5, 118.1, 112.2, 67.4, 55.4, 35.1, 25.3, 8.8.

**IR** (neat) cm<sup>-1</sup>  $\nu$ : 2093 (s), 1612 (w), 1513 (m), 1462 (w), 1301 (w), 1248 (s), 1181 (m), 1034 (m), 828 (m), 687 (w), 651 (w).

**HRMS** (ESI) calcd for C<sub>11</sub>H<sub>16</sub>NO<sup>+</sup> [M–N<sub>2</sub>+H]<sup>+</sup> 178.1232; found 178.1231.

### 1-(2-azidobutan-2-yl)-3-methylbenzene (**3i**)

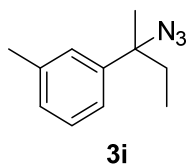

According to the general procedure for the copper-catalyzed three-component 1,2-azido methylation of alkenes. The crude product was purified by flash column chromatography on silica gel (PE) to afford **3i** (27.9 mg, 74% yield) as a colorless oil.

**<sup>1</sup>H NMR** (400 MHz, CDCl<sub>3</sub>)  $\delta$  7.28 (t,  $J$  = 7.6 Hz, 1H), 7.25–7.18 (m, 2H), 7.12 (d,  $J$  = 7.5 Hz, 1H), 2.41 (s, 3H), 1.95–1.85 (m, 2H), 1.68 (s, 3H), 0.84 (t,  $J$  = 7.4 Hz, 3H).

**<sup>13</sup>C NMR** (101 MHz, CDCl<sub>3</sub>)  $\delta$  143.4, 138.1, 128.4, 128.0, 126.5, 122.8, 67.4, 35.1, 25.3, 21.8, 8.9.

**IR** 2098 (s), 1605 (w), 1463 (w), 1380 (w), 1268 (w), 1248 (m), 1149 (w), 1046 (w), 782 (m), 704 (s), 670 (w).

**HRMS** (ESI) calcd for C<sub>11</sub>H<sub>16</sub>N<sup>+</sup> [M–N<sub>2</sub>+H]<sup>+</sup> 162.1283; found 162.1280.

### 1-(2-azidobutan-2-yl)-3-chlorobenzene (**3j**)

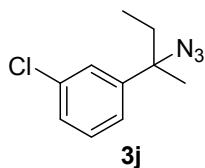

According to the general procedure for the copper-catalyzed three-component 1,2-azido methylation of alkenes. The crude product was purified by flash column chromatography on silica gel (PE) to afford **3j** (32.8 mg, 78% yield) as a colorless oil.

**<sup>1</sup>H NMR** (400 MHz, CDCl<sub>3</sub>)  $\delta$  7.40 (s, 1H), 7.35–7.22 (m, 3H), 1.94–1.83 (m, 2H), 1.68 (s, 3H), 0.82 (t,  $J$  = 7.4 Hz, 3H).

**<sup>13</sup>C NMR** (101 MHz, CDCl<sub>3</sub>)  $\delta$  140.2, 136.4, 133.0, 127.7, 127.2, 125.8, 68.3, 32.8, 24.6, 21.9, 9.1.

**IR** (neat) cm<sup>-1</sup>  $\nu$ : 2097 (s), 1945 (w), 1596 (w), 1569 (w), 1465 (w), 1415 (w), 1411 (w), 1292 (w), 1255 (m), 1099 (w), 1084 (w), 999 (w), 872 (w), 791 (m), 700 (s).

**HRMS** (ESI) calcd for C<sub>10</sub>H<sub>13</sub>ClN<sup>+</sup> [M–N<sub>2</sub>+H]<sup>+</sup> 182.0737; found 182.0737.

### 1-(2-azidobutan-2-yl)-2-methylbenzene (**3k**)

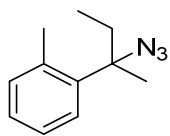

**3k**

According to the general procedure for the copper-catalyzed three-component 1,2-azido methylation of alkenes. The crude product was purified by flash column chromatography on silica gel (PE) to afford **3k** (23.7 mg, 63% yield) as a colorless oil.

**<sup>1</sup>H NMR** (400 MHz, CDCl<sub>3</sub>)  $\delta$  7.36–7.29 (m, 1H), 7.23–7.12 (m, 3H), 2.58 (s, 3H), 2.00–1.91 (m, 2H), 1.73 (s, 3H), 0.83 (t,  $J = 7.4$  Hz, 3H).

**<sup>13</sup>C NMR** (101 MHz, CDCl<sub>3</sub>)  $\delta$  140.1, 136.2, 132.9, 127.5, 127.1, 125.6, 68.1, 32.6, 24.5, 21.8, 9.0.

**IR** (neat) cm<sup>-1</sup>  $\nu$ : 2949 (w), 2891 (w), 2338 (w), 2173 (m), 2117 (m), 1490 (s), 1411 (s), 1319 (s), 1130 (s), 1066 (s), 927 (s), 779 (s), 704 (s).

**HRMS** (ESI) calcd for C<sub>11</sub>H<sub>16</sub>N<sup>+</sup> [M–N<sub>2</sub>+H]<sup>+</sup> 162.1283; found 162.1280.

#### 4-(2-azidobutan-2-yl)-1,2-dimethylbenzene (**3l**)

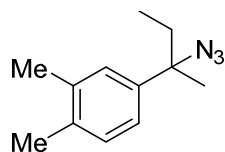

**3l**

According to the general procedure for the copper-catalyzed three-component 1,2-azido methylation of alkenes. The crude product was purified by flash column chromatography on silica gel (PE) to afford **3l** (26.3 mg, 65% yield) as a colorless oil.

**<sup>1</sup>H NMR** (400 MHz, CDCl<sub>3</sub>)  $\delta$  7.17–7.14 (m, 1H), 7.14–7.08 (m, 2H), 2.29 (s, 3H), 2.26 (s, 3H), 1.92–1.81 (m, 2H), 1.64 (s, 3H), 0.81 (t,  $J = 7.4$  Hz, 3H).

**<sup>13</sup>C NMR** (101 MHz, CDCl<sub>3</sub>)  $\delta$  140.9, 136.7, 135.6, 129.8, 127.1, 123.2, 67.4, 35.1, 25.2, 20.2, 19.5, 8.9.

**IR** (neat) cm<sup>-1</sup>  $\nu$ : 2123 (m), 1489 (w), 1431 (m), 1357 (w), 1279 (s), 1110 (s), 974 (m), 852 (w), 791 (s).

**HRMS** (ESI) calcd for C<sub>12</sub>H<sub>18</sub>N<sup>+</sup> [M–N<sub>2</sub>+H]<sup>+</sup> 176.1439; found 176.1438.

#### (3-azidopentan-3-yl)benzene (**3m**)



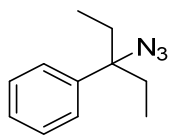

**3m**

According to the general procedure for the copper-catalyzed three-component 1,2-azido methylation of alkenes. The crude product was purified by flash column chromatography on silica gel (PE) to afford **3m** (28.8 mg, 76% yield) as a colorless oil.

**<sup>1</sup>H NMR** (400 MHz, CDCl<sub>3</sub>)  $\delta$  7.31–7.22 (m, 4H), 7.21–7.12 (m, 1H), 1.97–1.81 (m, 4H), 0.71 (t,  $J$  = 7.4 Hz, 6H).

**<sup>13</sup>C NMR** (101 MHz, CDCl<sub>3</sub>)  $\delta$  141.4, 128.4, 127.0, 126.3, 71.2, 32.5, 8.5.

**IR** (neat) cm<sup>-1</sup>  $\nu$ : 2049 (w), 1800 (w), 1699 (w), 1653 (w), 1542 (m), 1490 (s), 1458 (m), 1255 (s), 1096 (m), 1014 (m), 891 (m), 826 (s), 763 (s), 759 (s).

**HRMS** (ESI) calcd for C<sub>11</sub>H<sub>16</sub>N<sup>+</sup> [M–N<sub>2</sub>+H]<sup>+</sup> 162.1283; found 162.1284.

### **(3-azido-2-methylpentan-3-yl)benzene (3n)**

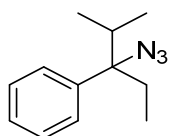

**3n**

According to the general procedure for the copper-catalyzed three-component 1,2-azido methylation of alkenes. The crude product was purified by flash column chromatography on silica gel (PE) to afford **3n** (29.1 mg, 72% yield) as a colorless oil.

**<sup>1</sup>H NMR** (400 MHz, CDCl<sub>3</sub>)  $\delta$  7.30–7.22 (m, 4H), 7.20–7.15 (m, 1H), 2.17–1.93 (m, 3H), 0.88 (d,  $J$  = 6.8 Hz, 3H), 0.74 (t,  $J$  = 7.3 Hz, 3H), 0.70 (d,  $J$  = 6.8 Hz, 3H).

**<sup>13</sup>C NMR** (101 MHz, CDCl<sub>3</sub>)  $\delta$  140.3, 128.1, 127.0, 126.9, 73.8, 38.2, 29.4, 18.1, 17.6, 8.8.

**IR** (neat) cm<sup>-1</sup>  $\nu$ : 2096 (s), 1494 (w), 1447 (w), 1265 (w), 936 (w), 887 (w), 760 (m), 702 (s), 632 (m).

**HRMS** (ESI) calcd for C<sub>12</sub>H<sub>18</sub>N<sup>+</sup> [M–N<sub>2</sub>+H]<sup>+</sup> 176.1439; found 176.1440.

### **(3-azidopentane-1,3-diyl)dibenzene (3o)**

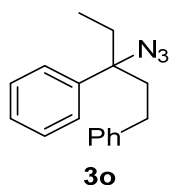

According to the general procedure for the copper-catalyzed three-component 1,2-azido methylation of alkenes. The crude product was purified by flash column chromatography on silica gel (PE) to afford **3o** (33.6 mg, 63% yield) as a colorless oil.

**<sup>1</sup>H NMR** (400 MHz, CDCl<sub>3</sub>)  $\delta$  7.36–7.28 (m, 3H), 7.25–7.15 (m, 4H), 7.13–7.07 (m, 1H), 7.06–7.00 (m, 2H), 2.59–2.47 (m, 1H), 2.31–2.20 (m, 1H), 2.20–2.06 (m, 2H), 2.03–1.82 (m, 2H), 0.74 (t,  $J$  = 7.4 Hz, 3H).

**<sup>13</sup>C NMR** (101 MHz, CDCl<sub>3</sub>)  $\delta$  141.9, 141.3, 128.6, 128.6, 128.4, 127.2, 126.2, 126.1, 70.6, 42.0, 33.1, 30.6, 8.5.

**IR** (neat) cm<sup>-1</sup>  $\nu$ : 2098 (s), 1542 (w), 1490 (w), 1255 (w), 1096 (w), 1014 (w), 891 (w), 826 (w), 763 (m), 759 (w), 699 (s).

**HRMS** (ESI) calcd for C<sub>17</sub>H<sub>20</sub>N<sup>+</sup> [M–N<sub>2</sub>+H]<sup>+</sup> 238.1590; found 238.1596.

#### (1-azidopropane-1,1-diyl)dibenzene (**3p**)

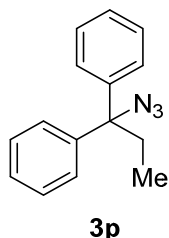

According to the general procedure for the copper-catalyzed three-component 1,2-azido methylation of alkenes. The crude product was purified by flash column chromatography on silica gel (PE) to afford **3p** (37.1 mg, 78% yield) as a colorless oil.

**<sup>1</sup>H NMR** (400 MHz, CDCl<sub>3</sub>)  $\delta$  7.40–7.34 (m, 8H), 7.33–7.28 (m, 2H), 2.48 (q,  $J$  = 7.3 Hz, 2H), 0.89 (t,  $J$  = 7.3 Hz, 3H).

**<sup>13</sup>C NMR** (101 MHz, CDCl<sub>3</sub>)  $\delta$  143.1, 128.4, 127.5, 127.3, 73.2, 31.7, 8.7.

**IR** (neat) cm<sup>-1</sup>  $\nu$ : 2096 (s), 1492 (w), 1447 (w), 1252 (m), 1217 (w), 1033 (w), 888 (w), 754 (m), 696 (s).

**HRMS** (ESI) calcd for C<sub>15</sub>H<sub>16</sub>N<sup>+</sup> [M–N<sub>2</sub>+H]<sup>+</sup> 210.1277; found 210.1279.

#### 4,4'-(1-azidopropane-1,1-diyl)bis(fluorobenzene) (**3q**)

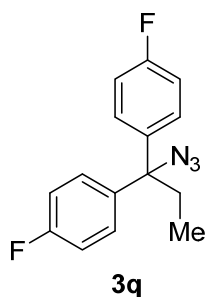

According to the general procedure for the copper-catalyzed three-component 1,2-azido methylation of alkenes. The crude product was purified by flash column chromatography on silica gel (PE) to afford **3q** (29.4 mg, 54% yield) as a colorless oil.

**<sup>1</sup>H NMR** (400 MHz, CDCl<sub>3</sub>) δ 7.40–7.23 (m, 4H), 7.08–7.02 (m, 4H), 2.41 (q, *J* = 7.3 Hz, 2H), 0.85 (t, *J* = 7.3 Hz, 3H).

**<sup>13</sup>C NMR** (101 MHz, CDCl<sub>3</sub>) δ 162.1 (d, *J* = 247.1 Hz), 138.8 (d, *J* = 3.3 Hz), 129.0 (d, *J* = 8.1 Hz), 115.3 (d, *J* = 21.3 Hz), 72.2, 31.9, 8.6.

**IR** (neat) cm<sup>-1</sup> ν: 2098 (s), 1510 (w), 1377 (w), 1257 (m), 1099 (w), 901 (w), 759 (w), 700 (m).

**HRMS** (APPI) *m/z*: [M–N<sub>2</sub>+H]<sup>+</sup> Calcd for C<sub>15</sub>H<sub>14</sub>F<sub>2</sub>N<sup>+</sup> 246.1089; Found 246.1093.

#### 4,4'-(1-azidopropane-1,1-diyl)bis(chlorobenzene) (**3r**)

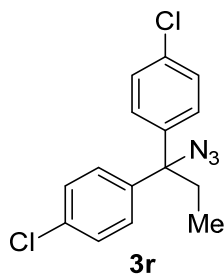

According to the general procedure for the copper-catalyzed three-component 1,2-azido methylation of alkenes. The crude product was purified by flash column chromatography on silica gel (PE) to afford **3r** (50.3 mg, 85% yield) as a colorless oil.

**<sup>1</sup>H NMR** (400 MHz, CDCl<sub>3</sub>) δ 7.31 (d, *J* = 8.7 Hz, 4H), 7.23 (d, *J* = 8.7 Hz, 4H), 2.38 (q, *J* = 7.3 Hz, 2H), 0.83 (t, *J* = 7.2 Hz, 3H).

**<sup>13</sup>C NMR** (101 MHz, CDCl<sub>3</sub>) δ 141.3, 133.7, 128.7, 128.6, 72.1, 31.5, 8.6.

**IR** (neat) cm<sup>-1</sup> ν: 2096 (s), 1494 (w), 1463 (w), 1448 (w), 1312 (w), 1260 (m), 1140 (w), 1079 (w), 1030 (w), 884 (w), 806 (w), 758 (m), 699 (s).

**HRMS** (ESI) calcd for C<sub>15</sub>H<sub>14</sub>Cl<sub>2</sub>N<sup>+</sup> [M–N<sub>2</sub>+H]<sup>+</sup> 278.0498; found 278.0504.

### 4,4'-(1-azidopropane-1,1-diyl)bis(methylbenzene) (3s)

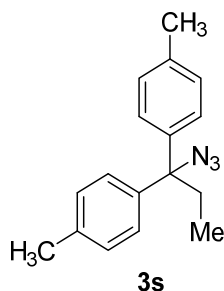

According to the general procedure for the copper-catalyzed three-component 1,2-azido methylation of alkenes. The crude product was purified by flash column chromatography on silica gel (PE) to afford **3s** (32.9 mg, 62% yield) as a colorless oil.

**<sup>1</sup>H NMR** (400 MHz, CDCl<sub>3</sub>)  $\delta$  7.21 (d,  $J$  = 8.3 Hz, 4H), 7.14 (d,  $J$  = 8.1 Hz, 4H), 2.41 (q,  $J$  = 7.3 Hz, 2H), 2.35 (s, 6H), 0.85 (t,  $J$  = 7.3 Hz, 3H).

**<sup>13</sup>C NMR** (101 MHz, CDCl<sub>3</sub>)  $\delta$  140.3, 137.1, 129.0, 127.1, 73.0, 31.8, 21.1, 8.8.

**IR** (neat) cm<sup>-1</sup>  $\nu$ : 2098 (s), 1993 (w), 1510 (w), 1455 (w), 1380 (w), 1285 (w), 1257 (m), 1022 (w), 901 (w), 810 (m), 759 (w).

**HRMS** (ESI) calcd for C<sub>17</sub>H<sub>20</sub>N<sup>+</sup> [M-N<sub>2</sub>+H]<sup>+</sup> 238.1590; found 238.1601.

### 1-(1-azido-1-phenylpropyl)-4-chlorobenzene (3t)

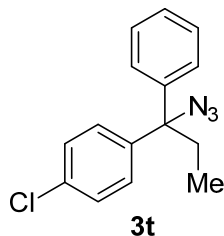

According to the general procedure for the copper-catalyzed three-component 1,2-azido methylation of alkenes. The crude product was purified by flash column chromatography on silica gel (PE) to afford **3t** (47.6 mg, 88% yield) as a colorless oil.

**<sup>1</sup>H NMR** (400 MHz, CDCl<sub>3</sub>)  $\delta$  7.41–7.31 (m, 7H), 7.31–7.26 (m, 2H), 2.48–2.40 (m, 2H), 0.88 (t,  $J$  = 7.3 Hz, 3H).

**<sup>13</sup>C NMR** (101 MHz, CDCl<sub>3</sub>)  $\delta$  142.6, 141.7, 133.4, 128.7, 128.5, 128.5, 127.8, 127.2, 72.6, 31.6, 8.6

**IR** (neat) cm<sup>-1</sup>  $\nu$ : 2097 (s), 1598 (w), 1492 (w), 1448 (w), 1257 (m), 1103 (w), 1014 (w), 825 (m), 764 (m).

**HRMS** (ESI) calcd for C<sub>15</sub>H<sub>15</sub>ClN<sup>+</sup> [M-N<sub>2</sub>+H]<sup>+</sup> 244.0888; found 244.0886.

### 1-(1-azido-1-phenylpropyl)-3-methylbenzene (**3u**)

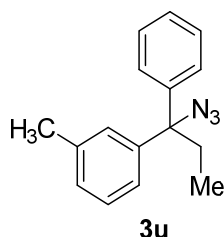

According to the general procedure for the copper-catalyzed three-component 1,2-azido methylation of alkenes. The crude product was purified by flash column chromatography on silica gel (PE) to afford **3u** (35.7 mg, 71% yield) as a colorless oil.

<sup>1</sup>H NMR (400 MHz, CDCl<sub>3</sub>) δ 7.40–7.35 (m, 4H), 7.34–7.23 (m, 2H), 7.20–7.10 (m, 3H), 2.47 (q, *J* = 7.3 Hz, 2H), 2.38 (s, 3H), 0.89 (t, *J* = 7.3 Hz, 3H).

<sup>13</sup>C NMR (101 MHz, CDCl<sub>3</sub>) δ 143.2, 143.0, 138.0, 128.3, 128.2, 128.2, 127.9, 127.4, 127.2, 124.4, 73.2, 31.7, 21.8, 8.8.

IR (neat) cm<sup>-1</sup> ν: 2161 (w), 1984 (w), 1598 (w), 1448 (w), 1234 (m), 1190 (w), 1014 (m), 891 (m), 764 (s), 704 (s).

HRMS (ESI) *m/z*: [M–N<sub>2</sub>+H]<sup>+</sup> Calcd for C<sub>16</sub>H<sub>18</sub>N<sup>+</sup> 224.1434; Found 224.1432.

### General procedure for the copper-catalyzed methylative cycloetherification of alkenes

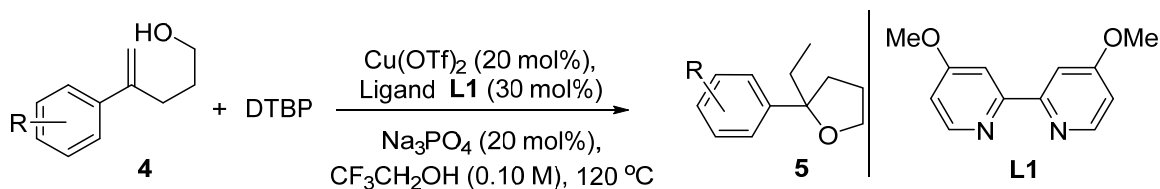

A screw cap tube was charged with Cu(OTf)<sub>2</sub> (14.5 mg, 0.04 mmol, 0.2 equiv), **L1** (13.0 mg, 0.06 mmol, 0.03 equiv) and CF<sub>3</sub>CH<sub>2</sub>OH (2.0 mL). The mixture was stirred at room temperature for 30 minutes. Substrate **4** (0.2 mmol, 1.0 equiv), Na<sub>3</sub>PO<sub>4</sub> (6.5 mg, 0.04 mmol, 0.2 equiv) and DTBP (0.15 mL, 4.0 equiv) were added to the above mixture, and the reaction mixture was stirred at 120 °C for 6 hours under N<sub>2</sub> atmosphere. The reaction was quenched with water, and the mixture was extracted with EtOAc. The organic extracts were washed with brine, dried over Na<sub>2</sub>SO<sub>4</sub>. The solvent was removed under reduced pressure. The residue was purified by flash chromatography to give **5**.

### Characterization of compounds **5**

#### 2-ethyl-2-phenyltetrahydrofuran (**5a**)

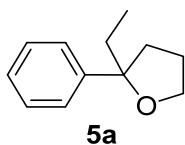

According to the general procedure for the copper-catalyzed methylative cycloetherification of alkenes. The crude product was purified by flash column chromatography on silica gel (PE/EtOAc = 15/1) to afford **5a** (28.8 mg, 82% yield) as a colorless oil.

**<sup>1</sup>H NMR** (400 MHz, CDCl<sub>3</sub>)  $\delta$  7.40–7.29 (m, 4H), 7.25–7.18 (m, 1H), 4.00–3.95 (m, 1H), , 1H), 3.90 (dt,  $J$  = 5.7, 8.0, Hz, 1H), 2.22–2.15 (m, 1H), 2.09–2.01 (m, 1H), 2.00–1.89 (m, 1H), 1.81 (m, 3H), 0.78 (t,  $J$  = 7.4 Hz, 3H).

**<sup>13</sup>C NMR** (101 MHz, CDCl<sub>3</sub>)  $\delta$  146.7, 128.0, 126.3, 125.5, 87.3, 67.6, 37.9, 35.2, 25.8, 8.9.

**HRMS** (APPI)  $m/z$ : [M–C<sub>2</sub>H<sub>5</sub>]<sup>+</sup> Calcd for C<sub>10</sub>H<sub>11</sub>O<sup>+</sup> 147.0804; Found 147.0804.

**IR** (neat) cm<sup>-1</sup>  $\nu$ : 2024 (w), 1494 (w), 1450 (w), 1280 (w), 1261 (w), 1161 (m), 1057 (s), 1032 (s), 802 (m), 760 (s), 702 (s).

### 2-ethyl-2-(p-tolyl)tetrahydrofuran (**5b**)

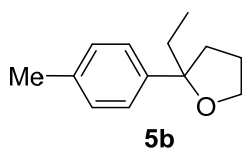

According to the general procedure for the copper-catalyzed methylative cycloetherification of alkenes. The crude product was purified by flash column chromatography on silica gel (PE/EtOAc = 15/1) to afford **5b** (30.9 mg, 81% yield) as a colorless oil.

**<sup>1</sup>H NMR** (400 MHz, CDCl<sub>3</sub>)  $\delta$  7.16 (d,  $J$  = 8.2 Hz, 2H), 7.05 (d,  $J$  = 7.7 Hz, 2H), 3.90–3.86 (m, 1H), 3.79 (td,  $J$  = 8.0, 5.6 Hz, 1H), 2.26 (s, 3H), 2.08 (ddd,  $J$  = 11.8, 7.9, 4.8 Hz, 1H), 1.96–1.90 (m, 1H), 1.89–1.78 (m, 1H), 1.78–1.63 (m, 3H), 0.68 (t,  $J$  = 7.4 Hz, 3H).

**<sup>13</sup>C NMR** (101 MHz, CDCl<sub>3</sub>)  $\delta$  143.7, 135.8, 128.7, 125.5, 87.2, 67.5, 37.8, 35.2, 25.8, 21.1, 8.9.

**HRMS** (APPI)  $m/z$ : [M–C<sub>2</sub>H<sub>5</sub>]<sup>+</sup> Calcd for C<sub>11</sub>H<sub>13</sub>O<sup>+</sup> 161.0961; Found 161.0963.

**IR** (neat) cm<sup>-1</sup>  $\nu$ : 1511 (w), 1456 (w), 1262 (w), 1182 (w), 1101 (w), 1057 (m), 1038 (s), 909 (w), 816 (s), 721 (m).

### 2-ethyl-2-(4-methoxyphenyl)tetrahydrofuran (**5c**)

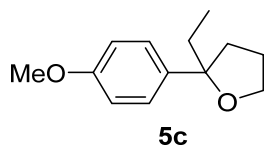

According to the general procedure for the copper-catalyzed methylative cycloetherification of alkenes. The crude product was purified by flash column chromatography on silica gel (PE/EtOAc = 15/1) to afford **5c** (26.8 mg, 65% yield) as a colorless oil.

**<sup>1</sup>H NMR** (400 MHz, CDCl<sub>3</sub>)  $\delta$  7.29 (d,  $J$  = 8.8 Hz, 2H), 6.88 (d,  $J$  = 8.8 Hz, 2H), 3.97 (q,  $J$  = 7.3, 6.9 Hz, 1H), 3.91–3.86 (m, 1H), 3.82 (s, 3H), 2.17 (ddd,  $J$  = 11.9, 7.9, 4.5 Hz, 1H), 2.08–1.89 (m, 2H), 1.88–1.75 (m, 3H), 0.78 (t,  $J$  = 7.4 Hz, 3H).

**<sup>13</sup>C NMR** (101 MHz, CDCl<sub>3</sub>)  $\delta$  158.1, 138.7, 126.6, 113.4, 87.0, 67.4, 55.3, 37.7, 35.3, 25.7, 9.0.

**HRMS** (APPI)  $m/z$ : [M + H]<sup>+</sup> Calcd for C<sub>13</sub>H<sub>19</sub>O<sub>2</sub><sup>+</sup> 207.1380; Found 207.1380.

**IR** (neat) cm<sup>-1</sup>  $\nu$ : 1611 (w), 1605 (w), 1510 (s), 1463 (w), 1297 (w), 1245 (s), 1175 (m), 1105 (w), 1036 (s), 913 (w), 830 (s), 721 (w).

#### 2-ethyl-2-(4-fluorophenyl)tetrahydrofuran (**5d**)

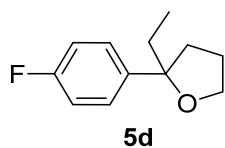

According to the general procedure for the copper-catalyzed methylative cycloetherification of alkenes. The crude product was purified by flash column chromatography on silica gel (PE/EtOAc = 15/1) to afford **5d** (25.2 mg, 68% yield) as a colorless oil.

**<sup>1</sup>H NMR** (400 MHz, CDCl<sub>3</sub>)  $\delta$  7.32–7.29 (m, 2H), 6.99 (t,  $J$  = 8.8 Hz, 2H), 4.00–3.90 (m, 1H), 3.89–3.83 (m, 1H), 2.13 (ddd,  $J$  = 12.5, 8.0, 4.9 Hz, 1H), 2.06–1.98 (m, 1H), 1.98–1.88 (m, 1H), 1.84–1.72 (m, 3H), 0.75 (t,  $J$  = 7.4 Hz, 3H).

**<sup>13</sup>C NMR** (101 MHz, CDCl<sub>3</sub>)  $\delta$  161.6 (d,  $J$  = 243.9 Hz), 142.4 (d,  $J$  = 3.1 Hz), 127.1 (d,  $J$  = 7.9 Hz), 114.7 (d,  $J$  = 21.2 Hz), 87.0, 67.6, 38.0, 35.2, 25.7, 8.9.

**HRMS** (APPI)  $m/z$ : [M–C<sub>2</sub>H<sub>5</sub>]<sup>+</sup> Calcd for C<sub>10</sub>H<sub>10</sub>FO<sup>+</sup> 165.0710; Found 165.0710.

**IR** (neat) cm<sup>-1</sup>  $\nu$ : 1603 (w), 1507 (s), 1460 (w), 1296 (w), 1222 (m), 1158 (m), 1092 (w), 1057 (m), 1038 (m), 910 (w), 835 (s), 722 (m).

#### 2-(4-chlorophenyl)-2-ethyltetrahydrofuran (**5e**)

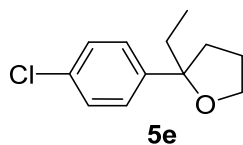

According to the general procedure for the copper-catalyzed methylative cycloetherification of alkenes. The crude product was purified by flash column chromatography on silica gel (PE/EtOAc = 15/1) to afford **5e** (28.8 mg, 67% yield) as a colorless oil.

**<sup>1</sup>H NMR** (400 MHz, CDCl<sub>3</sub>) δ 7.28 (s, 4H), 4.00–3.91 (m, 1H), 3.88–3.83 (m, 1H), 2.15–2.08 (m, 1H), 2.06–1.99 (m, 1H), 1.97–1.87 (m, 1H), 1.84–1.68 (m, 3H), 0.75 (t, *J* = 7.4 Hz, 3H).

**<sup>13</sup>C NMR** (101 MHz, CDCl<sub>3</sub>) δ 145.3, 132.1, 128.2, 127.0, 86.9, 67.6, 38.0, 35.1, 25.7, 8.8.

**HRMS** (APPI) *m/z*: [M–C<sub>2</sub>H<sub>5</sub>]<sup>+</sup> Calcd for C<sub>10</sub>H<sub>10</sub>ClO<sup>+</sup> 181.0415; Found 181.0415.

**IR** (neat) cm<sup>-1</sup> ν: 1489 (m), 1459 (w), 1398 (w), 1292 (w), 1167 (w), 1091 (s), 1058 (s), 1013 (s), 910 (m), 823 (s), 744 (w).

### 2-(4-bromophenyl)-2-ethyltetrahydrofuran (**5f**)

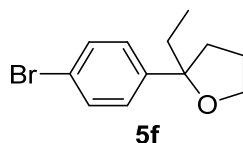

According to the general procedure for the copper-catalyzed methylative cycloetherification of alkenes. The crude product was purified by flash column chromatography on silica gel (PE/EtOAc = 15/1) to afford **5f** (36.2 mg, 71% yield) as a colorless oil.

**<sup>1</sup>H NMR** (400 MHz, CDCl<sub>3</sub>) δ 7.43 (d, *J* = 8.5 Hz, 2H), 7.23 (d, *J* = 8.5 Hz, 2H), 4.03–3.91 (m, 1H), 3.89–3.82 (m, 1H), 2.11 (ddd, *J* = 12.7, 8.0, 5.0 Hz, 1H), 2.06–1.99 (m, 1H), 1.96–1.88 (m, 1H), 1.83–1.67 (m, 3H), 0.74 (t, *J* = 7.4 Hz, 3H).

**<sup>13</sup>C NMR** (101 MHz, CDCl<sub>3</sub>) δ 145.9, 131.1, 127.4, 120.2, 87.0, 67.6, 38.0, 35.0, 25.7, 8.8.

**HRMS** (APPI) *m/z*: [M–C<sub>2</sub>H<sub>5</sub>]<sup>+</sup> Calcd for C<sub>10</sub>H<sub>10</sub>BrO<sup>+</sup> 224.9910; Found 224.9919.

**IR** (neat) cm<sup>-1</sup> ν: 2163 (w), 1590 (w), 1484 (m), 1461 (w), 1392 (w), 1286 (w), 1166 (w), 1095 (m), 1057 (s), 1010 (s), 910 (m), 823 (s), 727 (m).

### 2-([1,1'-biphenyl]-4-yl)-2-ethyltetrahydrofuran (**5g**)



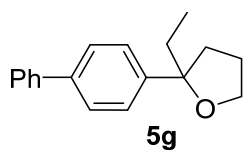

According to the general procedure for the copper-catalyzed methylative cycloetherification of alkenes. The crude product was purified by flash column chromatography on silica gel (PE/EtOAc = 15/1) to afford **5g** (38.5 mg, 76% yield) as a white solid.

MP: 37–39 °C

**<sup>1</sup>H NMR** (400 MHz, CDCl<sub>3</sub>)  $\delta$  7.62 (d,  $J$  = 7.1 Hz, 2H), 7.57 (d,  $J$  = 8.2 Hz, 2H), 7.49–7.40 (m, 4H), 7.34 (t,  $J$  = 7.4 Hz, 1H), 4.01 (q,  $J$  = 7.4 Hz, 1H), 3.93 (td,  $J$  = 8.0, 5.8 Hz, 1H), 2.23 (ddd,  $J$  = 12.6, 8.0, 5.0 Hz, 1H), 2.12–2.05 (m, 1H), 2.01–1.93 (m, 1H), 1.94–1.77 (m, 3H), 0.83 (t,  $J$  = 7.4 Hz, 3H).

**<sup>13</sup>C NMR** (101 MHz, CDCl<sub>3</sub>)  $\delta$  145.9, 141.1, 139.2, 128.8, 127.2, 127.1, 126.8, 126.0, 87.2, 67.6, 37.9, 35.2, 25.8, 9.0.

**HRMS** (APPI)  $m/z$ : [M–C<sub>2</sub>H<sub>5</sub>]<sup>+</sup> Calcd for C<sub>16</sub>H<sub>15</sub>O<sup>+</sup> 223.1117; Found 223.1117.

**IR** (neat) cm<sup>-1</sup>  $\nu$ : 1497 (s), 1425 (s), 1419 (s), 1304 (s), 1219 (s), 1143 (s), 1072 (m), 1024 (s), 953 (m), 889 (m), 815 (w), 742 (w).

#### 2-ethyl-2-(4-isopropylphenyl)tetrahydrofuran (**5h**)

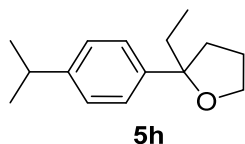

According to the general procedure for the copper-catalyzed methylative cycloetherification of alkenes. The crude product was purified by flash column chromatography on silica gel (PE/EtOAc = 15/1) to afford **5h** (31.8 mg, 73% yield) as a colorless oil.

**<sup>1</sup>H NMR** (400 MHz, CDCl<sub>3</sub>)  $\delta$  7.29 (d,  $J$  = 8.2 Hz, 2H), 7.20 (d,  $J$  = 8.1 Hz, 2H), 4.09–3.94 (m, 1H), 3.92–3.87 (m, 1H), 2.92 (hept,  $J$  = 6.9 Hz, 1H), 2.20 (ddd,  $J$  = 12.6, 8.0, 5.0 Hz, 1H), 2.09–2.01 (m, 1H), 2.00–1.89 (m, 1H), 1.91–1.73 (m, 3H), 1.28 (d,  $J$  = 7.0 Hz, 6H), 0.80 (t,  $J$  = 7.4 Hz, 3H).

**<sup>13</sup>C NMR** (101 MHz, CDCl<sub>3</sub>)  $\delta$  146.7, 144.0, 126.0, 125.4, 87.2, 67.5, 37.7, 35.3, 33.8, 25.8, 24.17, 24.15, 9.0.

**HRMS** (APPI)  $m/z$ : [M–C<sub>2</sub>H<sub>5</sub>]<sup>+</sup> Calcd for C<sub>13</sub>H<sub>17</sub>O<sup>+</sup> 189.1274; Found 189.1273.

**IR** (neat) cm<sup>-1</sup>  $\nu$ : 2023 (w), 1509 (w), 1461 (w), 1411 (w), 1363 (w), 1282 (w), 1160 (m), 1107 (m), 1055 (s), 1052 (s), 938 (w), 829 (s), 782 (w), 714 (w), 692 (w).

### 2-ethyl-2-(m-tolyl)tetrahydrofuran (**5i**)

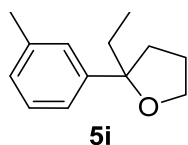

According to the general procedure for the copper-catalyzed methylative cycloetherification of alkenes. The crude product was purified by flash column chromatography on silica gel (PE/EtOAc = 15/1) to afford **5i** (30.2 mg, 79% yield) as a colorless oil.

**<sup>1</sup>H NMR** (400 MHz, CDCl<sub>3</sub>)  $\delta$  7.21 (t,  $J$  = 7.6 Hz, 1H), 7.18 (s, 1H), 7.14 (d,  $J$  = 7.8 Hz, 1H), 7.03 (d,  $J$  = 7.4 Hz, 1H), 3.97 (q,  $J$  = 7.3 Hz, 1H), 3.92–3.86 (m, 1H), 2.36 (s, 3H), 2.17 (ddd,  $J$  = 12.6, 8.1, 5.2 Hz, 1H), 2.07–2.00 (m, 1H), 1.98–1.88 (m, 1H), 1.85–1.74 (m, 3H), 0.77 (t,  $J$  = 7.4 Hz, 3H).

**<sup>13</sup>C NMR** (101 MHz, CDCl<sub>3</sub>)  $\delta$  146.7, 137.5, 127.9, 127.1, 126.2, 122.6, 87.2, 67.6, 37.8, 35.2, 25.8, 21.8, 8.9.

**HRMS** (APPI)  $m/z$ : [M-C<sub>2</sub>H<sub>5</sub>]<sup>+</sup> Calcd for C<sub>11</sub>H<sub>13</sub>O<sup>+</sup> 161.0961; Found 161.0961.

**IR** (neat) cm<sup>-1</sup>  $\nu$ : 2023 (w), 1607 (w), 1487 (w), 1459 (w), 1377 (w), 1281 (w), 1165 (m), 1121 (m), 1056 (s), 1040 (s), 910 (m), 784 (s), 722 (s).

### 2-ethyl-2-(3-methoxyphenyl)tetrahydrofuran (**5j**)

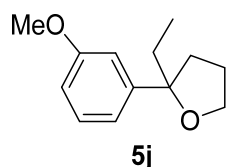

According to the general procedure for the copper-catalyzed methylative cycloetherification of alkenes. The crude product was purified by flash column chromatography on silica gel (PE/EtOAc = 15/1) to afford **5j** (25.3 mg, 61% yield) as a colorless oil.

**<sup>1</sup>H NMR** (400 MHz, CDCl<sub>3</sub>)  $\delta$  7.26 (t,  $J$  = 7.9 Hz, 1H), 6.98 (brs, 1H), 6.94 (dt,  $J$  = 7.8, 1.3 Hz, 1H), 6.78 (ddd,  $J$  = 8.2, 2.6, 1.1 Hz, 1H), 3.99 (q,  $J$  = 7.4 Hz, 1H), 3.91 (td,  $J$  = 8.0, 5.7 Hz, 1H), 3.84 (s, 3H), 2.19 (ddd,  $J$  = 12.5, 8.0, 4.9 Hz, 1H), 2.08–2.01 (m, 1H), 1.99–1.88 (m, 1H), 1.87–1.76 (m, 3H), 0.79 (t,  $J$  = 7.4 Hz, 3H).

**<sup>13</sup>C NMR** (101 MHz, CDCl<sub>3</sub>)  $\delta$  159.5, 148.7, 129.0, 118.0, 111.6, 111.4, 87.2, 67.6, 55.3, 37.9, 35.2, 25.8, 8.9.

**HRMS** (APPI)  $m/z$ : [M-C<sub>2</sub>H<sub>5</sub>]<sup>+</sup> Calcd for C<sub>11</sub>H<sub>13</sub>O<sub>2</sub><sup>+</sup> 177.0910; Found 177.0909.

**IR** (neat)  $\text{cm}^{-1}$   $\nu$ : 1600 (w), 1582 (w), 1485 (w), 1463 (w), 1434 (w), 1315 (w), 1285 (m), 1255 (m), 1166 (w), 1118 (w), 1048 (s), 928 (w), 876 (w), 821 (w), 779 (m), 734 (m), 723 (m).

### 2-(3-chlorophenyl)-2-ethyltetrahydrofuran (**5k**)

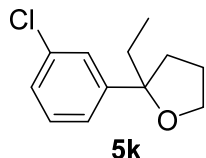

According to the general procedure for the copper-catalyzed methylative cycloetherification of alkenes. The crude product was purified by flash column chromatography on silica gel (PE/EtOAc = 15/1) to afford **5k** (28.7 mg, 68% yield) as a colorless oil.

**<sup>1</sup>H NMR** (400 MHz,  $\text{CDCl}_3$ )  $\delta$  7.29 (t,  $J$  = 1.8 Hz, 1H), 7.18–7.13 (m, 2H), 7.13–7.08 (m, 1H), 3.92–3.85 (m, 1H), 3.80 (td,  $J$  = 8.0, 5.6 Hz, 1H), 2.00–1.93 (m, 1H), 1.91–1.81 (m, 1H), 1.92–1.80 (m, 1H), 1.77–1.64 (m, 3H), 0.68 (t,  $J$  = 7.4 Hz, 3H).

**<sup>13</sup>C NMR** (101 MHz,  $\text{CDCl}_3$ )  $\delta$  149.1, 134.1, 129.4, 126.5, 125.8, 123.7, 86.9, 67.7, 38.0, 35.1, 25.7, 8.8.

**HRMS** (APPI)  $m/z$ :  $[\text{M}-\text{C}_2\text{H}_5]^+$  Calcd for  $\text{C}_{10}\text{H}_{10}\text{ClO}^+$  181.0415; Found 181.0415.

**IR** (neat)  $\text{cm}^{-1}$   $\nu$ : 1596 (w), 1571 (w), 1465 (w), 1421 (w), 1282 (w), 1223 (w), 1164 (w), 1117 (m), 1062 (m), 1037 (s), 924 (w), 781 (s), 700 (s).

### 2-(3,5-dimethylphenyl)-2-ethyltetrahydrofuran (**5l**)

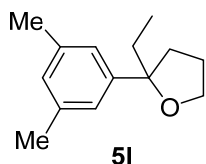

According to the general procedure for the copper-catalyzed methylative cycloetherification of alkenes. The crude product was purified by flash column chromatography on silica gel (PE/EtOAc = 15/1) to afford **5l** (26.3 mg, 64% yield) as a colorless oil.

**<sup>1</sup>H NMR** (400 MHz,  $\text{CDCl}_3$ )  $\delta$  6.97 (s, 2H), 6.86 (s, 1H), 3.96 (q,  $J$  = 7.3 Hz, 1H), 3.89 (td,  $J$  = 8.0, 5.8 Hz, 1H), 2.32 (s, 6H), 2.16 (ddd,  $J$  = 11.9, 8.2, 5.2 Hz, 1H), 2.06–1.97 (m, 1H), 1.96–1.88 (m, 1H), 1.84–1.76 (m, 3H), 0.78 (t,  $J$  = 7.4 Hz, 3H).

**<sup>13</sup>C NMR** (101 MHz,  $\text{CDCl}_3$ )  $\delta$  146.8, 137.4, 128.0, 123.3, 87.2, 67.6, 37.8, 35.2, 25.8, 21.3, 9.0.

**HRMS** (APPI)  $m/z$ :  $[\text{M}-\text{C}_2\text{H}_5]^+$  Calcd for  $\text{C}_{12}\text{H}_{15}\text{O}^+$  175.1117; Found 175.1117.

**IR** (neat)  $\text{cm}^{-1}$   $\nu$ : 2357 (w), 2341 (w), 2274 (w), 2160 (m), 2022 (w), 1604 (w), 1459 (m), 1378 (w), 1162 (m), 1057 (s), 1038 (s), 848 (s), 761 (m), 721 (s).

#### 4-(2-ethyltetrahydrofuran-2-yl)benzonitrile (**5m**)

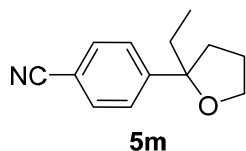

According to the general procedure for the copper-catalyzed methylative cycloetherification of alkenes. The crude product was purified by flash column chromatography on silica gel (PE/EtOAc = 15/1) to afford **5m** (30.2 mg, 75% yield) as a colorless oil.

**<sup>1</sup>H NMR** (400 MHz,  $\text{CDCl}_3$ )  $\delta$  7.60 (d,  $J$  = 8.0 Hz, 2H), 7.46 (d,  $J$  = 8.1 Hz, 2H), 3.98 (q,  $J$  = 7.5 Hz, 1H), 3.90-3.83 (m, 1H), 2.10 (t,  $J$  = 7.3 Hz, 2H), 2.01-1.90 (m, 1H), 1.81 (q,  $J$  = 7.2 Hz, 2H), 1.78-1.70 (m, 3H), 0.73 (t,  $J$  = 7.4 Hz, 3H).

**<sup>13</sup>C NMR** (101 MHz,  $\text{CDCl}_3$ )  $\delta$  152.5, 131.9, 126.2, 119.1, 110.2, 86.9, 67.8, 38.0, 34.8, 25.6, 8.6.

**HRMS** (APCI)  $m/z$ :  $[\text{M} + \text{H}]^+$  Calcd for  $\text{C}_{13}\text{H}_{16}\text{NO}^+$  202.1226; Found 202.1223.

**IR** (neat)  $\text{cm}^{-1}$   $\nu$ : 2952 (s), 2250 (w), 2152 (w), 2015 (w), 1783 (w), 1590 (w), 1479 (m), 1420 (m), 1351 (m), 1143 (m), 1113 (s), 989 (s), 920 (s), 817 (s).

#### 2-ethyl-2-phenyltetrahydro-2H-pyran (**5n**)

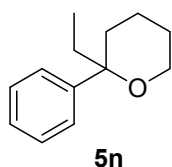

According to the general procedure for the copper-catalyzed methylative cycloetherification of alkenes. The crude product was purified by flash column chromatography on silica gel (PE/EtOAc = 15/1) to afford **5n** (28.9 mg, 76% yield) as a colorless oil.

**<sup>1</sup>H NMR** (400 MHz,  $\text{CDCl}_3$ )  $\delta$  7.47-7.31 (m, 4H), 7.30-7.24 (m, 1H), 3.82-3.64 (m, 1H), 3.56-3.48 (m, 1H), 2.36-2.29 (m, 1H), 1.85-1.59 (m, 5H), 1.58-1.34 (m, 2H), 0.69 (t,  $J$  = 7.5 Hz, 3H).

**<sup>13</sup>C NMR** (101 MHz,  $\text{CDCl}_3$ )  $\delta$  143.4, 128.3, 127.1, 126.5, 78.8, 62.7, 37.6, 32.7, 26.4, 20.0, 7.8.

**HRMS** (APPI)  $m/z$ :  $[\text{M} - \text{C}_2\text{H}_5]^+$  Calcd for  $\text{C}_{11}\text{H}_{13}\text{O}^+$  161.0961; Found 161.0967.

IR (neat)  $\text{cm}^{-1}$   $\nu$ : 2936 (w), 1450 (w), 1284 (w), 1178 (w), 1084 (s), 1049 (m), 997 (w), 889 (w), 758 (s), 702 (s).

### General procedure for the copper-catalyzed methylative lactonization of alkenes

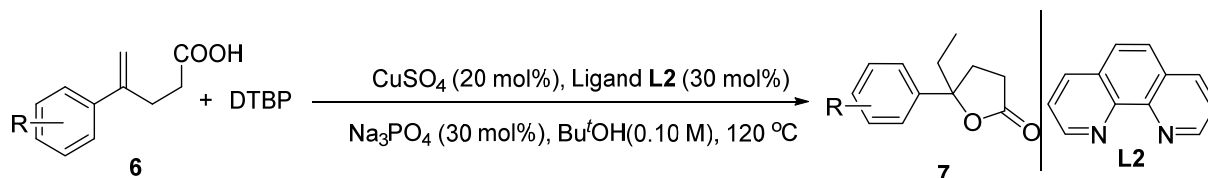

A screw cap tube was charged with  $\text{CuSO}_4$  (6.4 mg, 0.04 mmol, 0.2 equiv), 1,10-Phen **L2** (10.8 mg, 0.06 mmol, 0.03 equiv) and  $\text{CF}_3\text{CH}_2\text{OH}$  (2.0 mL). The mixture was stirred at room temperature for 30 minutes. Substrate **6** (0.2 mmol, 1.0 equiv),  $\text{Na}_3\text{PO}_4$  (9.8 mg, 0.06 mmol, 0.3 equiv) and DTBP (0.15 mL, 4.0 equiv) were added to the above mixture, and the reaction mixture was stirred at  $120^\circ\text{C}$  for 6 hours under  $\text{N}_2$  atmosphere. The reaction was quenched with water, and extracted with EtOAc. The organic extracts were washed with brine, dried over  $\text{Na}_2\text{SO}_4$ . The solvent was removed under reduced pressure. The residue was purified by flash chromatography to give **7**.

### Characterization of compounds **7**

#### 5-(4-chlorophenyl)-5-ethylidihydrofuran-2(3H)-one (**7a**)

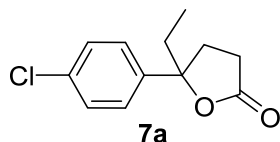

According to the general procedure for the copper-catalyzed methylative lactonization of alkenes. The crude product was purified by flash column chromatography on silica gel (PE/EtOAc = 4/1) to afford **7a** (34.2 mg, 76% yield) as a colorless oil.

$^1\text{H NMR}$  (400 MHz,  $\text{CDCl}_3$ )  $\delta$  7.36 (d,  $J = 8.6$  Hz, 2H), 7.29 (d,  $J = 8.7$  Hz, 2H), 2.68–2.54 (m, 1H), 2.55–2.38 (m, 3H), 1.99 (q,  $J = 7.4$  Hz, 2H), 0.83 (t,  $J = 7.4$  Hz, 3H).

$^{13}\text{C NMR}$  (101 MHz,  $\text{CDCl}_3$ )  $\delta$  176.4, 141.4, 133.6, 128.8, 126.4, 89.4, 35.3, 34.6, 28.8, 8.3.

HRMS (ESI)  $m/z$ :  $[\text{M} + \text{Na}]^+$  Calcd for  $\text{C}_{12}\text{H}_{13}\text{ClNaO}_2^+$  247.0496; Found 247.0498.

IR (neat)  $\text{cm}^{-1}$   $\nu$ : 1771 (s), 1492 (w), 1463 (w), 1292 (w), 1229 (w), 1194 (m), 1118 (w), 1091 (m), 1013 (m), 962 (s), 914 (m), 829 (s), 723 (w).

#### 5-ethyl-5-(p-tolyl)dihydrofuran-2(3H)-one (**7b**)

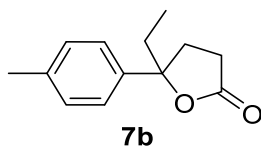

According to the general procedure for the copper-catalyzed methylative lactonization of alkenes. The crude product was purified by flash column chromatography on silica gel (PE/EtOAc = 8/1) to afford **7b** (26.8 mg, 66% yield) as a colorless oil.

**<sup>1</sup>H NMR** (400 MHz, CDCl<sub>3</sub>) δ 7.21 (d, *J* = 8.4 Hz, 2H), 7.17 (d, *J* = 8.2 Hz, 2H), 2.62–2.51 (m, 1H), 2.50–2.37 (m, 3H), 2.34 (s, 3H), 1.97 (q, *J* = 7.4 Hz, 2H), 0.81 (t, *J* = 7.4 Hz, 3H).

**<sup>13</sup>C NMR** (101 MHz, CDCl<sub>3</sub>) δ 176.9, 139.8, 137.3, 129.2, 124.8, 90.1, 35.4, 34.7, 28.9, 21.1, 8.4.

**HRMS** (ESI) *m/z*: [M + H]<sup>+</sup> Calcd for C<sub>12</sub>H<sub>14</sub>BrO<sub>2</sub><sup>+</sup> 269.0172; Found 269.0168.

**IR** (neat) cm<sup>-1</sup> ν: 2159 (w), 1758 (w), 1612 (w), 1513 (s), 1465 (w), 1305 (w), 1251 (s), 1177 (s), 1033 (m), 833 (s), 677 (w).

#### 5-ethyl-5-(4-methoxyphenyl)dihydrofuran-2(3H)-one (**7c**)

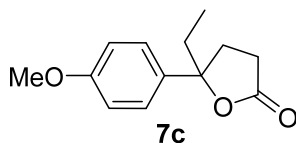

According to the general procedure for the copper-catalyzed methylative lactonization of alkenes. The crude product was purified by flash column chromatography on silica gel (PE/EtOAc = 3/1) to afford **7c** (23.9 mg, 54% yield) as a colorless oil.

**<sup>1</sup>H NMR** (400 MHz, CDCl<sub>3</sub>) δ 7.24 (d, *J* = 8.9 Hz, 2H), 6.88 (d, *J* = 8.8 Hz, 2H), 3.80 (s, 4H), 2.63–2.50 (m, 1H), 2.53–2.29 (m, 3H), 1.96 (q, *J* = 7.4 Hz, 2H), 0.80 (t, *J* = 7.4 Hz, 3H).

**<sup>13</sup>C NMR** (101 MHz, CDCl<sub>3</sub>) δ 176.9, 159.0, 134.7, 126.1, 113.9, 90.0, 55.4, 35.4, 34.6, 28.9, 8.4.

**HRMS** (ESI) *m/z*: [M + Na]<sup>+</sup> Calcd for C<sub>13</sub>H<sub>16</sub>NaO<sub>3</sub><sup>+</sup> 243.0992; Found 243.0997.

**IR** (neat) cm<sup>-1</sup> ν: 1770 (s), 1613 (w), 1514 (m), 1463 (w), 1304 (w), 1251 (s), 1179 (s), 1136 (w), 1103 (w), 1031 (m), 960 (m), 914 (m), 832 (s), 788 (w), 670 (w).

#### 5-ethyl-5-(4-fluorophenyl)dihydrofuran-2(3H)-one (**7d**)

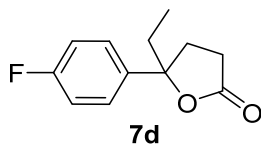

According to the general procedure for the copper-catalyzed methylative lactonization of alkenes. The crude product was purified by flash column chromatography on silica gel (PE/EtOAc = 4/1) to afford **7d** (28.7 mg, 69% yield) as a colorless oil.

**<sup>1</sup>H NMR** (400 MHz, CDCl<sub>3</sub>) δ 7.33–7.26 (m, 2H), 7.09–7.00 (m, 2H), 2.64–2.53 (m, 1H), 2.51–2.38 (m, 3H), 1.96 (q, *J* = 7.4 Hz, 2H), 0.80 (t, *J* = 7.4 Hz, 3H).

**<sup>13</sup>C NMR** (101 MHz, CDCl<sub>3</sub>) δ 176.5, 162.2 (d, *J* = 246.5 Hz), 138.6 (d, *J* = 3.3 Hz), 126.6 (d, *J* = 8.1 Hz), 115.5 (d, *J* = 21.3 Hz), 89.6, 35.4, 34.6, 28.8, 8.3.

**HRMS** (ESI) *m/z*: [M + Na]<sup>+</sup> Calcd for C<sub>12</sub>H<sub>13</sub>FNaO<sub>2</sub><sup>+</sup> 231.0792; Found 231.0795.

**IR** (neat) cm<sup>-1</sup> ν: 1773 (s), 1603 (w), 1510 (s), 1460 (w), 1302 (w), 1226 (s), 1192 (s), 1162 (m), 1114 (m), 1030 (w), 967 (m), 915 (m), 837 (s).

#### 5-ethyl-5-phenyldihydrofuran-2(3H)-one (**7e**)

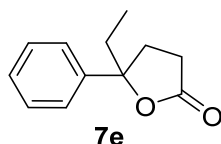

According to the general procedure for the copper-catalyzed methylative lactonization of alkenes. The crude product was purified by flash column chromatography on silica gel (PE/EtOAc = 4/1) to afford **7e** (24.2 mg, 63% yield) as a colorless oil.

**<sup>1</sup>H NMR** (400 MHz, CDCl<sub>3</sub>) δ 7.32–7.29 (m, 1H), 7.29 – 7.26 (m, 2H), 7.26 – 7.18 (m, 2H), 2.56 – 2.45 (m, 1H), 2.45 – 2.32 (m, 3H), 1.92 (q, *J* = 7.4 Hz, 2H), 0.75 (t, *J* = 7.4 Hz, 3H).

**<sup>13</sup>C NMR** (101 MHz, CDCl<sub>3</sub>) δ 176.8, 142.8, 128.6, 127.6, 124.8, 90.0, 35.4, 34.7, 28.9, 8.4.

**HRMS** (ESI) *m/z*: [M + Na]<sup>+</sup> Calcd for C<sub>12</sub>H<sub>13</sub>ClNaO<sub>2</sub><sup>+</sup> 247.0496; Found 247.0498.

**IR** (neat) cm<sup>-1</sup> ν: 1770 (s), 1448 (w), 1318 (w), 1248 (w), 1232 (w), 1194 (m), 1135 (w), 1110 (m), 1028 (w), 962 (m), 920 (m), 765 (s), 701 (s).

#### 5-(4-bromophenyl)-5-ethyldihydrofuran-2(3H)-one (**7f**)

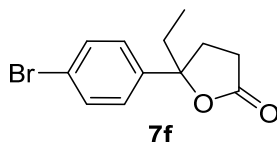

According to the general procedure for the copper-catalyzed methylative lactonization of alkenes. The crude product was purified by flash column chromatography on silica gel (PE/EtOAc = 4/1) to afford **7f** (33.5 mg, 62% yield) as a colorless oil.

**<sup>1</sup>H NMR** (400 MHz, CDCl<sub>3</sub>)  $\delta$  7.49 (d,  $J$  = 8.6 Hz, 2H), 7.20 (d,  $J$  = 8.6 Hz, 2H), 2.69–2.52 (m, 1H), 2.51–2.32 (m, 3H), 1.96 (q,  $J$  = 7.4 Hz, 2H), 0.80 (t,  $J$  = 7.4 Hz, 3H).

**<sup>13</sup>C NMR** (101 MHz, CDCl<sub>3</sub>)  $\delta$  176.4, 142.0, 131.7, 126.7, 121.7, 89.4, 35.2, 34.6, 28.8, 8.3.

**HRMS** (ESI/QTOF)  $m/z$ : [M + H]<sup>+</sup> Calcd for C<sub>12</sub>H<sub>14</sub>BrO<sub>2</sub><sup>+</sup> 269.0172; Found 269.0168.

**IR** (neat) cm<sup>-1</sup>  $\nu$ : 1771 (s), 1488 (w), 1463 (w), 1396 (w), 1230 (w), 1195 (m), 1115 (w), 1100 (w), 1009 (m), 961 (m), 913 (m), 910 (m), 824 (m), 722 (w).

### 5-([1,1'-biphenyl]-4-yl)-5-ethylidihydrofuran-2(3H)-one (**7g**)

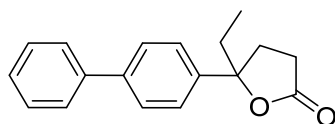

**7g**

According to the general procedure for the copper-catalyzed methylative lactonization of alkenes. The crude product was purified by flash column chromatography on silica gel (PE/EtOAc = 5/1) to afford **7g** (42.3 mg, 79% yield) as a white solid.

**MP**: 88–89 °C.

**<sup>1</sup>H NMR** (400 MHz, CDCl<sub>3</sub>)  $\delta$  7.65–7.54 (m, 4H), 7.49–7.39 (m, 4H), 7.39–7.32 (m, 1H), 2.67–2.41 (m, 4H), 2.04 (q,  $J$  = 7.4 Hz, 2H), 0.87 (t,  $J$  = 7.4 Hz, 3H).

**<sup>13</sup>C NMR** (101 MHz, CDCl<sub>3</sub>)  $\delta$  176.8, 141.8, 140.5, 140.5, 128.9, 127.6, 127.3, 127.2, 125.4, 89.9, 35.4, 34.7, 28.9, 8.4.

**HRMS** (ESI)  $m/z$ : [M + H]<sup>+</sup> Calcd for C<sub>18</sub>H<sub>19</sub>O<sub>2</sub><sup>+</sup> 267.1380; Found 267.1382.

**IR** (neat) cm<sup>-1</sup>  $\nu$ : 1764 (s), 1489 (w), 1463 (w), 1401 (w), 1232 (w), 1193 (m), 1137 (w), 1104 (m), 1006 (w), 961 (m), 916 (m), 914 (m), 836 (m), 762 (s), 728 (s), 692 (s).

### 5-ethyl-5-(4-isopropylphenyl)dihydrofuran-2(3H)-one (**7h**)

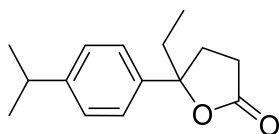

**7h**



According to the general procedure for the copper-catalyzed methylative lactonization of alkenes. The crude product was purified by flash column chromatography on silica gel (PE/EtOAc = 5/1) to afford **7h** (24.3 mg, 52% yield) as a colorless oil.

<sup>1</sup>H NMR (400 MHz, CDCl<sub>3</sub>) δ 7.46–7.00 (m, 4H), 2.83 (hept, *J* = 6.9 Hz, 1H), 2.55–2.44 (m, 1H), 2.44–2.26 (m, 3H), 1.91 (q, *J* = 7.4 Hz, 2H), 1.17 (d, *J* = 6.9 Hz, 6H), 0.75 (t, *J* = 7.4 Hz, 3H).

<sup>13</sup>C NMR (101 MHz, CDCl<sub>3</sub>) δ 176.9, 148.2, 140.1, 126.6, 124.8, 90.1, 35.4, 34.6, 33.8, 28.9, 24.0, 8.4

HRMS (ESI) *m/z*: [M + H]<sup>+</sup> Calcd for C<sub>12</sub>H<sub>14</sub>BrO<sub>2</sub><sup>+</sup> 269.0172; Found 269.0168.

IR (neat) cm<sup>-1</sup> ν: 1770 (s), 1463 (w), 1230 (w), 1187 (m), 1135 (w), 1107 (w), 1027 (w), 962 (m), 916 (w), 910 (w), 834 (m), 791 (w), 668 (w).

#### 4-(2-ethyl-5-oxotetrahydrofuran-2-yl)benzonitrile (**7i**)

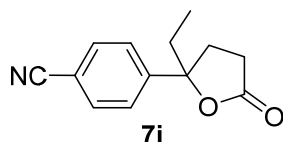

According to the general procedure for the copper-catalyzed methylative lactonization of alkenes. The crude product was purified by flash column chromatography on silica gel (PE/EtOAc = 5/1) to afford **7i** (35.1 mg, 82% yield) as a colorless oil.

<sup>1</sup>H NMR (400 MHz, CDCl<sub>3</sub>) δ 7.67 (d, *J* = 8.0 Hz, 2H), 7.46 (d, *J* = 8.0 Hz, 2H), 2.77 – 2.56 (m, 1H), 2.56 – 2.33 (m, 3H), 1.99 (q, *J* = 7.2 Hz, 2H), 0.80 (t, *J* = 7.4 Hz, 3H).

<sup>13</sup>C NMR (101 MHz, CDCl<sub>3</sub>) δ 175.7, 148.2, 132.4, 125.6, 118.4, 111.7, 88.9, 35.0, 34.4, 28.5, 8.1.

HRMS (APCI) *m/z*: [M + H]<sup>+</sup> Calcd for C<sub>13</sub>H<sub>14</sub>NO<sub>2</sub><sup>+</sup> 216.1019; Found 216.1019.

IR (neat) cm<sup>-1</sup> ν: 2975 (w), 2229 (w), 2158 (w), 1771 (s), 1610 (w), 1506 (w), 1460 (w), 1406 (w), 1345 (w), 1229 (m), 1192 (m), 1104 (m), 1030 (m), 965 (s), 915 (m), 839 (s).

#### *trans*-4-methyl-5-phenyldihydrofuran-2(3H)-one (**7j**)

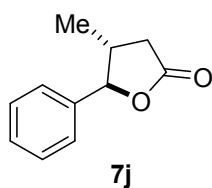

According to the general procedure for the copper-catalyzed methylative lactonization of alkenes. The crude product was purified by flash column chromatography on silica gel (PE/EtOAc = 4/1) to afford **7j** (28.7 mg, 41% yield) as a colorless oil. The physical and spectroscopic data were in accordance with those reported in the literature.<sup>7</sup>

<sup>1</sup>H NMR (400 MHz, CDCl<sub>3</sub>) δ 7.57 – 7.30 (m, 5H), 4.94 (d, *J* = 8.3 Hz, 1H), 2.79 (dd, *J* = 16.9, 7.7 Hz, 1H), 2.56 – 2.41 (m, 1H), 2.34 (dd, *J* = 16.9, 10.4 Hz, 1H), 1.20 (d, *J* = 6.5 Hz, 3H).

<sup>13</sup>C NMR (101 MHz, CDCl<sub>3</sub>) δ 176.2, 138.1, 128.9, 126.0, 88.3, 40.0, 37.4, 16.7.

### General procedure for the copper-catalyzed methylative cycloamination of alkenes

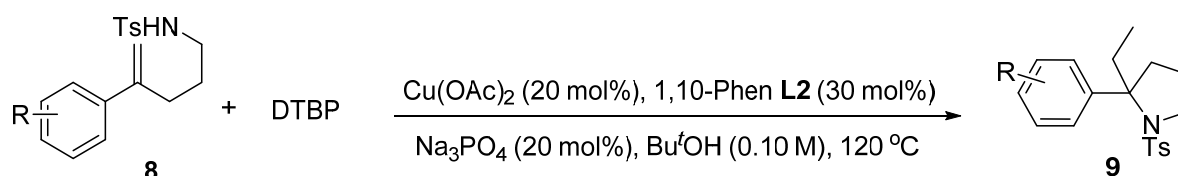

A screw cap tube was charged with Cu(OAc)<sub>2</sub> (7.3 mg, 0.04 mmol, 0.2 equiv), 1,10-Phen (10.8 mg, 0.06 mmol, 0.03 equiv) and <sup>t</sup>BuOH (2.0 mL). The mixture was stirred at room temperature for 30 minutes. Substrate **8** (0.2 mmol, 1.0 equiv), Na<sub>3</sub>PO<sub>4</sub> (6.5 mg, 0.04 mmol, 0.2 equiv) and DTBP (0.15 mL, 4.0 equiv) were added to the above mixture, and the reaction mixture was stirred for 3 hours at 120 °C under N<sub>2</sub> atmosphere. The reaction was quenched with water, and the mixture was extracted with EtOAc. The organic extracts were washed with brine, dried over Na<sub>2</sub>SO<sub>4</sub>. The solvent was removed under reduced pressure. The residue was purified by flash chromatography to give **9**.

### Characterization of compounds **9**

#### 2-ethyl-2-phenyl-1-tosylpyrrolidine (**9a**)

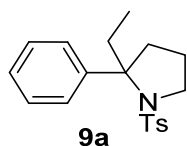

According to the general procedure for the copper-catalyzed methylative cycloamination of alkenes. The crude product was purified by flash column chromatography on silica gel (PE/EtOAc = 6/1) to afford **9a** (46.7 mg, 71% yield) as a colorless oil.

<sup>1</sup>H NMR (400 MHz, CDCl<sub>3</sub>) δ 7.36–7.27 (m, 4H), 7.24–7.18 (m, 3H), 7.12 (d, *J* = 7.8 Hz, 2H), 3.69–3.63 (m, 1H), 3.57 (ddd, *J* = 9.4, 7.4, 5.8 Hz, 1H), 2.53–2.40 (m, 2H), 2.39 (s, 3H), 2.21–2.14 (m, 2H), 1.97–1.83 (m, 2H), 0.99 (t, *J* = 7.3 Hz, 3H).

$^{13}\text{C}$  NMR (101 MHz,  $\text{CDCl}_3$ )  $\delta$  145.3, 142.4, 138.2, 129.1, 128.0, 127.1, 126.9, 126.8, 73.3, 50.4, 40.9, 31.3, 23.3, 21.6, 9.8.

HRMS (ESI)  $m/z$ :  $[\text{M} + \text{Na}]^+$  Calcd for  $\text{C}_{19}\text{H}_{23}\text{NNaO}_2\text{S}^+$  352.1342; Found 352.1345.

IR (neat)  $\text{cm}^{-1}$   $\nu$ : 1733 (w), 1589 (w), 1474 (w), 1393 (w), 1333 (m), 1148 (s), 1086(s), 1044 (m), 1009(s), 927 (w), 807(s), 706(m).

### 2-ethyl-2-(p-tolyl)-1-tosylpyrrolidine (**9b**)

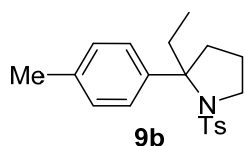

According to the general procedure for the copper-catalyzed methylative cycloamination of alkenes. The crude product was purified by flash column chromatography on silica gel (PE/EtOAc = 6/1) to afford **9b** (44.9 mg, 65% yield) as a colorless oil.

$^1\text{H}$  NMR (400 MHz,  $\text{CDCl}_3$ )  $\delta$  7.33 (d,  $J$  = 8.2 Hz, 2H), 7.20 (d,  $J$  = 8.1 Hz, 2H), 7.11 (d,  $J$  = 8.0 Hz, 2H), 7.01 (d,  $J$  = 7.9 Hz, 2H), 3.67–3.62 (m, 1H), 3.59–3.53 (m, 1H), 2.51–2.36 (m, 2H), 2.38 (s, 3H), 2.32 (s, 3H), 2.19–2.14 (m, 2H), 1.91–1.85 (m, 2H), 0.97 (t,  $J$  = 7.3 Hz, 3H).

$^{13}\text{C}$  NMR (101 MHz,  $\text{CDCl}_3$ )  $\delta$  142.3, 142.2, 138.3, 136.4, 129.0, 128.6, 127.1, 126.9, 73.1, 50.4, 40.8, 31.3, 23.3, 21.6, 21.0, 9.8.

HRMS (ESI)  $m/z$ :  $[\text{M} + \text{Na}]^+$  Calcd for  $\text{C}_{20}\text{H}_{25}\text{NNaO}_2\text{S}^+$  366.1498; Found 366.1500.

IR (neat)  $\text{cm}^{-1}$   $\nu$ : 1803 (w), 1434 (m), 1368 (m), 1296 (s), 1173 (s), 1126 (s), 1028 (s), 993 (s), 833 (s), 782 (s).

### 2-ethyl-2-(4-methoxyphenyl)-1-tosylpyrrolidine (**9c**)

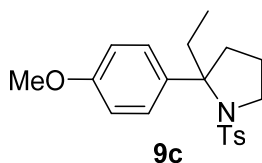

According to the general procedure for the copper-catalyzed methylative cycloamination of alkenes. The crude product was purified by flash column chromatography on silica gel (PE/EtOAc = 6/1) to afford **9c** (42.4 mg, 56% yield) as a colorless oil.

**<sup>1</sup>H NMR** (400 MHz, CDCl<sub>3</sub>)  $\delta$  7.30 (d,  $J$  = 8.0 Hz, 2H), 7.22 (d,  $J$  = 8.8 Hz, 2H), 7.10 (d,  $J$  = 8.0 Hz, 2H), 6.72 (d,  $J$  = 8.8 Hz, 2H), 3.80 (s, 3H), 3.68–3.62 (m, 1H), 3.59–3.49 (m, 1H), 2.47–2.39 (m, 2H), 2.37 (s, 3H), 2.16 (t,  $J$  = 7.3 Hz, 2H), 1.95–1.86 (m, 2H), 0.98 (t,  $J$  = 7.3 Hz, 3H).

**<sup>13</sup>C NMR** (101 MHz, CDCl<sub>3</sub>)  $\delta$  158.4, 142.3, 138.3, 137.1, 129.0, 128.2, 127.1, 113.2, 72.7, 55.4, 50.4, 40.8, 31.6, 23.4, 21.6, 9.8.

**HRMS** (ESI)  $m/z$ :  $[M + Na]^+$  Calcd for C<sub>20</sub>H<sub>25</sub>NNaO<sub>3</sub>S<sup>+</sup> 382.1447; Found 382.1445.

**IR** (neat) cm<sup>-1</sup>  $\nu$ : 1610 (w), 1513 (m), 1463 (w), 1325 (m), 1253 (m), 1188 (m), 1154 (s), 1093 (s), 1029 (m), 1008 (m), 818 (m), 721 (m).

### 2-ethyl-2-(4-fluorophenyl)-1-tosylpyrrolidine (**9d**)

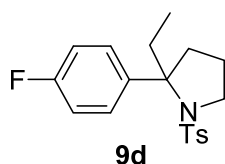

According to the general procedure for the copper-catalyzed methylative cycloamination of alkenes. The crude product was purified by flash column chromatography on silica gel (PE/EtOAc = 6/1) to afford **9d** (45.8 mg, 66% yield) as a white solid.

**MP**: 63–64 °C

**<sup>1</sup>H NMR** (400 MHz, CDCl<sub>3</sub>)  $\delta$  7.26 (d,  $J$  = 7.9 Hz, 2H), 7.22–7.19 (m, 2H), 7.07 (d,  $J$  = 8.0 Hz, 2H), 6.80 (t,  $J$  = 8.7 Hz, 2H), 3.61–3.55 (m, 1H), 3.53–3.46 (m, 1H), 2.44–2.25 (m, 2H), 2.31 (s, 3H), 2.15–2.01 (m, 2H), 1.91–1.75 (m, 2H), 0.90 (t,  $J$  = 7.3 Hz, 3H).

**<sup>13</sup>C NMR** (101 MHz, CDCl<sub>3</sub>)  $\delta$  161.7 (d,  $J$  = 245.7 Hz), 142.6, 141.1 (d,  $J$  = 3.3 Hz), 138.1, 128.6 (d,  $J$  = 8.0 Hz), 127.0, 114.6 (d,  $J$  = 21.2 Hz), 72.7, 50.4, 40.9, 31.4, 23.2, 21.6, 9.7.

**HRMS** (ESI)  $m/z$ :  $[M + H]^+$  Calcd for C<sub>19</sub>H<sub>23</sub>FNO<sub>2</sub>S<sup>+</sup> 348.1428; Found 348.1429.

**IR** (neat) cm<sup>-1</sup>  $\nu$ : 1602 (w), 1510 (m), 1470 (w), 1331 (s), 1306 (w), 1224 (m), 1151 (s), 1093 (m), 1049 (w), 1008 (m), 873 (w), 823 (m), 807 (m), 707 (m).

### 2-(4-chlorophenyl)-2-ethyl-1-tosylpyrrolidine (**9e**)

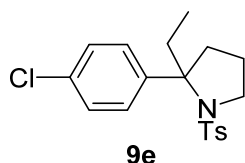

According to the general procedure for the copper-catalyzed methylative cycloamination of alkenes. The crude product was purified by flash column chromatography on silica gel (PE/EtOAc = 6/1) to afford **7e** (53.2 mg, 73% yield) as a white solid.

**MP:** 102–103 °C

**<sup>1</sup>H NMR** (400 MHz, CDCl<sub>3</sub>)  $\delta$  7.27 (d, *J* = 8.1 Hz, 2H), 7.16 (d, *J* = 8.8 Hz, 2H), 7.11–7.02 (m, 4H), 3.61–3.55 (m, 1H), 3.54–3.48 (m, 1H), 2.43–2.23 (m, 2H), 2.32 (s, 3H), 2.15–2.08 (m, 1H), 2.06–1.96 (m, 1H), 1.91–1.77 (m, 2H), 0.89 (t, *J* = 7.3 Hz, 3H).

**<sup>13</sup>C NMR** (101 MHz, CDCl<sub>3</sub>)  $\delta$  144.0, 142.7, 138.1, 132.7, 129.2, 128.3, 128.0, 127.0, 72.6, 50.5, 40.9, 31.2, 23.2, 21.6, 9.7.

**HRMS** (ESI) *m/z*: [M + H]<sup>+</sup> Calcd for C<sub>19</sub>H<sub>23</sub>ClNO<sub>2</sub>S<sup>+</sup> 364.1133; Found 364.1128.

**IR** (neat) cm<sup>-1</sup>  $\nu$ : 1597 (w), 1492 (w), 1401 (w), 1330 (s), 1210 (w), 1152 (s), 1091 (s), 1046 (m), 1008 (s), 866 (w), 811 (s), 720 (m).

### 2-(4-bromophenyl)-2-ethyl-1-tosylpyrrolidine (**9f**)

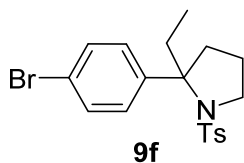

According to the general procedure for the copper-catalyzed methylative cycloamination of alkenes. The crude product was purified by flash column chromatography on silica gel (PE/EtOAc = 6/1) to afford **7f** (51.6 mg, 63% yield) as a colorless oil.

**<sup>1</sup>H NMR** (400 MHz, CDCl<sub>3</sub>)  $\delta$  7.37–7.32 (m, 2H), 7.32–7.27 (m, 2H), 7.21–7.13 (m, 4H), 3.69–3.63 (m, 1H), 3.61–3.56 (m, 1H), 2.53–2.29 (m, 2H), 2.39 (s, 3H), 2.22–2.15 (m, 1H), 2.13–2.06 (m, 1H), 1.99–1.82 (m, 2H), 0.96 (t, *J* = 7.3 Hz, 3H).

**<sup>13</sup>C NMR** (101 MHz, CDCl<sub>3</sub>)  $\delta$  144.5, 142.7, 138.0, 131.0, 129.2, 128.7, 127.0, 120.9, 72.6, 50.5, 40.9, 31.1, 23.2, 21.6, 9.7.

**HRMS** (ESI) *m/z*: [M + H]<sup>+</sup> Calcd for C<sub>19</sub>H<sub>23</sub>BrNO<sub>2</sub>S<sup>+</sup> 408.0627; Found 408.0629.

**IR** (neat) cm<sup>-1</sup>  $\nu$ : 2160 (w), 1735 (w), 1597 (w), 1488 (w), 1329 (s), 1209 (w), 1151 (s), 1089 (s), 1005 (s), 865 (m), 810 (s), 709 (m).

### 2-([1,1'-biphenyl]-4-yl)-2-ethyl-1-tosylpyrrolidine (**9g**)

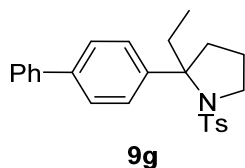

According to the general procedure for the copper-catalyzed methylative cycloamination of alkenes. The crude product was purified by flash column chromatography on silica gel (PE/EtOAc = 8/1) to afford **7g** (51.6 mg, 64% yield) as a colorless oil.

**<sup>1</sup>H NMR** (400 MHz, CDCl<sub>3</sub>) δ 7.58 (d, *J* = 7.2 Hz, 2H), 7.48–7.41 (m, 4H), 7.39–7.31 (m, 5H), 7.09 (d, *J* = 8.0 Hz, 2H), 3.75–3.70 (m, 1H), 3.66–3.60 (m, 1H), 2.59–2.50 (m, 1H), 2.48–2.41 (m, 1H), 2.35 (s, 3H), 2.25–2.20 (m, 2H), 2.04–1.89 (m, 2H), 1.03 (t, *J* = 7.3 Hz, 3H).

**<sup>13</sup>C NMR** (101 MHz, CDCl<sub>3</sub>) δ 144.2, 142.3, 140.8, 139.6, 138.2, 129.1, 128.9, 127.42, 127.36, 127.1, 127.0, 126.6, 72.8, 50.6, 41.0, 31.3, 23.4, 21.5, 9.8.

**HRMS** (ESI) *m/z*: [M + Na]<sup>+</sup> Calcd for C<sub>25</sub>H<sub>27</sub>NNaO<sub>2</sub>S<sup>+</sup> 428.1655; Found 428.1655.

**IR** (neat) cm<sup>-1</sup> ν: 1730 (w), 1596 (w), 1486 (w), 1470 (w), 1397 (w), 1329 (m), 1151 (s), 1089 (s), 1046 (m), 1006 (s), 924 (w), 809 (s), 709 (m).

#### 2-ethyl-2-(4-isopropylphenyl)-1-tosylpyrrolidine (**9h**)

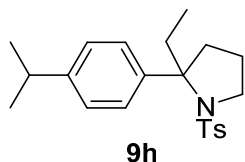

According to the general procedure for the copper-catalyzed methylative cycloamination of alkenes. The crude product was purified by flash column chromatography on silica gel (PE/EtOAc = 8/1) to afford **9h** (40.3 mg, 62% yield) as a colorless oil.

**<sup>1</sup>H NMR** (400 MHz, CDCl<sub>3</sub>) δ 7.21 – 7.09 (m, 4H), 7.02–6.94 (m, 4H), 3.64–3.59 (m, 1H), 3.52–3.45 (m, 1H), 2.83–2.76 (m, 1H), 2.48–2.39 (m, 1H), 2.37–2.30 (m, 1H), 2.29 (s, 3H), 2.11 (t, *J* = 7.3 Hz, 2H), 1.89–1.80 (m, 2H), 1.18 (d, *J* = 7.0 Hz, 3H), 1.17 (d, *J* = 7.0 Hz, 3H), 0.93 (t, *J* = 7.3 Hz, 3H).

**<sup>13</sup>C NMR** (101 MHz, CDCl<sub>3</sub>) δ 147.3, 142.2, 142.1, 138.2, 129.0, 127.1, 127.0, 126.0, 72.7, 50.5, 41.0, 33.7, 31.5, 24.2, 24.1, 23.5, 21.6, 9.8.

**HRMS** (ESI) *m/z*: [M + Na]<sup>+</sup> Calcd for C<sub>22</sub>H<sub>29</sub>NNaO<sub>2</sub>S<sup>+</sup> 394.1811; Found 394.1813.

**IR** (neat) cm<sup>-1</sup> ν: 1599 (w), 1463 (w), 1335 (m), 1221 (w), 1154 (s), 1093 (s), 1053 (m), 1007 (m), 865 (w), 815 (m), 709 (w).

### 2-ethyl-2-(m-tolyl)-1-tosylpyrrolidine (**9i**)

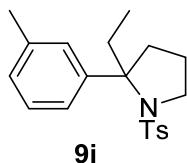

According to the general procedure for the copper-catalyzed methylative cycloamination of alkenes. The crude product was purified by flash column chromatography on silica gel (PE/EtOAc = 6/1) to afford **9i** (41.8 mg, 61% yield) as a white solid.

**MP:** 86–88 °C.

**<sup>1</sup>H NMR** (400 MHz, CDCl<sub>3</sub>)  $\delta$  7.30 (d,  $J$  = 8.3 Hz, 2H), 7.18–7.10 (m, 4H), 7.04–7.00 (m, 1H), 6.98 (d,  $J$  = 1.7 Hz, 1H), 3.74 (dt,  $J$  = 9.4, 7.0 Hz, 1H), 3.61–3.55 (m, 1H), 2.60–2.50 (m, 1H), 2.44–2.37 (m, 1H), 2.40 (s, 3H), 2.24–2.12 (m, 2H), 2.21 (s, 3H), 2.01–1.86 (m, 2H), 1.05 (t,  $J$  = 7.3 Hz, 3H).

**<sup>13</sup>C NMR** (101 MHz, CDCl<sub>3</sub>)  $\delta$  145.2, 142.2, 138.1, 137.4, 129.0, 127.9, 127.9, 127.6, 127.1, 124.0, 73.0, 50.6, 41.2, 31.4, 23.4, 21.7, 21.5, 9.7.

**HRMS** (ESI)  $m/z$ : [M + Na]<sup>+</sup> Calcd for C<sub>20</sub>H<sub>25</sub>NNaO<sub>2</sub>S<sup>+</sup> 366.1498; Found 366.1499.

**IR** (neat) cm<sup>-1</sup>  $\nu$ : 1600 (w), 1468 (w), 1452 (w), 1330 (s), 1220 (w), 1153 (s), 1094 (s), 1048 (m), 1008 (m), 871 (w), 814 (m), 778 (m), 707 (s).

### 2-(3-chlorophenyl)-2-ethyl-1-tosylpyrrolidine (**9j**)

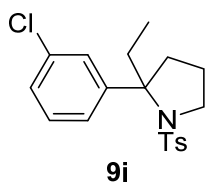

According to the general procedure for the copper-catalyzed methylative cycloamination of alkenes. The crude product was purified by flash column chromatography on silica gel (PE/EtOAc = 6/1) to afford **7j** (45.6 mg, 63% yield) as a white solid.

**MP:** 106–108 °C

**<sup>1</sup>H NMR** (400 MHz, CDCl<sub>3</sub>)  $\delta$  7.26 (d,  $J$  = 8.0 Hz, 2H), 7.20–7.17 (m, 1H), 7.14–7.05 (m, 4H), 7.02 (brs, 1H), 3.65–3.59 (m, 1H), 3.53–3.47 (m, 1H), 2.49–2.40 (m, 1H), 2.32 (s, 3H), 2.29–2.22 (m, 1H), 2.18–2.08 (m, 1H), 2.06–1.96 (m, 1H), 1.92–1.78 (m, 2H), 0.95 (t,  $J$  = 7.3 Hz, 3H).

$^{13}\text{C}$  NMR (101 MHz,  $\text{CDCl}_3$ )  $\delta$  147.7, 142.8, 137.8, 134.0, 129.3, 127.3, 126.99, 126.96, 125.0, 72.7, 50.6, 41.2, 31.3, 23.3, 21.6, 9.6.

HRMS (ESI)  $m/z$ :  $[\text{M} + \text{H}]^+$  Calcd for  $\text{C}_{19}\text{H}_{23}\text{ClNO}_2\text{S}^+$  364.1133; Found 364.1131.

IR (neat)  $\text{cm}^{-1}$   $\nu$ : 1595 (w), 1570 (w), 1468 (w), 1413 (w), 1329 (s), 1304 (w), 1217 (w), 1153 (s), 1092 (s), 1049 (m), 1008 (m), 1001 (w), 899 (w), 871 (w), 815 (m), 781 (m), 730 (m), 697 (m).

#### 4-(2-ethyl-1-tosylpyrrolidin-2-yl)benzonitrile (**9k**)

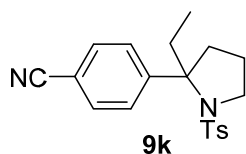

According to the general procedure for the copper-catalyzed methylative cycloamination of alkenes. The crude product was purified by flash column chromatography on silica gel (PE/EtOAc = 6/1) to afford **9k** (48.0 mg, 68% yield) as a colorless oil.

$^1\text{H}$  NMR (400 MHz,  $\text{CDCl}_3$ )  $\delta$  7.60 – 7.52 (m, 2H), 7.51 – 7.46 (m, 2H), 7.43 (d,  $J$  = 8.3 Hz, 2H), 7.21 (d,  $J$  = 8.0 Hz, 2H), 3.74 – 3.61 (m, 2H), 2.55–2.34 (m, 2H), 2.43 (s, 3H), 2.24 (ddd,  $J$  = 13.1, 8.5, 7.5 Hz, 1H), 2.08 (ddd,  $J$  = 13.0, 7.5, 5.3 Hz, 1H), 2.00 – 1.84 (m, 2H), 0.97 (t,  $J$  = 7.3 Hz, 3H).

$^{13}\text{C}$  NMR (101 MHz,  $\text{CDCl}_3$ )  $\delta$  151.6, 143.1, 137.9, 131.9, 129.4, 127.5, 127.0, 118.9, 110.7, 73.1, 50.5, 40.9, 30.8, 23.2, 21.6, 9.6.

HRMS (ESI)  $m/z$ :  $[\text{M} + \text{Na}]^+$  Calcd for  $\text{C}_{20}\text{H}_{22}\text{N}_2\text{NaO}_2\text{S}^+$  377.1294; Found 377.1298.

IR (neat)  $\text{cm}^{-1}$   $\nu$ : 2920 (w), 2227 (w), 1604 (w), 1505 (w), 1405 (w), 1323 (m), 1156 (s), 1093 (m), 909 (w), 848 (m), 814 (m), 755 (s), 750 (s).



## Supplementary Notes

### Scaled up reactions

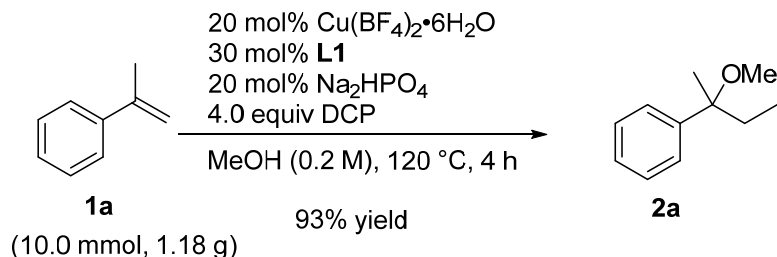

A screw cap flask was charged with Cu(BF<sub>4</sub>)<sub>2</sub>•6H<sub>2</sub>O (690.0 mg, 2.0 mmol), 4,4'-dimethoxy-2,2'-bipyridyl **L1** (650.0 mg, 3.0 mmol), Na<sub>2</sub>HPO<sub>4</sub> (285.0 mg, 2.0 mmol) and MeOH (50.0 mL). The mixture was stirred at room temperature for 30 minutes, then substrate **1a** (10.0 mmol, 1.18 g, 1.0 equiv) and DCP (10.8 g, 40.0 mmol) were added to the above mixture. After being stirred for 4 hours at 120 °C under N<sub>2</sub> atmosphere, the reaction mixture was quenched with water, extracted with EtOAc. The organic extracts were washed with brine, dried over Na<sub>2</sub>SO<sub>4</sub>. The solvent was removed under reduced pressure. The residue was purified by flash chromatography to give **2a** (1.54 g, 93% yield).

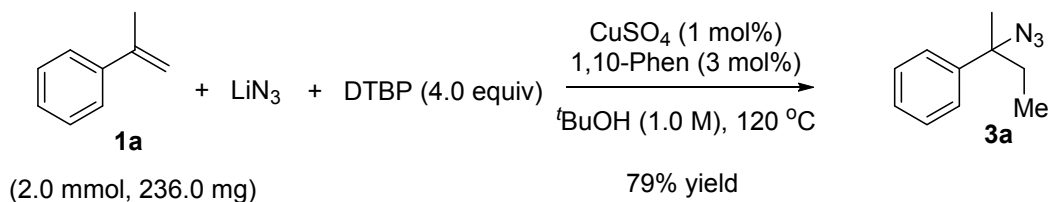

A screw cap flask was charged with CuSO<sub>4</sub> (3.2 mg, 0.02 mmol, 0.01 equiv), 1,10-Phen **L2** (10.8 mg, 0.03 mmol, 0.03 equiv) and <sup>t</sup>BuOH (20 mL). The mixture was stirred at 40 °C for 30 minutes, then cooled to room temperature. Substrate **1a** (2.0 mmol, 236.0 mg, 1.0 equiv), LiN<sub>3</sub> (20% w/w, 2.4 mL, 5.0 equiv) and DTBP (1.5 mL, 4.0 equiv) were added to the above mixture, and the reaction mixture was stirred at 120 °C for 8 hours under N<sub>2</sub> atmosphere. The reaction was quenched with water, and the mixture was extracted with EtOAc. The organic extracts were washed with brine, dried over Na<sub>2</sub>SO<sub>4</sub>. The solvent was removed under reduced pressure. The residue was purified by flash chromatography to give **3a** (275.6 mg, 79% yield).

### Mechanism Study

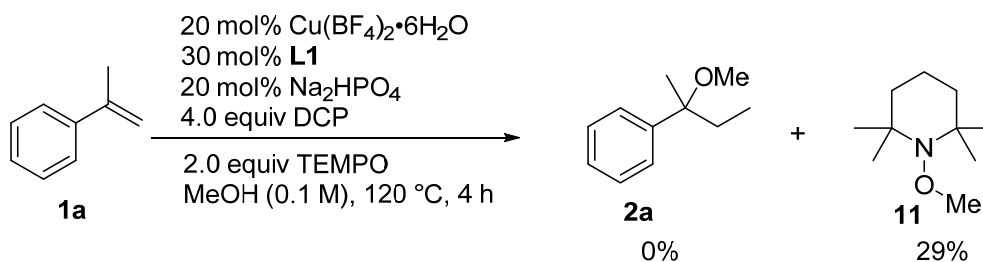

A screw cap tube was charged with  $\text{Cu}(\text{BF}_4)_2 \cdot 6\text{H}_2\text{O}$  (13.8 mg, 0.0400 mmol), 4,4'-dimethoxy-2,2'-bipyridyl **L1** (13.0 mg, 0.0601 mmol),  $\text{Na}_2\text{HPO}_4$  (5.7 mg, 0.0402 mmol) and MeOH (2.0 mL). The mixture was stirred at room temperature for 30 minutes, then substrate **1a** (0.2 mmol, 1.0 equiv), DCP (216.2 mg, 0.800 mmol) and TEMPO (62.6 mg, 0.4 mmol, 2.0 equiv) were added to the above mixture. After being stirred for 4 hours at 120 °C under  $\text{N}_2$  atmosphere, the reaction mixture was quenched with water, extracted with EtOAc. The organic extracts were washed with brine, dried over  $\text{Na}_2\text{SO}_4$ . The solvent was removed under reduced pressure. The residue was purified by flash chromatography to give **11** (19.4 mg, 29% yield). The physical and spectroscopic data were in accordance with those reported in the literature.<sup>8</sup>

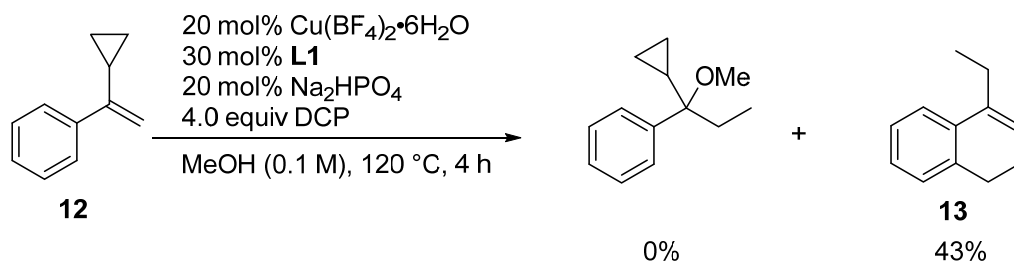

A screw cap tube was charged with  $\text{Cu}(\text{BF}_4)_2 \cdot 6\text{H}_2\text{O}$  (13.8 mg, 0.0400 mmol), 4,4'-dimethoxy-2,2'-bipyridyl **L1** (13.0 mg, 0.0601 mmol),  $\text{Na}_2\text{HPO}_4$  (5.7 mg, 0.0402 mmol) and MeOH (2.0 mL). The mixture was stirred at room temperature for 30 minutes, then substrate **12** (0.2 mmol, 1.0 equiv) and DCP (216.2 mg, 0.800 mmol) were added to the above mixture. After being stirred for 4 hours at 120 °C under  $\text{N}_2$  atmosphere, the reaction mixture was quenched with water, extracted with EtOAc. The organic extracts were washed with brine, dried over  $\text{Na}_2\text{SO}_4$ . The solvent was removed under reduced pressure. The residue was purified by flash chromatography to give **13** (15.4 mg, 43% yield). The physical and spectroscopic data were in accordance with those reported in the literature.<sup>9</sup>

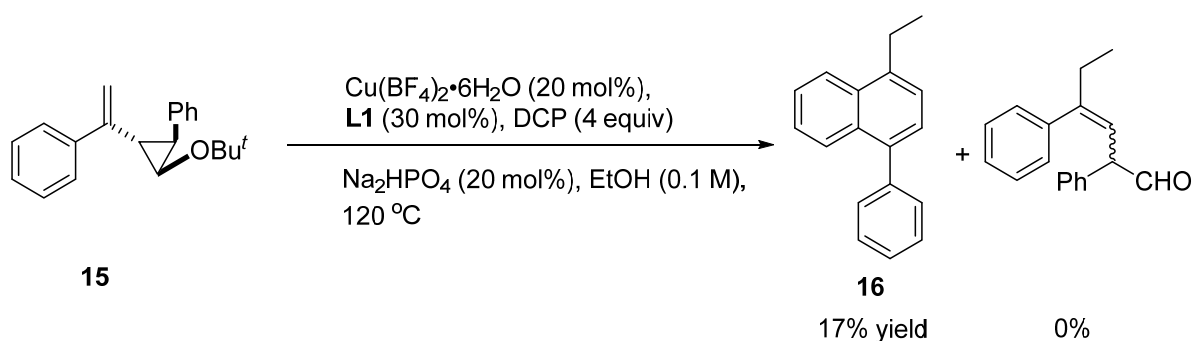

A screw cap tube was charged with  $\text{Cu}(\text{BF}_4)_2 \cdot 6\text{H}_2\text{O}$  (13.8 mg, 0.0400 mmol), 4,4'-dimethoxy-2,2'-bipyridyl **L1** (13.0 mg, 0.0601 mmol),  $\text{Na}_2\text{HPO}_4$  (5.7 mg, 0.0402 mmol) and EtOH (2.0 mL). The mixture was stirred at 40 °C for 30 minutes, then cooled to room temperature. Substrate **15**<sup>10</sup> (54.5 mg, 0.2 mmol, 1.0 equiv) and DTBP (0.15 mL, 4.0 equiv) were added to the above mixture, and the reaction mixture was stirred at 120 °C for 4 hours under  $\text{N}_2$  atmosphere. The reaction was quenched with water, and the mixture was extracted with EtOAc. The organic extracts were washed with brine, dried over  $\text{Na}_2\text{SO}_4$ . The solvent was removed under reduced pressure. The residue was purified by flash chromatography to give **16** (7.9 mg, 17% yield) as a white solid.

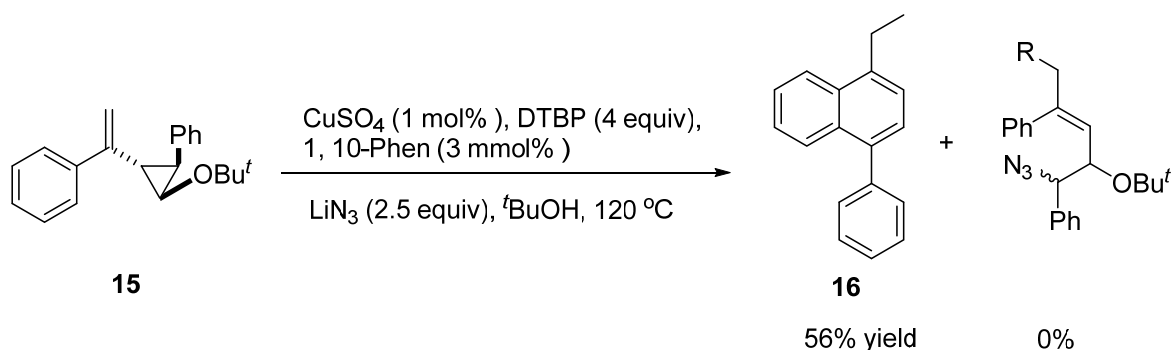

A screw cap tube was charged with  $\text{CuSO}_4$  (0.32 mg, 0.002 mmol, 0.01 equiv), 1, 10-Phen (1.08 mg, 0.003 mmol, 0.03 equiv) and  $t\text{BuOH}$  (2.0 mL). The mixture was stirred at 40 °C for 30 minutes, then cooled to room temperature. Substrate **15** (54.5 mg, 0.2 mmol, 1.0 equiv),  $\text{LiN}_3$  (20% w/w, 0.12 mL, 2.5 equiv), DTBP (0.15 mL, 4.0 equiv) were added to the above mixture, and the reaction mixture was stirred at 120 °C for 8 hours under  $\text{N}_2$  atmosphere. The reaction was quenched with water, and the mixture was extracted with EtOAc. The organic extracts were washed with brine, dried over  $\text{Na}_2\text{SO}_4$ . The solvent was removed under reduced pressure. The residue was purified by flash chromatography to give **16** (26.2 mg, 56% yield) as a white solid.

#### Characterization of 1-ethyl-4-phenylnaphthalene (**16**)

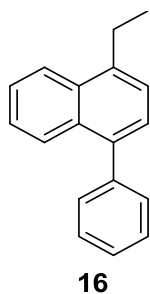

**MP:** 34–36 °C

**<sup>1</sup>H NMR** (400 MHz, CDCl<sub>3</sub>) δ 8.04 (dd, *J* = 8.7, 1.2 Hz, 1H), 7.84 (dd, *J* = 8.5, 1.2 Hz, 1H), 7.48–7.37 (m, 5H), 7.36–7.23 (m, 4H), 3.08 (q, *J* = 7.5 Hz, 2H), 1.35 (t, *J* = 7.5 Hz, 3H).

**<sup>13</sup>C NMR** (101 MHz, CDCl<sub>3</sub>) δ 141.2, 139.9, 138.7, 132.1, 132.0, 130.3, 128.3, 127.2, 127.0, 126.9, 125.7, 125.6, 124.6, 124.1, 26.2, 15.2.

**HRMS** (APPI) *m/z*: [M]<sup>+</sup> Calcd for C<sub>18</sub>H<sub>16</sub><sup>+</sup> 232.1247; Found 232.1247.

**IR** (neat) cm<sup>-1</sup> ν: 1592 (w), 1492 (w), 1459 (w), 1423 (w), 1392 (w), 1072 (w), 1033 (w), 845 (m), 764 (s), 700 (s).

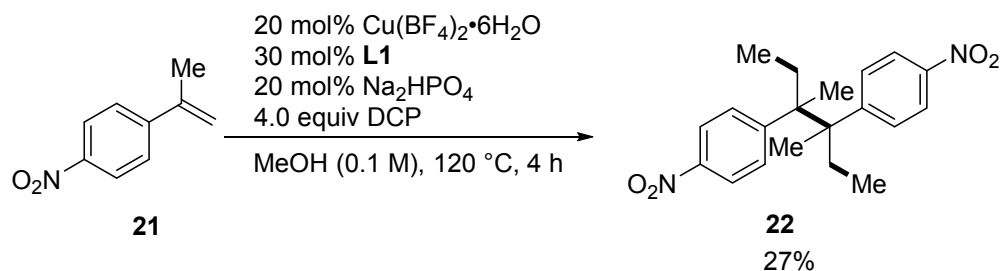

A screw cap tube was charged with Cu(BF<sub>4</sub>)<sub>2</sub>•6H<sub>2</sub>O (13.8 mg, 0.0400 mmol), 4,4'-dimethoxy-2,2'-bipyridyl **L1** (13.0 mg, 0.0601 mmol), Na<sub>2</sub>HPO<sub>4</sub> (5.7 mg, 0.0402 mmol) and MeOH (2.0 mL). The mixture was stirred at room temperature for 30 minutes, then substrate **21** (32.6 mg, 0.2 mmol, 1.0 equiv) and DCP (216.2 mg, 0.800 mmol) were added to the above mixture. After being stirred for 4 hours at 120 °C under N<sub>2</sub> atmosphere, the reaction mixture was quenched with water, extracted with EtOAc. The organic extracts were washed with brine, dried over Na<sub>2</sub>SO<sub>4</sub>. The solvent was removed under reduced pressure. The residue was purified by flash chromatography to give **22** (9.6 mg, 27% yield) as a colorless oil.

**Characterization of 4,4'-(3,4-dimethylhexane-3,4-diyl)bis(nitrobenzene) (22)**

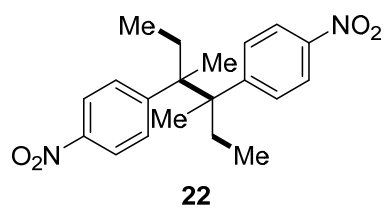

**<sup>1</sup>H NMR** (400 MHz, CDCl<sub>3</sub>)  $\delta$  8.10–8.02 (m, 4H), 7.16–7.02 (m, 4H), 2.27–2.89 (m, 1H), 2.09–1.98 (m, 1H), 1.72–1.57 (m, 2H), 1.34 (s, 6H), 0.53 (t,  $J = 7.3$  Hz, 3H), 0.52 (t,  $J = 7.3$  Hz, 3H).

**<sup>13</sup>C NMR** (101 MHz, CDCl<sub>3</sub>)  $\delta$  151.1, 151.0, 146.1, 130.5, 130.4, 122.0, 121.9, 49.2, 49.0, 27.8, 27.5, 21.3, 20.9, 9.0, 8.9.

**HRMS** (ESI) calcd for C<sub>20</sub>H<sub>25</sub>N<sub>2</sub>O<sub>4</sub><sup>+</sup> [M+H]<sup>+</sup> 357.1809; found 357.1804.

**IR** (neat) cm<sup>-1</sup>  $\nu$ : 3081 (w), 2976 (w), 2934 (w), 2882 (w), 2851 (w), 1595 (w), 1512 (s), 1344 (s), 1112 (w), 1087 (w), 1013 (w), 860 (s), 707 (s).

## Supplementary References

1. Alves, T. M. F.; Costa, M. O.; Bispo, B. A. D.; Pedrosa, F. L.; Ferreira, M. A. B. Cobalt-catalyzed oxidative cyclization of *gem*-disubstituted conjugated alkenols. *Tetrahedron Lett.* **2016**, *57*, 3334-3338.
2. Rösner, C.; Hennecke, U. Homohalocyclization: Electrophilic Bromine-Induced Cyclizations of Cyclopropanes. *Org. Lett.* **2015**, *17*, 3226–3229.
3. Zhou, L.; Tan, C. K.; Jiang, X.; Chen, F.; Yeung, Y.-Y. Asymmetric bromolactonization using amino-thiocarbamate catalyst. *J. Am. Chem. Soc.* **2010**, *132*, 15474–15476.
4. Ning, Z.; Jin, R.; Ding, J.; Gao, L. Enantioselective iodolactonizations of 4-pentenoic acid derivatives mediated by chiral salen-Co(II) complex. *Synlett* **2009**, 2291–2294.
5. Zhu, R.; Buchwald, S. L. Versatile Enantioselective Synthesis of Functionalized Lactones via Copper-Catalyzed Radical Oxyfunctionalization of Alkenes. *J. Am. Chem. Soc.* **2015**, *137*, 8069–8077.
6. Zhou, L.; Chen, J.; Tan, C. K.; Yeung, Y.-Y. Enantioselective bromoaminocyclization using amino-thiocarbamate catalysts. *J. Am. Chem. Soc.* **2011**, *133*, 9164–9167.
7. Dohi, T.; Takenaga, N.; Goto, A.; Maruyama, A.; Kita, Y. Direct Lactone Formation by Using Hypervalent Iodine(III) Reagents with KBr via Selective C–H Abstraction Protocol. *Org. Lett.* **2007**, *7*, 3129–3132.
8. Wang, Y.; Zhang, L.; Yang, Y.; Zhang, P.; Du, Z.; Wang, C. Alkene oxyalkylation enabled by merging rhenium catalysis with hypervalent iodine(III) reagents via decarboxylation. *J. Am. Chem. Soc.* **2013**, *135*, 9164–9167.
9. Adamczyk, M.; Watt, D. S.; Netzel, D. A. Synthesis of biological markers in fossil fuels. 2. Synthesis and carbon-13 NMR studies of substituted indans and tetralins. *J. Org. Chem.* **1984**, *49*, 4226–4237.
10. Compound **15** was prepared according to the reported procedure: Um, C.; Chemler, S. R. Synthesis of 2-Aryl- and 2-Vinylpyrrolidines via Copper-Catalyzed Coupling of Styrenes and Dienes with Potassium  $\beta$ -Aminoethyl Trifluoroborates. *Org. Lett.* **2016**, *18*, 2515–2518.
